# Supplementary material for: Cross-kingdom RNAi adds a new layer of communication to the arbuscular mycorrhizal symbiosis
Source: Research Square preprint supplement (doi:10.21203/rs.3.rs-3423345/v1), 2023-10-17
Supplement: Supplementary file 1 [file 0cddc353fcb9682ded34963e.xlsx]

## Sheet: Foglio1
Supplementary Table 2. Rir2216 isoform abundance.
						Rir2216; 21-nt isoform		Rir2216; 22-nt isoform		Rir2216; 23-nt isoform		Rir2216; 24-nt isoform
						TTTTCTTCATCTTCCTCCTCG		TTTTCTTCATCTTCCTCCTCGA		TTTTCTTCATCTTCCTCCTCGAT		TTTTCTTCATCTTCCTCCTCGATT
Publication	Condition	Species	SRA/ENA accessions	total_Rhizophagus_mapped_reads	relative_library_size	reads	RPMM	reads	RPMM	reads	RPMM	reads	RPMM
Dellaire_et_al.2021	germinating spores, untreated1	R. irregularis	SRR14251174; SRR14251175; SRR14251176; SRR14251177	5207249	0.250496	95	18.2438	130	24.9652	498	95.6359	1900	364.876
Dellaire_et_al.2021	germinating spores, NaIO4 oxidation (2′-O-methylated sRNAs)	R. irregularis	SRR14251178; SRR14251179; SRR14251180; SRR14251181	12411930	0.59708	152	12.2463	446	35.9332	1167	94.0224	7630	614.731
Dellaire_et_al.2021	germinating spores, untreated2	R. irregularis	SRR14251182; SRR14251183; SRR14251184	4732603	0.227663	2	0.4226	4	0.845201	16	3.3808	266	56.2059
Dellaire_et_al.2021	germinating spores, TraPR (AGO-loaded sRNAs)	R. irregularis	SRR14251185; SRR14251186; SRR14251187	20787712	1	72	3.46358	94	4.5219	120	5.77264	2103	101.166
Devers_et_al.2011	mycorrhizal root	R. irregularis + M. truncatula	SRR088874	81222	0.00390721	0	0	0	0	0	0	1	12.3119
Mewalal_et_al.2019	mycorrhizal root	R. irregularis + Populus deltoides	SRR7525690; SRR7525691; SRR7525692	15077	0.000725284	0	0	0	0	0	0	0	0
Mewalal_et_al.2019	mycorrhizal root	R. irregularis + Populus trichocarpa	SRR7525699; SRR7525700; SRR7525701	20400	0.000981349	0	0	0	0	0	0	0	0
Pandey_et_al.2018	mycorrhizal root	R. irregularis + Nicotiana attenuata	SRR6473125; SRR6473120; SRR6473126	3391358	0.163142	15	4.42301	39	11.4998	14	4.12814	170	50.1274
Silvestri_et_al.2019	mycorrhizal root	R. irregularis + M. truncatula	ERR2841785; ERR2841786; ERR2841787	5758912	0.277034	78	13.5442	13	2.25737	7	1.21551	49	8.50855
Zeng_et_al.2022	mycorrhizal root	R. irregularis + Solanum lycopersicum	SRR16643541; SRR16643554; SRR16643555	3474713	0.167152	167	48.0615	177	50.9395	401	115.405	1334	383.917
