# Supplementary material for: Cross-kingdom RNAi adds a new layer of communication to the arbuscular mycorrhizal symbiosis
Source: Research Square preprint supplement (doi:10.21203/rs.3.rs-3423345/v1), 2023-10-17
Supplement: Supplementary file 2 [file 3f3927fb733c20afefb726d4.xlsx]

## Sheet: Sheet 1
Supplementary Table 1. Target prediction of fungal sRNAs upregulated in the intraradical mycelium.
sRNA_generating_locus	sRNA_sequence	sRNA_length	Target_Acc.	Target_Desc.	Expectation	UPE.	miRNA_start	miRNA_end	Target_start	Target_end	miRNA_aligned_fragment	alignment	Target_aligned_fragment	Inhibition	Multiplicity
Cluster_832	UUUUCUUCAUCUUCCUCCUCG	21	Medtr2g099480.1	| CTC-interacting domain protein, putative | HC | chr2:42641646-42649233 | 20130731	0	-1	1	21	20	40	UUUUCUUCAUCUUCCUCCUCG	::::::::::::::::::::	AGAGGAGGAAGAUGAAGAAAA	Cleavage	1
Cluster_1114	UUUUGCAACAAUCACCAAUAGCCU	24	Medtr3g465300.1	| cytochrome P450 family protein | HC | chr3:26408512-26411886 | 20130731	0.5	-1	1	24	1563	1586	UUUUGCAACAAUCACCAAUAGCCU	:: :::::::.:::::::::::	GAGCCAUUGGUGGUUGUUGCAAAA	Cleavage	1
Cluster_1071	UCGUAAUGUUCUCGAUUGUUGCCU	24	Medtr4g071520.1	| squalene synthase | HC | chr4:27032938-27040046 | 20130731	1	-1	1	24	787	810	UCGUAAUGUUCUCGAUUGUUGCCU	::: .::::::::.:::::::::	AGGAUGCAAUCGAGGACAUUACGA	Cleavage	1
Cluster_128	UUGUAUGGAUCAUCAUUUAGUUGA	24	Medtr2g023860.1	| F-box plant-like protein, putative | HC | chr2:8458211-8460050 | 20130731	1	-1	1	24	622	645	UUGUAUGGAUCAUCAUUUAGUUGA	:: :::: ::::::::::::::	CAAAAUAAAGGAUGAUCCAUACAA	Cleavage	1
Cluster_1297	UGUUCAUCAGAUUGGUCUUCUGG	23	Medtr8g059345.1	| disease resistance protein (CC-NBS-LRR class) family protein | LC | chr8:20820746-20812862 | 20130731	1	-1	1	23	994	1016	UGUUCAUCAGAUUGGUCUUCUGG	.:::::::::::::.::.:::	GGGGAAGACCAAUCUGGUGGACA	Cleavage	1
Cluster_1351	UAUAGAUUGGCAUAGAUGAUGAUG	24	Medtr7g090290.1	| hypothetical protein | LC | chr7:35450577-35448376 | 20130731	1	-1	1	24	845	868	UAUAGAUUGGCAUAGAUGAUGAUG	::::: :::::::::::::::	AUGCAUCAGCUAUGCCAAUCUAUA	Cleavage	1
Cluster_1606	UUUUAAUUACAUGAACUCUCUGA	23	Medtr3g118360.3	| alanine-tRNA ligase | HC | chr3:55395877-55403229 | 20130731	1	-1	1	23	3211	3233	UUUUAAUUACAUGAACUCUCUGA	: ::::::::::::::::..:	AAAAAGAGUUCAUGUAAUUAGGA	Cleavage	1
Cluster_164	UUUUGAGAUUGUGAGGAAG	19	Medtr7g055987.1	| F-box protein interaction domain protein | LC | chr7:19352004-19350479 | 20130731	1	-1	1	19	841	859	UUUUGAGAUUGUGAGGAAG	.::.:::::::::::::::	UUUUCUCACAAUCUCAAAA	Cleavage	1
Cluster_1712	AAAUUUCAUAUAGUUCUAGGACCU	24	Medtr4g056580.1	| hypothetical protein | HC | chr4:20776362-20777022 | 20130731	1	-1	1	24	478	501	AAAUUUCAUAUAGUUCUAGGACCU	: : ::::::::::::::::::	GAGACGUAGAACUAUAUGAAAUUU	Cleavage	1
Cluster_1741	UUGUAGAUACUGAAAUUCCUUAUU	24	Medtr5g010420.1	| heavy metal P-type ATPase | HC | chr5:2783669-2773962 | 20130731	1	-1	1	24	2322	2345	UUGUAGAUACUGAAAUUCCUUAUU	:: ::::::::.::::::::.::	AAACAGGAAUUUUAGUAUCUAUAA	Cleavage	1
Cluster_1774	UAGGAUUUCUUUCUGGUAACGGAC	24	Medtr8g030600.1	| anion transporter 4 | HC | chr8:11322328-11316612 | 20130731	1	-1	1	24	2055	2078	UAGGAUUUCUUUCUGGUAACGGAC	::::::::::::::::.:.	UAUUUUUACCAGAAAGAAAUCUUG	Cleavage	1
Cluster_1774	UAGGAUUUCUUUCUGGUAACGGAC	24	Medtr8g030600.2	| anion transporter 4 | HC | chr8:11322328-11316612 | 20130731	1	-1	1	24	2654	2677	UAGGAUUUCUUUCUGGUAACGGAC	::::::::::::::::.:.	UAUUUUUACCAGAAAGAAAUCUUG	Cleavage	1
Cluster_2010	UAAUUAGAUUCUUGAAUCGCCU	22	Medtr8g040730.1	| sulfotransferase | HC | chr8:15172205-15168737 | 20130731	1	-1	1	22	1418	1439	UAAUUAGAUUCUUGAAUCGCCU	:: ::::::::::.:::::::.	AGUCGAUUCAAGAGUCUAAUUG	Cleavage	1
Cluster_2046	UAUAGAUUGGCAUAGAUGAUGAUG	24	Medtr7g090290.1	| hypothetical protein | LC | chr7:35450577-35448376 | 20130731	1	-1	1	24	845	868	UAUAGAUUGGCAUAGAUGAUGAUG	::::: :::::::::::::::	AUGCAUCAGCUAUGCCAAUCUAUA	Cleavage	1
Cluster_2080	UCUUGAUCUCUUUCCUUUUGGUACU	25	Medtr1g048380.1	| hypothetical protein | LC | chr1:18331781-18329533 | 20130731	1	-1	1	25	700	724	UCUUGAUCUCUUUCCUUUUGGUACU	:. .::.:::::.::::::::::	GAUGAUAAGAGGAAGGAGAUCAAGA	Cleavage	1
Cluster_2080	UCUUGAUCUCUUUCCUUUUGGUACU	25	Medtr4g036615.1	| hypothetical protein | LC | chr4:13257266-13256934 | 20130731	1	-1	1	25	181	205	UCUUGAUCUCUUUCCUUUUGGUACU	::::::.:::.::::::::	GCGCAAAAAAGGGAAGGGAUCAAGA	Cleavage	1
Cluster_2124	AGGCAAAGAACAAUGAUGAAAU	22	Medtr3g069910.1	| legume lectin beta domain protein | HC | chr3:31296273-31297859 | 20130731	1	-1	1	22	71	92	AGGCAAAGAACAAUGAUGAAAU	:::::::::::::::::..:	GAUUCAUCAUUGUUCUUUGUUU	Cleavage	1
Cluster_547	UGAUUCCAAUCUGAUCUUAUUGUC	24	Medtr4g097090.1	| spermidine hydroxycinnamoyl transferase | HC | chr4:39997121-39995412 | 20130731	1	-1	1	24	191	214	UGAUUCCAAUCUGAUCUUAUUGUC	:::..::::::::::::::::	CCGAAUGGGAUCAGAUUGGAAUCA	Cleavage	1
Cluster_571	UUUCAUAUCUGGUAGCUUGGCAUA	24	Medtr3g091770.3	| transmembrane protein, putative | HC | chr3:41778274-41773956 | 20130731	1	-1	1	24	545	568	UUUCAUAUCUGGUAGCUUGGCAUA	: :: .:::.::::::::::::::	UCUGAUAAGUUACCAGAUAUGAAA	Cleavage	1
Cluster_571	UUUCAUAUCUGGUAGCUUGGCAUA	24	Medtr3g091770.1	| transmembrane protein, putative | HC | chr3:41778284-41773956 | 20130731	1	-1	1	24	338	361	UUUCAUAUCUGGUAGCUUGGCAUA	: :: .:::.::::::::::::::	UCUGAUAAGUUACCAGAUAUGAAA	Cleavage	1
Cluster_571	UUUCAUAUCUGGUAGCUUGGCAUA	24	Medtr3g091770.2	| transmembrane protein, putative | HC | chr3:41778296-41773956 | 20130731	1	-1	1	24	355	378	UUUCAUAUCUGGUAGCUUGGCAUA	: :: .:::.::::::::::::::	UCUGAUAAGUUACCAGAUAUGAAA	Cleavage	1
Cluster_629	UUUUUUCUUGGAAGAGCUAGCCG	23	Medtr1g032590.1	| RNA-directed RNA polymerase | HC | chr1:11614495-11618760 | 20130731	1	-1	1	23	2265	2287	UUUUUUCUUGGAAGAGCUAGCCG	: : :: ::::::::::::::::	CAGAUAUCUCUUCCAAGAAAAAA	Cleavage	1
Cluster_629	UUUUUUCUUGGAAGAGCUAGCCG	23	Medtr3g029990.2	| ubiquitin carboxyl-terminal hydrolase family protein | HC | chr3:9456270-9464177 | 20130731	1	-1	1	23	1600	1622	UUUUUUCUUGGAAGAGCUAGCCG	: :::.::::::::::.::::	AAGAUAGUUCUUCCAAGAGAAAA	Cleavage	1
Cluster_629	UUUUUUCUUGGAAGAGCUAGCCG	23	Medtr3g029990.1	| ubiquitin carboxyl-terminal hydrolase family protein | HC | chr3:9456270-9462535 | 20130731	1	-1	1	23	1600	1622	UUUUUUCUUGGAAGAGCUAGCCG	: :::.::::::::::.::::	AAGAUAGUUCUUCCAAGAGAAAA	Cleavage	1
Cluster_646	UCUCCUUGGUCUUCCAGUCUGUGC	24	Medtr3g084040.1	| RNA-binding (RRM/RBD/RNP motif) family protein | HC | chr3:37961723-37963823 | 20130731	1	-1	1	24	369	392	UCUCCUUGGUCUUCCAGUCUGUGC	: :::::::::::.:::::.::	AGAGAGACUGGAAGAUCAAGGGGA	Cleavage	1
Cluster_646	UCUCCUUGGUCUUCCAGUCUGUGC	24	Medtr3g084040.2	| RNA-binding (RRM/RBD/RNP motif) family protein | HC | chr3:37961794-37963766 | 20130731	1	-1	1	24	298	321	UCUCCUUGGUCUUCCAGUCUGUGC	: :::::::::::.:::::.::	AGAGAGACUGGAAGAUCAAGGGGA	Cleavage	1
Cluster_721	UAUGAUUUAUAAUGAGGAUGAAG	23	Medtr1g029670.1	| MADS-box transcription factor | HC | chr1:10225617-10223486 | 20130731	1	-1	1	23	14	36	UAUGAUUUAUAAUGAGGAUGAAG	: .:::.::::::::::::::.	AUAUAUCUUCAUUAUAAAUCAUG	Cleavage	1
Cluster_727	AGAUUUUGAUCUUUAAAAGGCCU	23	Medtr6g086560.1	| sigma factor sigb regulation protein rsbq protein, putative | HC | chr6:32152457-32148021 | 20130731	1	-1	1	23	368	390	AGAUUUUGAUCUUUAAAAGGCCU	:: ::::::::::::::::	GGUGCUAUUAAAGAUCAAAAUCU	Cleavage	1
Cluster_832	UUUUCUUCAUCUUCCUCCUCG	21	Medtr2g099940.1	| nucleosome assembly protein | HC | chr2:42867059-42870999 | 20130731	1	-1	1	21	1151	1171	UUUUCUUCAUCUUCCUCCUCG	.::::::::::::::::..::	UGAGGAGGAAGAUGAAGGGAA	Cleavage	1
Cluster_832	UUUUCUUCAUCUUCCUCCUCG	21	Medtr1g023965.1	| hypothetical protein | LC | chr1:7741635-7742815 | 20130731	1	-1	1	21	926	946	UUUUCUUCAUCUUCCUCCUCG	.::::::::.:::::::::.:	UGAGGAGGAGGAUGAAGAAGA	Cleavage	1
Cluster_832	UUUUCUUCAUCUUCCUCCUCG	21	Medtr4g028360.1	| Lipid transfer protein | HC | chr4:9781345-9778239 | 20130731	1	-1	1	21	620	640	UUUUCUUCAUCUUCCUCCUCG	.::: ::::::::::::::::	UGAGUAGGAAGAUGAAGAAAA	Cleavage	1
Cluster_832	UUUUCUUCAUCUUCCUCCUCG	21	Medtr4g028360.2	| Lipid transfer protein | HC | chr4:9781345-9779732 | 20130731	1	-1	1	21	620	640	UUUUCUUCAUCUUCCUCCUCG	.::: ::::::::::::::::	UGAGUAGGAAGAUGAAGAAAA	Cleavage	1
Cluster_832	UUUUCUUCAUCUUCCUCCUCG	21	Medtr2g435530.1	| mono/di-acylglycerol lipase, amine-terminal; lipase, class 3 | HC | chr2:13723417-13729638 | 20130731	1	-1	1	21	75	95	UUUUCUUCAUCUUCCUCCUCG	:::::::.:::::::::.:	GAAGGAGGAGGAUGAAGAAGA	Cleavage	1
Cluster_832	UUUUCUUCAUCUUCCUCCUCG	21	Medtr2g083870.1	| WRKY family transcription factor | HC | chr2:35206335-35202007 | 20130731	1	-1	1	21	517	537	UUUUCUUCAUCUUCCUCCUCG	::::::.::::::::::.:	AAAGGAGGGAGAUGAAGAAGA	Cleavage	1
Cluster_832	UUUUCUUCAUCUUCCUCCUCG	21	Medtr3g111890.2	| HhH-GPD base excision DNA repair family protein | HC | chr3:52367273-52369676 | 20130731	1	-1	1	21	99	119	UUUUCUUCAUCUUCCUCCUCG	:: ::::::::::::::::	GAAGAAGGAAGAUGAAGAAAA	Cleavage	1
Cluster_832	UUUUCUUCAUCUUCCUCCUCG	21	Medtr3g111890.1	| HhH-GPD base excision DNA repair family protein | HC | chr3:52367273-52371800 | 20130731	1	-1	1	21	99	119	UUUUCUUCAUCUUCCUCCUCG	:: ::::::::::::::::	GAAGAAGGAAGAUGAAGAAAA	Cleavage	1
Cluster_832	UUUUCUUCAUCUUCCUCCUCG	21	Medtr8g016250.1	| hypothetical protein | HC | chr8:5463605-5463811 | 20130731	1	-1	1	21	149	169	UUUUCUUCAUCUUCCUCCUCG	: : :::::::::::::::::	CCAAGAGGAAGAUGAAGAAAA	Cleavage	1
Cluster_832	UUUUCUUCAUCUUCCUCCUCG	21	Medtr1g106810.1	| transmembrane protein, putative | LC | chr1:48096627-48096870 | 20130731	1	-1	1	21	180	200	UUUUCUUCAUCUUCCUCCUCG	:::: ::::::::::::::	UAAGGAAGAAGAUGAAGAAAA	Cleavage	1
Cluster_913	AAAAAUUCGAUCCAGAAAGAU	21	Medtr1g016430.1	| calcineurin B-like protein 4-1 | HC | chr1:4365435-4363297 | 20130731	1	-1	1	21	127	147	AAAAAUUCGAUCCAGAAAGAU	:.::::::::::::.:::::	CUUUUUCUGGAUCGAGUUUUU	Cleavage	1
Cluster_913	AAAAAUUCGAUCCAGAAAGAU	21	Medtr1g016430.3	| calcineurin B-like protein 4-1 | HC | chr1:4368624-4363297 | 20130731	1	-1	1	21	421	441	AAAAAUUCGAUCCAGAAAGAU	:.::::::::::::.:::::	CUUUUUCUGGAUCGAGUUUUU	Cleavage	1
Cluster_913	AAAAAUUCGAUCCAGAAAGAU	21	Medtr1g016430.2	| calcineurin B-like protein 4-1 | HC | chr1:4368624-4363297 | 20130731	1	-1	1	21	325	345	AAAAAUUCGAUCCAGAAAGAU	:.::::::::::::.:::::	CUUUUUCUGGAUCGAGUUUUU	Cleavage	1
Cluster_945	UCAAGAACAGGACUGCACACAUGCC	25	Medtr6g027180.1	| RNA polymerase II-binding domain protein | HC | chr6:9201234-9212785 | 20130731	1	-1	1	25	2057	2081	UCAAGAACAGGACUGCACACAUGCC	::::::::..:::::::::::::	UUCAUGUGUGUGGUCCUGUUCUUGA	Cleavage	1
Cluster_945	UCAAGAACAGGACUGCACACAUGCC	25	Medtr6g027180.2	| RNA polymerase II-binding domain protein | HC | chr6:9202019-9212786 | 20130731	1	-1	1	25	2735	2759	UCAAGAACAGGACUGCACACAUGCC	::::::::..:::::::::::::	UUCAUGUGUGUGGUCCUGUUCUUGA	Cleavage	1
Cluster_1000	UAAUCAAACCAUACCAUCAGCACC	24	Medtr1g063840.1	| ubiquitin family protein | HC | chr1:28022588-28023302 | 20130731	1.5	-1	1	24	490	513	UAAUCAAACCAUACCAUCAGCACC	:: :::::::::::::::: ::	CAUGGUGAUGGUAUGGUUUGAAUA	Cleavage	1
Cluster_104	UGUUCUUAAAGGUGGUAACUUCGC	24	Medtr2g101560.1	| peptide/nitrate transporter plant | HC | chr2:43684834-43691666 | 20130731	1.5	-1	1	24	832	855	UGUUCUUAAAGGUGGUAACUUCGC	:::.:..::::::::::::	UAUCUGUUGCUGCCUUUAAGAACA	Cleavage	1
Cluster_1054	UUUUAUUAUGUUUGGUGGAGG	21	Medtr2g102570.1	| gibberellin 2-beta-dioxygenase | HC | chr2:44198670-44200810 | 20130731	1.5	-1	1	21	1463	1483	UUUUAUUAUGUUUGGUGGAGG	..: .::::::::::::::::	UUUGUACCAAACAUAAUAAAA	Cleavage	1
Cluster_1058	AAGGAAGAUAACAAGGAGAUG	21	Medtr3g465390.1	| PPR domain protein | HC | chr3:26449470-26452511 | 20130731	1.5	-1	1	21	162	182	AAGGAAGAUAACAAGGAGAUG	:.::.:::::::.::::::	UCUUUCUUUGUUAUUUUCCUU	Cleavage	1
Cluster_1058	AAGGAAGAUAACAAGGAGAUG	21	Medtr7g071990.2	| D-alanine-D-alanine ligase | HC | chr7:26735511-26724110 | 20130731	1.5	-1	1	21	3368	3388	AAGGAAGAUAACAAGGAGAUG	:::.::::::::.:::.::	AUUCUUCUUGUUAUUUUCUUU	Cleavage	1
Cluster_106	ACGUCCAUAUCAAAAGGUUGAU	22	Medtr8g032930.1	| hypothetical protein | LC | chr8:12627388-12628905 | 20130731	1.5	-1	1	22	65	86	ACGUCCAUAUCAAAAGGUUGAU	::::::::::::::::::: :	UUCAACCUUUUGAUAUGGACUU	Cleavage	1
Cluster_1060	UGAGAUAAACUUCCAGUAGAUGCUC	25	Medtr4g113740.1	| transmembrane protein, putative | HC | chr4:46812595-46809774 | 20130731	1.5	-1	1	25	764	788	UGAGAUAAACUUCCAGUAGAUGCUC	:::::.:::::::::.:.:::	UGCAAUCUAUUGGAAGUUUGUUUCA	Cleavage	1
Cluster_107	UUUAGGAUACAUGUGGAUACA	21	Medtr2g089865.1	| wound-responsive family protein | HC | chr2:38003407-38005328 | 20130731	1.5	-1	1	21	295	315	UUUAGGAUACAUGUGGAUACA	:::: ::::::::.:::::	AUUAUCAACAUGUAUUCUAAA	Cleavage	1
Cluster_1183	UUGAUGUAAAACUUUAACUUGGCC	24	Medtr7g098090.1	| peptide transporter | HC | chr7:39196787-39193089 | 20130731	1.5	-1	1	24	1982	2005	UUGAUGUAAAACUUUAACUUGGCC	::: :.:::::::::::::	UUGUCAGUAAGAGUUUUACAUCAA	Cleavage	1
Cluster_1193	UGAGGUUGAACUUGAGGCAUGG	22	Medtr4g105610.1	| CO2+/MG2+ efflux protein ApaG | HC | chr4:43850627-43846537 | 20130731	1.5	-1	1	22	343	364	UGAGGUUGAACUUGAGGCAUGG	:::. ::::::::::::::	UACUGCUCCAAGUUCAACCUCA	Cleavage	1
Cluster_1194	AGAGGACUCAUGAAUCAAUUCG	22	Medtr4g008880.1	| hypothetical protein | LC | chr4:1730605-1731907 | 20130731	1.5	-1	1	22	689	710	AGAGGACUCAUGAAUCAAUUCG	:::::.::.:::.:::::::	GCAAUUGGUUUAUGGGUCCUCU	Cleavage	1
Cluster_1211	CAAAAGAGAAUCAGACAUGAAC	22	Medtr7g102460.1	| UDP-glucosyltransferase family protein | HC | chr7:41516988-41518754 | 20130731	1.5	-1	1	22	1630	1651	CAAAAGAGAAUCAGACAUGAAC	:.::::::::::.:.:::::	UAUUAUGUCUGAUUUUUUUUUG	Cleavage	1
Cluster_123	UAGUGAACUUUUGAAACUUGGCUC	24	Medtr3g031480.1	| Serine/Threonine kinase, plant-type protein | HC | chr3:26746271-26743577 | 20130731	1.5	-1	1	24	835	858	UAGUGAACUUUUGAAACUUGGCUC	.::::::::::.::::.:::.	ACCUCAAGUUUCAAGAGUUUACUG	Cleavage	1
Cluster_1315	UUGGAGAAUGAGGUUCUGCCU	21	Medtr2g015270.1	| glutamate receptor 3.4 | HC | chr2:4489733-4484918 | 20130731	1.5	-1	1	21	1395	1415	UUGGAGAAUGAGGUUCUGCCU	: ::::::::::.::.::::.	AAGCAGAACCUCGUUUUCCAG	Cleavage	1
Cluster_1319	UUACCUUUUCUUCUAGUUGAU	21	Medtr8g098885.1	| hypothetical protein | LC | chr8:41379788-41381274 | 20130731	1.5	-1	1	21	179	199	UUACCUUUUCUUCUAGUUGAU	: ::: ::::::::::::::.	AACAAGUAGAAGAAAAGGUAG	Cleavage	1
Cluster_1321	UGGAUUAGAGAAUUUGAAG	19	Medtr4g094498.1	| reticuline oxidase-like protein | HC | chr4:38090014-38092211 | 20130731	1.5	-1	1	19	165	183	UGGAUUAGAGAAUUUGAAG	:::::.:::::.:.:::::	CUUCAGAUUCUUUGAUCCA	Cleavage	1
Cluster_1342	UAAAAUUAUUUAAAGUAUGGACU	23	Medtr7g013260.1	| UDP-glucosyltransferase family protein | HC | chr7:3798077-3801318 | 20130731	1.5	-1	1	23	668	690	UAAAAUUAUUUAAAGUAUGGACU	: :: :::::::::::::::.	GAUGCAAACUUUAAAUAAUUUUG	Cleavage	1
Cluster_1432	UUUCAAGUUCAGGAUAAGGCUGCU	24	Medtr7g490350.1	| strictosidine synthase family protein | HC | chr7:35501372-35504301 | 20130731	1.5	-1	1	24	33	56	UUUCAAGUUCAGGAUAAGGCUGCU	::::::.:::::::::::	CCUCCGCUUAUCUUGAACUUGAAA	Cleavage	1
Cluster_1456	GUUCAGGUCCAGGACUUAAGGAC	23	Medtr3g086260.1	| chalcone and stilbene synthase family protein | HC | chr3:39029461-39032598 | 20130731	1.5	-1	1	23	1155	1177	GUUCAGGUCCAGGACUUAAGGAC	: ..::::::..::::::::.::	GCUUUUAAGUUUUGGACCUGGAC	Cleavage	1
Cluster_1534	GAGGAUAUGAAUUUUGUAAAAA	22	Medtr7g096680.1	| autophagy 9 (APG9) protein | HC | chr7:38799346-38805558 | 20130731	1.5	-1	1	22	1567	1588	GAGGAUAUGAAUUUUGUAAAAA	::.:::::::::::::.:.	UCAUUGCAAAAUUCAUAUCUUU	Cleavage	1
Cluster_1549	AUUCCAUGAAGAUUGUAAAAAUG	23	Medtr1g028380.1	| abscisic acid receptor PYL9-like protein | HC | chr1:9560076-9562623 | 20130731	1.5	-1	1	23	1197	1219	AUUCCAUGAAGAUUGUAAAAAUG	: ::::.:.:::::::::.::	UUUCUUUAUAGUCUUCAUGGGAU	Cleavage	1
Cluster_1557	GAGGAUCUUUCUGUGAUGG	19	Medtr7g111650.1	| meiotically up-regulated protein 71-like protein | HC | chr7:45841976-45835553 | 20130731	1.5	-1	1	19	1850	1868	GAGGAUCUUUCUGUGAUGG	::::::::::::::::.:	CCAUCACAGAAAGAUCUUG	Cleavage	1
Cluster_1557	GAGGAUCUUUCUGUGAUGG	19	Medtr7g111650.4	| meiotically up-regulated protein 71-like protein | HC | chr7:45841976-45835553 | 20130731	1.5	-1	1	19	1817	1835	GAGGAUCUUUCUGUGAUGG	::::::::::::::::.:	CCAUCACAGAAAGAUCUUG	Cleavage	1
Cluster_1557	GAGGAUCUUUCUGUGAUGG	19	Medtr7g111650.5	| meiotically up-regulated protein 71-like protein | HC | chr7:45841977-45835506 | 20130731	1.5	-1	1	19	1847	1865	GAGGAUCUUUCUGUGAUGG	::::::::::::::::.:	CCAUCACAGAAAGAUCUUG	Cleavage	1
Cluster_1557	GAGGAUCUUUCUGUGAUGG	19	Medtr7g111650.2	| meiotically up-regulated protein 71-like protein | HC | chr7:45841976-45835553 | 20130731	1.5	-1	1	19	1817	1835	GAGGAUCUUUCUGUGAUGG	::::::::::::::::.:	CCAUCACAGAAAGAUCUUG	Cleavage	1
Cluster_1557	GAGGAUCUUUCUGUGAUGG	19	Medtr7g111650.3	| meiotically up-regulated protein 71-like protein | HC | chr7:45841989-45835506 | 20130731	1.5	-1	1	19	1863	1881	GAGGAUCUUUCUGUGAUGG	::::::::::::::::.:	CCAUCACAGAAAGAUCUUG	Cleavage	1
Cluster_1559	UGGGAAUGAUCGUUGCAAAUAACC	24	Medtr8g094650.1	| PPR containing plant protein | HC | chr8:39524430-39522502 | 20130731	1.5	-1	1	24	29	52	UGGGAAUGAUCGUUGCAAAUAACC	::::.::::::..::::::	ACUCCUUUGUAACGAUUGUUCCCA	Cleavage	1
Cluster_161	UUCCUGUUAACUCAUGAACU	20	Medtr8g024180.1	| thylakoid membrane phosphoprotein 14 kDa protein | HC | chr8:8854877-8852692 | 20130731	1.5	-1	1	20	521	540	UUCCUGUUAACUCAUGAACU	::::: ::::::::.:::::	AGUUCUUGAGUUAAUAGGAA	Cleavage	1
Cluster_164	UUUUGAGAUUGUGAGGAAG	19	Medtr7g091110.1	| LRR and NB-ARC domain disease resistance protein | LC | chr7:35947613-35943843 | 20130731	1.5	-1	1	19	1789	1807	UUUUGAGAUUGUGAGGAAG	:::.:::..::::::::::	CUUUCUCGUAAUCUCAAAA	Cleavage	1
Cluster_164	UUUUGAGAUUGUGAGGAAG	19	Medtr7g056023.1	| F-box protein interaction domain protein | LC | chr7:19373868-19374792 | 20130731	1.5	-1	1	19	787	805	UUUUGAGAUUGUGAGGAAG	.::.:::::::::::::.:	UUUUCUCACAAUCUCAAGA	Cleavage	1
Cluster_164	UUUUGAGAUUGUGAGGAAG	19	Medtr5g014290.1	| FeS assembly protein SufD | HC | chr5:4770231-4766770 | 20130731	1.5	-1	1	19	168	186	UUUUGAGAUUGUGAGGAAG	:::::::: ::::::::::	CUUCCUCAAAAUCUCAAAA	Translation	1
Cluster_164	UUUUGAGAUUGUGAGGAAG	19	Medtr7g055977.1	| F-box protein interaction domain protein | LC | chr7:19345495-19344347 | 20130731	1.5	-1	1	19	826	844	UUUUGAGAUUGUGAGGAAG	.::.:::::::::::::.:	UUUUCUCACAAUCUCAAGA	Cleavage	1
Cluster_1666	CGACAGCUUCCUUGGAUUCC	20	Medtr4g099030.1	| F-box/LRR plant protein | LC | chr4:40949369-40947873 | 20130731	1.5	-1	1	20	114	133	CGACAGCUUCCUUGGAUUCC	::::: :::::::::::.:	UGAAUCAAAGGAAGCUGUUG	Cleavage	1
Cluster_1697	UCCAUUAUAAAGUCUGAAG	19	Medtr2g100000.2	| beta-like galactosidase | HC | chr2:42908368-42922742 | 20130731	1.5	-1	1	19	890	908	UCCAUUAUAAAGUCUGAAG	:::..::.:::::::::::	CUUUGGAUUUUAUAAUGGA	Cleavage	1
Cluster_1697	UCCAUUAUAAAGUCUGAAG	19	Medtr2g100000.1	| beta-like galactosidase | HC | chr2:42906588-42922742 | 20130731	1.5	-1	1	19	1094	1112	UCCAUUAUAAAGUCUGAAG	:::..::.:::::::::::	CUUUGGAUUUUAUAAUGGA	Cleavage	1
Cluster_1699	UAGCUUCUUUUAGUGGUGCGGCCU	24	Medtr4g131310.1	| XH/XS domain protein | HC | chr4:54778297-54775559 | 20130731	1.5	-1	1	24	1364	1387	UAGCUUCUUUUAGUGGUGCGGCCU	::: ::::::::::::.::	GGAAGGCAACACUAAAAGAAGUUA	Cleavage	1
Cluster_1699	UAGCUUCUUUUAGUGGUGCGGCCU	24	Medtr4g125920.1	| XH/XS domain protein | HC | chr4:52281801-52288038 | 20130731	1.5	-1	1	24	2002	2025	UAGCUUCUUUUAGUGGUGCGGCCU	::: ::::::::::::.::	GGAAGGCAACACUAAAAGAAGUUA	Cleavage	1
Cluster_1699	UAGCUUCUUUUAGUGGUGCGGCCU	24	Medtr4g131350.1	| XH/XS domain protein | HC | chr4:54788977-54795616 | 20130731	1.5	-1	1	24	1976	1999	UAGCUUCUUUUAGUGGUGCGGCCU	::: ::::::::::::.::	GGAAGGCAACACUAAAAGAAGUUA	Cleavage	1
Cluster_1699	UAGCUUCUUUUAGUGGUGCGGCCU	24	Medtr8g447310.1	| damaged DNA-binding; exodeoxyribonuclease IIIs protein | HC | chr8:18592798-18588589 | 20130731	1.5	-1	1	24	467	490	UAGCUUCUUUUAGUGGUGCGGCCU	:: :.::: :::::::.:::::::	AGUCUGCAGCACUAAAGGAAGCUA	Cleavage	1
Cluster_1701	UAGCCACUGUUGAUUAUUUGAUG	23	Medtr4g108350.1	| TB2/DP1, HVA22 family protein | HC | chr4:44946463-44944472 | 20130731	1.5	-1	1	23	392	414	UAGCCACUGUUGAUUAUUUGAUG	...::.::::::::::::::	CUGUGGAUGAUCAACAGUGGCUA	Cleavage	1
Cluster_1701	UAGCCACUGUUGAUUAUUUGAUG	23	Medtr4g108350.2	| TB2/DP1, HVA22 family protein | HC | chr4:44946463-44944474 | 20130731	1.5	-1	1	23	365	387	UAGCCACUGUUGAUUAUUUGAUG	...::.::::::::::::::	CUGUGGAUGAUCAACAGUGGCUA	Cleavage	1
Cluster_181	AGGACGAGAAGAAACUGAACAGG	23	Medtr4g107230.1	| MYB-like transcription factor family protein | HC | chr4:44299914-44302294 | 20130731	1.5	-1	1	23	1362	1384	AGGACGAGAAGAAACUGAACAGG	:::::::::::::::::.::..:	CCUGUUCAGUUUCUUCUUGUUUU	Cleavage	1
Cluster_1894	UAUCAAAGUAGAAUGGAAAG	20	Medtr3g087290.1	| hypothetical protein | HC | chr3:39573084-39573366 | 20130731	1.5	-1	1	20	202	221	UAUCAAAGUAGAAUGGAAAG	::.:::::::::::::::	GAUUUCAUUCUACUUUGAUA	Cleavage	1
Cluster_2010	UAAUUAGAUUCUUGAAUCGCCU	22	Medtr4g069800.2	| ATP-dependent Clp protease proteolytic protein | HC | chr4:26245605-26250350 | 20130731	1.5	-1	1	22	951	972	UAAUUAGAUUCUUGAAUCGCCU	.::::.:::::::::.:::	UUUUGAUUUAAGAAUCUAGUUA	Cleavage	1
Cluster_2010	UAAUUAGAUUCUUGAAUCGCCU	22	Medtr4g069800.1	| ATP-dependent Clp protease proteolytic protein | HC | chr4:26245523-26250401 | 20130731	1.5	-1	1	22	1129	1150	UAAUUAGAUUCUUGAAUCGCCU	.::::.:::::::::.:::	UUUUGAUUUAAGAAUCUAGUUA	Cleavage	1
Cluster_2042	UUUCUUCGUCUGUAAUAUGAUG	22	Medtr4g026030.1	| cytochrome P450 family 71 protein | HC | chr4:8952646-8955502 | 20130731	1.5	-1	1	22	322	343	UUUCUUCGUCUGUAAUAUGAUG	: :::::::::::.:::::..	GAACAUAUUACAGAUGAAGAGG	Cleavage	1
Cluster_2049	UAGAAGAUGAAUAUGGAUG	19	Medtr3g461500.1	| proteasome activator complex subunit-like protein | HC | chr3:24461019-24438343 | 20130731	1.5	-1	1	19	3424	3442	UAGAAGAUGAAUAUGGAUG	:::::: ::::::::::::	CAUCCAAAUUCAUCUUCUA	Cleavage	1
Cluster_2049	UAGAAGAUGAAUAUGGAUG	19	Medtr3g461520.1	| proteasome activator complex subunit-like protein | HC | chr3:24479182-24463573 | 20130731	1.5	-1	1	19	3460	3478	UAGAAGAUGAAUAUGGAUG	:::::: ::::::::::::	CAUCCAAAUUCAUCUUCUA	Cleavage	1
Cluster_2049	UAGAAGAUGAAUAUGGAUG	19	Medtr3g461520.2	| proteasome activator complex subunit-like protein | HC | chr3:24479182-24463573 | 20130731	1.5	-1	1	19	3460	3478	UAGAAGAUGAAUAUGGAUG	:::::: ::::::::::::	CAUCCAAAUUCAUCUUCUA	Cleavage	1
Cluster_2049	UAGAAGAUGAAUAUGGAUG	19	Medtr3g461520.3	| proteasome activator complex subunit-like protein | HC | chr3:24479182-24464019 | 20130731	1.5	-1	1	19	3460	3478	UAGAAGAUGAAUAUGGAUG	:::::: ::::::::::::	CAUCCAAAUUCAUCUUCUA	Cleavage	1
Cluster_206	UUUUCUUUCCUGCUAACGUUACU	23	Medtr1g099480.2	| P-loop nucleoside triphosphate hydrolase superfamily protein | HC | chr1:44931110-44935639 | 20130731	1.5	-1	1	23	1515	1537	UUUUCUUUCCUGCUAACGUUACU	:: .:.: :::::::::::::::	AGGGAUGAUAGCAGGAAAGAAAA	Cleavage	1
Cluster_206	UUUUCUUUCCUGCUAACGUUACU	23	Medtr1g099480.1	| P-loop nucleoside triphosphate hydrolase superfamily protein | HC | chr1:44931110-44937749 | 20130731	1.5	-1	1	23	1515	1537	UUUUCUUUCCUGCUAACGUUACU	:: .:.: :::::::::::::::	AGGGAUGAUAGCAGGAAAGAAAA	Cleavage	1
Cluster_207	UCAGUGAUUUUCUUAGGUCGGCCU	24	Medtr0265s0020.1	| hypothetical protein | LC | scaffold0265:5018-6379 | 20130731	1.5	-1	1	24	465	488	UCAGUGAUUUUCUUAGGUCGGCCU	::.:: ::::::::::::::::.	CGGUCGUCCUAAGAAAAUCACUGG	Cleavage	1
Cluster_207	UCAGUGAUUUUCUUAGGUCGGCCU	24	Medtr1g058950.1	| 26S proteasome regulatory subunit S2 1B | HC | chr1:21827213-21826405 | 20130731	1.5	-1	1	24	159	182	UCAGUGAUUUUCUUAGGUCGGCCU	::.:: ::::::::::::::::.	CGGUCGUCCUAAGAAAAUCACUGG	Cleavage	1
Cluster_207	UCAGUGAUUUUCUUAGGUCGGCCU	24	Medtr8g096030.1	| PPR containing plant-like protein | HC | chr8:40057307-40055314 | 20130731	1.5	-1	1	24	1640	1663	UCAGUGAUUUUCUUAGGUCGGCCU	:: :::::::::::::::.	UAGAAGAGCUAAGAAAAUCACUGG	Cleavage	1
Cluster_2080	UCUUGAUCUCUUUCCUUUUGGUACU	25	Medtr8g062830.1	| formin-like 2 domain protein | HC | chr8:26282122-26285210 | 20130731	1.5	-1	1	25	454	478	UCUUGAUCUCUUUCCUUUUGGUACU	:: :::: :::::::::::.::	UUUAAGAAAAAGAAAGAGAUCAGGA	Cleavage	1
Cluster_2080	UCUUGAUCUCUUUCCUUUUGGUACU	25	Medtr8g097220.1	| amidase C869.01-like protein, putative | HC | chr8:34899667-34896062 | 20130731	1.5	-1	1	25	980	1004	UCUUGAUCUCUUUCCUUUUGGUACU	: ::.::.:::::::::::.:.::	UGGACUAAGAGGAAAGAGAUUAGGA	Cleavage	1
Cluster_2080	UCUUGAUCUCUUUCCUUUUGGUACU	25	Medtr6g006790.1	| transmembrane protein, putative | LC | chr6:1210431-1210982 | 20130731	1.5	-1	1	25	167	191	UCUUGAUCUCUUUCCUUUUGGUACU	:.::::::.:.::::::::	AUAAGAAGAAGGAAGGGGAUCAAGA	Cleavage	1
Cluster_2080	UCUUGAUCUCUUUCCUUUUGGUACU	25	Medtr3g117550.1	| NADH ubiquinone oxidoreductase B22-like subunit | HC | chr3:55042637-55047135 | 20130731	1.5	-1	1	25	87	111	UCUUGAUCUCUUUCCUUUUGGUACU	::::::.:::::::..:::	AAGGAAAAAAGGGAAGAGAUUGAGA	Cleavage	1
Cluster_2080	UCUUGAUCUCUUUCCUUUUGGUACU	25	Medtr6g033615.1	| UDP-glucosyltransferase family protein | HC | chr6:10967520-10968902 | 20130731	1.5	-1	1	25	1234	1258	UCUUGAUCUCUUUCCUUUUGGUACU	.:::.::::::::::.:.::	UCCGAUAAAGGGAAAGAGAUUAGGA	Cleavage	1
Cluster_2080	UCUUGAUCUCUUUCCUUUUGGUACU	25	Medtr8g080840.1	| amidase C869.01-like protein, putative | HC | chr8:34913648-34909209 | 20130731	1.5	-1	1	25	1122	1146	UCUUGAUCUCUUUCCUUUUGGUACU	: ::.::.:::::::::::.:.::	CGGACUAAGAGGAAAGAGAUUAGGA	Cleavage	1
Cluster_2122	CAUUUUGCCGGCAUUUGAGA	20	Medtr5g009770.6	| cation/H+ exchanger 3 | HC | chr5:2441506-2446584 | 20130731	1.5	-1	1	20	1591	1610	CAUUUUGCCGGCAUUUGAGA	:::::::::::::.::::	AAUCAAAUGCCGGCAGAAUG	Cleavage	1
Cluster_2122	CAUUUUGCCGGCAUUUGAGA	20	Medtr5g009770.7	| cation/H+ exchanger 3 | HC | chr5:2441477-2446584 | 20130731	1.5	-1	1	20	1780	1799	CAUUUUGCCGGCAUUUGAGA	:::::::::::::.::::	AAUCAAAUGCCGGCAGAAUG	Cleavage	1
Cluster_2122	CAUUUUGCCGGCAUUUGAGA	20	Medtr5g009770.5	| cation/H+ exchanger 3 | HC | chr5:2441506-2446584 | 20130731	1.5	-1	1	20	725	744	CAUUUUGCCGGCAUUUGAGA	:::::::::::::.::::	AAUCAAAUGCCGGCAGAAUG	Cleavage	1
Cluster_2124	AGGCAAAGAACAAUGAUGAAAU	22	Medtr3g075320.2	| pectate lyase family protein | HC | chr3:34289712-34287043 | 20130731	1.5	-1	1	22	694	715	AGGCAAAGAACAAUGAUGAAAU	:: ::::::::::::::.::	GGUUGAUCAUUGUUCUUUGUCU	Cleavage	1
Cluster_2124	AGGCAAAGAACAAUGAUGAAAU	22	Medtr6g021950.1	| pectate lyase family protein | HC | chr6:7594941-7591413 | 20130731	1.5	-1	1	22	699	720	AGGCAAAGAACAAUGAUGAAAU	:: ::::::::::::::.::	GAUUGAUCAUUGUUCUUUGUCU	Cleavage	1
Cluster_2124	AGGCAAAGAACAAUGAUGAAAU	22	Medtr3g075320.1	| pectate lyase family protein | HC | chr3:34289715-34287040 | 20130731	1.5	-1	1	22	697	718	AGGCAAAGAACAAUGAUGAAAU	:: ::::::::::::::.::	GGUUGAUCAUUGUUCUUUGUCU	Cleavage	1
Cluster_2131	UAGCUUCUUUUAGUGGUGCGGCCU	24	Medtr4g131350.1	| XH/XS domain protein | HC | chr4:54788977-54795616 | 20130731	1.5	-1	1	24	1976	1999	UAGCUUCUUUUAGUGGUGCGGCCU	::: ::::::::::::.::	GGAAGGCAACACUAAAAGAAGUUA	Cleavage	1
Cluster_2131	UAGCUUCUUUUAGUGGUGCGGCCU	24	Medtr8g447310.1	| damaged DNA-binding; exodeoxyribonuclease IIIs protein | HC | chr8:18592798-18588589 | 20130731	1.5	-1	1	24	467	490	UAGCUUCUUUUAGUGGUGCGGCCU	:: :.::: :::::::.:::::::	AGUCUGCAGCACUAAAGGAAGCUA	Cleavage	1
Cluster_2131	UAGCUUCUUUUAGUGGUGCGGCCU	24	Medtr4g125920.1	| XH/XS domain protein | HC | chr4:52281801-52288038 | 20130731	1.5	-1	1	24	2002	2025	UAGCUUCUUUUAGUGGUGCGGCCU	::: ::::::::::::.::	GGAAGGCAACACUAAAAGAAGUUA	Cleavage	1
Cluster_2131	UAGCUUCUUUUAGUGGUGCGGCCU	24	Medtr4g131310.1	| XH/XS domain protein | HC | chr4:54778297-54775559 | 20130731	1.5	-1	1	24	1364	1387	UAGCUUCUUUUAGUGGUGCGGCCU	::: ::::::::::::.::	GGAAGGCAACACUAAAAGAAGUUA	Cleavage	1
Cluster_260	UUUUUGGAGUUGUGAGUUGGCU	22	Medtr1g081180.1	| trihelix transcription factor | HC | chr1:36129455-36127007 | 20130731	1.5	-1	1	22	211	232	UUUUUGGAGUUGUGAGUUGGCU	::::.:::.::::::::.::	CACCAAUUCAUAACUCCAAGAA	Cleavage	1
Cluster_261	UCAUCAUUAUCUGGGCAUG	19	Medtr6g407100.1	| LCR related | HC | chr6:1382815-1383222 | 20130731	1.5	-1	1	19	110	128	UCAUCAUUAUCUGGGCAUG	::::.::::.::.::::::	CAUGUCCAGGUAGUGAUGA	Cleavage	1
Cluster_261	UCAUCAUUAUCUGGGCAUG	19	Medtr6g407080.1	| LCR related | HC | chr6:1375067-1375474 | 20130731	1.5	-1	1	19	110	128	UCAUCAUUAUCUGGGCAUG	::::.::::.::.::::::	CAUGUCCAGGUAGUGAUGA	Cleavage	1
Cluster_263	GAGGAUCUUUCUGUGAUGG	19	Medtr7g111650.3	| meiotically up-regulated protein 71-like protein | HC | chr7:45841989-45835506 | 20130731	1.5	-1	1	19	1863	1881	GAGGAUCUUUCUGUGAUGG	::::::::::::::::.:	CCAUCACAGAAAGAUCUUG	Cleavage	1
Cluster_263	GAGGAUCUUUCUGUGAUGG	19	Medtr7g111650.4	| meiotically up-regulated protein 71-like protein | HC | chr7:45841976-45835553 | 20130731	1.5	-1	1	19	1817	1835	GAGGAUCUUUCUGUGAUGG	::::::::::::::::.:	CCAUCACAGAAAGAUCUUG	Cleavage	1
Cluster_263	GAGGAUCUUUCUGUGAUGG	19	Medtr7g111650.2	| meiotically up-regulated protein 71-like protein | HC | chr7:45841976-45835553 | 20130731	1.5	-1	1	19	1817	1835	GAGGAUCUUUCUGUGAUGG	::::::::::::::::.:	CCAUCACAGAAAGAUCUUG	Cleavage	1
Cluster_263	GAGGAUCUUUCUGUGAUGG	19	Medtr7g111650.1	| meiotically up-regulated protein 71-like protein | HC | chr7:45841976-45835553 | 20130731	1.5	-1	1	19	1850	1868	GAGGAUCUUUCUGUGAUGG	::::::::::::::::.:	CCAUCACAGAAAGAUCUUG	Cleavage	1
Cluster_263	GAGGAUCUUUCUGUGAUGG	19	Medtr7g111650.5	| meiotically up-regulated protein 71-like protein | HC | chr7:45841977-45835506 | 20130731	1.5	-1	1	19	1847	1865	GAGGAUCUUUCUGUGAUGG	::::::::::::::::.:	CCAUCACAGAAAGAUCUUG	Cleavage	1
Cluster_27	UUUUAUUAUCUGAACUUUGUACC	23	Medtr5g071540.1	| RNA-binding (RRM/RBD/RNP motif) family protein | HC | chr5:30368066-30365046 | 20130731	1.5	-1	1	23	534	556	UUUUAUUAUCUGAACUUUGUACC	:::: :::::::::::::.	UGAUCAAAUUUCAGAUAAUAAAG	Cleavage	1
Cluster_27	UUUUAUUAUCUGAACUUUGUACC	23	Medtr7g105200.1	| vacuolar protein sorting 55 protein | HC | chr7:42650952-42649483 | 20130731	1.5	-1	1	23	113	135	UUUUAUUAUCUGAACUUUGUACC	: ::::::::: :::::::::	CCUUCAAAGUUCAAAUAAUAAAA	Translation	1
Cluster_347	UCCUCCUCCAAAUUCUGAACU	21	Medtr8g471150.1	| basic helix loop helix protein, putative | HC | chr8:28762436-28766018 | 20130731	1.5	-1	1	21	636	656	UCCUCCUCCAAAUUCUGAACU	::::::: :::::::::::	GUUUCAGAAGUUGGAGGAGGA	Cleavage	1
Cluster_374	UAGUGGAACUGAUGUUGAAG	20	Medtr8g098995.2	| hypothetical protein | HC | chr8:41511525-41516950 | 20130731	1.5	-1	1	20	1964	1983	UAGUGGAACUGAUGUUGAAG	:::::::.::::::.::::.	CUUCAACGUCAGUUUCACUG	Cleavage	1
Cluster_374	UAGUGGAACUGAUGUUGAAG	20	Medtr8g098995.1	| hypothetical protein | HC | chr8:41512904-41516625 | 20130731	1.5	-1	1	20	1529	1548	UAGUGGAACUGAUGUUGAAG	:::::::.::::::.::::.	CUUCAACGUCAGUUUCACUG	Cleavage	1
Cluster_42	UGAUGGAGAACUUCUGCCU	19	Medtr5g045370.1	| ninja-family protein AFP1 | HC | chr5:19912802-19918237 | 20130731	1.5	-1	1	19	714	732	UGAUGGAGAACUUCUGCCU	:::..::::::::.:::::	AGGUGGAAGUUCUUCAUCA	Cleavage	1
Cluster_433	UUUUGGUAGAAUCUGGUUUACC	22	Medtr7g006900.2	| cytochrome P450 family protein | HC | chr7:1265616-1268718 | 20130731	1.5	-1	1	22	1556	1577	UUUUGGUAGAAUCUGGUUUACC	:: :::::::::::.:::::	AAUACACCAGAUUCUAUCAAAA	Cleavage	1
Cluster_433	UUUUGGUAGAAUCUGGUUUACC	22	Medtr4g094550.1	| stress up-regulated Nod 19 protein | HC | chr4:38222122-38219238 | 20130731	1.5	-1	1	22	1150	1171	UUUUGGUAGAAUCUGGUUUACC	::::::::.:::::.:::.:	CCUAAACCAGGUUCUAUCAAGA	Cleavage	1
Cluster_433	UUUUGGUAGAAUCUGGUUUACC	22	Medtr2g030470.1	| stress up-regulated Nod 19 protein | LC | chr2:11471036-11480994 | 20130731	1.5	-1	1	22	1176	1197	UUUUGGUAGAAUCUGGUUUACC	::::::::.:::::.:::.:	CCUAAACCAGGUUCUAUCAAGA	Cleavage	2
Cluster_433	UUUUGGUAGAAUCUGGUUUACC	22	Medtr2g030480.1	| stress up-regulated Nod 19 protein | LC | chr2:11484809-11486640 | 20130731	1.5	-1	1	22	1036	1057	UUUUGGUAGAAUCUGGUUUACC	::::::::.:::::.:::.:	CCUAAACCAGGUUCUAUCAAGA	Cleavage	1
Cluster_437	GAGUAACGUCUAUAAUGUUGGCU	23	Medtr5g026200.1	| LRR receptor-like kinase family protein | LC | chr5:10765586-10761823 | 20130731	1.5	-1	1	23	2541	2563	GAGUAACGUCUAUAAUGUUGGCU	::.:::::.::.:::::::	AAUGAAUAUUAUGGAUGUUACUC	Cleavage	1
Cluster_445	UUAUAUGAUUGCUGAAAAAUGG	22	Medtr8g045000.1	| hypothetical protein | LC | chr8:17047524-17042989 | 20130731	1.5	-1	1	22	858	879	UUAUAUGAUUGCUGAAAAAUGG	:::::::::::::::: ::	GGCUUUUUCAGCAAUCAUAGAA	Cleavage	1
Cluster_477	AAAGUGAACACAAAGAACAAACU	23	Medtr8g095360.1	| patellin-3 protein | HC | chr8:39892589-39895703 | 20130731	1.5	-1	1	23	1793	1815	AAAGUGAACACAAAGAACAAACU	: : :::::::::::: ::::::	AUUAUGUUCUUUGUGUCCACUUU	Cleavage	1
Cluster_485	ACGUUAGAAUUAUCGAAAGCCU	22	Medtr5g074360.1	| cation/H+ exchanger 2 | LC | chr5:31596719-31593337 | 20130731	1.5	-1	1	22	844	865	ACGUUAGAAUUAUCGAAAGCCU	::::::.:::::.:::.::	GUACUUUCGGUAAUUUUAAUGU	Cleavage	1
Cluster_541	UGAGAGAAUCUUUGGUAAG	19	Medtr7g029450.1	| phosphoribulokinase/uridine kinase | HC | chr7:10536309-10543432 | 20130731	1.5	-1	1	19	231	249	UGAGAGAAUCUUUGGUAAG	:::::::::::::::::.	CUUACCAAAGAUUCUCUUC	Cleavage	1
Cluster_551	UCAACAUUGAUCAACUUAGAACAA	24	Medtr3g110050.1	| raffinose synthase or seed inhibition protein | LC | chr3:50917435-50917704 | 20130731	1.5	-1	1	24	111	134	UCAACAUUGAUCAACUUAGAACAA	::: .:.:::::::.::::::::	UUGGCUUGAGUUGAUUAAUGUUGA	Cleavage	1
Cluster_574	GAAUGAAUUUGAUUGUGAAGAU	22	Medtr2g069920.1	| hypothetical protein | HC | chr2:29273546-29277044 | 20130731	1.5	-1	1	22	21	42	GAAUGAAUUUGAUUGUGAAGAU	:::::::::::::::..::.	UCCUUCACAAUCAAAUUUGUUU	Cleavage	1
Cluster_597	UUUUCUUUCUGACUGUAAUAGU	22	Medtr1g069610.1	| hypothetical protein | HC | chr1:30263456-30261145 | 20130731	1.5	-1	1	22	424	445	UUUUCUUUCUGACUGUAAUAGU	: :.:::::::.:::::::::.	AGUGUUACAGUUAGAAAGAAAG	Cleavage	1
Cluster_598	UAAUUGGAUUCUUGAAUCGCCU	22	Medtr8g040730.1	| sulfotransferase | HC | chr8:15172205-15168737 | 20130731	1.5	-1	1	22	1418	1439	UAAUUGGAUUCUUGAAUCGCCU	:: ::::::::::.::.::::.	AGUCGAUUCAAGAGUCUAAUUG	Cleavage	2
Cluster_607	UAGCUUCUUUUAGUGGUGCGGCCU	24	Medtr4g131350.1	| XH/XS domain protein | HC | chr4:54788977-54795616 | 20130731	1.5	-1	1	24	1976	1999	UAGCUUCUUUUAGUGGUGCGGCCU	::: ::::::::::::.::	GGAAGGCAACACUAAAAGAAGUUA	Cleavage	1
Cluster_607	UAGCUUCUUUUAGUGGUGCGGCCU	24	Medtr4g125920.1	| XH/XS domain protein | HC | chr4:52281801-52288038 | 20130731	1.5	-1	1	24	2002	2025	UAGCUUCUUUUAGUGGUGCGGCCU	::: ::::::::::::.::	GGAAGGCAACACUAAAAGAAGUUA	Cleavage	1
Cluster_607	UAGCUUCUUUUAGUGGUGCGGCCU	24	Medtr8g447310.1	| damaged DNA-binding; exodeoxyribonuclease IIIs protein | HC | chr8:18592798-18588589 | 20130731	1.5	-1	1	24	467	490	UAGCUUCUUUUAGUGGUGCGGCCU	:: :.::: :::::::.:::::::	AGUCUGCAGCACUAAAGGAAGCUA	Cleavage	1
Cluster_607	UAGCUUCUUUUAGUGGUGCGGCCU	24	Medtr4g131310.1	| XH/XS domain protein | HC | chr4:54778297-54775559 | 20130731	1.5	-1	1	24	1364	1387	UAGCUUCUUUUAGUGGUGCGGCCU	::: ::::::::::::.::	GGAAGGCAACACUAAAAGAAGUUA	Cleavage	1
Cluster_623	UCUCAUAAGAGAUCUUGGAAGGACC	25	Medtr5g009990.1	| meiotic recombination SPO11-like protein | HC | chr5:2567904-2571533 | 20130731	1.5	-1	1	25	243	267	UCUCAUAAGAGAUCUUGGAAGGACC	:: . : ::::.::::::::::::	UGUAUCUACAAGGUCUCUUAUGAGA	Cleavage	1
Cluster_64	UGGCAUCUUGAGAACUUUUAGCA	23	Medtr1g105970.1	| tubulin alpha-6 chain, putative | HC | chr1:47891638-47894761 | 20130731	1.5	-1	1	23	345	367	UGGCAUCUUGAGAACUUUUAGCA	::. ::::::::::::::::	UUGUAGUAGUUCUCAAGAUGCCA	Cleavage	1
Cluster_65	UAAUUAGUUUUGAUUUGAUGCCU	23	Medtr7g101830.1	| elongation factor Tu GTP-binding domain protein | LC | chr7:41061415-41063669 | 20130731	1.5	-1	1	23	744	766	UAAUUAGUUUUGAUUUGAUGCCU	:: .:::::::::.::.:.::::	AGAUAUCAAAUCAGAAUUGAUUA	Cleavage	1
Cluster_656	AUUUGAAGAAAGAACUUGCAAUGCC	25	Medtr3g012240.2	| disease resistance protein (CC-NBS-LRR class) family protein | HC | chr3:3304734-3296543 | 20130731	1.5	-1	1	25	3184	3208	AUUUGAAGAAAGAACUUGCAAUGCC	:::: :::.:::::::::::	UAGUGUGCAUGUUUUUUCUUCAAAU	Cleavage	1
Cluster_656	AUUUGAAGAAAGAACUUGCAAUGCC	25	Medtr4g073540.1	| subtilisin-like serine protease | HC | chr4:27885510-27882715 | 20130731	1.5	-1	1	25	187	211	AUUUGAAGAAAGAACUUGCAAUGCC	:::::::::::::::.::	CCUAAACCAAGUUCUUUCUUCAGAU	Cleavage	1
Cluster_717	CUGAAGAGAUAAAUGAUGAAU	21	Medtr1g047740.4	| CHY and CTCHY and RING-type zinc finger protein | HC | chr1:18053590-18048093 | 20130731	1.5	-1	1	21	3034	3054	CUGAAGAGAUAAAUGAUGAAU	:::.::::::::::::::::	AUUUAUCAUUUAUCUCUUCAU	Cleavage	1
Cluster_717	CUGAAGAGAUAAAUGAUGAAU	21	Medtr1g047740.2	| CHY and CTCHY and RING-type zinc finger protein | HC | chr1:18053590-18048093 | 20130731	1.5	-1	1	21	2949	2969	CUGAAGAGAUAAAUGAUGAAU	:::.::::::::::::::::	AUUUAUCAUUUAUCUCUUCAU	Cleavage	1
Cluster_717	CUGAAGAGAUAAAUGAUGAAU	21	Medtr1g047740.1	| CHY and CTCHY and RING-type zinc finger protein | HC | chr1:18053590-18048093 | 20130731	1.5	-1	1	21	2938	2958	CUGAAGAGAUAAAUGAUGAAU	:::.::::::::::::::::	AUUUAUCAUUUAUCUCUUCAU	Cleavage	1
Cluster_717	CUGAAGAGAUAAAUGAUGAAU	21	Medtr1g047740.3	| CHY and CTCHY and RING-type zinc finger protein | HC | chr1:18053590-18048093 | 20130731	1.5	-1	1	21	3014	3034	CUGAAGAGAUAAAUGAUGAAU	:::.::::::::::::::::	AUUUAUCAUUUAUCUCUUCAU	Cleavage	1
Cluster_717	CUGAAGAGAUAAAUGAUGAAU	21	Medtr1g047740.5	| CHY and CTCHY and RING-type zinc finger protein | HC | chr1:18053590-18048093 | 20130731	1.5	-1	1	21	3045	3065	CUGAAGAGAUAAAUGAUGAAU	:::.::::::::::::::::	AUUUAUCAUUUAUCUCUUCAU	Cleavage	1
Cluster_717	CUGAAGAGAUAAAUGAUGAAU	21	Medtr1g047740.6	| CHY and CTCHY and RING-type zinc finger protein | HC | chr1:18053590-18048093 | 20130731	1.5	-1	1	21	3110	3130	CUGAAGAGAUAAAUGAUGAAU	:::.::::::::::::::::	AUUUAUCAUUUAUCUCUUCAU	Cleavage	1
Cluster_766	ACGACCGAGAACUUUUUCUGAU	22	Medtr2g036510.1	| galactose oxidase/kelch repeat protein | HC | chr2:15805460-15796841 | 20130731	1.5	-1	1	22	506	527	ACGACCGAGAACUUUUUCUGAU	: :::.::::::::::::::	CGCUGAAGAAGUUCUCGGUCGU	Cleavage	1
Cluster_817	UACUCCCUCAACCUAGACACAUGA	24	Medtr6g038090.1	| disease resistance protein (TIR-NBS-LRR class), putative | LC | chr6:13607999-13615713 | 20130731	1.5	-1	1	24	896	919	UACUCCCUCAACCUAGACACAUGA	:::::::::: ::::::::	GAGAAUGUCUAGGUUCAGGGAGUA	Cleavage	1
Cluster_819	UUCUUUGGCCUUUCCCUUG	19	Medtr5g052190.1	| hydrolase of sodium-potassium ATPase alpha subunit, putative | LC | chr5:21848683-21845598 | 20130731	1.5	-1	1	19	1079	1097	UUCUUUGGCCUUUCCCUUG	:::::::::::...:::::	CAAGGGAAAGGUUGAAGAA	Cleavage	1
Cluster_832	UUUUCUUCAUCUUCCUCCUCG	21	Medtr7g031450.1	| tplate-like protein | HC | chr7:10966724-10958207 | 20130731	1.5	-1	1	21	3283	3303	UUUUCUUCAUCUUCCUCCUCG	::: :::::::::::::::.:	CGACGAGGAAGAUGAAGAAGA	Cleavage	1
Cluster_832	UUUUCUUCAUCUUCCUCCUCG	21	Medtr2g036920.2	| DUF630 family protein | LC | chr2:16026194-16020715 | 20130731	1.5	-1	1	21	1629	1649	UUUUCUUCAUCUUCCUCCUCG	.:.::::::.:::::::::.:	UGGGGAGGAGGAUGAAGAAGA	Cleavage	1
Cluster_832	UUUUCUUCAUCUUCCUCCUCG	21	Medtr2g036920.1	| DUF630 family protein | LC | chr2:16026164-16020759 | 20130731	1.5	-1	1	21	1512	1532	UUUUCUUCAUCUUCCUCCUCG	.:.::::::.:::::::::.:	UGGGGAGGAGGAUGAAGAAGA	Cleavage	1
Cluster_832	UUUUCUUCAUCUUCCUCCUCG	21	Medtr8g077860.1	| hypothetical protein | HC | chr8:33154020-33149706 | 20130731	1.5	-1	1	21	882	902	UUUUCUUCAUCUUCCUCCUCG	.::::::::::::::.::..:	UGAGGAGGAAGAUGAGGAGGA	Cleavage	1
Cluster_832	UUUUCUUCAUCUUCCUCCUCG	21	Medtr8g077860.2	| hypothetical protein | HC | chr8:33154020-33149706 | 20130731	1.5	-1	1	21	882	902	UUUUCUUCAUCUUCCUCCUCG	.::::::::::::::.::..:	UGAGGAGGAAGAUGAGGAGGA	Cleavage	1
Cluster_832	UUUUCUUCAUCUUCCUCCUCG	21	Medtr4g115890.1	| hypothetical protein | HC | chr4:47890024-47888141 | 20130731	1.5	-1	1	21	566	586	UUUUCUUCAUCUUCCUCCUCG	::: :::::::::::::::.:	CGAUGAGGAAGAUGAAGAAGA	Cleavage	1
Cluster_832	UUUUCUUCAUCUUCCUCCUCG	21	Medtr8g107730.1	| hypothetical protein | HC | chr8:45552432-45548426 | 20130731	1.5	-1	1	21	865	885	UUUUCUUCAUCUUCCUCCUCG	::::::::.:.::.::::::	AGAGGAGGAGGGUGGAGAAAA	Cleavage	1
Cluster_832	UUUUCUUCAUCUUCCUCCUCG	21	Medtr8g107730.2	| hypothetical protein | HC | chr8:45551520-45548426 | 20130731	1.5	-1	1	21	644	664	UUUUCUUCAUCUUCCUCCUCG	::::::::.:.::.::::::	AGAGGAGGAGGGUGGAGAAAA	Cleavage	1
Cluster_832	UUUUCUUCAUCUUCCUCCUCG	21	Medtr3g466820.1	| insulin-degrading enzyme | HC | chr3:27516028-27503943 | 20130731	1.5	-1	1	21	475	495	UUUUCUUCAUCUUCCUCCUCG	::::: ::::::::::::.:	AGAGGAUGAAGAUGAAGAAGA	Cleavage	2
Cluster_832	UUUUCUUCAUCUUCCUCCUCG	21	Medtr5g082880.1	| Pmr5/Cas1p GDSL/SGNH-like acyl-esterase family protein | HC | chr5:35687660-35691318 | 20130731	1.5	-1	1	21	756	776	UUUUCUUCAUCUUCCUCCUCG	::::: ::::::::::::.:	AGAGGAAGAAGAUGAAGAAGA	Cleavage	1
Cluster_832	UUUUCUUCAUCUUCCUCCUCG	21	Medtr8g026680.1	| Rac GTPase activating protein | HC | chr8:9249397-9245785 | 20130731	1.5	-1	1	21	508	528	UUUUCUUCAUCUUCCUCCUCG	::::: ::::::::::::.:	AGAGGAAGAAGAUGAAGAAGA	Cleavage	1
Cluster_832	UUUUCUUCAUCUUCCUCCUCG	21	Medtr4g116545.2	| class II knotted-like homeobox protein | HC | chr4:48287117-48281416 | 20130731	1.5	-1	1	21	300	320	UUUUCUUCAUCUUCCUCCUCG	:: ::::::::::::::::.	AGAAGAGGAAGAUGAAGAAAG	Cleavage	1
Cluster_832	UUUUCUUCAUCUUCCUCCUCG	21	Medtr4g116545.1	| class II knotted-like homeobox protein | HC | chr4:48287145-48281416 | 20130731	1.5	-1	1	21	328	348	UUUUCUUCAUCUUCCUCCUCG	:: ::::::::::::::::.	AGAAGAGGAAGAUGAAGAAAG	Cleavage	1
Cluster_832	UUUUCUUCAUCUUCCUCCUCG	21	Medtr5g045370.1	| ninja-family protein AFP1 | HC | chr5:19912802-19918237 | 20130731	1.5	-1	1	21	138	158	UUUUCUUCAUCUUCCUCCUCG	:: :::::::::::::::.:	AGAAGAGGAAGAUGAAGAAGA	Cleavage	1
Cluster_832	UUUUCUUCAUCUUCCUCCUCG	21	Medtr1g083860.1	| DUF1645 family protein | HC | chr1:37352030-37354647 | 20130731	1.5	-1	1	21	426	446	UUUUCUUCAUCUUCCUCCUCG	::::: ::::::::::::.:	AGAGGAAGAAGAUGAAGAAGA	Cleavage	1
Cluster_832	UUUUCUUCAUCUUCCUCCUCG	21	Medtr7g015190.3	| NLI interacting factor-like phosphatase | LC | chr7:4609245-4604070 | 20130731	1.5	-1	1	21	238	258	UUUUCUUCAUCUUCCUCCUCG	::::: ::::::::::::.:	AGAGGAAGAAGAUGAAGAAGA	Cleavage	1
Cluster_832	UUUUCUUCAUCUUCCUCCUCG	21	Medtr7g015190.4	| NLI interacting factor-like phosphatase | LC | chr7:4609231-4604070 | 20130731	1.5	-1	1	21	224	244	UUUUCUUCAUCUUCCUCCUCG	::::: ::::::::::::.:	AGAGGAAGAAGAUGAAGAAGA	Cleavage	1
Cluster_832	UUUUCUUCAUCUUCCUCCUCG	21	Medtr7g015190.2	| NLI interacting factor-like phosphatase | LC | chr7:4609245-4604070 | 20130731	1.5	-1	1	21	238	258	UUUUCUUCAUCUUCCUCCUCG	::::: ::::::::::::.:	AGAGGAAGAAGAUGAAGAAGA	Cleavage	1
Cluster_832	UUUUCUUCAUCUUCCUCCUCG	21	Medtr3g023230.1	| hypothetical protein | LC | chr3:7026649-7022204 | 20130731	1.5	-1	1	21	450	470	UUUUCUUCAUCUUCCUCCUCG	::::: :::::::::::::.	GGAGGAAGAAGAUGAAGAAAG	Cleavage	1
Cluster_832	UUUUCUUCAUCUUCCUCCUCG	21	Medtr1g069865.1	| hypothetical protein | LC | chr1:30553406-30548825 | 20130731	1.5	-1	1	21	495	515	UUUUCUUCAUCUUCCUCCUCG	:.::: ::::::::::::::	GGGGGAAGAAGAUGAAGAAAA	Cleavage	1
Cluster_832	UUUUCUUCAUCUUCCUCCUCG	21	Medtr1g007920.1	| IQ calmodulin-binding motif protein | HC | chr1:627735-623232 | 20130731	1.5	-1	1	21	836	856	UUUUCUUCAUCUUCCUCCUCG	::::::::::::::::.:	AAUGGAGGAAGAUGAAGAAGA	Cleavage	1
Cluster_832	UUUUCUUCAUCUUCCUCCUCG	21	Medtr1g007920.2	| IQ calmodulin-binding motif protein | HC | chr1:627150-623265 | 20130731	1.5	-1	1	21	510	530	UUUUCUUCAUCUUCCUCCUCG	::::::::::::::::.:	AAUGGAGGAAGAUGAAGAAGA	Cleavage	1
Cluster_832	UUUUCUUCAUCUUCCUCCUCG	21	Medtr1g103400.2	| vicilin 47 kDa protein | HC | chr1:46807938-46810830 | 20130731	1.5	-1	1	21	250	270	UUUUCUUCAUCUUCCUCCUCG	.::::::::::::.:::.:	AAGGGAGGAAGAUGAGGAAGA	Cleavage	1
Cluster_832	UUUUCUUCAUCUUCCUCCUCG	21	Medtr1g103400.1	| vicilin 47 kDa protein | HC | chr1:46807938-46810830 | 20130731	1.5	-1	1	21	250	270	UUUUCUUCAUCUUCCUCCUCG	.::::::::::::.:::.:	AAGGGAGGAAGAUGAGGAAGA	Cleavage	1
Cluster_832	UUUUCUUCAUCUUCCUCCUCG	21	Medtr7g007890.1	| apoptosis antagonizing transcription factor | HC | chr7:1740066-1747241 | 20130731	1.5	-1	1	21	280	300	UUUUCUUCAUCUUCCUCCUCG	::::::::::::.:::..:	GAAGGAGGAAGAUGGAGAGGA	Cleavage	1
Cluster_832	UUUUCUUCAUCUUCCUCCUCG	21	Medtr3g113110.1	| ATP-binding microtubule motor family protein | LC | chr3:52843767-52851675 | 20130731	1.5	-1	1	21	4872	4892	UUUUCUUCAUCUUCCUCCUCG	:::: :.::::::::::::	GAAGGAAGGAGAUGAAGAAAA	Cleavage	1
Cluster_861	UAAACAAUAGUCUGAGACAAU	21	Medtr4g124670.3	| CAAX amino terminal protease family protein | HC | chr4:51674518-51657668 | 20130731	1.5	-1	1	21	6934	6954	UAAACAAUAGUCUGAGACAAU	.::::.::::.::.:::::::	GUUGUUUCAGGCUGUUGUUUA	Cleavage	1
Cluster_861	UAAACAAUAGUCUGAGACAAU	21	Medtr4g124670.1	| CAAX amino terminal protease family protein | HC | chr4:51674521-51657732 | 20130731	1.5	-1	1	21	6666	6686	UAAACAAUAGUCUGAGACAAU	.::::.::::.::.:::::::	GUUGUUUCAGGCUGUUGUUUA	Cleavage	1
Cluster_861	UAAACAAUAGUCUGAGACAAU	21	Medtr4g124670.2	| CAAX amino terminal protease family protein | HC | chr4:51674292-51657668 | 20130731	1.5	-1	1	21	6487	6507	UAAACAAUAGUCUGAGACAAU	.::::.::::.::.:::::::	GUUGUUUCAGGCUGUUGUUUA	Cleavage	1
Cluster_861	UAAACAAUAGUCUGAGACAAU	21	Medtr4g124670.4	| CAAX amino terminal protease family protein | HC | chr4:51674521-51657619 | 20130731	1.5	-1	1	21	6513	6533	UAAACAAUAGUCUGAGACAAU	.::::.::::.::.:::::::	GUUGUUUCAGGCUGUUGUUUA	Cleavage	1
Cluster_875	UCUCCUAACAUACUGUACACCUC	23	Medtr4g063940.1	| kinase 1B | HC | chr4:23827198-23830027 | 20130731	1.5	-1	1	23	397	419	UCUCCUAACAUACUGUACACCUC	::: :::::.::::::::::	CGUGUGGACAGUGUGUUAGGAGA	Cleavage	1
Cluster_875	UCUCCUAACAUACUGUACACCUC	23	Medtr4g063940.2	| kinase 1B | HC | chr4:23827399-23830027 | 20130731	1.5	-1	1	23	340	362	UCUCCUAACAUACUGUACACCUC	::: :::::.::::::::::	CGUGUGGACAGUGUGUUAGGAGA	Cleavage	1
Cluster_887	UUUUCUUAUGUUUGGUGGAGGA	22	Medtr8g471170.1	| Copia-like polyprotein/retrotransposon, putative | LC | chr8:28772839-28771828 | 20130731	1.5	-1	1	22	130	151	UUUUCUUAUGUUUGGUGGAGGA	.:::::.::::.::.::::::	CUCUCCAUCAAAUAUGAGAAAA	Cleavage	1
Cluster_887	UUUUCUUAUGUUUGGUGGAGGA	22	Medtr4g105590.3	| Mpp10 protein | HC | chr4:43839987-43834079 | 20130731	1.5	-1	1	22	920	941	UUUUCUUAUGUUUGGUGGAGGA	::::::::::: :::::::	GAAUCCACCAAACAGAAGAAAA	Cleavage	1
Cluster_887	UUUUCUUAUGUUUGGUGGAGGA	22	Medtr4g105590.1	| Mpp10 protein | HC | chr4:43840004-43834079 | 20130731	1.5	-1	1	22	937	958	UUUUCUUAUGUUUGGUGGAGGA	::::::::::: :::::::	GAAUCCACCAAACAGAAGAAAA	Cleavage	1
Cluster_906	UCAAGAACAGGACUGCGCACAUGCC	25	Medtr6g027180.1	| RNA polymerase II-binding domain protein | HC | chr6:9201234-9212785 | 20130731	1.5	-1	1	25	2057	2081	UCAAGAACAGGACUGCGCACAUGCC	::::::.:..:::::::::::::	UUCAUGUGUGUGGUCCUGUUCUUGA	Cleavage	1
Cluster_906	UCAAGAACAGGACUGCGCACAUGCC	25	Medtr6g027180.2	| RNA polymerase II-binding domain protein | HC | chr6:9202019-9212786 | 20130731	1.5	-1	1	25	2735	2759	UCAAGAACAGGACUGCGCACAUGCC	::::::.:..:::::::::::::	UUCAUGUGUGUGGUCCUGUUCUUGA	Cleavage	1
Cluster_94	UCGCCAUCUUUUUCCAAAAA	20	Medtr4g017485.1	| hypothetical protein | HC | chr4:5464235-5463564 | 20130731	1.5	-1	1	20	523	542	UCGCCAUCUUUUUCCAAAAA	::::::::::.:.:::.::	GUUUUGGAAAAGGGUGGUGA	Cleavage	1
Cluster_947	UGAACAAGUUCAGAUCCGGCCU	22	Medtr4g094270.1	| 26S proteasome regulatory particle triple-A ATPase protein | HC | chr4:37587742-37582244 | 20130731	1.5	-1	1	22	833	854	UGAACAAGUUCAGAUCCGGCCU	: :.:: ::::::::::::::	UGUCUGGUUCUGAACUUGUUCA	Cleavage	1
Cluster_959	UUGCCAUGUAGUCCUUGAAGGAGA	24	Medtr6g012500.1	| pollen allergen protein | LC | chr6:3804518-3803334 | 20130731	1.5	-1	1	24	655	678	UUGCCAUGUAGUCCUUGAAGGAGA	::::::::::: :::::::	AAAGGUUCAAGGACUAGAUGGCAA	Cleavage	1
Cluster_959	UUGCCAUGUAGUCCUUGAAGGAGA	24	Medtr6g012520.1	| expansin A10 | HC | chr6:3815849-3813982 | 20130731	1.5	-1	1	24	541	564	UUGCCAUGUAGUCCUUGAAGGAGA	::::::::::: :::::::	AAAGGUUCAAGGACUAGAUGGCAA	Cleavage	1
Cluster_1000	UAAUCAAACCAUACCAUCAGCACC	24	Medtr5g044770.1	| eukaryotic aspartyl protease family protein | LC | chr5:19650051-19648695 | 20130731	2	-1	1	24	1211	1234	UAAUCAAACCAUACCAUCAGCACC	: ::::::::::.::::::: :::	GUUGCUGAUGGUGUGGUUUGCUUA	Cleavage	1
Cluster_104	UGUUCUUAAAGGUGGUAACUUCGC	24	Medtr4g036240.2	| replication factor-A carboxy-terminal domain protein | HC | chr4:11830210-11833873 | 20130731	2	-1	1	24	790	813	UGUUCUUAAAGGUGGUAACUUCGC	.::.: :::..::::::::::::	UUGAGGGUACUGCCUUUAAGAACA	Cleavage	1
Cluster_104	UGUUCUUAAAGGUGGUAACUUCGC	24	Medtr4g036240.3	| replication factor-A carboxy-terminal domain protein | HC | chr4:11830210-11833873 | 20130731	2	-1	1	24	522	545	UGUUCUUAAAGGUGGUAACUUCGC	.::.: :::..::::::::::::	UUGAGGGUACUGCCUUUAAGAACA	Cleavage	1
Cluster_104	UGUUCUUAAAGGUGGUAACUUCGC	24	Medtr4g036240.1	| replication factor-A carboxy-terminal domain protein | HC | chr4:11830642-11833873 | 20130731	2	-1	1	24	698	721	UGUUCUUAAAGGUGGUAACUUCGC	.::.: :::..::::::::::::	UUGAGGGUACUGCCUUUAAGAACA	Cleavage	1
Cluster_104	UGUUCUUAAAGGUGGUAACUUCGC	24	Medtr3g056270.1	| replication factor-A carboxy-terminal domain protein | HC | chr3:22409504-22413525 | 20130731	2	-1	1	24	1175	1198	UGUUCUUAAAGGUGGUAACUUCGC	.::.: :::..::::::::::::	CUGAGGGUACUGCCUUUAAGAACA	Cleavage	1
Cluster_1054	UUUUAUUAUGUUUGGUGGAGG	21	Medtr7g072330.1	| regulatory-associated protein of TOR protein | HC | chr7:26871392-26857318 | 20130731	2	-1	1	21	652	672	UUUUAUUAUGUUUGGUGGAGG	:::::::.:..:::::::.	GAUCCACCAGAUGUAAUAAAG	Cleavage	1
Cluster_1054	UUUUAUUAUGUUUGGUGGAGG	21	Medtr1g037010.2	| NBS-LRR type disease resistance protein | LC | chr1:13607004-13616185 | 20130731	2	-1	1	21	4504	4524	UUUUAUUAUGUUUGGUGGAGG	..::::.::::..::::.:::	UUUCCAUCAAAUGUAAUGAAA	Cleavage	1
Cluster_1054	UUUUAUUAUGUUUGGUGGAGG	21	Medtr1g037010.3	| NBS-LRR type disease resistance protein | LC | chr1:13607004-13616185 | 20130731	2	-1	1	21	4504	4524	UUUUAUUAUGUUUGGUGGAGG	..::::.::::..::::.:::	UUUCCAUCAAAUGUAAUGAAA	Cleavage	1
Cluster_1054	UUUUAUUAUGUUUGGUGGAGG	21	Medtr4g127130.2	| choline monooxygenase | HC | chr4:52734192-52738899 | 20130731	2	-1	1	21	1634	1654	UUUUAUUAUGUUUGGUGGAGG	..:: :.:::::::::::::.	UUUCAAUCAAACAUAAUAAAG	Cleavage	1
Cluster_1054	UUUUAUUAUGUUUGGUGGAGG	21	Medtr4g127130.1	| choline monooxygenase | HC | chr4:52734192-52738891 | 20130731	2	-1	1	21	1500	1520	UUUUAUUAUGUUUGGUGGAGG	..:: :.:::::::::::::.	UUUCAAUCAAACAUAAUAAAG	Cleavage	1
Cluster_1054	UUUUAUUAUGUUUGGUGGAGG	21	Medtr1g037010.1	| NBS-LRR type disease resistance protein | LC | chr1:13607004-13616185 | 20130731	2	-1	1	21	4504	4524	UUUUAUUAUGUUUGGUGGAGG	..::::.::::..::::.:::	UUUCCAUCAAAUGUAAUGAAA	Cleavage	1
Cluster_1054	UUUUAUUAUGUUUGGUGGAGG	21	Medtr7g072330.2	| regulatory-associated protein of TOR protein | HC | chr7:26871392-26857318 | 20130731	2	-1	1	21	652	672	UUUUAUUAUGUUUGGUGGAGG	:::::::.:..:::::::.	GAUCCACCAGAUGUAAUAAAG	Cleavage	1
Cluster_1058	AAGGAAGAUAACAAGGAGAUG	21	Medtr1g099640.1	| metal ion-binding protein, putative | HC | chr1:45010113-45008712 | 20130731	2	-1	1	21	627	647	AAGGAAGAUAACAAGGAGAUG	: :::.: :::::::::.:::	CUUCUUCAUGUUAUCUUUCUU	Cleavage	1
Cluster_1058	AAGGAAGAUAACAAGGAGAUG	21	Medtr1g105840.1	| cysteine-rich receptor-kinase-like protein | HC | chr1:47772789-47775964 | 20130731	2	-1	1	21	14	34	AAGGAAGAUAACAAGGAGAUG	: :.::.::::::::::..::	CCUUUCUUUGUUAUCUUUUUU	Cleavage	1
Cluster_1058	AAGGAAGAUAACAAGGAGAUG	21	Medtr3g106100.1	| nucleic acid-binding protein, putative | HC | chr3:48971316-48964581 | 20130731	2	-1	1	21	118	138	AAGGAAGAUAACAAGGAGAUG	:.::: ::::::.::::::	GUUUUCCCUGUUAUUUUCCUU	Cleavage	1
Cluster_1058	AAGGAAGAUAACAAGGAGAUG	21	Medtr4g083620.1	| E3 ubiquitin-protein ligase LIN-like protein, putative | HC | chr4:32538813-32540283 | 20130731	2	-1	1	21	29	49	AAGGAAGAUAACAAGGAGAUG	: ::::.::::::::::: ::	CUUCUCUUUGUUAUCUUCAUU	Cleavage	1
Cluster_1058	AAGGAAGAUAACAAGGAGAUG	21	Medtr1g099640.2	| metal ion-binding protein, putative | HC | chr1:45009837-45008712 | 20130731	2	-1	1	21	680	700	AAGGAAGAUAACAAGGAGAUG	: :::.: :::::::::.:::	CUUCUUCAUGUUAUCUUUCUU	Cleavage	1
Cluster_1058	AAGGAAGAUAACAAGGAGAUG	21	Medtr6g478190.1	| hsp20/alpha crystallin family protein | HC | chr6:29070474-29068817 | 20130731	2	-1	1	21	730	750	AAGGAAGAUAACAAGGAGAUG	::.: ::::::::::::.::	AAUUUGCUUGUUAUCUUCUUU	Cleavage	1
Cluster_106	ACGUCCAUAUCAAAAGGUUGAU	22	Medtr1g046010.1	| hypothetical protein | HC | chr1:17326085-17325215 | 20130731	2	-1	1	22	161	182	ACGUCCAUAUCAAAAGGUUGAU	::.::::::::::::.::	GAGUACUUUUUGAUAUGGAUGU	Cleavage	1
Cluster_1065	UCAGAUAAUCCGGAUAGAAACCG	23	Medtr4g127380.1	| poly(rC)-binding-like protein | HC | chr4:52864244-52858917 | 20130731	2	-1	1	23	467	489	UCAGAUAAUCCGGAUAGAAACCG	: ::::::::::::::::	AAACGUGUAUCCGGAUUAUCUGA	Cleavage	1
Cluster_1065	UCAGAUAAUCCGGAUAGAAACCG	23	Medtr2g080280.1	| hypothetical protein | LC | chr2:33887397-33892802 | 20130731	2	-1	1	23	460	482	UCAGAUAAUCCGGAUAGAAACCG	::: ::.::::::::::.:::	AAGUUGCUGUCCGGAUUAUUUGA	Cleavage	1
Cluster_1066	AUAUGGUAAGAAGGAUCUUGGUG	23	Medtr1g107455.1	| UDP-D-apiose/UDP-D-xylose synthase | HC | chr1:48752813-48754015 | 20130731	2	-1	1	23	544	566	AUAUGGUAAGAAGGAUCUUGGUG	:..::::::::: :::::.::::	CGUCAAGAUCCUGCUUACUAUAU	Translation	1
Cluster_1109	UAACAAUAUGUAGUAACUGUGACC	24	Medtr2g007840.2	| COP9 signalosome complex subunit 8 | HC | chr2:1159794-1164110 | 20130731	2	-1	1	24	1082	1105	UAACAAUAUGUAGUAACUGUGACC	: :::::::::.::::: :::	AAACCCAGUUACUAUAUAUUCUUA	Cleavage	1
Cluster_1109	UAACAAUAUGUAGUAACUGUGACC	24	Medtr3g115100.7	| UDP-N-acetylglucosamine transferase subunit alg13 | HC | chr3:53788128-53793874 | 20130731	2	-1	1	24	189	212	UAACAAUAUGUAGUAACUGUGACC	..: :::.::.::::::::::	GACUGCUGUUGCUGCAUAUUGUUA	Cleavage	1
Cluster_1109	UAACAAUAUGUAGUAACUGUGACC	24	Medtr3g115100.4	| UDP-N-acetylglucosamine transferase subunit alg13 | HC | chr3:53788201-53793874 | 20130731	2	-1	1	24	116	139	UAACAAUAUGUAGUAACUGUGACC	..: :::.::.::::::::::	GACUGCUGUUGCUGCAUAUUGUUA	Cleavage	1
Cluster_1109	UAACAAUAUGUAGUAACUGUGACC	24	Medtr2g007840.1	| COP9 signalosome complex subunit 8 | HC | chr2:1159794-1164110 | 20130731	2	-1	1	24	1063	1086	UAACAAUAUGUAGUAACUGUGACC	: :::::::::.::::: :::	AAACCCAGUUACUAUAUAUUCUUA	Cleavage	1
Cluster_1117	UUUCGACUUUGGGAAGCUUCAAGU	24	Medtr4g124800.1	| flavin containing monooxygenase family protein | HC | chr4:51731630-51728451 | 20130731	2	-1	1	24	1355	1378	UUUCGACUUUGGGAAGCUUCAAGU	: :: :::::::: :::::.::::	AGUUCAAGCUUCCAAAAGUUGAAA	Translation	1
Cluster_1117	UUUCGACUUUGGGAAGCUUCAAGU	24	Medtr3g452530.1	| hypothetical protein | LC | chr3:19216506-19211445 | 20130731	2	-1	1	24	1826	1849	UUUCGACUUUGGGAAGCUUCAAGU	:::.::::..::::.::::	CUAACAAGUUUCCUGAAGUUGAAA	Cleavage	1
Cluster_1129	UACCGGAACCAAUUUCUUGAACGU	24	Medtr6g004240.1	| lisH domain and HEAT repeat KIAA1468-like protein | HC | chr6:200836-208064 | 20130731	2	-1	1	24	1936	1959	UACCGGAACCAAUUUCUUGAACGU	:: :::::.:::::::::::: :	ACUCUCAAGGAAUUGGUUCCGGCA	Cleavage	1
Cluster_1131	UAAAUUCAGGAUGAUGAGAUAACC	24	Medtr7g006570.2	| FKBP-type peptidyl-prolyl cis-trans isomerase | HC | chr7:752211-756734 | 20130731	2	-1	1	24	867	890	UAAAUUCAGGAUGAUGAGAUAACC	::::: ::::::::::::	AUUCUUCUCAACAUCCUGAAUUUC	Cleavage	1
Cluster_1142	AAAGGAUUGAACUGGUCAA	19	Medtr5g068580.3	| vacuolar iron transporter-like protein | HC | chr5:29042005-29036788 | 20130731	2	-1	1	19	1551	1569	AAAGGAUUGAACUGGUCAA	: ::::::::::::::::	AUCACCAGUUCAAUCCUUU	Cleavage	1
Cluster_1142	AAAGGAUUGAACUGGUCAA	19	Medtr5g068580.2	| vacuolar iron transporter-like protein | HC | chr5:29042005-29036870 | 20130731	2	-1	1	19	1551	1569	AAAGGAUUGAACUGGUCAA	: ::::::::::::::::	AUCACCAGUUCAAUCCUUU	Cleavage	1
Cluster_1142	AAAGGAUUGAACUGGUCAA	19	Medtr5g068580.1	| vacuolar iron transporter-like protein | HC | chr5:29043281-29036788 | 20130731	2	-1	1	19	2117	2135	AAAGGAUUGAACUGGUCAA	: ::::::::::::::::	AUCACCAGUUCAAUCCUUU	Cleavage	1
Cluster_1142	AAAGGAUUGAACUGGUCAA	19	Medtr7g096150.1	| photosystem II reaction center W | HC | chr7:38559132-38558008 | 20130731	2	-1	1	19	871	889	AAAGGAUUGAACUGGUCAA	:::. :::::::.::::::	UUGGACAGUUCAGUCCUUU	Cleavage	1
Cluster_1183	UUGAUGUAAAACUUUAACUUGGCC	24	Medtr1g014340.2	| PPR containing plant-like protein | HC | chr1:3000992-3003085 | 20130731	2	-1	1	24	58	81	UUGAUGUAAAACUUUAACUUGGCC	:::: :::::::::::::::	AAGCAAGGGAAAGUUUUACAUCAA	Cleavage	1
Cluster_1183	UUGAUGUAAAACUUUAACUUGGCC	24	Medtr4g093870.1	| 5-oxoprolinase | HC | chr4:37198426-37202960 | 20130731	2	-1	1	24	229	252	UUGAUGUAAAACUUUAACUUGGCC	:::::::.:::::..:::.:	AGGGAAGUUAAGGUUUUGUAUCGA	Cleavage	1
Cluster_1183	UUGAUGUAAAACUUUAACUUGGCC	24	Medtr1g070080.1	| 2OG-Fe(II) oxygenase family oxidoreductase | LC | chr1:30742311-30737607 | 20130731	2	-1	1	24	2139	2162	UUGAUGUAAAACUUUAACUUGGCC	.:: ::::::::::::::::	AAAUAAAAUAAAGUUUUACAUCAA	Cleavage	1
Cluster_1183	UUGAUGUAAAACUUUAACUUGGCC	24	Medtr3g111730.1	| DUF4091 domain protein | HC | chr3:52268088-52257086 | 20130731	2	-1	1	24	2908	2931	UUGAUGUAAAACUUUAACUUGGCC	: ::::.:::::.::::::	AUUAUAUUUAAGGUUUUGCAUCAA	Cleavage	1
Cluster_1183	UUGAUGUAAAACUUUAACUUGGCC	24	Medtr3g111730.2	| DUF4091 domain protein | HC | chr3:52268088-52257086 | 20130731	2	-1	1	24	2897	2920	UUGAUGUAAAACUUUAACUUGGCC	: ::::.:::::.::::::	AUUAUAUUUAAGGUUUUGCAUCAA	Cleavage	1
Cluster_1183	UUGAUGUAAAACUUUAACUUGGCC	24	Medtr4g078600.1	| O-acyltransferase WSD1-like protein | HC | chr4:30229415-30225178 | 20130731	2	-1	1	24	8	31	UUGAUGUAAAACUUUAACUUGGCC	:.: ::::.:::: :::::::::	UGUCUAGUUGAAGUGUUACAUCAA	Translation	1
Cluster_1183	UUGAUGUAAAACUUUAACUUGGCC	24	Medtr1g014340.1	| PPR containing plant-like protein | HC | chr1:3000992-3003085 | 20130731	2	-1	1	24	58	81	UUGAUGUAAAACUUUAACUUGGCC	:::: :::::::::::::::	AAGCAAGGGAAAGUUUUACAUCAA	Cleavage	1
Cluster_1184	UAAUCAUUUCAAGGCACUG	19	Medtr8g077600.1	| AP-1 complex subunit sigma-like protein | HC | chr8:33011642-33006705 | 20130731	2	-1	1	19	983	1001	UAAUCAUUUCAAGGCACUG	:: ::::::::::::.::.	CAUUGCCUUGAAAUGGUUG	Cleavage	1
Cluster_1185	AGGAUUAAAGUUAAGUAGGUUUGCU	25	Medtr8g061280.1	| 26S proteasome non-ATPase regulatory subunit 5 | HC | chr8:21093447-21073906 | 20130731	2	-1	1	25	1922	1946	AGGAUUAAAGUUAAGUAGGUUUGCU	:: ::::.::::.::::::..:	UUAAACCCUAUUUAAUUUUAAUUUU	Cleavage	1
Cluster_1187	UAAGAUUUGUAGGCGCGUUCCGC	23	Medtr5g005840.1	| chromatin remodeling factor, putative | HC | chr5:644652-653059 | 20130731	2	-1	1	23	102	124	UAAGAUUUGUAGGCGCGUUCCGC	:::::::.:::::: ::::	CUCAAACGCGCUUACAAAGCUUA	Cleavage	1
Cluster_1193	UGAGGUUGAACUUGAGGCAUGG	22	Medtr2g104400.1	| transcription cofactor, putative | HC | chr2:44970630-44960684 | 20130731	2	-1	1	22	1571	1592	UGAGGUUGAACUUGAGGCAUGG	::::: ::.::::::.::::	UGAUGCCACAGGUUCAAUCUCA	Cleavage	1
Cluster_1193	UGAGGUUGAACUUGAGGCAUGG	22	Medtr7g020800.2	| integral membrane HRF1 family protein | HC | chr7:6477697-6482396 | 20130731	2	-1	1	22	418	439	UGAGGUUGAACUUGAGGCAUGG	.:::::::: ::::.:::::	GGGUGCCUCAAUUUCAGCCUCA	Translation	1
Cluster_1193	UGAGGUUGAACUUGAGGCAUGG	22	Medtr5g008280.1	| zinc finger-like protein | LC | chr5:1724313-1725476 | 20130731	2	-1	1	22	747	768	UGAGGUUGAACUUGAGGCAUGG	:::.:::::::::: ::::	UGUUGCUUCAAGUUCAAACUCA	Cleavage	1
Cluster_1193	UGAGGUUGAACUUGAGGCAUGG	22	Medtr2g104400.2	| transcription cofactor, putative | HC | chr2:44969382-44960684 | 20130731	2	-1	1	22	1834	1855	UGAGGUUGAACUUGAGGCAUGG	::::: ::.::::::.::::	UGAUGCCACAGGUUCAAUCUCA	Cleavage	1
Cluster_1193	UGAGGUUGAACUUGAGGCAUGG	22	Medtr7g020800.1	| integral membrane HRF1 family protein | HC | chr7:6477697-6482396 | 20130731	2	-1	1	22	176	197	UGAGGUUGAACUUGAGGCAUGG	.:::::::: ::::.:::::	GGGUGCCUCAAUUUCAGCCUCA	Translation	1
Cluster_1194	AGAGGACUCAUGAAUCAAUUCG	22	Medtr7g094300.1	| transmembrane protein, putative | LC | chr7:37533000-37533575 | 20130731	2	-1	1	22	439	460	AGAGGACUCAUGAAUCAAUUCG	::: ::::.:::.:::::::	GCAAUGGAUUUAUGGGUCCUCU	Cleavage	1
Cluster_1196	UCGGAUGUUGUAUUGGAAAUGUC	23	Medtr2g080220.1	| malectin/receptor-like kinase family protein | HC | chr2:33870337-33873745 | 20130731	2	-1	1	23	1422	1444	UCGGAUGUUGUAUUGGAAAUGUC	..::::::::.::::::: ::	UUUGUUUCCAAUGCAACAUCGGA	Cleavage	1
Cluster_1197	UCCAAGGAUUUAUAGAACACCU	22	Medtr5g085880.1	| FAM91A1-like protein | HC | chr5:37121984-37115509 | 20130731	2	-1	1	22	1891	1912	UCCAAGGAUUUAUAGAACACCU	: ::::::.:.::::::::	UAUUCUUCUAUGAGUCCUUGGA	Cleavage	1
Cluster_1199	UAGUGAAUGAUCUUGGACU	19	Medtr2g050100.1	| hypothetical protein | HC | chr2:23007611-23008557 | 20130731	2	-1	1	19	464	482	UAGUGAAUGAUCUUGGACU	: ::.:.::::::::::::	AAUCUAGGAUCAUUCACUA	Cleavage	1
Cluster_1200	UGAGGUACGAACUUUUAACAUGUU	24	Medtr4g129860.1	| metal-dependent phosphohydrolase | HC | chr4:54136556-54144304 | 20130731	2	-1	1	24	1016	1039	UGAGGUACGAACUUUUAACAUGUU	:::::::::.:::.::::	AUUCCCUUAAAAGUUUGUAUCUCA	Cleavage	1
Cluster_1211	CAAAAGAGAAUCAGACAUGAAC	22	Medtr7g117565.3	| exportin-T-like protein | HC | chr7:48740783-48719666 | 20130731	2	-1	1	22	2250	2271	CAAAAGAGAAUCAGACAUGAAC	:::::::.::.:::::::	GCAAAUGUCUGGUUUUCUUUUG	Cleavage	1
Cluster_1211	CAAAAGAGAAUCAGACAUGAAC	22	Medtr7g117565.2	| exportin-T-like protein | HC | chr7:48740783-48719666 | 20130731	2	-1	1	22	2250	2271	CAAAAGAGAAUCAGACAUGAAC	:::::::.::.:::::::	GCAAAUGUCUGGUUUUCUUUUG	Cleavage	1
Cluster_1211	CAAAAGAGAAUCAGACAUGAAC	22	Medtr7g117565.1	| exportin-T-like protein | HC | chr7:48740783-48719666 | 20130731	2	-1	1	22	2250	2271	CAAAAGAGAAUCAGACAUGAAC	:::::::.::.:::::::	GCAAAUGUCUGGUUUUCUUUUG	Cleavage	1
Cluster_1212	UAAAUGAUCAGCGAGGAUUUGC	22	Medtr4g130490.4	| DUF566 family protein | HC | chr4:54367429-54372849 | 20130731	2	-1	1	22	190	211	UAAAUGAUCAGCGAGGAUUUGC	::::.:::::: :::::::	GAUAAUCUUCGCUGUUCAUUUA	Cleavage	1
Cluster_1212	UAAAUGAUCAGCGAGGAUUUGC	22	Medtr4g130490.2	| DUF566 family protein | HC | chr4:54367429-54375521 | 20130731	2	-1	1	22	190	211	UAAAUGAUCAGCGAGGAUUUGC	::::.:::::: :::::::	GAUAAUCUUCGCUGUUCAUUUA	Cleavage	1
Cluster_1212	UAAAUGAUCAGCGAGGAUUUGC	22	Medtr4g130490.3	| DUF566 family protein | HC | chr4:54368906-54375521 | 20130731	2	-1	1	22	309	330	UAAAUGAUCAGCGAGGAUUUGC	::::.:::::: :::::::	GAUAAUCUUCGCUGUUCAUUUA	Cleavage	1
Cluster_1212	UAAAUGAUCAGCGAGGAUUUGC	22	Medtr4g130490.1	| DUF566 family protein | HC | chr4:54367443-54375516 | 20130731	2	-1	1	22	176	197	UAAAUGAUCAGCGAGGAUUUGC	::::.:::::: :::::::	GAUAAUCUUCGCUGUUCAUUUA	Cleavage	1
Cluster_1213	GAGGACAUAUGAAAAGUUAAUC	22	Medtr1g023770.1	| rhicadhesin receptor | HC | chr1:7663069-7661893 | 20130731	2	-1	1	22	170	191	GAGGACAUAUGAAAAGUUAAUC	: :::::::::::::: :.:::	GUUUAACUUUUCAUAUUUUCUC	Cleavage	1
Cluster_123	UAGUGAACUUUUGAAACUUGGCUC	24	Medtr2g028360.1	| elongation factor Tu GTP-binding domain protein | LC | chr2:10494432-10482310 | 20130731	2	-1	1	24	1818	1842	UAGUGAACUUUUGAAACUUG-GCUC	:::. :::::::::::::::.: ::	GAGUGCAAGUUUCAAAAGUUUAGUA	Cleavage	1
Cluster_1275	UCCACAAUCAUCCUGGACG	19	Medtr2g064740.1	| U5 small nuclear ribonucleoprotein 200 kDa helicase | HC | chr2:29260637-29270804 | 20130731	2	-1	1	19	4078	4096	UCCACAAUCAUCCUGGACG	:::.: ::.::::::::::	CGUUCUGGGUGAUUGUGGA	Cleavage	1
Cluster_1277	UCUUAGGAUCAUGAAAUUUUUCA	23	Medtr3g110058.1	| structural maintenance of chromosomes protein | HC | chr3:50931665-50924711 | 20130731	2	-1	1	23	261	283	UCUUAGGAUCAUGAAAUUUUUCA	::.::::: ::::::::.:.:::	UGGAAAAUAUCAUGAUCUUGAGA	Cleavage	1
Cluster_1277	UCUUAGGAUCAUGAAAUUUUUCA	23	Medtr4g070430.4	| glucose-1-phosphate adenylyltransferase family protein | HC | chr4:26545390-26540609 | 20130731	2	-1	1	23	1561	1583	UCUUAGGAUCAUGAAAUUUUUCA	::::::.::::::: ::::	GUUCAAAUUUUAUGAUCCCAAGA	Cleavage	1
Cluster_1277	UCUUAGGAUCAUGAAAUUUUUCA	23	Medtr4g070430.1	| glucose-1-phosphate adenylyltransferase family protein | HC | chr4:26545426-26540606 | 20130731	2	-1	1	23	1597	1619	UCUUAGGAUCAUGAAAUUUUUCA	::::::.::::::: ::::	GUUCAAAUUUUAUGAUCCCAAGA	Cleavage	1
Cluster_1277	UCUUAGGAUCAUGAAAUUUUUCA	23	Medtr4g070430.5	| glucose-1-phosphate adenylyltransferase family protein | HC | chr4:26545419-26540606 | 20130731	2	-1	1	23	1696	1718	UCUUAGGAUCAUGAAAUUUUUCA	::::::.::::::: ::::	GUUCAAAUUUUAUGAUCCCAAGA	Cleavage	1
Cluster_1277	UCUUAGGAUCAUGAAAUUUUUCA	23	Medtr4g070430.3	| glucose-1-phosphate adenylyltransferase family protein | HC | chr4:26545305-26540639 | 20130731	2	-1	1	23	1434	1456	UCUUAGGAUCAUGAAAUUUUUCA	::::::.::::::: ::::	GUUCAAAUUUUAUGAUCCCAAGA	Cleavage	1
Cluster_1277	UCUUAGGAUCAUGAAAUUUUUCA	23	Medtr4g070430.2	| glucose-1-phosphate adenylyltransferase family protein | HC | chr4:26545390-26540609 | 20130731	2	-1	1	23	1667	1689	UCUUAGGAUCAUGAAAUUUUUCA	::::::.::::::: ::::	GUUCAAAUUUUAUGAUCCCAAGA	Cleavage	1
Cluster_1277	UCUUAGGAUCAUGAAAUUUUUCA	23	Medtr7g491190.1	| NBS-LRR disease resistance protein | LC | chr7:35982904-35978998 | 20130731	2	-1	1	23	2271	2293	UCUUAGGAUCAUGAAAUUUUUCA	::::::::::: :::::.:::::	UGAAAAAUUUCUUGAUCUUAAGA	Cleavage	1
Cluster_1277	UCUUAGGAUCAUGAAAUUUUUCA	23	Medtr7g091200.1	| NBS-LRR disease resistance protein | LC | chr7:36004253-36000732 | 20130731	2	-1	1	23	2265	2287	UCUUAGGAUCAUGAAAUUUUUCA	::::::::::: :::::.:::::	UGAAAAAUUUCUUGAUCUUAAGA	Cleavage	1
Cluster_1278	UCACGGAGAGAACUUUGUGGCCU	23	Medtr3g082870.1	| ankyrin repeat and BTB/POZ domain protein | HC | chr3:37401116-37406578 | 20130731	2	-1	1	23	429	451	UCACGGAGAGAACUUUGUGGCCU	:...::.::::::::.:::::	CCGUUGCAGAGUUCUCUUCGUGA	Cleavage	1
Cluster_1278	UCACGGAGAGAACUUUGUGGCCU	23	Medtr3g082870.2	| ankyrin repeat and BTB/POZ domain protein | HC | chr3:37401116-37406478 | 20130731	2	-1	1	23	429	451	UCACGGAGAGAACUUUGUGGCCU	:...::.::::::::.:::::	CCGUUGCAGAGUUCUCUUCGUGA	Cleavage	1
Cluster_128	UUGUAUGGAUCAUCAUUUAGUUGA	24	Medtr4g036530.1	| Nodule Cysteine-Rich (NCR) secreted peptide related | HC | chr4:13162512-13162160 | 20130731	2	-1	1	24	93	116	UUGUAUGGAUCAUCAUUUAGUUGA	.: :..:: :::::::::::::	GAGAGUGGAUCAUGAUCCAUACAA	Cleavage	1
Cluster_1286	UUGAUGUCAAAUGAUGAUG	19	Medtr4g026030.1	| cytochrome P450 family 71 protein | HC | chr4:8952646-8955502 | 20130731	2	-1	1	19	383	401	UUGAUGUCAAAUGAUGAUG	:::. ::::::::.:::::	CAUUUUCAUUUGAUAUCAA	Cleavage	1
Cluster_129	UUUUUUGGCACGUUGGAAGAACC	23	Medtr8g075810.2	| apurinic/apyrimidinic endonuclease | HC | chr8:32057216-32050015 | 20130731	2	-1	1	23	84	106	UUUUUUGGCACGUUGGAAGAACC	.::::::.::::::::::	UACAUUUCCAAUGUGCCAAAAAU	Cleavage	1
Cluster_129	UUUUUUGGCACGUUGGAAGAACC	23	Medtr3g064280.1	| zinc finger CCCH domain protein | LC | chr3:28928317-28921679 | 20130731	2	-1	1	23	1294	1316	UUUUUUGGCACGUUGGAAGAACC	.:::.::.:::::::::.:	CGGCUUUCUAAUGUGCCAAAAGA	Cleavage	1
Cluster_1297	UGUUCAUCAGAUUGGUCUUCUGG	23	Medtr2g045000.1	| hypothetical protein | LC | chr2:19581561-19580373 | 20130731	2	-1	1	23	30	52	UGUUCAUCAGAUUGGUCUUCUGG	:::::..::.:::::.:::	CGGAAAGACUGAUUUGAUGGACA	Cleavage	1
Cluster_1297	UGUUCAUCAGAUUGGUCUUCUGG	23	Medtr1g111310.1	| BZIP family transcription factor | LC | chr1:50281639-50275098 | 20130731	2	-1	1	23	136	158	UGUUCAUCAGAUUGGUCUUCUGG	:.:..:::::::::::.::	ACUAAGGGUCAAUCUGAUGAGCA	Cleavage	2
Cluster_1297	UGUUCAUCAGAUUGGUCUUCUGG	23	Medtr1g111310.1	| BZIP family transcription factor | LC | chr1:50281639-50275098 | 20130731	2	-1	1	23	1237	1259	UGUUCAUCAGAUUGGUCUUCUGG	:.:..:::::::::::.::	ACUAAGGGUCAAUCUGAUGAGCA	Cleavage	2
Cluster_1297	UGUUCAUCAGAUUGGUCUUCUGG	23	Medtr1g111320.1	| basic leucine zipper transcription factor | LC | chr1:50290748-50288009 | 20130731	2	-1	1	23	412	434	UGUUCAUCAGAUUGGUCUUCUGG	:.:..:::::::::::.::	ACUAAGGGUCAAUCUGAUGAGCA	Cleavage	1
Cluster_1297	UGUUCAUCAGAUUGGUCUUCUGG	23	Medtr3g044820.1	| transcription factor HBP-1b(c1) protein, putative | HC | chr3:14461348-14462680 | 20130731	2	-1	1	23	109	131	UGUUCAUCAGAUUGGUCUUCUGG	:.:..:::::::::::.::	ACUAAGGGUCAAUCUGAUGAGCA	Cleavage	1
Cluster_1299	UUCGGAUGCCUUUAUUCAUGAGG	23	Medtr7g060260.1	| DUF247 domain protein | LC | chr7:21771850-21773781 | 20130731	2	-1	1	23	27	49	UUCGGAUGCCUUUAUUCAUGAGG	::::::.: ::::::::::	UUGAAUGAAUGAUGGCAUCCGAA	Translation	1
Cluster_1315	UUGGAGAAUGAGGUUCUGCCU	21	Medtr4g087925.1	| glutamate receptor 3.4 | HC | chr4:34604354-34607909 | 20130731	2	-1	1	21	1418	1438	UUGGAGAAUGAGGUUCUGCCU	:: :::::.:::::.:::::	UGGAAGAACUUCAUUUUCCAA	Cleavage	1
Cluster_1315	UUGGAGAAUGAGGUUCUGCCU	21	Medtr4g080100.1	| phospholipase A1 | HC | chr4:31047715-31045592 | 20130731	2	-1	1	21	541	561	UUGGAGAAUGAGGUUCUGCCU	:::: :::::::::::..::	UGGCAAAACCUCAUUCUUUAA	Cleavage	1
Cluster_1315	UUGGAGAAUGAGGUUCUGCCU	21	Medtr4g113990.1	| nudix family hydrolase | HC | chr4:46905004-46908463 | 20130731	2	-1	1	21	1312	1332	UUGGAGAAUGAGGUUCUGCCU	::: ::::.:::::.:::::	UGGCUGAACUUCAUUUUCCAA	Cleavage	1
Cluster_1319	UUACCUUUUCUUCUAGUUGAU	21	Medtr0259s0030.1	| hypothetical protein | LC | scaffold0259:11612-11974 | 20130731	2	-1	1	21	281	301	UUACCUUUUCUUCUAGUUGAU	: ::: ::::::::.:::::.	AACAAGUAGAAGAAGAGGUAG	Cleavage	1
Cluster_1319	UUACCUUUUCUUCUAGUUGAU	21	Medtr7g083520.1	| hypothetical protein | LC | chr7:32127281-32128225 | 20130731	2	-1	1	21	648	668	UUACCUUUUCUUCUAGUUGAU	::.::: ::::::::::::	GGCAGCUAAAAGAAAAGGUAA	Cleavage	1
Cluster_1319	UUACCUUUUCUUCUAGUUGAU	21	Medtr3g464850.1	| hypothetical protein | LC | chr3:26157185-26158237 | 20130731	2	-1	1	21	528	548	UUACCUUUUCUUCUAGUUGAU	::.::: ::::::::::::	GGCAGCUAAAAGAAAAGGUAA	Cleavage	1
Cluster_1319	UUACCUUUUCUUCUAGUUGAU	21	Medtr3g019370.1	| U3 small nucleolar IMP4-like ribonucleoprotein | HC | chr3:5435201-5441777 | 20130731	2	-1	1	21	1105	1125	UUACCUUUUCUUCUAGUUGAU	::.:::::::::::: :::	UGCAGCUAGAAGAAAAGCUAA	Cleavage	1
Cluster_1319	UUACCUUUUCUUCUAGUUGAU	21	Medtr7g072210.1	| hypothetical protein | LC | chr7:26815427-26814273 | 20130731	2	-1	1	21	852	872	UUACCUUUUCUUCUAGUUGAU	::.::: ::::::::::::	GGCAGCUAAAAGAAAAGGUAA	Cleavage	1
Cluster_1321	UGGAUUAGAGAAUUUGAAG	19	Medtr0252s0060.1	| PPR containing plant-like protein | LC | scaffold0252:20183-22041 | 20130731	2	-1	1	19	1251	1269	UGGAUUAGAGAAUUUGAAG	:::::::::.:.::::::	CUUCAAAUUUUUUAAUCCU	Cleavage	1
Cluster_1321	UGGAUUAGAGAAUUUGAAG	19	Medtr0014s0250.1	| pentatricopeptide (PPR) repeat protein | LC | scaffold0014:136046-137820 | 20130731	2	-1	1	19	841	859	UGGAUUAGAGAAUUUGAAG	:::. ::::::::::::.:	CUUUCAAUUCUCUAAUCUA	Cleavage	1
Cluster_1321	UGGAUUAGAGAAUUUGAAG	19	Medtr8g024250.1	| late embryogenesis abundant protein | HC | chr8:8894604-8893236 | 20130731	2	-1	1	19	1	19	UGGAUUAGAGAAUUUGAAG	.::::::::::::: ::::	UUUCAAAUUCUCUAUUCCA	Cleavage	1
Cluster_1322	CGGAACCAUAGUAAUUAUAAAUG	23	Medtr2g011660.1	| myb transcription factor | HC | chr2:2892991-2891380 | 20130731	2	-1	1	23	1003	1025	CGGAACCAUAGUAAUUAUAAAUG	: :::::::.::::::::.:	CUAUAAUAAUUAUUAUGGUUCUG	Cleavage	1
Cluster_133	UGUAUGCUUUCAAGUUGAU	19	Medtr3g079805.1	| DUF4283 domain protein | LC | chr3:36032019-36030611 | 20130731	2	-1	1	19	790	808	UGUAUGCUUUCAAGUUGAU	:::::: ::.:::::::::	AUCAACGUGGAAGCAUACA	Cleavage	1
Cluster_133	UGUAUGCUUUCAAGUUGAU	19	Medtr3g091200.1	| RING-H2 finger ATL21B-like protein, putative | HC | chr3:41464332-41460969 | 20130731	2	-1	1	19	98	116	UGUAUGCUUUCAAGUUGAU	:::::.:::::::.::::	AUCAAUUUGAAAGUAUACU	Cleavage	1
Cluster_133	UGUAUGCUUUCAAGUUGAU	19	Medtr2g036740.2	| hypothetical protein | HC | chr2:15907109-15910681 | 20130731	2	-1	1	19	510	528	UGUAUGCUUUCAAGUUGAU	:::::::: ::::::::.:	AUCAACUUUAAAGCAUAUA	Translation	1
Cluster_133	UGUAUGCUUUCAAGUUGAU	19	Medtr3g110385.1	| frigida-LIKE protein | LC | chr3:51573611-51577344 | 20130731	2	-1	1	19	1993	2011	UGUAUGCUUUCAAGUUGAU	::::.::::::::.::::	CUCAAUUUGAAAGCGUACA	Cleavage	1
Cluster_133	UGUAUGCUUUCAAGUUGAU	19	Medtr4g088965.1	| mediator of RNA polymerase II transcription subunit 16 | HC | chr4:35573049-35558652 | 20130731	2	-1	1	19	2266	2284	UGUAUGCUUUCAAGUUGAU	:::::::::..:::.:.::	AUCAACUUGGGAGCGUGCA	Cleavage	1
Cluster_133	UGUAUGCUUUCAAGUUGAU	19	Medtr8g030980.1	| transmembrane protein, putative | LC | chr8:11548727-11548269 | 20130731	2	-1	1	19	148	166	UGUAUGCUUUCAAGUUGAU	: :::.:::::::::::.:	AGCAAUUUGAAAGCAUAUA	Cleavage	1
Cluster_1338	UCUGUUGUAAUGUUUGAACUUGGUC	25	Medtr5g082590.1	| phosphoinositide-specific phospholipase C family protein | HC | chr5:35519464-35523640 | 20130731	2	-1	1	21	1	21	UCUGUUGUAAUGUUUGAACUU	: ::::::::.:: :::::::	AUGUUCAAACGUUUCAACAGA	Cleavage	1
Cluster_1338	UCUGUUGUAAUGUUUGAACUUGGUC	25	Medtr8g040940.1	| hypothetical protein | LC | chr8:15355791-15357184 | 20130731	2	-1	1	25	373	397	UCUGUUGUAAUGUUUGAACUUGGUC	: :..:::::::.:::.:.:.:::	CAACGGGUUCAAAUAUUGCGAUAGA	Cleavage	1
Cluster_1338	UCUGUUGUAAUGUUUGAACUUGGUC	25	Medtr8g040940.2	| hypothetical protein | LC | chr8:15354196-15357869 | 20130731	2	-1	1	25	747	771	UCUGUUGUAAUGUUUGAACUUGGUC	: :..:::::::.:::.:.:.:::	CAACGGGUUCAAAUAUUGCGAUAGA	Cleavage	1
Cluster_1343	UACAAUCAUCGCCAACUUUCUUCC	24	Medtr5g088320.1	| EF hand calcium-binding family protein | HC | chr5:38319949-38316704 | 20130731	2	-1	1	24	305	328	UACAAUCAUCGCCAACUUUCUUCC	.: ::.: ::::::::.:::::	UCGAUAAGGAUGGCGAUGGUUGUA	Cleavage	1
Cluster_1343	UACAAUCAUCGCCAACUUUCUUCC	24	Medtr1g017990.1	| ZCF37, putative | HC | chr1:5145127-5146802 | 20130731	2	-1	1	24	1209	1232	UACAAUCAUCGCCAACUUUCUUCC	:. ::::::::.::: ::::::	CAAGAAAAGUUGGUGAUCAUUGUA	Cleavage	1
Cluster_1343	UACAAUCAUCGCCAACUUUCUUCC	24	Medtr3g435740.1	| NB-ARC domain disease resistance protein, putative | LC | chr3:11782826-11778460 | 20130731	2	-1	1	24	1533	1556	UACAAUCAUCGCCAACUUUCUUCC	:.::.:::::::.:::::::::	UGGAGGAAGUUGGUGAUGAUUGUU	Cleavage	1
Cluster_1344	UUUGAGAUUCGUAGGAUUGUCUA	23	Medtr0041s0030.1	| EIN2-like protein, nramp transporter | HC | scaffold0041:13660-21631 | 20130731	2	-1	1	23	274	296	UUUGAGAUUCGUAGGAUUGUCUA	.:::.:::::.::.:::::	ACCCUAAUUCUACGGAUUUCAAA	Cleavage	1
Cluster_1346	CAAGAAUUAAAGGACGUAAUGUUU	24	Medtr4g088695.1	| VQ motif protein | HC | chr4:35303299-35302060 | 20130731	2	-1	1	24	1127	1150	CAAGAAUUAAAGGACGUAAUGUUU	: :::: ::.:::::::.:::	UUUCUUUACCUCUUUUAAUUUUUG	Cleavage	1
Cluster_1381	UGAACACAAGAAAAUUAGGGAUG	23	Medtr1g008310.1	| PPR containing plant-like protein | HC | chr1:854624-850741 | 20130731	2	-1	1	23	1055	1077	UGAACACAAGAAAAUUAGGGAUG	:::::: ::::::::::.:	UAAGCCUAAUCUUCUUGUGUUUA	Cleavage	1
Cluster_1385	AAGGAUGCAUAAAAUUAGUUG	21	Medtr3g465680.1	| cation/H+ exchanger 3 | LC | chr3:26855069-26858176 | 20130731	2	-1	1	21	1822	1842	AAGGAUGCAUAAAAUUAGUUG	:.: ::.::::::::::.:::	CGAAUAGUUUUAUGCAUUCUU	Cleavage	1
Cluster_1387	UUGUUCUUAUAUUGUUUAGCCU	22	Medtr2g033170.1	| myb transcription factor | HC | chr2:12558787-12561118 | 20130731	2	-1	1	22	1339	1360	UUGUUCUUAUAUUGUUUAGCCU	.:::. :::::::::::::	AAAUUAAGGAAUAUAAGAACAA	Cleavage	1
Cluster_1387	UUGUUCUUAUAUUGUUUAGCCU	22	Medtr4g076640.1	| hypothetical protein | LC | chr4:29313688-29316024 | 20130731	2	-1	1	22	2168	2189	UUGUUCUUAUAUUGUUUAGCCU	::::::.::::::::::.	UUUGUAAACAGUAUAAGAACAG	Cleavage	1
Cluster_1391	UCUGAAAUCAAAGAAUGUGUUCUU	24	Medtr4g132420.2	| fungal proteinase A, aspartic proteinase superfamily protein | HC | chr4:55357465-55349221 | 20130731	2	-1	1	24	1606	1629	UCUGAAAUCAAAGAAUGUGUUCUU	::::: ::::::::::..::	UACCACACAGUCUUUGAUUUUGGA	Cleavage	1
Cluster_1391	UCUGAAAUCAAAGAAUGUGUUCUU	24	Medtr4g132420.1	| fungal proteinase A, aspartic proteinase superfamily protein | HC | chr4:55357714-55349221 | 20130731	2	-1	1	24	1769	1792	UCUGAAAUCAAAGAAUGUGUUCUU	::::: ::::::::::..::	UACCACACAGUCUUUGAUUUUGGA	Cleavage	1
Cluster_1391	UCUGAAAUCAAAGAAUGUGUUCUU	24	Medtr4g132420.3	| fungal proteinase A, aspartic proteinase superfamily protein | HC | chr4:55357448-55349221 | 20130731	2	-1	1	24	1698	1721	UCUGAAAUCAAAGAAUGUGUUCUU	::::: ::::::::::..::	UACCACACAGUCUUUGAUUUUGGA	Cleavage	1
Cluster_1400	UCGGAGGAUUGCCGAUGUUGAUCGU	25	Medtr4g023630.1	| eukaryotic aspartyl protease family protein | HC | chr4:8020963-8023463 | 20130731	2	-1	1	25	193	217	UCGGAGGAUUGCCGAUGUUGAUCGU	: ::::::::.::::::::::: :	UCCAUCAACAUUGGCAAUCCUCCCA	Cleavage	1
Cluster_1400	UCGGAGGAUUGCCGAUGUUGAUCGU	25	Medtr4g023650.1	| eukaryotic aspartyl protease family protein | LC | chr4:8031021-8033469 | 20130731	2	-1	1	25	193	217	UCGGAGGAUUGCCGAUGUUGAUCGU	: ::::::::.::::::::::: :	UCCAUCAACAUUGGCAAUCCUCCCA	Cleavage	1
Cluster_1401	UCUUUUGAUUCAUGUAGGCUGGCCU	25	Medtr3g102800.1	| arginine N-methyltransferase-like protein | HC | chr3:47362171-47364595 | 20130731	2	-1	1	25	1235	1259	UCUUUUGAUUCAUGUAGGCUGGCCU	:::.:::::::..::::.:::	CUUACAGUCUACAUGGGUCAAGAGA	Cleavage	1
Cluster_1402	CAACGGAUAUAGAUUCAAAAAUC	23	Medtr3g099880.1	| localization and RNA pol II promoter Fmp27 domain protein | HC | chr3:45820368-45850165 | 20130731	2	-1	1	23	564	586	CAACGGAUAUAGAUUCAAAAAUC	: ::::::::.::::.::::	UGCUGUUGAAUCUGUAUCUGUUG	Cleavage	1
Cluster_1405	AAAACUGAUCACCAAGAUCUGCACC	25	Medtr1g081180.1	| trihelix transcription factor | HC | chr1:36129455-36127007 | 20130731	2	-1	1	25	1917	1941	AAAACUGAUCACCAAGAUCUGCACC	: ..:::.::: :::::::::::	UCUUUGGAUUUUGAUGAUCAGUUUU	Cleavage	1
Cluster_1407	UCUACUUUCAUGGAGGACU	19	Medtr4g121140.1	| carboxy-terminal domain phosphatase-like protein | HC | chr4:50177925-50171180 | 20130731	2	-1	1	19	367	385	UCUACUUUCAUGGAGGACU	:::: :::.::::.:::::	AGUCAUCCGUGAAGGUAGA	Cleavage	1
Cluster_1407	UCUACUUUCAUGGAGGACU	19	Medtr4g121140.2	| carboxy-terminal domain phosphatase-like protein | HC | chr4:50177908-50171229 | 20130731	2	-1	1	19	341	359	UCUACUUUCAUGGAGGACU	:::: :::.::::.:::::	AGUCAUCCGUGAAGGUAGA	Cleavage	1
Cluster_1426	UCAAAUUUUGAACAUCAGGCACCU	24	Medtr7g028448.1	| MADS-box transcription factor family protein | LC | chr7:9668610-9668101 | 20130731	2	-1	1	24	341	364	UCAAAUUUUGAACAUCAGGCACCU	: ::::::::::::::::	AACUAGCCGAUGUUCAAAAUUUGA	Cleavage	1
Cluster_1426	UCAAAUUUUGAACAUCAGGCACCU	24	Medtr4g036915.1	| MADS-box transcription factor family protein | LC | chr4:13539634-13539125 | 20130731	2	-1	1	24	341	364	UCAAAUUUUGAACAUCAGGCACCU	: ::::::::::::::::	AACUAGCCGAUGUUCAAAAUUUGA	Cleavage	1
Cluster_1426	UCAAAUUUUGAACAUCAGGCACCU	24	Medtr5g094860.1	| tubulin folding cofactor A | HC | chr5:41473628-41476208 | 20130731	2	-1	1	24	521	544	UCAAAUUUUGAACAUCAGGCACCU	: :.:::: ::::::::::::	UUCUCCUUGAUCUUCAAAAUUUGA	Cleavage	1
Cluster_1426	UCAAAUUUUGAACAUCAGGCACCU	24	Medtr5g094290.1	| tubulin folding cofactor A | HC | chr5:41197987-41186098 | 20130731	2	-1	1	24	872	895	UCAAAUUUUGAACAUCAGGCACCU	: :.:::: ::::::::::::	UUCUCCUUGAUCUUCAAAAUUUGA	Cleavage	1
Cluster_1426	UCAAAUUUUGAACAUCAGGCACCU	24	Medtr1g054975.1	| PIF1-like helicase | LC | chr1:24161913-24161104 | 20130731	2	-1	1	24	215	238	UCAAAUUUUGAACAUCAGGCACCU	:::::::::::::::::	CAAAUGAUGAUGUUCAAAAUUUGA	Cleavage	1
Cluster_143	UCGCGUCAAUUUGGAAAUG	19	Medtr3g022230.3	| NB-ARC domain disease resistance protein, putative | LC | chr3:6519072-6523865 | 20130731	2	-1	1	19	2297	2315	UCGCGUCAAUUUGGAAAUG	::::::::::::.::.::	GAUUUCCAAAUUGGCGUGA	Cleavage	1
Cluster_143	UCGCGUCAAUUUGGAAAUG	19	Medtr3g022230.1	| NB-ARC domain disease resistance protein, putative | LC | chr3:6519072-6523865 | 20130731	2	-1	1	19	2297	2315	UCGCGUCAAUUUGGAAAUG	::::::::::::.::.::	GAUUUCCAAAUUGGCGUGA	Cleavage	1
Cluster_143	UCGCGUCAAUUUGGAAAUG	19	Medtr3g022230.4	| NB-ARC domain disease resistance protein, putative | LC | chr3:6519072-6523865 | 20130731	2	-1	1	19	2297	2315	UCGCGUCAAUUUGGAAAUG	::::::::::::.::.::	GAUUUCCAAAUUGGCGUGA	Cleavage	1
Cluster_143	UCGCGUCAAUUUGGAAAUG	19	Medtr3g022230.5	| NB-ARC domain disease resistance protein, putative | LC | chr3:6519072-6523865 | 20130731	2	-1	1	19	2297	2315	UCGCGUCAAUUUGGAAAUG	::::::::::::.::.::	GAUUUCCAAAUUGGCGUGA	Cleavage	1
Cluster_143	UCGCGUCAAUUUGGAAAUG	19	Medtr3g022230.2	| NB-ARC domain disease resistance protein, putative | LC | chr3:6519072-6523865 | 20130731	2	-1	1	19	2297	2315	UCGCGUCAAUUUGGAAAUG	::::::::::::.::.::	GAUUUCCAAAUUGGCGUGA	Cleavage	1
Cluster_1431	UAAAAGUUUUUCAACCUUAGGUGCU	25	Medtr3g061370.1	| plant-specific B3-DNA-binding domain protein | HC | chr3:24369308-24370598 | 20130731	2	-1	1	25	184	208	UAAAAGUUUUUCAACCUUAGGUGCU	:.:::::.::::::::::	UUUGAAAAGGGUUGGAAAACUUUUA	Cleavage	1
Cluster_1431	UAAAAGUUUUUCAACCUUAGGUGCU	25	Medtr3g061340.1	| transcriptional factor B3 family protein | LC | chr3:24361666-24362971 | 20130731	2	-1	1	25	193	217	UAAAAGUUUUUCAACCUUAGGUGCU	:.:::::.::::::::::	UUCGAAAAGGGUUGGAAAACUUUUA	Cleavage	1
Cluster_1431	UAAAAGUUUUUCAACCUUAGGUGCU	25	Medtr3g061350.1	| plant-specific B3-DNA-binding domain protein | LC | chr3:24365409-24364010 | 20130731	2	-1	1	25	193	217	UAAAAGUUUUUCAACCUUAGGUGCU	:.:::::.::::::::::	UUUGAAAAGGGUUGGAAAACUUUUA	Cleavage	1
Cluster_1431	UAAAAGUUUUUCAACCUUAGGUGCU	25	Medtr8g066290.1	| F/Y rich carboxy-terminal protein | HC | chr8:27547316-27559629 | 20130731	2	-1	1	25	3352	3376	UAAAAGUUUUUCAACCUUAGGUGCU	:::: :::::::::::::	UGAGGAGAAGGCUGAAAAACUUUUA	Cleavage	1
Cluster_1432	UUUCAAGUUCAGGAUAAGGCUGCU	24	Medtr8g102755.1	| transmembrane protein, putative | HC | chr8:43256848-43258398 | 20130731	2	-1	1	24	988	1011	UUUCAAGUUCAGGAUAAGGCUGCU	:.::.::.::.::::::::	GCUUUCUUUGUCUUGGACUUGAAA	Cleavage	1
Cluster_1432	UUUCAAGUUCAGGAUAAGGCUGCU	24	Medtr7g024540.1	| geranylgeranyltransferase type I beta subunit | HC | chr7:8090726-8084951 | 20130731	2	-1	1	24	1260	1283	UUUCAAGUUCAGGAUAAGGCUGCU	::. :.::.:.:::::::::.::	AGUCACUUUGUUCUGAACUUGGAA	Cleavage	1
Cluster_1432	UUUCAAGUUCAGGAUAAGGCUGCU	24	Medtr3g037390.1	| timing of cab expression 1/PRR response regulator | HC | chr3:13734998-13728441 | 20130731	2	-1	1	24	1620	1643	UUUCAAGUUCAGGAUAAGGCUGCU	: ::.::::::.:::::::	GGGCUCAUUGUCCUGAGCUUGAAA	Cleavage	1
Cluster_1432	UUUCAAGUUCAGGAUAAGGCUGCU	24	Medtr3g037390.2	| timing of cab expression 1/PRR response regulator | HC | chr3:13734998-13728441 | 20130731	2	-1	1	24	1726	1749	UUUCAAGUUCAGGAUAAGGCUGCU	: ::.::::::.:::::::	GGGCUCAUUGUCCUGAGCUUGAAA	Cleavage	1
Cluster_144	UAUAUAUCUGUUACUUCAUAUGCA	24	Medtr4g094238.1	| heavy metal transport/detoxification superfamily protein | HC | chr4:37506891-37505650 | 20130731	2	-1	1	24	650	673	UAUAUAUCUGUUACUUCAUAUGCA	.:.:::.::.:.:::::::::	CUAGUGUGAGGUGAUAGAUAUAUA	Cleavage	1
Cluster_144	UAUAUAUCUGUUACUUCAUAUGCA	24	Medtr7g072860.1	| WNK kinase | HC | chr7:27184110-27187851 | 20130731	2	-1	1	24	618	641	UAUAUAUCUGUUACUUCAUAUGCA	::::: ::..:::::::::	AUACAAUGAACUAGUAGAUAUAUA	Cleavage	1
Cluster_144	UAUAUAUCUGUUACUUCAUAUGCA	24	Medtr7g072640.1	| WNK kinase | HC | chr7:27094193-27090450 | 20130731	2	-1	1	24	618	641	UAUAUAUCUGUUACUUCAUAUGCA	::::: ::..:::::::::	AUACAAUGAACUAGUAGAUAUAUA	Cleavage	1
Cluster_1449	UCACUCCUUGUUGACCUGACUU	22	Medtr4g107650.1	| homeobox leucine zipper family protein | HC | chr4:44594969-44592337 | 20130731	2	-1	1	22	1329	1350	UCACUCCUUGUUGACCUGACUU	:.:: :::.::::::::::	AUAUUAGUUCAGCAAGGAGUGA	Cleavage	1
Cluster_1484	UUAUUAAUGUCCAAAUCUGUUCUU	24	Medtr4g125440.1	| RNI superfamily protein | HC | chr4:52012520-52008004 | 20130731	2	-1	1	24	674	697	UUAUUAAUGUCCAAAUCUGUUCUU	: ..::::::::.::::::.:	AUCACUGGAUUUGGAUAUUAAUGA	Cleavage	1
Cluster_1484	UUAUUAAUGUCCAAAUCUGUUCUU	24	Medtr4g125440.2	| RNI superfamily protein | HC | chr4:52012499-52008006 | 20130731	2	-1	1	24	653	676	UUAUUAAUGUCCAAAUCUGUUCUU	: ..::::::::.::::::.:	AUCACUGGAUUUGGAUAUUAAUGA	Cleavage	1
Cluster_1486	UAAAAGUAAUGAGUCUUUGAGCCU	24	Medtr4g027070.1	| transmembrane protein, putative | HC | chr4:9319572-9314496 | 20130731	2	-1	1	24	1480	1503	UAAAAGUAAUGAGUCUUUGAGCCU	.::::.::.:.:::::::::.	AAAUUCAAGGAUUUAUUACUUUUG	Cleavage	1
Cluster_1488	UCAGAUAAUCCGGAUAGAAACCG	23	Medtr4g127380.1	| poly(rC)-binding-like protein | HC | chr4:52864244-52858917 | 20130731	2	-1	1	23	467	489	UCAGAUAAUCCGGAUAGAAACCG	: ::::::::::::::::	AAACGUGUAUCCGGAUUAUCUGA	Cleavage	1
Cluster_1488	UCAGAUAAUCCGGAUAGAAACCG	23	Medtr2g080280.1	| hypothetical protein | LC | chr2:33887397-33892802 | 20130731	2	-1	1	23	460	482	UCAGAUAAUCCGGAUAGAAACCG	::: ::.::::::::::.:::	AAGUUGCUGUCCGGAUUAUUUGA	Cleavage	1
Cluster_1494	UUUGUCUGUAUCAUCGAUUGGCCC	24	Medtr1g037490.1	| DIL domain myosin family protein, putative | LC | chr1:13842900-13836798 | 20130731	2	-1	1	24	799	822	UUUGUCUGUAUCAUCGAUUGGCCC	:::.::::::::::: :::	AAGAAAAUUGAUGAUACAGAGAAA	Cleavage	1
Cluster_1494	UUUGUCUGUAUCAUCGAUUGGCCC	24	Medtr1g007420.1	| serine esterase family protein, putative | HC | chr1:346727-359190 | 20130731	2	-1	1	24	604	627	UUUGUCUGUAUCAUCGAUUGGCCC	:: .::.::::::::::::::	UGGAGGAUUGAUGAUACAGACAAC	Cleavage	1
Cluster_1499	UGAUUGUAGGUAAUCCCUUGUCCC	24	Medtr1g011840.1	| boron transporter-like protein | HC | chr1:2231939-2236207 | 20130731	2	-1	1	24	581	604	UGAUUGUAGGUAAUCCCUUGUCCC	:: :::::::.:.::::::	AUACAAAUGGAUUACUUGCAAUCA	Cleavage	1
Cluster_1501	UUUUCUCCUACAUUUGCAGCCU	22	Medtr7g062890.1	| L-type lectin-domain receptor kinase IV.2-like protein | HC | chr7:22876446-22874295 | 20130731	2	-1	1	22	1627	1648	UUUUCUCCUACAUUUGCAGCCU	.::: ::::::::.:::::	CUAUUGCCAAUGUAGGGGAAAA	Cleavage	1
Cluster_1501	UUUUCUCCUACAUUUGCAGCCU	22	Medtr7g062900.1	| lectin-like receptor kinase family protein, putative | HC | chr7:22882298-22879141 | 20130731	2	-1	1	22	1496	1517	UUUUCUCCUACAUUUGCAGCCU	.::: ::::::::.:::::	CUAUUGCUAAUGUAGGGGAAAA	Cleavage	1
Cluster_1513	UUUAUUUGUUCUACUACUUCCU	22	Medtr4g114110.1	| galactose oxidase/kelch repeat protein | HC | chr4:46975122-46976787 | 20130731	2	-1	1	22	606	627	UUUAUUUGUUCUACUACUUCCU	:::: :::::::::::::	UUAUAGUACUAGAACAAAUAAA	Cleavage	1
Cluster_1513	UUUAUUUGUUCUACUACUUCCU	22	Medtr3g462060.1	| import receptor subunit TOM7-1 | HC | chr3:24744848-24746536 | 20130731	2	-1	1	22	462	483	UUUAUUUGUUCUACUACUUCCU	:::::::::::.::::: :	CUUAAGUAGUAGAAUAAAUACA	Cleavage	1
Cluster_1514	UGAAUGAAUUGAUUCCUGUUGGACA	25	Medtr1g111250.1	| aluminum activated malate transporter family protein | HC | chr1:50242818-50245806 | 20130731	2	-1	1	25	19	43	UGAAUGAAUUGAUUCCUGUUGGACA	: ::: :::::..::::::::	UCAGCUACAAGAAUCGGUUCAUUCA	Cleavage	1
Cluster_1514	UGAAUGAAUUGAUUCCUGUUGGACA	25	Medtr1g022015.1	| PPPDE thiol peptidase family protein, putative | HC | chr1:6762348-6760070 | 20130731	2	-1	1	25	46	70	UGAAUGAAUUGAUUCCUGUUGGACA	:..::: :::::::::::::::	AAUUUAACCAGAAUCAAUUCAUUCA	Cleavage	1
Cluster_1516	UCAUUCAUCUCCAGAUAUG	19	Medtr5g073810.1	| transmembrane protein, putative | LC | chr5:31378588-31380120 | 20130731	2	-1	1	19	64	82	UCAUUCAUCUCCAGAUAUG	:: ::.::::::::.::::	CAAAUUUGGAGAUGGAUGA	Cleavage	1
Cluster_1534	GAGGAUAUGAAUUUUGUAAAAA	22	Medtr4g076570.1	| glycoside hydrolase family 17 protein | HC | chr4:29287150-29289422 | 20130731	2	-1	1	22	469	490	GAGGAUAUGAAUUUUGUAAAAA	:: ::: .::.:::::::::::	UUGUUAGGAAGUUCAUAUCCUC	Cleavage	1
Cluster_1535	UUUCCAGUUGUCGAACUUUCAACU	24	Medtr7g056147.3	| RPM1 interacting protein 4 transcript protein | HC | chr7:19567292-19571440 | 20130731	2	-1	1	24	336	359	UUUCCAGUUGUCGAACUUUCAACU	::::::.:.:::.:::.::	GUUCCAAAGUUUGGCAAUUGGGAA	Cleavage	1
Cluster_1535	UUUCCAGUUGUCGAACUUUCAACU	24	Medtr7g056147.2	| RPM1 interacting protein 4 transcript protein | HC | chr7:19567302-19571423 | 20130731	2	-1	1	24	371	394	UUUCCAGUUGUCGAACUUUCAACU	::::::.:.:::.:::.::	GUUCCAAAGUUUGGCAAUUGGGAA	Cleavage	1
Cluster_1535	UUUCCAGUUGUCGAACUUUCAACU	24	Medtr7g056147.1	| RPM1 interacting protein 4 transcript protein | HC | chr7:19567292-19571440 | 20130731	2	-1	1	24	237	260	UUUCCAGUUGUCGAACUUUCAACU	::::::.:.:::.:::.::	GUUCCAAAGUUUGGCAAUUGGGAA	Cleavage	1
Cluster_1538	UGCAGUUGGCACAACGUGCAUCGU	24	Medtr4g124040.2	| ABC transporter B family protein | HC | chr4:51196708-51203159 | 20130731	2	-1	1	24	2279	2302	UGCAGUUGGCACAACGUGCAUCGU	::.:::::::::::::.:	GCAUCACAUGUUGUGCCAACUGUA	Cleavage	1
Cluster_1538	UGCAGUUGGCACAACGUGCAUCGU	24	Medtr4g124040.1	| ABC transporter B family protein | HC | chr4:51195926-51203133 | 20130731	2	-1	1	24	2155	2178	UGCAGUUGGCACAACGUGCAUCGU	::.:::::::::::::.:	GCAUCACAUGUUGUGCCAACUGUA	Cleavage	1
Cluster_1538	UGCAGUUGGCACAACGUGCAUCGU	24	Medtr4g124040.4	| ABC transporter B family protein | HC | chr4:51196708-51203159 | 20130731	2	-1	1	24	2260	2283	UGCAGUUGGCACAACGUGCAUCGU	::.:::::::::::::.:	GCAUCACAUGUUGUGCCAACUGUA	Cleavage	1
Cluster_1538	UGCAGUUGGCACAACGUGCAUCGU	24	Medtr4g124040.5	| ABC transporter B family protein | HC | chr4:51198323-51203159 | 20130731	2	-1	1	24	1668	1691	UGCAGUUGGCACAACGUGCAUCGU	::.:::::::::::::.:	GCAUCACAUGUUGUGCCAACUGUA	Cleavage	1
Cluster_1538	UGCAGUUGGCACAACGUGCAUCGU	24	Medtr4g124040.3	| ABC transporter B family protein | HC | chr4:51196708-51203159 | 20130731	2	-1	1	24	2410	2433	UGCAGUUGGCACAACGUGCAUCGU	::.:::::::::::::.:	GCAUCACAUGUUGUGCCAACUGUA	Cleavage	1
Cluster_1549	AUUCCAUGAAGAUUGUAAAAAUG	23	Medtr7g051040.1	| LRR receptor-like kinase family protein | LC | chr7:17847012-17850039 | 20130731	2	-1	1	23	170	192	AUUCCAUGAAGAUUGUAAAAAUG	:::.. :::::::::::::	AAGCUUUGUUAUCUUCAUGGAAU	Cleavage	1
Cluster_1549	AUUCCAUGAAGAUUGUAAAAAUG	23	Medtr6g080680.1	| F-box protein interaction domain protein | LC | chr6:29011883-29013443 | 20130731	2	-1	1	23	563	585	AUUCCAUGAAGAUUGUAAAAAUG	::::::.:::::::::::: :	AUUUUUUAUAAUCUUCAUGGAUU	Cleavage	1
Cluster_1549	AUUCCAUGAAGAUUGUAAAAAUG	23	Medtr7g045860.1	| LRR receptor-like kinase family protein | LC | chr7:16170530-16174220 | 20130731	2	-1	1	23	240	262	AUUCCAUGAAGAUUGUAAAAAUG	:::.: :::::::::::.:	AAACUUUGCUAUCUUCAUGGAGU	Cleavage	1
Cluster_1549	AUUCCAUGAAGAUUGUAAAAAUG	23	Medtr0289s0040.1	| LRR receptor-like kinase family protein | LC | scaffold0289:19873-16263 | 20130731	2	-1	1	23	152	174	AUUCCAUGAAGAUUGUAAAAAUG	:::.: :::::::::::.:	AAACUUUGCUAUCUUCAUGGAGU	Cleavage	1
Cluster_1557	GAGGAUCUUUCUGUGAUGG	19	Medtr8g067280.1	| basic helix loop helix (bHLH) family transcription factor | HC | chr8:28079487-28082002 | 20130731	2	-1	1	19	592	610	GAGGAUCUUUCUGUGAUGG	.::::..::::::::.:::	UCAUCGUAGAAAGAUUCUC	Cleavage	1
Cluster_1559	UGGGAAUGAUCGUUGCAAAUAACC	24	Medtr7g106340.1	| E3 ubiquitin-protein ligase PUB23-like protein | HC | chr7:43262343-43264210 | 20130731	2	-1	1	24	1648	1671	UGGGAAUGAUCGUUGCAAAUAACC	:: ::: :::.:::.:::::::	UUUUUUUUCCAAUGAUUAUUCCCA	Cleavage	1
Cluster_1559	UGGGAAUGAUCGUUGCAAAUAACC	24	Medtr4g094705.1	| E3 ubiquitin-protein ligase UPL1-like protein | HC | chr4:38771658-38789707 | 20130731	2	-1	1	24	1229	1252	UGGGAAUGAUCGUUGCAAAUAACC	: : ::::: ::::::.:::::.	UGCUCUUUGCCACGAUCGUUCCCG	Cleavage	1
Cluster_1572	UUCAAAGGACUUUCAGAAAUGAA	23	Medtr8g099820.1	| SAM domain protein | HC | chr8:40339866-40341595 | 20130731	2	-1	1	23	781	803	UUCAAAGGACUUUCAGAAAUGAA	: ::: ::::::::::::::	GAAAAUUCGGAAAGUCCUUUGAA	Cleavage	1
Cluster_1572	UUCAAAGGACUUUCAGAAAUGAA	23	Medtr8g099820.2	| SAM domain protein | HC | chr8:40339866-40341595 | 20130731	2	-1	1	23	697	719	UUCAAAGGACUUUCAGAAAUGAA	: ::: ::::::::::::::	GAAAAUUCGGAAAGUCCUUUGAA	Cleavage	1
Cluster_1590	UCGCAUCAGCAAAUGGAUGAUG	22	Medtr0663s0010.1	| transmembrane protein, putative | LC | scaffold0663:172-3541 | 20130731	2	-1	1	22	1173	1194	UCGCAUCAGCAAAUGGAUGAUG	.::::: :::::::::::::	GGUCAUCAUUUUGCUGAUGCGA	Cleavage	1
Cluster_1619	UUCCAAGGAUCAAUCUUCUGAACA	24	Medtr4g045577.1	| protein transporter Sec31 | HC | chr4:15341247-15326633 | 20130731	2	-1	1	24	617	640	UUCCAAGGAUCAAUCUUCUGAACA	.::: :::::::.::::::	CGACGGGAAUAUUGAUCUUUGGAA	Cleavage	1
Cluster_164	UUUUGAGAUUGUGAGGAAG	19	Medtr6g015190.1	| LRR receptor-like kinase family protein | HC | chr6:4927761-4923884 | 20130731	2	-1	1	19	78	96	UUUUGAGAUUGUGAGGAAG	: ::.:::::::.::::::	CAUCUUCACAAUUUCAAAA	Cleavage	1
Cluster_164	UUUUGAGAUUGUGAGGAAG	19	Medtr3g110660.2	| transmembrane amino acid transporter family protein | HC | chr3:51720687-51715143 | 20130731	2	-1	1	19	1592	1610	UUUUGAGAUUGUGAGGAAG	::: ::::..:::::::::	CUUGCUCAUGAUCUCAAAA	Cleavage	1
Cluster_164	UUUUGAGAUUGUGAGGAAG	19	Medtr7g082940.1	| eukaryotic translation initiation factor 5 | HC | chr7:31827109-31830205 | 20130731	2	-1	1	19	97	115	UUUUGAGAUUGUGAGGAAG	: :.::::.::::::::::	CGUUCUCAUAAUCUCAAAA	Cleavage	1
Cluster_164	UUUUGAGAUUGUGAGGAAG	19	Medtr1g058110.1	| RNA recognition motif, a.k.a. RRM, RBD protein | HC | chr1:25574711-25576708 | 20130731	2	-1	1	19	1238	1256	UUUUGAGAUUGUGAGGAAG	:::::::: :::::::.::	CUUCCUCAAAAUCUCAGAA	Translation	1
Cluster_164	UUUUGAGAUUGUGAGGAAG	19	Medtr3g110660.1	| transmembrane amino acid transporter family protein | HC | chr3:51720687-51715143 | 20130731	2	-1	1	19	1498	1516	UUUUGAGAUUGUGAGGAAG	::: ::::..:::::::::	CUUGCUCAUGAUCUCAAAA	Cleavage	1
Cluster_164	UUUUGAGAUUGUGAGGAAG	19	Medtr1g067210.1	| serine/threonine phosphatase family, 2C domain protein | HC | chr1:28940160-28937740 | 20130731	2	-1	1	19	453	471	UUUUGAGAUUGUGAGGAAG	:::..:..:::::::::::	CUUUUUUGCAAUCUCAAAA	Cleavage	1
Cluster_164	UUUUGAGAUUGUGAGGAAG	19	Medtr7g093350.1	| WRC protein | LC | chr7:37092560-37090326 | 20130731	2	-1	1	19	139	157	UUUUGAGAUUGUGAGGAAG	:: .::.::::::::::::	CUCUCUUACAAUCUCAAAA	Cleavage	1
Cluster_1679	UCAGCAUUGUCUCAGACUAUUGUU	24	Medtr4g043650.1	| glycerol-3-phosphate dehydrogenase | HC | chr4:14625115-14621396 | 20130731	2	-1	1	24	783	806	UCAGCAUUGUCUCAGACUAUUGUU	::::: ::.:::::::.:::	CUUUAUAGUGUGGGACAAUGUUGA	Cleavage	1
Cluster_1679	UCAGCAUUGUCUCAGACUAUUGUU	24	Medtr7g017700.1	| PPR containing plant-like protein | HC | chr7:5672185-5669078 | 20130731	2	-1	1	24	2709	2732	UCAGCAUUGUCUCAGACUAUUGUU	.:::: :::::.::::.:::	CUGUGUAGUGUGAGAUAAUGUUGA	Cleavage	1
Cluster_1682	UGGGCCAGCGAAAUCUAAAUGAGGA	25	Medtr3g014010.1	| 50S ribosomal protein L27 | HC | chr3:3871485-3868099 | 20130731	2	-1	1	25	922	946	UGGGCCAGCGAAAUCUAAAUGAGGA	::::::::::.:.:::..::	AGACAAUUUAGAUUUUGUUGGUUCA	Cleavage	1
Cluster_1683	ACUCAGUUGGGAGAAUAGAGCCU	23	Medtr3g040270.1	| hypothetical protein | LC | chr3:14136758-14136976 | 20130731	2	-1	1	23	147	169	ACUCAGUUGGGAGAAUAGAGCCU	:: :::::.::::.:::::	UGUGUCAAUUCUUCCAAUUGAGU	Cleavage	1
Cluster_1683	ACUCAGUUGGGAGAAUAGAGCCU	23	Medtr1g075680.1	| kinesin motor domain protein | HC | chr1:33531344-33535102 | 20130731	2	-1	1	23	64	86	ACUCAGUUGGGAGAAUAGAGCCU	::: :::::.::::::.::	UCAAUCUUUUCUCUCAACUGGGU	Cleavage	1
Cluster_1683	ACUCAGUUGGGAGAAUAGAGCCU	23	Medtr1g022350.1	| ubiquitin-protein ligase, putative | HC | chr1:7076378-7077932 | 20130731	2	-1	1	23	169	191	ACUCAGUUGGGAGAAUAGAGCCU	.::: ::::::.:.::::::	UUCUUCUCUUCUCCUAGCUGAGU	Cleavage	1
Cluster_1685	UUUUUAGAACUUUCCACCGGGA	22	Medtr6g079140.1	| disease resistance protein (TIR-NBS-LRR class) | HC | chr6:29804255-29799693 | 20130731	2	-1	1	22	1036	1057	UUUUUAGAACUUUCCACCGGGA	:::::::::: :.::::::	AUACGGUGGAAAGCUUUAAAAA	Cleavage	1
Cluster_1685	UUUUUAGAACUUUCCACCGGGA	22	Medtr6g077640.1	| disease resistance protein (TIR-NBS-LRR class) | HC | chr6:28491904-28486386 | 20130731	2	-1	1	22	1095	1116	UUUUUAGAACUUUCCACCGGGA	:::::::::: :.::::::	AUACGGUGGAAAGCUUUAAAAA	Cleavage	1
Cluster_1685	UUUUUAGAACUUUCCACCGGGA	22	Medtr7g116330.1	| ethylene receptor | HC | chr7:47968596-47972494 | 20130731	2	-1	1	22	2842	2863	UUUUUAGAACUUUCCACCGGGA	: : :::: :::::::::::::	UGCAGGUGAAAAGUUCUAAAAA	Cleavage	1
Cluster_1688	AAUCGGAGAUAAAGUACUAUAUU	23	Medtr3g088640.1	| adenine nucleotide alpha hydrolase-like domain kinase | HC | chr3:40375755-40380004 | 20130731	2	-1	1	23	215	237	AAUCGGAGAUAAAGUACUAUAUU	::::::::::.::::.:::	AUCAUAGUACUUUGUCUCUGAUC	Cleavage	1
Cluster_1694	UAUUGUAGAGUGUUGAAAG	19	Medtr1g039410.1	| inosine-uridine preferring nucleoside hydrolase | HC | chr1:14578048-14571756 | 20130731	2	-1	1	19	939	957	UAUUGUAGAGUGUUGAAAG	::: ::..:::::::::::	CUUACAGUACUCUACAAUA	Cleavage	1
Cluster_1694	UAUUGUAGAGUGUUGAAAG	19	Medtr1g039410.2	| inosine-uridine preferring nucleoside hydrolase | HC | chr1:14577878-14571756 | 20130731	2	-1	1	19	882	900	UAUUGUAGAGUGUUGAAAG	::: ::..:::::::::::	CUUACAGUACUCUACAAUA	Cleavage	1
Cluster_1694	UAUUGUAGAGUGUUGAAAG	19	Medtr7g017100.1	| auxin transporter BIG | HC | chr7:5408209-5431808 | 20130731	2	-1	1	19	145	163	UAUUGUAGAGUGUUGAAAG	.:::::::::::::::: :	UUUUCAACACUCUACAAAA	Cleavage	1
Cluster_1694	UAUUGUAGAGUGUUGAAAG	19	Medtr3g078010.1	| CASP ARALYDRAFT-like protein | HC | chr3:35146346-35143714 | 20130731	2	-1	1	19	1270	1288	UAUUGUAGAGUGUUGAAAG	.::::::.:::::..::::	UUUUCAAUACUCUGUAAUA	Cleavage	1
Cluster_1694	UAUUGUAGAGUGUUGAAAG	19	Medtr4g080807.1	| F-box/RNI/FBD-like domain protein | LC | chr4:31268960-31267199 | 20130731	2	-1	1	19	604	622	UAUUGUAGAGUGUUGAAAG	:::::::::.:.::::::	CUUUCAACAUUUUACAAUU	Cleavage	1
Cluster_1695	UAUUAUUCUAAUGAUCAUGGUACU	24	Medtr3g056100.3	| WRKY family transcription factor | HC | chr3:22293041-22298543 | 20130731	2	-1	1	24	28	50	UAUUAUUCUAAUGAUCAUGGUACU	:: ::::: :::::::::::::	UAUAACAUGA-CAUUAGAAUAAUA	Cleavage	1
Cluster_1699	UAGCUUCUUUUAGUGGUGCGGCCU	24	Medtr8g010160.1	| ABI3-interacting protein | HC | chr8:2588108-2583935 | 20130731	2	-1	1	24	2089	2112	UAGCUUCUUUUAGUGGUGCGGCCU	: :.::::::::::::.::	UUCAAGAAUCACUAAAAGAAGUUA	Cleavage	1
Cluster_1699	UAGCUUCUUUUAGUGGUGCGGCCU	24	Medtr8g040975.1	| hypothetical protein | LC | chr8:15422135-15424182 | 20130731	2	-1	1	24	686	709	UAGCUUCUUUUAGUGGUGCGGCCU	:::: :::..:::::::::	CUGAAGCACAACUGGAAGAAGCUA	Cleavage	1
Cluster_1701	UAGCCACUGUUGAUUAUUUGAUG	23	Medtr6g068930.1	| zinc-binding alcohol dehydrogenase family protein | HC | chr6:24778258-24773659 | 20130731	2	-1	1	23	722	744	UAGCCACUGUUGAUUAUUUGAUG	::: .:::::::::::.::	GUCAAAAGGAUCAACAGUGGUUA	Cleavage	1
Cluster_1703	UUCAUAUAAAUAAAUCUGUCUGCU	24	Medtr7g113330.1	| sucrose nonfermenting-like protein | HC | chr7:46661673-46668826 | 20130731	2	-1	1	24	1849	1872	UUCAUAUAAAUAAAUCUGUCUGCU	::::: :::::::::::::	UAUUGACAGUCUUAUUUAUAUGAA	Cleavage	1
Cluster_1709	UCCUCCCUCCCCUAAAGACAAAGCU	25	Medtr1g040450.1	| endonuclease/exonuclease/phosphatase family protein | LC | chr1:18643878-18645237 | 20130731	2	-1	1	25	201	225	UCCUCCCUCCCCUAAAGACAAAGCU	:.: :::::::::: .:::::::	UGUUCAGUCUUUAGGGAGGGGAGGA	Cleavage	1
Cluster_1714	UCUGUAAAUGUCAAGUAUGAGCCU	24	Medtr7g076310.4	| UDP-galactose transporter 1 | HC | chr7:28725572-28729387 | 20130731	2	-1	1	24	1618	1641	UCUGUAAAUGUCAAGUAUGAGCCU	::::::::::.::::::: :	GCUAUCAUACUUGAUAUUUACAAA	Cleavage	1
Cluster_1714	UCUGUAAAUGUCAAGUAUGAGCCU	24	Medtr7g076310.3	| UDP-galactose transporter 1 | HC | chr7:28725502-28729387 | 20130731	2	-1	1	24	1103	1126	UCUGUAAAUGUCAAGUAUGAGCCU	::::::::::.::::::: :	GCUAUCAUACUUGAUAUUUACAAA	Cleavage	1
Cluster_1714	UCUGUAAAUGUCAAGUAUGAGCCU	24	Medtr7g076310.1	| UDP-galactose transporter 1 | HC | chr7:28725473-28729387 | 20130731	2	-1	1	24	863	886	UCUGUAAAUGUCAAGUAUGAGCCU	::::::::::.::::::: :	GCUAUCAUACUUGAUAUUUACAAA	Cleavage	1
Cluster_1714	UCUGUAAAUGUCAAGUAUGAGCCU	24	Medtr7g076310.2	| UDP-galactose transporter 1 | HC | chr7:28725623-28729387 | 20130731	2	-1	1	24	910	933	UCUGUAAAUGUCAAGUAUGAGCCU	::::::::::.::::::: :	GCUAUCAUACUUGAUAUUUACAAA	Cleavage	1
Cluster_1719	UAUUACUAUUGAAGUUGGUG	20	Medtr3g083760.2	| Lipid transfer protein | HC | chr3:37789571-37787523 | 20130731	2	-1	1	20	668	687	UAUUACUAUUGAAGUUGGUG	:..:::::.:.::::::::	AAUUAACUUUAGUAGUAAUA	Cleavage	1
Cluster_1719	UAUUACUAUUGAAGUUGGUG	20	Medtr7g029535.1	| F-box/LRR protein, putative | LC | chr7:10616294-10614486 | 20130731	2	-1	1	20	588	607	UAUUACUAUUGAAGUUGGUG	:.:.:::::::::::::.:.	CGCUAACUUCAAUAGUAGUG	Cleavage	1
Cluster_1759	UGGAGGACGUGGAAUAUCAGGCCU	24	Medtr7g117270.1	| plant organelle RNA recognition domain protein | HC | chr7:48441549-48444050 | 20130731	2	-1	1	24	1451	1474	UGGAGGACGUGGAAUAUCAGGCCU	: .:::::::::::::..:::	UUGGUUGAUAUUCCACGUUUUCCU	Cleavage	1
Cluster_1763	UCCAGUGAUCGUAGAAAGACGAUUU	25	Medtr4g113650.1	| cytochrome P450 family 709 protein | HC | chr4:46750295-46754779 | 20130731	2	-1	1	25	483	507	UCCAGUGAUCGUAGAAAGACGAUUU	::::::::. :::::::::	GUCCUUUCUUUCUAUCAUCACUGGA	Translation	1
Cluster_1771	UUCCAAGGAUCAAUUUUCUGAACA	24	Medtr4g084640.1	| sulfate/bicarbonate/oxalate exchanger and transporter sat-1 | HC | chr4:32965389-32969290 | 20130731	2	-1	1	24	173	196	UUCCAAGGAUCAAUUUUCUGAACA	::::::::: :::::::::.	GUAACAGAAAAUUAAUCCUUGGAG	Translation	1
Cluster_1771	UUCCAAGGAUCAAUUUUCUGAACA	24	Medtr1g045550.1	| ammonium transporter 1 protein | HC | chr1:17091732-17089551 | 20130731	2	-1	1	24	1895	1918	UUCCAAGGAUCAAUUUUCUGAACA	.: :::::::.:.:::::::	GUAGUAAAAAAUUGGUUCUUGGAA	Cleavage	1
Cluster_1771	UUCCAAGGAUCAAUUUUCUGAACA	24	Medtr4g094268.1	| saccharopine dehydrogenase-like protein | HC | chr4:37581623-37578406 | 20130731	2	-1	1	24	892	915	UUCCAAGGAUCAAUUUUCUGAACA	:::::::::.::.::::..	CCAGAAGAAAAUUGGUCUUUGGGG	Cleavage	1
Cluster_1771	UUCCAAGGAUCAAUUUUCUGAACA	24	Medtr4g045577.1	| protein transporter Sec31 | HC | chr4:15341247-15326633 | 20130731	2	-1	1	24	617	640	UUCCAAGGAUCAAUUUUCUGAACA	.::: :::::::.::::::	CGACGGGAAUAUUGAUCUUUGGAA	Cleavage	1
Cluster_1773	UUUCACAUUUAACGUUUAUGGAUG	24	Medtr5g070090.1	| UDP-glucosyltransferase family protein | HC | chr5:29700515-29702410 | 20130731	2	-1	1	24	1726	1749	UUUCACAUUUAACGUUUAUGGAUG	::::: :::.::::::.::	AAAGAAUAAAAGUUGAAUGUGGAA	Cleavage	1
Cluster_1775	UCAGCAUUGUCUCAGACUAUUGUU	24	Medtr4g043650.1	| glycerol-3-phosphate dehydrogenase | HC | chr4:14625115-14621396 | 20130731	2	-1	1	24	783	806	UCAGCAUUGUCUCAGACUAUUGUU	::::: ::.:::::::.:::	CUUUAUAGUGUGGGACAAUGUUGA	Cleavage	1
Cluster_1775	UCAGCAUUGUCUCAGACUAUUGUU	24	Medtr7g017700.1	| PPR containing plant-like protein | HC | chr7:5672185-5669078 | 20130731	2	-1	1	24	2709	2732	UCAGCAUUGUCUCAGACUAUUGUU	.:::: :::::.::::.:::	CUGUGUAGUGUGAGAUAAUGUUGA	Cleavage	1
Cluster_18	UUCCUAGUUCUCAUACUGUAGCU	23	Medtr3g007670.1	| hypothetical protein | HC | chr3:1113603-1116320 | 20130731	2	-1	1	23	53	74	UUCCUAGUUCUCAUACUGUAGCU	::: : :::.::::::.::::::	AGC-AGAGUGUGAGAAUUAGGAA	Cleavage	1
Cluster_181	AGGACGAGAAGAAACUGAACAGG	23	Medtr2g038860.1	| xyloglucan endotransglucosylase/hydrolase family protein | HC | chr2:17011967-17013677 | 20130731	2	-1	1	23	674	696	AGGACGAGAAGAAACUGAACAGG	:.: ::::: :::::::.::.::	CUUCUUCAGGUUCUUCUUGUUCU	Cleavage	1
Cluster_181	AGGACGAGAAGAAACUGAACAGG	23	Medtr2g038705.1	| xyloglucan endotransglucosylase/hydrolase family protein | HC | chr2:16941205-16943052 | 20130731	2	-1	1	23	771	793	AGGACGAGAAGAAACUGAACAGG	:.: ::::: :::::::.::.::	CUUCUUCAGGUUCUUCUUGUUCU	Cleavage	1
Cluster_181	AGGACGAGAAGAAACUGAACAGG	23	Medtr7g060760.1	| pectinacetylesterase family protein | HC | chr7:21963347-21967207 | 20130731	2	-1	1	23	356	378	AGGACGAGAAGAAACUGAACAGG	:::: ::::::::.::.::	GCAAUUCAAUUUCUUCUUGUUCU	Cleavage	1
Cluster_181	AGGACGAGAAGAAACUGAACAGG	23	Medtr3g099490.1	| hypothetical protein | HC | chr3:45609431-45608714 | 20130731	2	-1	1	23	271	293	AGGACGAGAAGAAACUGAACAGG	::: ::::: :::::::.::.::	CCUCUUCAGCUUCUUCUUGUUCU	Cleavage	1
Cluster_1821	UGAUAUGAACUCCAUUCCAAGAGAA	25	Medtr6g077460.1	| disease resistance protein (TIR-NBS-LRR class) family protein, putative | LC | chr6:29872884-29871855 | 20130731	2	-1	1	25	682	706	UGAUAUGAACUCCAUUCCAAGAGAA	:::: :::::::.::.:::	AUCAAAUGGACUGGAGUUUAUGUCA	Cleavage	1
Cluster_1829	UGGCAUAUCAAAGGUGAUG	19	Medtr6g038730.1	| disease resistance family protein/LRR protein, putative | LC | chr6:13890399-13893951 | 20130731	2	-1	1	19	914	932	UGGCAUAUCAAAGGUGAUG	:::::.::::::::: :::	CAUCAUCUUUGAUAUUCCA	Cleavage	1
Cluster_1834	UGAGUAGAGAUCUUGAAUUGUGGU	24	Medtr7g088440.1	| alpha-L-arabinofuranosidase-like protein | HC | chr7:34446078-34451673 | 20130731	2	-1	1	24	1740	1763	UGAGUAGAGAUCUUGAAUUGUGGU	: .. : ::::::::.::::.:::	AGUGGAUUUCAAGAUUUCUAUUCA	Cleavage	1
Cluster_1834	UGAGUAGAGAUCUUGAAUUGUGGU	24	Medtr0274s0010.1	| LRR receptor-like kinase | LC | scaffold0274:4395-2035 | 20130731	2	-1	1	24	553	576	UGAGUAGAGAUCUUGAAUUGUGGU	:: :::::::::::::.:.:	AAGUCACUUCAAGAUCUCUAUUUA	Cleavage	1
Cluster_1834	UGAGUAGAGAUCUUGAAUUGUGGU	24	Medtr0640s0020.1	| leucine-rich receptor-like kinase family protein | LC | scaffold0640:4582-6972 | 20130731	2	-1	1	24	1141	1164	UGAGUAGAGAUCUUGAAUUGUGGU	:: :: :::::::::::::.:.:	ACGUCACUUCAAGAUCUCUAUUUA	Cleavage	1
Cluster_1834	UGAGUAGAGAUCUUGAAUUGUGGU	24	Medtr0648s0020.1	| LRR receptor-like kinase | LC | scaffold0648:4285-2001 | 20130731	2	-1	1	24	457	480	UGAGUAGAGAUCUUGAAUUGUGGU	: .:::: ::::::::::::.:.:	AAUACAAAUCAAGAUCUCUAUUUA	Cleavage	1
Cluster_1845	UACAUAUAAUCCAAAUUGACUGUU	24	Medtr3g095580.1	| tyrosine kinase family protein | LC | chr3:43678203-43681645 | 20130731	2	-1	1	24	380	403	UACAUAUAAUCCAAAUUGACUGUU	:..:::::::::.:.::::	CUGGAUUGAUUUGGAUUGUGUGUA	Cleavage	1
Cluster_1862	AAAACUGAUCACCAAGAUCUGCACC	25	Medtr1g081180.1	| trihelix transcription factor | HC | chr1:36129455-36127007 | 20130731	2	-1	1	25	1917	1941	AAAACUGAUCACCAAGAUCUGCACC	: ..:::.::: :::::::::::	UCUUUGGAUUUUGAUGAUCAGUUUU	Cleavage	1
Cluster_188	UGACUACCUCAAACAUGCCUUGG	23	Medtr2g049420.3	| NLI interacting factor-like phosphatase | HC | chr2:21784876-21781369 | 20130731	2	-1	1	23	770	792	UGACUACCUCAAACAUGCCUUGG	:: .::::::::::::::.:	AUCAGAUAUGUUUGAGGUAGUUA	Cleavage	1
Cluster_188	UGACUACCUCAAACAUGCCUUGG	23	Medtr2g049420.1	| NLI interacting factor-like phosphatase | HC | chr2:21789410-21781268 | 20130731	2	-1	1	23	1234	1256	UGACUACCUCAAACAUGCCUUGG	:: .::::::::::::::.:	AUCAGAUAUGUUUGAGGUAGUUA	Cleavage	1
Cluster_188	UGACUACCUCAAACAUGCCUUGG	23	Medtr2g049420.2	| NLI interacting factor-like phosphatase | HC | chr2:21789410-21781268 | 20130731	2	-1	1	23	1207	1229	UGACUACCUCAAACAUGCCUUGG	:: .::::::::::::::.:	AUCAGAUAUGUUUGAGGUAGUUA	Cleavage	1
Cluster_1880	UUUCCGACUGUAAUGAAUUACA	22	Medtr4g094360.2	| nodulin MtN21/EamA-like transporter family protein | HC | chr4:37817633-37821747 | 20130731	2	-1	1	22	1091	1112	UUUCCGACUGUAAUGAAUUACA	::: :::::::::.::::.	AUGAAUACAUUACAGUUGGAAG	Cleavage	1
Cluster_1880	UUUCCGACUGUAAUGAAUUACA	22	Medtr4g094360.3	| nodulin MtN21/EamA-like transporter family protein | HC | chr4:37817599-37821747 | 20130731	2	-1	1	22	980	1001	UUUCCGACUGUAAUGAAUUACA	::: :::::::::.::::.	AUGAAUACAUUACAGUUGGAAG	Cleavage	1
Cluster_1880	UUUCCGACUGUAAUGAAUUACA	22	Medtr4g094360.1	| nodulin MtN21/EamA-like transporter family protein | HC | chr4:37819833-37821703 | 20130731	2	-1	1	22	779	800	UUUCCGACUGUAAUGAAUUACA	::: :::::::::.::::.	AUGAAUACAUUACAGUUGGAAG	Cleavage	1
Cluster_1891	UAUGGACCGUCUCCUGACAGGACA	24	Medtr7g072070.1	| PPR containing plant-like protein | HC | chr7:26781971-26778389 | 20130731	2	-1	1	24	2317	2340	UAUGGACCGUCUCCUGACAGGACA	:: .::::::::::.::::	GAGUAUGCUAGGAGACGGUUCAUA	Cleavage	1
Cluster_1894	UAUCAAAGUAGAAUGGAAAG	20	Medtr8g073540.1	| undecaprenyl pyrophosphate synthase | HC | chr8:31155356-31158135 | 20130731	2	-1	1	20	1419	1438	UAUCAAAGUAGAAUGGAAAG	:::..:::.:::::::::.	GUUUUUAUUUUACUUUGAUG	Cleavage	1
Cluster_1894	UAUCAAAGUAGAAUGGAAAG	20	Medtr8g073540.2	| undecaprenyl pyrophosphate synthase | HC | chr8:31155573-31158135 | 20130731	2	-1	1	20	1492	1511	UAUCAAAGUAGAAUGGAAAG	:::..:::.:::::::::.	GUUUUUAUUUUACUUUGAUG	Cleavage	1
Cluster_1894	UAUCAAAGUAGAAUGGAAAG	20	Medtr4g121877.1	| 60S ribosomal protein L29-1 | HC | chr4:50288580-50289335 | 20130731	2	-1	1	20	353	372	UAUCAAAGUAGAAUGGAAAG	:::: ::::::.::::::.	AUUUCAAUUCUAUUUUGAUG	Cleavage	1
Cluster_1908	UCAUCUGAAAUGUAGCCUAGGACC	24	Medtr2g027130.1	| WEB family plant protein | HC | chr2:9882169-9884813 | 20130731	2	-1	1	24	585	608	UCAUCUGAAAUGUAGCCUAGGACC	: ::::.:::::::::::.	CGAAAUUGGCUGCAUUUCAGAUGG	Cleavage	1
Cluster_1908	UCAUCUGAAAUGUAGCCUAGGACC	24	Medtr8g085310.1	| Myb/SANT-like DNA-binding domain protein | LC | chr8:35335744-35339199 | 20130731	2	-1	1	24	2004	2027	UCAUCUGAAAUGUAGCCUAGGACC	:::: :::::::::::::	AGAGAUAGGAGACAUUUCAGAUGA	Cleavage	1
Cluster_1912	UCUCGAGCAAGAUUUCAAAGACUU	24	Medtr3g072810.1	| flavonol synthase/flavanone 3-hydroxylase | HC | chr3:32765050-32763793 | 20130731	2	-1	1	24	570	593	UCUCGAGCAAGAUUUCAAAGACUU	::: :::::::.:::::.:.:.::	AAGACUUUGAAGUCUUGUUUGGGA	Cleavage	1
Cluster_1915	UCAAUACGAACAGGAACCAAGACCC	25	Medtr3g056190.1	| NB-ARC domain disease resistance protein | LC | chr3:22359292-22355365 | 20130731	2	-1	1	25	3265	3289	UCAAUACGAACAGGAACCAAGACCC	: : .:::::: .::::.:::::::	GAGGUUUGGUUGUUGUUUGUAUUGA	Cleavage	1
Cluster_1916	UCAUAAACUGAUACAUGAAGGCCU	24	Medtr3g053690.1	| ethylene response factor | HC | chr3:21358224-21361945 | 20130731	2	-1	1	24	1105	1128	UCAUAAACUGAUACAUGAAGGCCU	::::::::::..::::.::.	UGAACUUCAUGUAUUGGUUUGUGG	Cleavage	1
Cluster_1917	UCUGUUGUAAUUUUGUCCUUGGUA	24	Medtr3g074080.1	| ser/thr-rich protein T10 in DGCR region-like protein | LC | chr3:33453395-33449150 | 20130731	2	-1	1	24	613	636	UCUGUUGUAAUUUUGUCCUUGGUA	:. ::::::::::::: :.::::	AAUGAAGGACAAAAUUAAAGCAGA	Cleavage	1
Cluster_1934	AACUUGGUAUUUUAAGACG	19	Medtr5g043800.1	| LRR receptor-like kinase | HC | chr5:19248229-19243573 | 20130731	2	-1	1	19	613	631	AACUUGGUAUUUUAAGACG	:::::::::::::.:: ::	CGUCUUAAAAUACUAAAUU	Cleavage	1
Cluster_1944	UACGGACCAUAUCCCAACAGGACA	24	Medtr2g098830.2	| aleurone layer morphogenesis protein | LC | chr2:42307950-42316489 | 20130731	2	-1	1	24	2458	2481	UACGGACCAUAUCCCAACAGGACA	::: ::::.::::::::::.	ACCACUGAUGGGGUAUGGUCCGUG	Cleavage	1
Cluster_1944	UACGGACCAUAUCCCAACAGGACA	24	Medtr2g098830.1	| aleurone layer morphogenesis protein | LC | chr2:42304780-42316504 | 20130731	2	-1	1	24	3343	3366	UACGGACCAUAUCCCAACAGGACA	::: ::::.::::::::::.	ACCACUGAUGGGGUAUGGUCCGUG	Cleavage	1
Cluster_1946	UCUAAUAAUCCAAGCUGUUGUACU	24	Medtr5g084950.1	| triacylglycerol lipase-like protein | HC | chr5:36646799-36643552 | 20130731	2	-1	1	24	414	437	UCUAAUAAUCCAAGCUGUUGUACU	:.::::::: ::::::::.::	CUAAUAACAGCUCGGAUUAUUGGA	Cleavage	1
Cluster_1946	UCUAAUAAUCCAAGCUGUUGUACU	24	Medtr5g006650.1	| triacylglycerol lipase, putative | HC | chr5:1018925-1020764 | 20130731	2	-1	1	24	356	379	UCUAAUAAUCCAAGCUGUUGUACU	:.::::::: ::::::::.::	CUAAUAACAGCUCGGAUUAUUGGA	Cleavage	1
Cluster_1947	AAUUCGUAUGUCGACGUCUUGAC	23	Medtr7g113010.1	| epoxide hydrolase | LC | chr7:46517120-46512026 | 20130731	2	-1	1	23	1393	1415	AAUUCGUAUGUCGACGUCUUGAC	..::::: ::.::::.:::::	UCUGAGACGGCGGCAUAUGAAUU	Cleavage	1
Cluster_1992	UAUAAAUAUCUACUUGGCUACUG	23	Medtr1g060590.1	| calmodulin-binding family protein | HC | chr1:26377825-26373830 | 20130731	2	-1	1	23	910	932	UAUAAAUAUCUACUUGGCUACUG	:: :::::::.:::::::.::	AAGAUGCCAAGUGGAUAUUUGUA	Cleavage	1
Cluster_1993	UCUACUUUCAUGGAGGACU	19	Medtr4g121140.1	| carboxy-terminal domain phosphatase-like protein | HC | chr4:50177925-50171180 | 20130731	2	-1	1	19	367	385	UCUACUUUCAUGGAGGACU	:::: :::.::::.:::::	AGUCAUCCGUGAAGGUAGA	Cleavage	1
Cluster_1993	UCUACUUUCAUGGAGGACU	19	Medtr4g121140.2	| carboxy-terminal domain phosphatase-like protein | HC | chr4:50177908-50171229 | 20130731	2	-1	1	19	341	359	UCUACUUUCAUGGAGGACU	:::: :::.::::.:::::	AGUCAUCCGUGAAGGUAGA	Cleavage	1
Cluster_2005	UACAUAUUCGAAUUUCAGGAGAUG	24	Medtr1g007810.1	| glycoside hydrolase family 17 protein | HC | chr1:575699-577522 | 20130731	2	-1	1	24	1186	1209	UACAUAUUCGAAUUUCAGGAGAUG	:: ..:::::::.::::.::::	UUUCGUUUGAAAUUUGAAUGUGUA	Cleavage	1
Cluster_201	UAUAUUAUAUGCUUGCCUUGAAGCC	25	Medtr7g058930.1	| male sterility MS5 family protein | HC | chr7:21253696-21249411 | 20130731	2	-1	1	25	77	101	UAUAUUAUAUGCUUGCCUUGAAGCC	:: :: ::::::::.::::.::	AACUCAAAAGCAAGCAUGUAAUGUA	Cleavage	1
Cluster_202	UCUGAUUGAUCUGAUUGAAGGCCU	24	Medtr4g064110.1	| OSBP(oxysterol-binding protein)-related protein 4C | HC | chr4:23895514-23901694 | 20130731	2	-1	1	24	475	498	UCUGAUUGAUCUGAUUGAAGGCCU	:::: :::::::::::::	GUUAGAUCAAGCAGAUCAAUCAGA	Cleavage	1
Cluster_2039	UCACCUGUAGAGUUGUAUCACU	22	Medtr2g045700.1	| bZIP transcription factor | LC | chr2:20030136-20027717 | 20130731	2	-1	1	22	104	125	UCACCUGUAGAGUUGUAUCACU	: ::::::::: :.:::::::	UGGGAUACAACUAUGCAGGUGA	Translation	1
Cluster_2042	UUUCUUCGUCUGUAAUAUGAUG	22	Medtr4g026070.1	| cytochrome P450 family 71 protein | LC | chr4:8975279-8977558 | 20130731	2	-1	1	22	778	799	UUUCUUCGUCUGUAAUAUGAUG	: :: ::::::::.::::::.	GAACAAAUUACAGAUGAAGAAG	Cleavage	1
Cluster_2042	UUUCUUCGUCUGUAAUAUGAUG	22	Medtr4g024830.1	| F-box/RNI/FBD-like domain protein | LC | chr4:8415912-8417670 | 20130731	2	-1	1	22	880	901	UUUCUUCGUCUGUAAUAUGAUG	: ::: :::::::.::::::.	AAGCAUUUUACAGAUGAAGAAG	Cleavage	1
Cluster_2042	UUUCUUCGUCUGUAAUAUGAUG	22	Medtr4g026200.1	| cytochrome P450 family 71 protein | LC | chr4:9026952-9031194 | 20130731	2	-1	1	22	857	878	UUUCUUCGUCUGUAAUAUGAUG	: :: ::::::::.::::::.	GAACAAAUUACAGAUGAAGAAG	Cleavage	1
Cluster_2049	UAGAAGAUGAAUAUGGAUG	19	Medtr5g054950.2	| auxin efflux carrier family protein | HC | chr5:22625535-22623238 | 20130731	2	-1	1	19	1720	1738	UAGAAGAUGAAUAUGGAUG	:: :::::::.:::::.::	CAACCAUAUUUAUCUUUUA	Cleavage	1
Cluster_2049	UAGAAGAUGAAUAUGGAUG	19	Medtr5g054950.1	| auxin efflux carrier family protein | HC | chr5:22625535-22623226 | 20130731	2	-1	1	19	1720	1738	UAGAAGAUGAAUAUGGAUG	:: :::::::.:::::.::	CAACCAUAUUUAUCUUUUA	Cleavage	1
Cluster_206	UUUUCUUUCCUGCUAACGUUACU	23	Medtr5g096490.3	| 50S ribosomal protein L14p | HC | chr5:42189069-42188426 | 20130731	2	-1	1	23	105	127	UUUUCUUUCCUGCUAACGUUACU	.::::.:::::.::::::.	ACGCGCGUUGGCAGGGAAGAAAG	Cleavage	1
Cluster_206	UUUUCUUUCCUGCUAACGUUACU	23	Medtr5g096490.1	| 50S ribosomal protein L14p | HC | chr5:42191371-42188426 | 20130731	2	-1	1	23	204	226	UUUUCUUUCCUGCUAACGUUACU	.::::.:::::.::::::.	ACGCGCGUUGGCAGGGAAGAAAG	Cleavage	1
Cluster_206	UUUUCUUUCCUGCUAACGUUACU	23	Medtr5g096490.2	| 50S ribosomal protein L14p | HC | chr5:42189069-42188426 | 20130731	2	-1	1	23	105	127	UUUUCUUUCCUGCUAACGUUACU	.::::.:::::.::::::.	ACGCGCGUUGGCAGGGAAGAAAG	Cleavage	1
Cluster_206	UUUUCUUUCCUGCUAACGUUACU	23	Medtr5g007240.1	| 50S ribosomal protein L14p | HC | chr5:1256398-1253985 | 20130731	2	-1	1	23	204	226	UUUUCUUUCCUGCUAACGUUACU	.::::.:::::.::::::.	ACGCGCGUUGGCAGGGAAGAAAG	Cleavage	1
Cluster_2066	UACAUAGUCCAGGACCAACAUAACC	25	Medtr3g116210.1	| hypothetical protein | LC | chr3:54333346-54332573 | 20130731	2	-1	1	25	289	313	UACAUAGUCCAGGACCAACAUAACC	: :::::::..:::.::.::::	AACUUUGUUGGUUUUGGGCUGUGUA	Cleavage	1
Cluster_2069	UUUUUCCAAUGGACUGCAGUCAAU	24	Medtr4g057685.1	| lactoylglutathione lyase-like protein | HC | chr4:21217095-21208948 | 20130731	2	-1	1	24	1022	1045	UUUUUCCAAUGGACUGCAGUCAAU	:: :::::::: :::::::::.	UGUGUCUGCAGUCAAUUGGAAAAG	Translation	1
Cluster_2069	UUUUUCCAAUGGACUGCAGUCAAU	24	Medtr4g057685.2	| lactoylglutathione lyase-like protein | HC | chr4:21217149-21208948 | 20130731	2	-1	1	24	936	959	UUUUUCCAAUGGACUGCAGUCAAU	:: :::::::: :::::::::.	UGUGUCUGCAGUCAAUUGGAAAAG	Translation	1
Cluster_2069	UUUUUCCAAUGGACUGCAGUCAAU	24	Medtr4g057685.4	| lactoylglutathione lyase-like protein | HC | chr4:21217095-21208948 | 20130731	2	-1	1	24	918	941	UUUUUCCAAUGGACUGCAGUCAAU	:: :::::::: :::::::::.	UGUGUCUGCAGUCAAUUGGAAAAG	Translation	1
Cluster_2069	UUUUUCCAAUGGACUGCAGUCAAU	24	Medtr4g057685.5	| lactoylglutathione lyase-like protein | HC | chr4:21217095-21208948 | 20130731	2	-1	1	24	902	925	UUUUUCCAAUGGACUGCAGUCAAU	:: :::::::: :::::::::.	UGUGUCUGCAGUCAAUUGGAAAAG	Translation	1
Cluster_207	UCAGUGAUUUUCUUAGGUCGGCCU	24	Medtr3g022850.1	| crossover junction endonuclease MUS81-like protein | HC | chr3:6876038-6866010 | 20130731	2	-1	1	24	1305	1328	UCAGUGAUUUUCUUAGGUCGGCCU	:::.:::.::::::.:.:::	AUCGCGAUCUAGGAAAAUUAUUGA	Cleavage	1
Cluster_207	UCAGUGAUUUUCUUAGGUCGGCCU	24	Medtr4g037530.1	| hypothetical protein | HC | chr4:14979427-14977961 | 20130731	2	-1	1	24	231	254	UCAGUGAUUUUCUUAGGUCGGCCU	: :. ::. :::::::::::.:::	ACGUGGAUAUAAGAAAAUCAUUGA	Cleavage	1
Cluster_2079	UGCCGAUAAUUCAUGACUGUGAGCU	25	Medtr5g078410.1	| IBR domain protein | LC | chr5:33533166-33531953 | 20130731	2	-1	1	25	791	815	UGCCGAUAAUUCAUGACUGUGAGCU	.:: ::::: .:::::::.::::::	GGCACACAGAUAUGAAUUGUCGGCA	Cleavage	1
Cluster_2079	UGCCGAUAAUUCAUGACUGUGAGCU	25	Medtr2g038640.1	| zinc finger, C3HC4 type (RING finger) protein | LC | chr2:16868181-16869732 | 20130731	2	-1	1	25	743	767	UGCCGAUAAUUCAUGACUGUGAGCU	.:: ::::: .:::::::.::::::	GGCACACAGAUAUGAAUUGUCGGCA	Cleavage	1
Cluster_2080	UCUUGAUCUCUUUCCUUUUGGUACU	25	Medtr7g067080.1	| MYB transcription factor MYB51 | HC | chr7:24520017-24522865 | 20130731	2	-1	1	25	650	674	UCUUGAUCUCUUUCCUUUUGGUACU	: ..:.:. ::::::::::::::	UUUUUUAGAGAGAAAGAGAUCAAGA	Cleavage	1
Cluster_2080	UCUUGAUCUCUUUCCUUUUGGUACU	25	Medtr1g073890.1	| DUF3475 domain protein | HC | chr1:32821051-32818643 | 20130731	2	-1	1	25	480	504	UCUUGAUCUCUUUCCUUUUGGUACU	.:: :.::::::::::::: .::::	GGUCCUAAAAGGAAAGAGAAUAAGA	Cleavage	1
Cluster_2080	UCUUGAUCUCUUUCCUUUUGGUACU	25	Medtr1638s0010.1	| hypothetical protein | LC | scaffold1638:1333-248 | 20130731	2	-1	1	25	387	411	UCUUGAUCUCUUUCCUUUUGGUACU	:::::.:::::.::::::	CAAAGUUAAAGGGAAGAGGUCAAGA	Cleavage	1
Cluster_2080	UCUUGAUCUCUUUCCUUUUGGUACU	25	Medtr4g053440.1	| zinc finger A20 and AN1 domain stress-associated protein | HC | chr4:19378639-19377381 | 20130731	2	-1	1	25	861	885	UCUUGAUCUCUUUCCUUUUGGUACU	.: :. ..::::.:.::::::::::	GGGAUGGGAAGGGAGGAGAUCAAGA	Cleavage	1
Cluster_2080	UCUUGAUCUCUUUCCUUUUGGUACU	25	Medtr0016s0150.1	| hypothetical protein | LC | scaffold0016:196369-193192 | 20130731	2	-1	1	25	975	999	UCUUGAUCUCUUUCCUUUUGGUACU	:::::.:::::.::::::	CAAAGUUAAAGGGAAGAGGUCAAGA	Cleavage	1
Cluster_2080	UCUUGAUCUCUUUCCUUUUGGUACU	25	Medtr8g009980.1	| NADP-dependent alkenal double bond reductase | HC | chr8:2499901-2496326 | 20130731	2	-1	1	25	316	340	UCUUGAUCUCUUUCCUUUUGGUACU	:..:::::.::::::.:::	AGAUGAAGGAGGAAGGAGAUCGAGA	Cleavage	1
Cluster_210	UCACCUAAGUGAGCUUUGGCCUUGG	25	Medtr3g110430.1	| transmembrane amino acid transporter family protein | HC | chr3:51537670-51543356 | 20130731	2	-1	1	25	807	831	UCACCUAAGUGAGCUUUGGCCUUGG	:.:::: ::::::::::::.	AAGCUGUCAAAACUCACUUAGGUGG	Cleavage	1
Cluster_2113	UAAGUUCGUUGUUUACUAGCACC	23	Medtr2g098880.5	| FAR-RED impaired response-like protein | HC | chr2:42336027-42338328 | 20130731	2	-1	1	23	333	355	UAAGUUCGUUGUUUACUAGCACC	:: ::::::.:::::.::::	UUCGCGAGUAAAUAACGAGCUUA	Cleavage	1
Cluster_2113	UAAGUUCGUUGUUUACUAGCACC	23	Medtr2g098880.2	| FAR-RED impaired response-like protein | HC | chr2:42334809-42338380 | 20130731	2	-1	1	23	401	423	UAAGUUCGUUGUUUACUAGCACC	:: ::::::.:::::.::::	UUCGCGAGUAAAUAACGAGCUUA	Cleavage	1
Cluster_2113	UAAGUUCGUUGUUUACUAGCACC	23	Medtr2g098880.4	| FAR-RED impaired response-like protein | HC | chr2:42334048-42338328 | 20130731	2	-1	1	23	655	677	UAAGUUCGUUGUUUACUAGCACC	:: ::::::.:::::.::::	UUCGCGAGUAAAUAACGAGCUUA	Cleavage	1
Cluster_2113	UAAGUUCGUUGUUUACUAGCACC	23	Medtr2g098880.1	| FAR-RED impaired response-like protein | HC | chr2:42334049-42338328 | 20130731	2	-1	1	23	516	538	UAAGUUCGUUGUUUACUAGCACC	:: ::::::.:::::.::::	UUCGCGAGUAAAUAACGAGCUUA	Cleavage	1
Cluster_2113	UAAGUUCGUUGUUUACUAGCACC	23	Medtr2g098880.3	| FAR-RED impaired response-like protein | HC | chr2:42336094-42338380 | 20130731	2	-1	1	23	637	659	UAAGUUCGUUGUUUACUAGCACC	:: ::::::.:::::.::::	UUCGCGAGUAAAUAACGAGCUUA	Cleavage	1
Cluster_2122	CAUUUUGCCGGCAUUUGAGA	20	Medtr8g467650.1	| chitinase | HC | chr8:24455746-24454850 | 20130731	2	-1	1	20	65	84	CAUUUUGCCGGCAUUUGAGA	.::::::::.::::::::	GUUCAAAUGCUGGCAAAAUU	Cleavage	1
Cluster_2122	CAUUUUGCCGGCAUUUGAGA	20	Medtr3g108743.1	| PPR containing plant-like protein | HC | chr3:50227695-50227312 | 20130731	2	-1	1	20	257	276	CAUUUUGCCGGCAUUUGAGA	.:::.:::.::::::.:::	AUUCAGAUGUCGGCAAGAUG	Cleavage	1
Cluster_2124	AGGCAAAGAACAAUGAUGAAAU	22	Medtr5g040855.1	| transmembrane protein, putative | LC | chr5:17972862-17972109 | 20130731	2	-1	1	22	464	485	AGGCAAAGAACAAUGAUGAAAU	::::: :::::::::::::..:	AUUUCUUCAUUGUUCUUUGUUU	Cleavage	1
Cluster_2131	UAGCUUCUUUUAGUGGUGCGGCCU	24	Medtr8g010160.1	| ABI3-interacting protein | HC | chr8:2588108-2583935 | 20130731	2	-1	1	24	2089	2112	UAGCUUCUUUUAGUGGUGCGGCCU	: :.::::::::::::.::	UUCAAGAAUCACUAAAAGAAGUUA	Cleavage	1
Cluster_2131	UAGCUUCUUUUAGUGGUGCGGCCU	24	Medtr8g040975.1	| hypothetical protein | LC | chr8:15422135-15424182 | 20130731	2	-1	1	24	686	709	UAGCUUCUUUUAGUGGUGCGGCCU	:::: :::..:::::::::	CUGAAGCACAACUGGAAGAAGCUA	Cleavage	1
Cluster_230	UCUGAAUUUCCAACACUGGCGCC	23	Medtr1g094960.1	| auxin response factor, putative | HC | chr1:42729587-42732600 | 20130731	2	-1	1	23	696	718	UCUGAAUUUCCAACACUGGCGCC	: :::::::::::.::.:::	AUGGACAGUGUUGGAAGUUUAGA	Cleavage	1
Cluster_24	UUGAAUAAUCGUUUUACUUGGUG	23	Medtr4g131910.1	| SCF ubiquitin ligase, SKP1 component | HC | chr4:55069831-55072394 | 20130731	2	-1	1	23	381	403	UUGAAUAAUCGUUUUACUUGGUG	.::: ::::::::.:::::	CUUGGAGUUAAACGAUUGUUCAA	Cleavage	1
Cluster_257	UACAUAUUCGAAUUUCAGGAGAUG	24	Medtr1g007810.1	| glycoside hydrolase family 17 protein | HC | chr1:575699-577522 | 20130731	2	-1	1	24	1186	1209	UACAUAUUCGAAUUUCAGGAGAUG	:: ..:::::::.::::.::::	UUUCGUUUGAAAUUUGAAUGUGUA	Cleavage	1
Cluster_260	UUUUUGGAGUUGUGAGUUGGCU	22	Medtr1g106200.1	| glycosyl hydrolase family 10 protein | HC | chr1:48108098-48105317 | 20130731	2	-1	1	22	1661	1682	UUUUUGGAGUUGUGAGUUGGCU	..:::::: :::::::::::	CUUUAACUCAAAACUCCAAAAA	Cleavage	1
Cluster_260	UUUUUGGAGUUGUGAGUUGGCU	22	Medtr1g106200.2	| glycosyl hydrolase family 10 protein | HC | chr1:48108131-48105282 | 20130731	2	-1	1	22	1595	1616	UUUUUGGAGUUGUGAGUUGGCU	..:::::: :::::::::::	CUUUAACUCAAAACUCCAAAAA	Cleavage	1
Cluster_260	UUUUUGGAGUUGUGAGUUGGCU	22	Medtr3g080870.1	| oligopeptide transporter OPT family protein | HC | chr3:36608789-36602876 | 20130731	2	-1	1	22	518	539	UUUUUGGAGUUGUGAGUUGGCU	.:.:::::::...::.::::::	GGUCAACUCAUGGCUUCAAAAA	Cleavage	1
Cluster_260	UUUUUGGAGUUGUGAGUUGGCU	22	Medtr1g113730.1	| transmembrane protein, putative | LC | chr1:51313387-51311788 | 20130731	2	-1	1	22	484	505	UUUUUGGAGUUGUGAGUUGGCU	::::::..::::::::::	GAAAAACUCAUGACUCCAAAAA	Cleavage	1
Cluster_260	UUUUUGGAGUUGUGAGUUGGCU	22	Medtr7g088470.1	| alpha-L-arabinofuranosidase-like protein | HC | chr7:34462783-34468313 | 20130731	2	-1	1	22	1642	1663	UUUUUGGAGUUGUGAGUUGGCU	.::::::::::::.:::: :	UCUCAACUCACAACUUCAAACA	Cleavage	1
Cluster_260	UUUUUGGAGUUGUGAGUUGGCU	22	Medtr8g094810.1	| leguminosin group486 secreted peptide | HC | chr8:39604959-39608257 | 20130731	2	-1	1	22	1276	1297	UUUUUGGAGUUGUGAGUUGGCU	::::::.: ::::::::::	CCGCAACUCGCUACUCCAAAAA	Translation	1
Cluster_260	UUUUUGGAGUUGUGAGUUGGCU	22	Medtr7g088420.1	| alpha-L-arabinofuranosidase-like protein | HC | chr7:34435237-34441658 | 20130731	2	-1	1	22	1617	1638	UUUUUGGAGUUGUGAGUUGGCU	.::::::::::::.:::: :	UAUCAACUCACAACUUCAAACA	Cleavage	1
Cluster_261	UCAUCAUUAUCUGGGCAUG	19	Medtr1g006990.1	| subtilisin-like serine endopeptidase family protein | HC | chr1:141524-138882 | 20130731	2	-1	1	19	1103	1121	UCAUCAUUAUCUGGGCAUG	: :::.:::::.:::::::	CUUGCUCAGAUGAUGAUGA	Cleavage	1
Cluster_261	UCAUCAUUAUCUGGGCAUG	19	Medtr8g068900.1	| hypothetical protein | LC | chr8:28834057-28831258 | 20130731	2	-1	1	19	134	152	UCAUCAUUAUCUGGGCAUG	:: :..:::::::::::::	CAAGUUCAGAUAAUGAUGA	Cleavage	1
Cluster_261	UCAUCAUUAUCUGGGCAUG	19	Medtr3g103400.1	| DUF4378 domain protein | HC | chr3:47706502-47708278 | 20130731	2	-1	1	19	641	659	UCAUCAUUAUCUGGGCAUG	:::::.:::::: ::::::	CAUGCUCAGAUAUUGAUGA	Cleavage	1
Cluster_261	UCAUCAUUAUCUGGGCAUG	19	Medtr4g068670.1	| long-chain fatty acyl CoA ligase | HC | chr4:25750814-25745620 | 20130731	2	-1	1	19	832	850	UCAUCAUUAUCUGGGCAUG	.::: ::::::::::.:::	UAUGACCAGAUAAUGGUGA	Cleavage	1
Cluster_263	GAGGAUCUUUCUGUGAUGG	19	Medtr8g067280.1	| basic helix loop helix (bHLH) family transcription factor | HC | chr8:28079487-28082002 | 20130731	2	-1	1	19	592	610	GAGGAUCUUUCUGUGAUGG	.::::..::::::::.:::	UCAUCGUAGAAAGAUUCUC	Cleavage	1
Cluster_267	UUAGCUGUAUGAGAUUCUUCACC	23	Medtr2g096880.1	| PPR containing plant-like protein | HC | chr2:41406598-41409004 | 20130731	2	-1	1	23	1357	1379	UUAGCUGUAUGAGAUUCUUCACC	::::::::.::::: ::::::	UUUGAAGAAUUUCAUAAAGCUAA	Cleavage	1
Cluster_27	UUUUAUUAUCUGAACUUUGUACC	23	Medtr4g010270.2	| transmembrane protein, putative | HC | chr4:2318059-2312777 | 20130731	2	-1	1	23	407	429	UUUUAUUAUCUGAACUUUGUACC	:: :::::::.::: :::::::	GGAUCAAAGUUUAGAAAAUAAAA	Cleavage	1
Cluster_27	UUUUAUUAUCUGAACUUUGUACC	23	Medtr5g020740.1	| phenylcoumaran benzylic ether reductase-like protein Fi1 | HC | chr5:7941706-7943809 | 20130731	2	-1	1	23	1450	1472	UUUUAUUAUCUGAACUUUGUACC	.::::::::::::::.::	GAGUUAAAGUUCAGAUAAUGAAC	Cleavage	1
Cluster_27	UUUUAUUAUCUGAACUUUGUACC	23	Medtr4g010270.1	| transmembrane protein, putative | HC | chr4:2318059-2314977 | 20130731	2	-1	1	23	407	429	UUUUAUUAUCUGAACUUUGUACC	:: :::::::.::: :::::::	GGAUCAAAGUUUAGAAAAUAAAA	Cleavage	1
Cluster_28	UUUAAUGUUUGGAAUGAGGACU	22	Medtr5g023720.1	| Ulp1 protease family, carboxy-terminal domain protein | LC | chr5:9418774-9416359 | 20130731	2	-1	1	22	1013	1034	UUUAAUGUUUGGAAUGAGGACU	: .::::::.::.:::::.::	UGGUCUCAUUUCAGACAUUGAA	Cleavage	1
Cluster_28	UUUAAUGUUUGGAAUGAGGACU	22	Medtr8g469050.1	| hypothetical protein | LC | chr8:25045222-25043316 | 20130731	2	-1	1	22	795	816	UUUAAUGUUUGGAAUGAGGACU	:: :::::.::::.::::::	UCUCAUCAUUUCAAAUAUUAAA	Cleavage	1
Cluster_289	UGCUUGAUUAUAUAGGAAG	19	Medtr2g437150.1	| mTERF protein | LC | chr2:14528254-14531987 | 20130731	2	-1	1	19	1388	1406	UGCUUGAUUAUAUAGGAAG	.::::: ::::::::::::	UUUCCUCUAUAAUCAAGCA	Cleavage	1
Cluster_327	UAGGUAGAAUAGCGUCAGCGUG	22	Medtr4g088190.1	| isoflavone-7-O-methyltransferase | HC | chr4:34775358-34777697 | 20130731	2	-1	1	22	1037	1058	UAGGUAGAAUAGCGUCAGCGUG	.:::::.:::.::.:::.::	UCUGCUGAUGCUGUUUUACUUA	Cleavage	1
Cluster_327	UAGGUAGAAUAGCGUCAGCGUG	22	Medtr2g460760.1	| cytosol aminopeptidase family protein | HC | chr2:25067596-25065494 | 20130731	2	-1	1	22	590	611	UAGGUAGAAUAGCGUCAGCGUG	.:::: ::.:.:::::::::	GUUGCUGUCGUUGUUCUACCUA	Cleavage	1
Cluster_332	AGGUAGAAUUCUGUUGGUUGAA	22	Medtr3g061090.1	| BTB/POZ domain plant protein | HC | chr3:24258468-24261768 | 20130731	2	-1	1	22	93	114	AGGUAGAAUUCUGUUGGUUGAA	:::::::.:::::::::.:	ACCAACCAAUAGAAUUCUAUCA	Cleavage	1
Cluster_332	AGGUAGAAUUCUGUUGGUUGAA	22	Medtr5g025810.1	| hypothetical protein | LC | chr5:10520001-10521956 | 20130731	2	-1	1	22	350	371	AGGUAGAAUUCUGUUGGUUGAA	::::::::::::::: .:::::	UUCAACCAACAGAAUAUUACCU	Cleavage	1
Cluster_335	UAAAAAAAAAACUCUGGCCCGAAA	24	Medtr3g080530.1	| transmembrane protein, putative | HC | chr3:36437502-36438203 | 20130731	2	-1	1	24	669	692	UAAAAAAAAAACUCUGGCCCGAAA	::::: ::::::::::::	AGAAUGGCCAUAGUUUUUUUUUUU	Cleavage	1
Cluster_342	UAAACACUGCUGUCCUAGUGG	21	Medtr4g124470.1	| lysine-ketoglutarate reductase/saccharopine dehydrogenase | HC | chr4:51511890-51502928 | 20130731	2	-1	1	21	725	745	UAAACACUGCUGUCCUAGUGG	:::::::::::.:: ::::	GGACUAGGACAGCGGUAUUUA	Cleavage	1
Cluster_342	UAAACACUGCUGUCCUAGUGG	21	Medtr4g124470.4	| lysine-ketoglutarate reductase/saccharopine dehydrogenase | HC | chr4:51511890-51502928 | 20130731	2	-1	1	21	725	745	UAAACACUGCUGUCCUAGUGG	:::::::::::.:: ::::	GGACUAGGACAGCGGUAUUUA	Cleavage	1
Cluster_342	UAAACACUGCUGUCCUAGUGG	21	Medtr4g124470.3	| lysine-ketoglutarate reductase/saccharopine dehydrogenase | HC | chr4:51511890-51502928 | 20130731	2	-1	1	21	963	983	UAAACACUGCUGUCCUAGUGG	:::::::::::.:: ::::	GGACUAGGACAGCGGUAUUUA	Cleavage	1
Cluster_342	UAAACACUGCUGUCCUAGUGG	21	Medtr4g124470.2	| lysine-ketoglutarate reductase/saccharopine dehydrogenase | HC | chr4:51511890-51502928 | 20130731	2	-1	1	21	763	783	UAAACACUGCUGUCCUAGUGG	:::::::::::.:: ::::	GGACUAGGACAGCGGUAUUUA	Cleavage	1
Cluster_347	UCCUCCUCCAAAUUCUGAACU	21	Medtr3g052800.1	| hypothetical protein | LC | chr3:20909936-20910727 | 20130731	2	-1	1	21	414	434	UCCUCCUCCAAAUUCUGAACU	.: ::::..::::::::::::	GGAUCAGGGUUUGGAGGAGGA	Cleavage	1
Cluster_347	UCCUCCUCCAAAUUCUGAACU	21	Medtr3g052810.1	| hypothetical protein | HC | chr3:20912669-20913457 | 20130731	2	-1	1	21	418	438	UCCUCCUCCAAAUUCUGAACU	.: ::::..::::::::::::	GGAUCAGGGUUUGGAGGAGGA	Cleavage	1
Cluster_347	UCCUCCUCCAAAUUCUGAACU	21	Medtr3g052820.1	| hypothetical protein | HC | chr3:20920787-20921380 | 20130731	2	-1	1	21	418	438	UCCUCCUCCAAAUUCUGAACU	.: ::::..::::::::::::	GGAUCAGGGUUUGGAGGAGGA	Cleavage	1
Cluster_369	UAAACAUGAGACCAAACAUCCCCU	24	Medtr5g064480.2	| ubiquitin-protein ligase | HC | chr5:27070606-27073085 | 20130731	2	-1	1	24	1243	1266	UAAACAUGAGACCAAACAUCCCCU	:::::::::.:.::::::	GAACUAUGUUUGGUUUUAUGUUUU	Cleavage	1
Cluster_369	UAAACAUGAGACCAAACAUCCCCU	24	Medtr5g064480.1	| ubiquitin-protein ligase | HC | chr5:27070427-27073110 | 20130731	2	-1	1	24	1159	1182	UAAACAUGAGACCAAACAUCCCCU	:::::::::.:.::::::	GAACUAUGUUUGGUUUUAUGUUUU	Cleavage	1
Cluster_369	UAAACAUGAGACCAAACAUCCCCU	24	Medtr4g101970.1	| hypothetical protein | LC | chr4:42193981-42195992 | 20130731	2	-1	1	24	140	163	UAAACAUGAGACCAAACAUCCCCU	:::::::::::::::::	GUCAAUGGUUUGGUCUCAUGUUUA	Cleavage	1
Cluster_369	UAAACAUGAGACCAAACAUCCCCU	24	Medtr1g067370.1	| lung seven transmembrane receptor family protein | HC | chr1:29027853-29025870 | 20130731	2	-1	1	24	755	778	UAAACAUGAGACCAAACAUCCCCU	:.::::::::.:.::::::.	UCUAGGUGUUUGGUUUUAUGUUUG	Cleavage	1
Cluster_369	UAAACAUGAGACCAAACAUCCCCU	24	Medtr7g013660.1	| copper chaperone | HC | chr7:3949006-3946807 | 20130731	2	-1	1	24	729	752	UAAACAUGAGACCAAACAUCCCCU	: .::::::::.::.:::::.	UAUGUGUGUUUGGUUUCGUGUUUG	Cleavage	1
Cluster_4	UCACGAACAACCCGAGAUAAAAA	23	Medtr3g078627.1	| hypothetical protein | LC | chr3:35443805-35443465 | 20130731	2	-1	1	23	79	101	UCACGAACAACCCGAGAUAAAAA	: ::: ::::::::::::::::	UAUUUUCCUCGGGUUGUUCGUGA	Cleavage	1
Cluster_42	UGAUGGAGAACUUCUGCCU	19	Medtr5g021810.1	| filament-plant-like protein | HC | chr5:8494329-8500062 | 20130731	2	-1	1	19	1326	1344	UGAUGGAGAACUUCUGCCU	:::.: :::::::.:::::	AGGUACAAGUUCUUCAUCA	Cleavage	1
Cluster_42	UGAUGGAGAACUUCUGCCU	19	Medtr5g021810.2	| filament-plant-like protein | HC | chr5:8494329-8500117 | 20130731	2	-1	1	19	1467	1485	UGAUGGAGAACUUCUGCCU	:::.: :::::::.:::::	AGGUACAAGUUCUUCAUCA	Cleavage	1
Cluster_42	UGAUGGAGAACUUCUGCCU	19	Medtr5g021810.3	| filament-plant-like protein | HC | chr5:8496220-8500147 | 20130731	2	-1	1	19	1224	1242	UGAUGGAGAACUUCUGCCU	:::.: :::::::.:::::	AGGUACAAGUUCUUCAUCA	Cleavage	1
Cluster_432	AGAAUACACUUUGGCAAAUCCACC	24	Medtr7g108330.1	| CW-type zinc-finger protein | HC | chr7:44084771-44094571 | 20130731	2	-1	1	24	5623	5646	AGAAUACACUUUGGCAAAUCCACC	:::: :::::::::::::	CAUUUAUUUACCAAAGUGUAUUCC	Cleavage	1
Cluster_433	UUUUGGUAGAAUCUGGUUUACC	22	Medtr6g048310.1	| stress up-regulated Nod 19 protein | HC | chr6:17434870-17432636 | 20130731	2	-1	1	22	1093	1114	UUUUGGUAGAAUCUGGUUUACC	::::::::.::::..:::.:	CCUAAACCAGGUUCUGUCAAGA	Cleavage	1
Cluster_433	UUUUGGUAGAAUCUGGUUUACC	22	Medtr2g026080.1	| auxin-responsive family protein | HC | chr2:9414194-9411663 | 20130731	2	-1	1	22	1060	1081	UUUUGGUAGAAUCUGGUUUACC	:::.::::::::::...::	ACAAAAUCAGAUUCUACUGGAA	Cleavage	1
Cluster_433	UUUUGGUAGAAUCUGGUUUACC	22	Medtr5g038410.1	| glyoxal oxidase amine-terminal protein | HC | chr5:16845955-16847565 | 20130731	2	-1	1	22	363	384	UUUUGGUAGAAUCUGGUUUACC	.::.::::::::::::::	UUCGAAUCAGAUUCUACCAAAC	Cleavage	1
Cluster_433	UUUUGGUAGAAUCUGGUUUACC	22	Medtr4g094560.2	| stress up-regulated Nod 19 protein | HC | chr4:38240039-38236621 | 20130731	2	-1	1	22	1386	1407	UUUUGGUAGAAUCUGGUUUACC	::::::::.::::..:::.:	CCUAAACCAGGUUCUGUCAAGA	Cleavage	1
Cluster_433	UUUUGGUAGAAUCUGGUUUACC	22	Medtr4g094555.1	| stress up-regulated Nod 19 protein | HC | chr4:38227746-38225671 | 20130731	2	-1	1	22	1111	1132	UUUUGGUAGAAUCUGGUUUACC	::::::::.::::..:::.:	CCUAAACCAGGUUCUGUCAAGA	Cleavage	1
Cluster_433	UUUUGGUAGAAUCUGGUUUACC	22	Medtr4g094560.1	| stress up-regulated Nod 19 protein | HC | chr4:38240039-38236621 | 20130731	2	-1	1	22	1449	1470	UUUUGGUAGAAUCUGGUUUACC	::::::::.::::..:::.:	CCUAAACCAGGUUCUGUCAAGA	Cleavage	1
Cluster_433	UUUUGGUAGAAUCUGGUUUACC	22	Medtr6g048350.1	| stress up-regulated Nod 19 protein | HC | chr6:17456856-17453471 | 20130731	2	-1	1	22	1152	1173	UUUUGGUAGAAUCUGGUUUACC	::::::::.::::..:::.:	CCUAAACCAGGUUCUGUCAAGA	Cleavage	1
Cluster_433	UUUUGGUAGAAUCUGGUUUACC	22	Medtr4g094565.2	| stress up-regulated Nod 19 protein | HC | chr4:38249660-38247052 | 20130731	2	-1	1	22	1167	1188	UUUUGGUAGAAUCUGGUUUACC	::::::::.::::..:::.:	CCUAAACCAGGUUCUGUCAAGA	Cleavage	1
Cluster_433	UUUUGGUAGAAUCUGGUUUACC	22	Medtr4g094548.1	| stress up-regulated Nod 19 protein | HC | chr4:38215776-38212479 | 20130731	2	-1	1	22	1324	1345	UUUUGGUAGAAUCUGGUUUACC	::::::::.::::..:::.:	CCUAAACCAGGUUCUGUCAAGA	Cleavage	1
Cluster_433	UUUUGGUAGAAUCUGGUUUACC	22	Medtr4g094565.1	| stress up-regulated Nod 19 protein | HC | chr4:38249660-38247052 | 20130731	2	-1	1	22	1513	1534	UUUUGGUAGAAUCUGGUUUACC	::::::::.::::..:::.:	CCUAAACCAGGUUCUGUCAAGA	Cleavage	1
Cluster_433	UUUUGGUAGAAUCUGGUUUACC	22	Medtr4g094560.3	| stress up-regulated Nod 19 protein | HC | chr4:38239761-38236780 | 20130731	2	-1	1	22	1597	1618	UUUUGGUAGAAUCUGGUUUACC	::::::::.::::..:::.:	CCUAAACCAGGUUCUGUCAAGA	Cleavage	1
Cluster_439	UUAUUUCGUUCAAUAAACUGGA	22	Medtr4g077490.2	| ubiquitin carboxyl-terminal hydrolase | HC | chr4:29656940-29661299 | 20130731	2	-1	1	22	1480	1501	UUAUUUCGUUCAAUAAACUGGA	:..:::::::::::: ::::.:	UUUAGUUUAUUGAACCAAAUGA	Cleavage	1
Cluster_439	UUAUUUCGUUCAAUAAACUGGA	22	Medtr3g071480.1	| LRR receptor-like kinase | HC | chr3:32070026-32066014 | 20130731	2	-1	1	22	1810	1831	UUAUUUCGUUCAAUAAACUGGA	:. ::::: :::::.::::::.	UUGAGUUUCUUGAAUGAAAUAG	Cleavage	1
Cluster_477	AAAGUGAACACAAAGAACAAACU	23	Medtr5g074710.1	| peroxidase family protein | HC | chr5:31754814-31752761 | 20130731	2	-1	1	23	55	77	AAAGUGAACACAAAGAACAAACU	: : ::::.:::::: :::::::	AUUGUGUUUUUUGUGGUCACUUU	Cleavage	1
Cluster_477	AAAGUGAACACAAAGAACAAACU	23	Medtr3g037230.3	| zinc finger, C3HC4 type (RING finger) protein | HC | chr3:13635998-13627006 | 20130731	2	-1	1	23	19	41	AAAGUGAACACAAAGAACAAACU	:::::. :::::::.:::::	AAGUUGUUUCUUGUGUUUACUUU	Cleavage	1
Cluster_477	AAAGUGAACACAAAGAACAAACU	23	Medtr3g037230.2	| zinc finger, C3HC4 type (RING finger) protein | HC | chr3:13636031-13627006 | 20130731	2	-1	1	23	52	74	AAAGUGAACACAAAGAACAAACU	:::::. :::::::.:::::	AAGUUGUUUCUUGUGUUUACUUU	Cleavage	1
Cluster_485	ACGUUAGAAUUAUCGAAAGCCU	22	Medtr2g040410.1	| zinc knuckle (CCHC-type) family protein | LC | chr2:17736264-17729542 | 20130731	2	-1	1	22	2224	2245	ACGUUAGAAUUAUCGAAAGCCU	::: ::::.:::::.::::	AUUCUUCCGAUGAUUCUGACGU	Cleavage	3
Cluster_485	ACGUUAGAAUUAUCGAAAGCCU	22	Medtr2g040410.1	| zinc knuckle (CCHC-type) family protein | LC | chr2:17736264-17729542 | 20130731	2	-1	1	22	2317	2338	ACGUUAGAAUUAUCGAAAGCCU	::: ::::.:::::.::::	AUUCUUCCGAUGAUUCUGACGU	Cleavage	3
Cluster_487	ACUGGAAAGUAGUACUUGACGCCU	24	Medtr2g083920.3	| DnaJ heat shock amine-terminal domain protein | HC | chr2:35226922-35222690 | 20130731	2	-1	1	24	1034	1057	ACUGGAAAGUAGUACUUGACGCCU	::::::::::::: :.:::	CACAAUCAAGUACUACUUACUAGU	Cleavage	1
Cluster_5	UAAGAUCCUGAUCAUGUUUUCCU	23	Medtr5g053430.1	| NAC transcription factor-like protein | HC | chr5:22012794-22017536 | 20130731	2	-1	1	23	580	602	UAAGAUCCUGAUCAUGUUUUCCU	:: :::::::::::::.::.	AAAAAUACAUGAUCAGGAUUUUG	Cleavage	1
Cluster_5	UAAGAUCCUGAUCAUGUUUUCCU	23	Medtr5g053430.2	| NAC transcription factor-like protein | HC | chr5:22012794-22017536 | 20130731	2	-1	1	23	580	602	UAAGAUCCUGAUCAUGUUUUCCU	:: :::::::::::::.::.	AAAAAUACAUGAUCAGGAUUUUG	Cleavage	1
Cluster_509	AAGUUUAUGUUGGAACCACUCGAGA	25	Medtr4g032320.1	| receptor-like protein | LC | chr4:11120640-11117356 | 20130731	2	-1	1	25	1030	1054	AAGUUUAUGUUGGAACCACUCGAGA	: ::::::::::::: ::.::	GAAGGUGUGGUUCCAACAUCAAUUU	Cleavage	1
Cluster_537	ACGAGAUAACAAGUCAGAUG	20	Medtr1g030410.1	| P-loop nucleoside triphosphate hydrolase superfamily protein, putative | HC | chr1:10573825-10564912 | 20130731	2	-1	1	20	2977	2996	ACGAGAUAACAAGUCAGAUG	: ::::::::::.:.::::	AAGCUGACUUGUUGUUUCGU	Cleavage	1
Cluster_537	ACGAGAUAACAAGUCAGAUG	20	Medtr6g069200.1	| pentatricopeptide (PPR) repeat protein | HC | chr6:24897577-24898734 | 20130731	2	-1	1	20	1109	1128	ACGAGAUAACAAGUCAGAUG	:: :::.:::::::::.::	AAUAUGAUUUGUUAUCUUGU	Cleavage	1
Cluster_54	UGAACAUCUGACUUUUCGGCCGGA	24	Medtr8g037700.1	| malectin/receptor-like kinase family protein | HC | chr8:13975899-13972819 | 20130731	2	-1	1	24	2273	2296	UGAACAUCUGACUUUUCGGCCGGA	..: :::::::::: ::::::.:	AUUGACCGAAAAGUCUGAUGUUUA	Cleavage	1
Cluster_541	UGAGAGAAUCUUUGGUAAG	19	Medtr8g104740.3	| aspartyl/asparaginyl-tRNA synthetase family protein | HC | chr8:44115561-44107673 | 20130731	2	-1	1	19	659	677	UGAGAGAAUCUUUGGUAAG	: :.:::::::::::::.:	CAUGCCAAAGAUUCUCUUA	Cleavage	1
Cluster_541	UGAGAGAAUCUUUGGUAAG	19	Medtr8g104740.6	| aspartyl/asparaginyl-tRNA synthetase family protein | HC | chr8:44115561-44107673 | 20130731	2	-1	1	19	659	677	UGAGAGAAUCUUUGGUAAG	: :.:::::::::::::.:	CAUGCCAAAGAUUCUCUUA	Cleavage	1
Cluster_541	UGAGAGAAUCUUUGGUAAG	19	Medtr4g120810.1	| aspartyl/asparaginyl-tRNA synthetase family protein | HC | chr4:50017960-50010387 | 20130731	2	-1	1	19	680	698	UGAGAGAAUCUUUGGUAAG	: :.:::::::::::::.:	CAUGCCAAAGAUUCUCUUA	Cleavage	1
Cluster_541	UGAGAGAAUCUUUGGUAAG	19	Medtr8g104740.1	| aspartyl/asparaginyl-tRNA synthetase family protein | HC | chr8:44115561-44107664 | 20130731	2	-1	1	19	775	793	UGAGAGAAUCUUUGGUAAG	: :.:::::::::::::.:	CAUGCCAAAGAUUCUCUUA	Cleavage	1
Cluster_541	UGAGAGAAUCUUUGGUAAG	19	Medtr8g104740.2	| aspartyl/asparaginyl-tRNA synthetase family protein | HC | chr8:44115561-44107673 | 20130731	2	-1	1	19	659	677	UGAGAGAAUCUUUGGUAAG	: :.:::::::::::::.:	CAUGCCAAAGAUUCUCUUA	Cleavage	1
Cluster_541	UGAGAGAAUCUUUGGUAAG	19	Medtr8g104740.4	| aspartyl/asparaginyl-tRNA synthetase family protein | HC | chr8:44115561-44107664 | 20130731	2	-1	1	19	775	793	UGAGAGAAUCUUUGGUAAG	: :.:::::::::::::.:	CAUGCCAAAGAUUCUCUUA	Cleavage	1
Cluster_541	UGAGAGAAUCUUUGGUAAG	19	Medtr4g120810.2	| aspartyl/asparaginyl-tRNA synthetase family protein | HC | chr4:50017960-50012316 | 20130731	2	-1	1	19	680	698	UGAGAGAAUCUUUGGUAAG	: :.:::::::::::::.:	CAUGCCAAAGAUUCUCUUA	Cleavage	1
Cluster_541	UGAGAGAAUCUUUGGUAAG	19	Medtr4g129145.1	| hypothetical protein | LC | chr4:53763551-53762283 | 20130731	2	-1	1	19	190	208	UGAGAGAAUCUUUGGUAAG	:::.:.:::::::::.:.:	CUUGCUAAAGAUUCUUUUA	Cleavage	1
Cluster_541	UGAGAGAAUCUUUGGUAAG	19	Medtr1g076470.1	| phosphate-responsive 1 family protein | HC | chr1:34073722-34072174 | 20130731	2	-1	1	19	531	549	UGAGAGAAUCUUUGGUAAG	:: :.::::::::.:::::	CUCAUCAAAGAUUUUCUCA	Cleavage	1
Cluster_541	UGAGAGAAUCUUUGGUAAG	19	Medtr1g113700.1	| aspartyl/asparaginyl-tRNA synthetase family protein | HC | chr1:51304596-51295136 | 20130731	2	-1	1	19	558	576	UGAGAGAAUCUUUGGUAAG	: :.:::::::::::::.:	CAUGCCAAAGAUUCUCUUA	Cleavage	1
Cluster_545	UAUGAUCAUAUCAGCGUUGGCGAG	24	Medtr6g022320.1	| peptidyl serine alpha-galactosyltransferase | HC | chr6:7788998-7780243 | 20130731	2	-1	1	24	1429	1452	UAUGAUCAUAUCAGCGUUGGCGAG	:. ...:.::::::::::::::.	AUUCUUGAUGCUGAUAUGAUCAUG	Cleavage	1
Cluster_545	UAUGAUCAUAUCAGCGUUGGCGAG	24	Medtr5g079120.1	| myb-like DNA-binding domain protein | LC | chr5:33824299-33821199 | 20130731	2	-1	1	24	361	384	UAUGAUCAUAUCAGCGUUGGCGAG	: ..: :::::::::::::::	GAAGAUGAAGCUGAUAUGAUCAUA	Cleavage	1
Cluster_548	UGAUGGACUACAGAGAAAG	19	Medtr2g087590.1	| outer membrane OMP85 family protein | HC | chr2:36848781-36854045 | 20130731	2	-1	1	19	1342	1360	UGAUGGACUACAGAGAAAG	.:::::.::::::..::::	UUUUCUUUGUAGUUUAUCA	Cleavage	1
Cluster_549	UAAACUUGUUGGAGAGGGAGCU	22	Medtr1g022970.1	| peroxidase family protein | HC | chr1:7266778-7264537 | 20130731	2	-1	1	22	1504	1525	UAAACUUGUUGGAGAGGGAGCU	:: ::::.:::.:::::::	GUGUCACUCUUCAAUAAGUUUA	Cleavage	1
Cluster_549	UAAACUUGUUGGAGAGGGAGCU	22	Medtr3g035660.1	| NAD(P)H-quinone oxidoreductase subunit 2 | HC | chr3:13225940-13230352 | 20130731	2	-1	1	22	1095	1116	UAAACUUGUUGGAGAGGGAGCU	.: .::::.:::::::::::	UUUUAUCUCUUCAACAAGUUUA	Cleavage	1
Cluster_550	AGCACGACAAGAACUCAAAGCU	22	Medtr3g088835.1	| PPR containing plant-like protein | HC | chr3:40655233-40657665 | 20130731	2	-1	1	22	613	634	AGCACGACAAGAACUCAAAGCU	:. : ::::::::::::::::	UGUGUCGAGUUCUUGUCGUGCU	Cleavage	1
Cluster_551	UCAACAUUGAUCAACUUAGAACAA	24	Medtr1g073890.1	| DUF3475 domain protein | HC | chr1:32821051-32818643 | 20130731	2	-1	1	24	1202	1225	UCAACAUUGAUCAACUUAGAACAA	::::. :::::.::::::::	GGCGUCUAGCUUGAUUAAUGUUGA	Cleavage	1
Cluster_570	UUAUCAAUCAAUAAAAUGGAU	21	Medtr5g065270.1	| phosphoribosylaminoimidazole-succinocarboxamide synthase | HC | chr5:27439804-27434878 | 20130731	2	-1	1	21	984	1004	UUAUCAAUCAAUAAAAUGGAU	::: :::::.:::::::::.:	AUCAAUUUUGUUGAUUGAUGA	Cleavage	1
Cluster_570	UUAUCAAUCAAUAAAAUGGAU	21	Medtr8g056780.1	| photosystem II reaction center protein Z | HC | chr8:18972118-18972390 | 20130731	2	-1	1	21	48	68	UUAUCAAUCAAUAAAAUGGAU	:::::::::::::::::.:.	AUCCAUUUUAUUGAUUGGUGU	Cleavage	1
Cluster_574	GAAUGAAUUUGAUUGUGAAGAU	22	Medtr4g056390.1	| serine kinase-like protein | HC | chr4:20643675-20638632 | 20130731	2	-1	1	22	83	104	GAAUGAAUUUGAUUGUGAAGAU	:.::: ::::::.:::::::.	CUUUUCUCAAUCAGAUUCAUUU	Cleavage	1
Cluster_574	GAAUGAAUUUGAUUGUGAAGAU	22	Medtr7g022810.3	| DUF4378 domain protein | HC | chr7:7382687-7387714 | 20130731	2	-1	1	22	344	365	GAAUGAAUUUGAUUGUGAAGAU	.::.:.:::::::::.:::.	GCUUUUAUAAUCAAAUUUAUUU	Cleavage	1
Cluster_574	GAAUGAAUUUGAUUGUGAAGAU	22	Medtr1g106210.2	| cyclin-like protein, putative | HC | chr1:48114624-48117670 | 20130731	2	-1	1	22	136	157	GAAUGAAUUUGAUUGUGAAGAU	::::. ::::.::::::::	CAAUUCAUCAUCAGAUUCAUUC	Cleavage	1
Cluster_574	GAAUGAAUUUGAUUGUGAAGAU	22	Medtr1g106210.1	| cyclin-like protein, putative | HC | chr1:48114624-48117933 | 20130731	2	-1	1	22	136	157	GAAUGAAUUUGAUUGUGAAGAU	::::. ::::.::::::::	CAAUUCAUCAUCAGAUUCAUUC	Cleavage	1
Cluster_574	GAAUGAAUUUGAUUGUGAAGAU	22	Medtr3g063070.1	| TRAM, LAG1 and CLN8 (TLC) lipid-sensing domain protein | HC | chr3:28547655-28542831 | 20130731	2	-1	1	22	1142	1163	GAAUGAAUUUGAUUGUGAAGAU	::.::::..::.:::::.::::	AUUUUCAUGAUUAAAUUUAUUC	Cleavage	1
Cluster_574	GAAUGAAUUUGAUUGUGAAGAU	22	Medtr3g063070.2	| TRAM, LAG1 and CLN8 (TLC) lipid-sensing domain protein | HC | chr3:28547875-28542849 | 20130731	2	-1	1	22	1072	1093	GAAUGAAUUUGAUUGUGAAGAU	::.::::..::.:::::.::::	AUUUUCAUGAUUAAAUUUAUUC	Cleavage	1
Cluster_595	UGUAGUUUGGUCAGCUUGGCACAG	24	Medtr3g049530.1	| F-box/FBD/LRR protein | LC | chr3:18462648-18465581 | 20130731	2	-1	1	24	327	350	UGUAGUUUGGUCAGCUUGGCACAG	:::::.:::.:::..::::	UGAAACCAAGUUGAUCAAGUUACA	Cleavage	1
Cluster_596	UCCGCGGCAUUAUUAUCUG	19	Medtr3g045460.1	| Myb/SANT-like DNA-binding domain protein | HC | chr3:14798812-14790393 | 20130731	2	-1	1	19	1760	1778	UCCGCGGCAUUAUUAUCUG	:::::.::::::..:.:::	CAGAUGAUAAUGUUGUGGA	Cleavage	1
Cluster_596	UCCGCGGCAUUAUUAUCUG	19	Medtr3g045460.2	| Myb/SANT-like DNA-binding domain protein | HC | chr3:14798812-14790314 | 20130731	2	-1	1	19	1760	1778	UCCGCGGCAUUAUUAUCUG	:::::.::::::..:.:::	CAGAUGAUAAUGUUGUGGA	Cleavage	1
Cluster_597	UUUUCUUUCUGACUGUAAUAGU	22	Medtr1g086840.2	| D27 family protein, putative | HC | chr1:38882140-38884357 | 20130731	2	-1	1	22	71	92	UUUUCUUUCUGACUGUAAUAGU	..:.:::::::.:::::::::	GUUGUUACAGUUAGAAAGAAAU	Cleavage	1
Cluster_597	UUUUCUUUCUGACUGUAAUAGU	22	Medtr8g064890.1	| F-box protein interaction domain protein | LC | chr8:27231261-27230092 | 20130731	2	-1	1	22	994	1015	UUUUCUUUCUGACUGUAAUAGU	:.::::.:::::.:.::::::.	AUUAUUGCAGUCGGGAAGAAAG	Cleavage	1
Cluster_597	UUUUCUUUCUGACUGUAAUAGU	22	Medtr4g087040.1	| kinesin motor domain protein | HC | chr4:34094918-34080260 | 20130731	2	-1	1	22	8578	8599	UUUUCUUUCUGACUGUAAUAGU	:: :::::::::: :::::::.	ACCAUUACAGUCAAAAAGAAAG	Cleavage	1
Cluster_597	UUUUCUUUCUGACUGUAAUAGU	22	Medtr4g099190.2	| plant/K14A3-4 protein | HC | chr4:41098251-41093510 | 20130731	2	-1	1	22	3028	3049	UUUUCUUUCUGACUGUAAUAGU	.:::.:::.:::::::::.	GUGGUUAUAGUUAGAAAGAAAG	Cleavage	1
Cluster_597	UUUUCUUUCUGACUGUAAUAGU	22	Medtr1g086840.1	| D27 family protein, putative | HC | chr1:38882140-38884971 | 20130731	2	-1	1	22	71	92	UUUUCUUUCUGACUGUAAUAGU	..:.:::::::.:::::::::	GUUGUUACAGUUAGAAAGAAAU	Cleavage	1
Cluster_597	UUUUCUUUCUGACUGUAAUAGU	22	Medtr2g104190.1	| frigida-LIKE protein | LC | chr2:44896943-44894953 | 20130731	2	-1	1	22	927	948	UUUUCUUUCUGACUGUAAUAGU	.::::::::.:::::.::.	AAAGUUACAGUCGGAAAGGAAG	Cleavage	1
Cluster_598	UAAUUGGAUUCUUGAAUCGCCU	22	Medtr8g040730.1	| sulfotransferase | HC | chr8:15172205-15168737 | 20130731	2	-1	1	22	338	359	UAAUUGGAUUCUUGAAUCGCCU	:: : ::::::::.:::::::.	AGUCAAUUCAAGAGUCCAAUUG	Cleavage	2
Cluster_598	UAAUUGGAUUCUUGAAUCGCCU	22	Medtr8g040490.1	| sulfotransferase | LC | chr8:15066311-15067933 | 20130731	2	-1	1	22	485	506	UAAUUGGAUUCUUGAAUCGCCU	:: : ::::::::.:::::::.	AGUCAAUUCAAGAGUCCAAUUG	Cleavage	1
Cluster_598	UAAUUGGAUUCUUGAAUCGCCU	22	Medtr4g069800.2	| ATP-dependent Clp protease proteolytic protein | HC | chr4:26245605-26250350 | 20130731	2	-1	1	22	951	972	UAAUUGGAUUCUUGAAUCGCCU	.::::.:::::::.:.:::	UUUUGAUUUAAGAAUCUAGUUA	Cleavage	1
Cluster_598	UAAUUGGAUUCUUGAAUCGCCU	22	Medtr4g069800.1	| ATP-dependent Clp protease proteolytic protein | HC | chr4:26245523-26250401 | 20130731	2	-1	1	22	1129	1150	UAAUUGGAUUCUUGAAUCGCCU	.::::.:::::::.:.:::	UUUUGAUUUAAGAAUCUAGUUA	Cleavage	1
Cluster_607	UAGCUUCUUUUAGUGGUGCGGCCU	24	Medtr8g040975.1	| hypothetical protein | LC | chr8:15422135-15424182 | 20130731	2	-1	1	24	686	709	UAGCUUCUUUUAGUGGUGCGGCCU	:::: :::..:::::::::	CUGAAGCACAACUGGAAGAAGCUA	Cleavage	1
Cluster_607	UAGCUUCUUUUAGUGGUGCGGCCU	24	Medtr8g010160.1	| ABI3-interacting protein | HC | chr8:2588108-2583935 | 20130731	2	-1	1	24	2089	2112	UAGCUUCUUUUAGUGGUGCGGCCU	: :.::::::::::::.::	UUCAAGAAUCACUAAAAGAAGUUA	Cleavage	1
Cluster_626	UGAUAACCCUUGGAUUGAAAUUGCC	25	Medtr3g462760.1	| laccase/diphenol oxidase family protein | HC | chr3:25090888-25094154 | 20130731	2	-1	1	25	136	160	UGAUAACCCUUGGAUUGAAAUUGCC	.: ::::: :.:::::::.:::	GUAGAAUUCAAACUAAGGGUUGUCA	Cleavage	1
Cluster_627	UACAUAGUCCAGGACCAACAUAACC	25	Medtr3g116210.1	| hypothetical protein | LC | chr3:54333346-54332573 | 20130731	2	-1	1	25	289	313	UACAUAGUCCAGGACCAACAUAACC	: :::::::..:::.::.::::	AACUUUGUUGGUUUUGGGCUGUGUA	Cleavage	1
Cluster_629	UUUUUUCUUGGAAGAGCUAGCCG	23	Medtr4g014600.1	| hypothetical protein | HC | chr4:4150139-4144138 | 20130731	2	-1	1	23	4	26	UUUUUUCUUGGAAGAGCUAGCCG	:.:. :::::.::::::::::	AAGUUGACUCUUUCAAGAAAAAA	Cleavage	1
Cluster_629	UUUUUUCUUGGAAGAGCUAGCCG	23	Medtr4g013235.2	| SCAR2, putative | HC | chr4:3624743-3632836 | 20130731	2	-1	1	23	1699	1721	UUUUUUCUUGGAAGAGCUAGCCG	:::.::::::::::::.:	UAAAUAGUUCUUCCAAGAAAGAU	Cleavage	1
Cluster_629	UUUUUUCUUGGAAGAGCUAGCCG	23	Medtr4g013235.3	| SCAR2, putative | HC | chr4:3624743-3632913 | 20130731	2	-1	1	23	1699	1721	UUUUUUCUUGGAAGAGCUAGCCG	:::.::::::::::::.:	UAAAUAGUUCUUCCAAGAAAGAU	Cleavage	1
Cluster_629	UUUUUUCUUGGAAGAGCUAGCCG	23	Medtr4g014600.2	| hypothetical protein | HC | chr4:4150139-4144138 | 20130731	2	-1	1	23	4	26	UUUUUUCUUGGAAGAGCUAGCCG	:.:. :::::.::::::::::	AAGUUGACUCUUUCAAGAAAAAA	Cleavage	1
Cluster_629	UUUUUUCUUGGAAGAGCUAGCCG	23	Medtr1g022960.1	| nucleotide-binding; protein-binding protein | HC | chr1:7263616-7257247 | 20130731	2	-1	1	23	1526	1548	UUUUUUCUUGGAAGAGCUAGCCG	:::.::::::.::..::::	GGAGUAGUUCUUCCGAGGGAAAA	Cleavage	1
Cluster_629	UUUUUUCUUGGAAGAGCUAGCCG	23	Medtr4g013235.1	| SCAR2, putative | HC | chr4:3624744-3632964 | 20130731	2	-1	1	23	1701	1723	UUUUUUCUUGGAAGAGCUAGCCG	:::.::::::::::::.:	UAAAUAGUUCUUCCAAGAAAGAU	Cleavage	1
Cluster_629	UUUUUUCUUGGAAGAGCUAGCCG	23	Medtr1g022960.2	| nucleotide-binding; protein-binding protein | HC | chr1:7263623-7257247 | 20130731	2	-1	1	23	1282	1304	UUUUUUCUUGGAAGAGCUAGCCG	:::.::::::.::..::::	GGAGUAGUUCUUCCGAGGGAAAA	Cleavage	1
Cluster_629	UUUUUUCUUGGAAGAGCUAGCCG	23	Medtr1g055055.1	| F-box protein interaction domain protein | LC | chr1:24234318-24233264 | 20130731	2	-1	1	23	472	494	UUUUUUCUUGGAAGAGCUAGCCG	.::: ::::::::::.::.:	UCUUUAGAUCUUCCAAGAGAAGA	Cleavage	1
Cluster_629	UUUUUUCUUGGAAGAGCUAGCCG	23	Medtr4g106370.1	| glycosyl hydrolase family 47 protein | HC | chr4:44116468-44111121 | 20130731	2	-1	1	23	280	302	UUUUUUCUUGGAAGAGCUAGCCG	: : :::::::::::::::	CCCAUUGGUCUUCCAAGAAAAAA	Cleavage	1
Cluster_63	UCAGCAUUGUCUCAGACUAUUGUU	24	Medtr4g043650.1	| glycerol-3-phosphate dehydrogenase | HC | chr4:14625115-14621396 | 20130731	2	-1	1	24	783	806	UCAGCAUUGUCUCAGACUAUUGUU	::::: ::.:::::::.:::	CUUUAUAGUGUGGGACAAUGUUGA	Cleavage	1
Cluster_63	UCAGCAUUGUCUCAGACUAUUGUU	24	Medtr7g017700.1	| PPR containing plant-like protein | HC | chr7:5672185-5669078 | 20130731	2	-1	1	24	2709	2732	UCAGCAUUGUCUCAGACUAUUGUU	.:::: :::::.::::.:::	CUGUGUAGUGUGAGAUAAUGUUGA	Cleavage	1
Cluster_635	UAAAGAAGUUGUACUCUGCCU	21	Medtr5g077430.1	| LRR receptor-like kinase | HC | chr5:33054258-33058084 | 20130731	2	-1	1	21	938	958	UAAAGAAGUUGUACUCUGCCU	::::: ::..:::::::::	UUGCAGAAUAUGACUUCUUUA	Cleavage	1
Cluster_637	ACGAAGAUUGCAAAGGCUGCCU	22	Medtr3g466710.1	| NB-ARC domain disease resistance protein | LC | chr3:27437100-27433318 | 20130731	2	-1	1	22	3162	3183	ACGAAGAUUGCAAAGGCUGCCU	:::.::::::::::::: :	UAUCAGUCUUUGCAAUCUUCCU	Cleavage	1
Cluster_64	UGGCAUCUUGAGAACUUUUAGCA	23	Medtr4g052940.1	| RNA recognition motif, a.k.a. RRM, RBD protein | HC | chr4:19205591-19210680 | 20130731	2	-1	1	23	262	284	UGGCAUCUUGAGAACUUUUAGCA	: :::. ::::.:::::::::	AUCCAAAGUUUCUUAAGAUGCCA	Cleavage	1
Cluster_64	UGGCAUCUUGAGAACUUUUAGCA	23	Medtr1g029070.1	| nuclear transcription factor Y protein | LC | chr1:9919895-9921620 | 20130731	2	-1	1	23	219	241	UGGCAUCUUGAGAACUUUUAGCA	:: :::: :::::::::::::	CGCAAAAAUAUCUCAAGAUGCCA	Cleavage	1
Cluster_645	UUCAAUCUAAUUCUGAAUAGGGU	23	Medtr1g051825.3	| structural maintenance of chromosomes protein | HC | chr1:20727036-20747784 | 20130731	2	-1	1	23	2362	2384	UUCAAUCUAAUUCUGAAUAGGGU	:.:::::::: ::::::::	AAGAUGUUCAGAAUCAGAUUGAA	Cleavage	1
Cluster_645	UUCAAUCUAAUUCUGAAUAGGGU	23	Medtr1g051825.2	| structural maintenance of chromosomes protein | HC | chr1:20727128-20747784 | 20130731	2	-1	1	23	2508	2530	UUCAAUCUAAUUCUGAAUAGGGU	:.:::::::: ::::::::	AAGAUGUUCAGAAUCAGAUUGAA	Cleavage	1
Cluster_645	UUCAAUCUAAUUCUGAAUAGGGU	23	Medtr1g051825.1	| structural maintenance of chromosomes protein | HC | chr1:20727826-20747759 | 20130731	2	-1	1	23	2324	2346	UUCAAUCUAAUUCUGAAUAGGGU	:.:::::::: ::::::::	AAGAUGUUCAGAAUCAGAUUGAA	Cleavage	1
Cluster_65	UAAUUAGUUUUGAUUUGAUGCCU	23	Medtr3g096310.2	| GDP-mannose transporter GONST1 | HC | chr3:44013420-44018709 | 20130731	2	-1	1	23	1491	1513	UAAUUAGUUUUGAUUUGAUGCCU	::::.:::::::::.:::	CCAACUCAAGUCAAAACUAGUUA	Cleavage	1
Cluster_65	UAAUUAGUUUUGAUUUGAUGCCU	23	Medtr4g009960.3	| eukaryotic translation initiation factor 3 subunit | HC | chr4:2156546-2144712 | 20130731	2	-1	1	23	3680	3702	UAAUUAGUUUUGAUUUGAUGCCU	: :. :::::::::::::::::	AAGUUUCAAAUCAAAACUAAUUC	Cleavage	1
Cluster_656	AUUUGAAGAAAGAACUUGCAAUGCC	25	Medtr4g093590.1	| executer 1 | HC | chr4:37133162-37118168 | 20130731	2	-1	1	25	2274	2298	AUUUGAAGAAAGAACUUGCAAUGCC	:::.:: :::::::::::.::	AGACUUGUAAAUUCUUUCUUCAGAU	Cleavage	1
Cluster_656	AUUUGAAGAAAGAACUUGCAAUGCC	25	Medtr0052s0020.1	| hypothetical protein | HC | scaffold0052:3749-2706 | 20130731	2	-1	1	25	953	977	AUUUGAAGAAAGAACUUGCAAUGCC	:: :::: ::.:::.:::::::	AAAAUCGCAACUUUUUUUUUCAAAU	Cleavage	1
Cluster_656	AUUUGAAGAAAGAACUUGCAAUGCC	25	Medtr4g093590.2	| executer 1 | HC | chr4:37133116-37121655 | 20130731	2	-1	1	25	2228	2252	AUUUGAAGAAAGAACUUGCAAUGCC	:::.:: :::::::::::.::	AGACUUGUAAAUUCUUUCUUCAGAU	Cleavage	1
Cluster_656	AUUUGAAGAAAGAACUUGCAAUGCC	25	Medtr3g114110.3	| hypothetical protein | LC | chr3:53284633-53288572 | 20130731	2	-1	1	25	1041	1065	AUUUGAAGAAAGAACUUGCAAUGCC	:::::::.::::: :::::	ACCCAGGCAAGUUUUUUCUGCAAAU	Cleavage	1
Cluster_656	AUUUGAAGAAAGAACUUGCAAUGCC	25	Medtr6g069510.1	| auxin efflux carrier family transporter | HC | chr6:25038233-25043852 | 20130731	2	-1	1	25	943	967	AUUUGAAGAAAGAACUUGCAAUGCC	:: :::: :::::::::::::	AAGAUCACAAGGUCUUUCUUCAAAU	Cleavage	1
Cluster_692	UUCAAAAAACAACGGAUUGU	20	Medtr3g028010.1	| zinc finger A20 and AN1 domain stress-associated protein | HC | chr3:8849690-8848559 | 20130731	2	-1	1	20	1073	1092	UUCAAAAAACAACGGAUUGU	:.:::..::::::::::::.	AUAAUUUGUUGUUUUUUGAG	Cleavage	1
Cluster_694	UCUCCGGAUCGUUUGUACACGAAGC	25	Medtr7g098150.1	| peptide transporter | HC | chr7:39218359-39215366 | 20130731	2	-1	1	25	1198	1221	UCUCCGGAUCGUUUGUACACGAAGC	::::. :::.: ::.::::::::::	GCUUU-UGUGCCAAUGAUCCGGAGA	Cleavage	1
Cluster_71	CAAAGAAACUGUCAGUCUGAUA	22	Medtr1g041435.2	| RNA polymerase II-associated-like protein | HC | chr1:15514644-15508773 | 20130731	2	-1	1	22	800	821	CAAAGAAACUGUCAGUCUGAUA	:::: :::..:::::::::	GCACAGAAUGAUGGUUUCUUUG	Cleavage	1
Cluster_71	CAAAGAAACUGUCAGUCUGAUA	22	Medtr1g041435.1	| RNA polymerase II-associated-like protein | HC | chr1:15516239-15508773 | 20130731	2	-1	1	22	953	974	CAAAGAAACUGUCAGUCUGAUA	:::: :::..:::::::::	GCACAGAAUGAUGGUUUCUUUG	Cleavage	1
Cluster_717	CUGAAGAGAUAAAUGAUGAAU	21	Medtr4g125980.1	| membrane-bound O-acyltransferase family MBOAT protein | HC | chr4:52331808-52341209 | 20130731	2	-1	1	21	335	355	CUGAAGAGAUAAAUGAUGAAU	:.::.::::::.:::::.:	UAUUAUUAUUUAUUUCUUCGG	Cleavage	1
Cluster_717	CUGAAGAGAUAAAUGAUGAAU	21	Medtr4g125980.3	| membrane-bound O-acyltransferase family MBOAT protein | HC | chr4:52331808-52341209 | 20130731	2	-1	1	21	335	355	CUGAAGAGAUAAAUGAUGAAU	:.::.::::::.:::::.:	UAUUAUUAUUUAUUUCUUCGG	Cleavage	1
Cluster_717	CUGAAGAGAUAAAUGAUGAAU	21	Medtr4g125980.2	| membrane-bound O-acyltransferase family MBOAT protein | HC | chr4:52331808-52341209 | 20130731	2	-1	1	21	335	355	CUGAAGAGAUAAAUGAUGAAU	:.::.::::::.:::::.:	UAUUAUUAUUUAUUUCUUCGG	Cleavage	1
Cluster_717	CUGAAGAGAUAAAUGAUGAAU	21	Medtr1g018840.2	| papain family cysteine protease | HC | chr1:5550773-5546467 | 20130731	2	-1	1	21	1423	1443	CUGAAGAGAUAAAUGAUGAAU	: :.:: ::::::::.:::::	AAUUAUAAUUUAUCUUUUCAG	Cleavage	1
Cluster_717	CUGAAGAGAUAAAUGAUGAAU	21	Medtr4g085090.1	| phosphatidylinositol-4-phosphate 5-kinase family protein | HC | chr4:33270620-33278335 | 20130731	2	-1	1	21	2801	2821	CUGAAGAGAUAAAUGAUGAAU	:.:::::::::::::: ::	GCUUAUCAUUUAUCUCUUGAG	Cleavage	1
Cluster_717	CUGAAGAGAUAAAUGAUGAAU	21	Medtr5g027840.1	| DEAD-box ATP-dependent RNA helicase | HC | chr5:11616617-11610718 | 20130731	2	-1	1	21	1801	1821	CUGAAGAGAUAAAUGAUGAAU	::::.::::::.::::::	UCUCAUUAUUUAUUUCUUCAA	Cleavage	1
Cluster_721	UAUGAUUUAUAAUGAGGAUGAAG	23	Medtr0028s0240.1	| hypothetical protein | LC | scaffold0028:98321-95874 | 20130731	2	-1	1	23	1488	1510	UAUGAUUUAUAAUGAGGAUGAAG	:::.:::::: ::::::::	CAAAAUCUUCAUUAAAAAUCAUA	Cleavage	1
Cluster_727	AGAUUUUGAUCUUUAAAAGGCCU	23	Medtr3g466480.1	| CBL-interacting kinase | HC | chr3:27312840-27311509 | 20130731	2	-1	1	23	655	677	AGAUUUUGAUCUUUAAAAGGCCU	:::::::: :::::::::.:	CUUCCUUUUAAUGAUCAAAAUUU	Cleavage	1
Cluster_727	AGAUUUUGAUCUUUAAAAGGCCU	23	Medtr3g118525.1	| N-acetylglucosaminyltransferase I | HC | chr3:55465373-55466602 | 20130731	2	-1	1	23	669	691	AGAUUUUGAUCUUUAAAAGGCCU	.::: ::.::::::::::.:	GUAUCUUGUAGAGAUCAAAAUUU	Cleavage	2
Cluster_727	AGAUUUUGAUCUUUAAAAGGCCU	23	Medtr3g104640.1	| DUF3511 domain protein | HC | chr3:48217696-48215815 | 20130731	2	-1	1	23	218	240	AGAUUUUGAUCUUUAAAAGGCCU	: : .::: :.::::::::::::	AAGAUUUUCAGAGAUCAAAAUCU	Cleavage	1
Cluster_727	AGAUUUUGAUCUUUAAAAGGCCU	23	Medtr1g100110.1	| malectin/receptor-like kinase family protein | HC | chr1:45100036-45097546 | 20130731	2	-1	1	23	367	389	AGAUUUUGAUCUUUAAAAGGCCU	:: :::::::::::::.:.:	UUUCCAUUUAAAGAUCAAAGUUU	Cleavage	1
Cluster_727	AGAUUUUGAUCUUUAAAAGGCCU	23	Medtr4g088525.1	| serpin-like protein | LC | chr4:35153843-35155935 | 20130731	2	-1	1	23	880	902	AGAUUUUGAUCUUUAAAAGGCCU	.:: ::.:::.:::::::::	GACUCUCUUGAAGGUCAAAAUCU	Cleavage	1
Cluster_733	UCACUUGAACAUGAGCGAG	19	Medtr2g103750.1	| transmembrane protein, putative | HC | chr2:44667526-44668852 | 20130731	2	-1	1	19	1045	1063	UCACUUGAACAUGAGCGAG	::.:. :::::::::::::	CUUGUCCAUGUUCAAGUGA	Cleavage	1
Cluster_733	UCACUUGAACAUGAGCGAG	19	Medtr3g034210.1	| F-box/WD-40 repeat plant protein | HC | chr3:11046354-11053719 | 20130731	2	-1	1	19	896	914	UCACUUGAACAUGAGCGAG	::.:.:.:::::.::::::	CUUGUUUAUGUUUAAGUGA	Cleavage	1
Cluster_749	GAAGAAUUAAAUGUUGGAAAAUG	23	Medtr7g075370.1	| hypothetical protein | LC | chr7:28233386-28232316 | 20130731	2	-1	1	23	1003	1025	GAAGAAUUAAAUGUUGGAAAAUG	:::::: :::::.:::.:::	CUAUUUCCAUCAUUUGAUUUUUC	Cleavage	1
Cluster_751	UGUGUCUUAAAGAAAUCAUGCCU	23	Medtr4g055190.1	| hypothetical protein | HC | chr4:20072654-20075166 | 20130731	2	-1	1	23	139	161	UGUGUCUUAAAGAAAUCAUGCCU	:::::::::::..:::::	UCAAAUGAUUUCUUUGGGACACC	Cleavage	1
Cluster_754	UGGUGAAGGCGGAAUUGUCAAAGC	24	Medtr4g100900.1	| 40S ribosomal S30-like protein | HC | chr4:41654963-41655855 | 20130731	2	-1	1	24	131	154	UGGUGAAGGCGGAAUUGUCAAAGC	: :::::: :.::.::::::::	AAUCUGACAAAUUCGUCUUCACCA	Cleavage	1
Cluster_766	ACGACCGAGAACUUUUUCUGAU	22	Medtr5g065670.1	| transcription factor | HC | chr5:27629590-27627190 | 20130731	2	-1	1	22	539	560	ACGACCGAGAACUUUUUCUGAU	::::::: ::::.:.::::::	CUCAGAAACAGUUUUUGGUCGU	Cleavage	1
Cluster_804	UCUUUAGAUGAUCUUGGUG	19	Medtr4g053310.1	| transmembrane protein, putative | LC | chr4:19250295-19249802 | 20130731	2	-1	1	19	371	389	UCUUUAGAUGAUCUUGGUG	.: :::::::::::::.::	UAACAAGAUCAUCUAAGGA	Cleavage	1
Cluster_805	UUGCUUAACACUAUUACCAGCCU	23	Medtr1058s0010.1	| transposable element protein, putative | LC | scaffold1058:2231-511 | 20130731	2	-1	1	23	605	627	UUGCUUAACACUAUUACCAGCCU	:::: ::::.:::::.:::::	GUGCUGCUAAUGGUGUUGAGCAA	Cleavage	1
Cluster_810	AAUGUUUAGACUUAGUGAAGCCU	23	Medtr5g022600.3	| Rho-like GTP-binding protein | HC | chr5:8913558-8916499 | 20130731	2	-1	1	23	927	949	AAUGUUUAGACUUAGUGAAGCCU	:::::::.:: ::::::::	GUAAUUCACUAGGUGUAAACAUU	Cleavage	1
Cluster_810	AAUGUUUAGACUUAGUGAAGCCU	23	Medtr4g088030.1	| trichome birefringence-like protein | HC | chr4:34505532-34508462 | 20130731	2	-1	1	23	341	363	AAUGUUUAGACUUAGUGAAGCCU	: ::::.:.:::::::::::	GUGAUUCAUUGAGUCUAAACAUG	Cleavage	1
Cluster_810	AAUGUUUAGACUUAGUGAAGCCU	23	Medtr5g022600.2	| Rho-like GTP-binding protein | HC | chr5:8913564-8916486 | 20130731	2	-1	1	23	809	831	AAUGUUUAGACUUAGUGAAGCCU	:::::::.:: ::::::::	GUAAUUCACUAGGUGUAAACAUU	Cleavage	1
Cluster_810	AAUGUUUAGACUUAGUGAAGCCU	23	Medtr4g087730.1	| Pmr5/Cas1p GDSL/SGNH-like acyl-esterase family protein | HC | chr4:34515354-34520486 | 20130731	2	-1	1	23	353	375	AAUGUUUAGACUUAGUGAAGCCU	: ::::.:.:::::::::::	GUGAUUCAUUGAGUCUAAACAUG	Cleavage	1
Cluster_810	AAUGUUUAGACUUAGUGAAGCCU	23	Medtr2g015720.1	| trichome birefringence-like protein | HC | chr2:4691237-4685635 | 20130731	2	-1	1	23	679	701	AAUGUUUAGACUUAGUGAAGCCU	: ::::::.:::::.:::::	GUGAUUCACUGAGUCUGAACAUG	Cleavage	1
Cluster_810	AAUGUUUAGACUUAGUGAAGCCU	23	Medtr4g087730.2	| Pmr5/Cas1p GDSL/SGNH-like acyl-esterase family protein | HC | chr4:34515354-34524162 | 20130731	2	-1	1	23	353	375	AAUGUUUAGACUUAGUGAAGCCU	: ::::.:.:::::::::::	GUGAUUCAUUGAGUCUAAACAUG	Cleavage	1
Cluster_810	AAUGUUUAGACUUAGUGAAGCCU	23	Medtr5g022600.1	| Rho-like GTP-binding protein | HC | chr5:8913558-8916499 | 20130731	2	-1	1	23	861	883	AAUGUUUAGACUUAGUGAAGCCU	:::::::.:: ::::::::	GUAAUUCACUAGGUGUAAACAUU	Cleavage	1
Cluster_819	UUCUUUGGCCUUUCCCUUG	19	Medtr5g086700.1	| ubiquitin carboxyl-terminal hydrolase-like protein | HC | chr5:37479517-37457082 | 20130731	2	-1	1	19	1789	1807	UUCUUUGGCCUUUCCCUUG	.::::::.:::..::::::	UAAGGGAGAGGUUAAAGAA	Cleavage	1
Cluster_819	UUCUUUGGCCUUUCCCUUG	19	Medtr5g086700.2	| ubiquitin carboxyl-terminal hydrolase-like protein | HC | chr5:37479368-37457121 | 20130731	2	-1	1	19	1640	1658	UUCUUUGGCCUUUCCCUUG	.::::::.:::..::::::	UAAGGGAGAGGUUAAAGAA	Cleavage	1
Cluster_819	UUCUUUGGCCUUUCCCUUG	19	Medtr1g080390.1	| RNA-binding (RRM/RBD/RNP motif) family protein | HC | chr1:35718041-35708690 | 20130731	2	-1	1	19	2812	2830	UUCUUUGGCCUUUCCCUUG	: ::: :::::::::::::	CUAGGAAAAGGCCAAAGAA	Cleavage	1
Cluster_824	UAAAGACUGUCCAAAAUCUGCCCA	24	Medtr8g106150.2	| cytokinin receptor histidine kinase | HC | chr8:44824480-44817990 | 20130731	2	-1	1	24	1304	1327	UAAAGACUGUCCAAAAUCUGCCCA	::.::::::..:::::::.	GAAAGAGGUUUUGGGUAGUCUUUG	Cleavage	1
Cluster_824	UAAAGACUGUCCAAAAUCUGCCCA	24	Medtr8g106150.1	| cytokinin receptor histidine kinase | HC | chr8:44824500-44817990 | 20130731	2	-1	1	24	827	850	UAAAGACUGUCCAAAAUCUGCCCA	::.::::::..:::::::.	GAAAGAGGUUUUGGGUAGUCUUUG	Cleavage	1
Cluster_824	UAAAGACUGUCCAAAAUCUGCCCA	24	Medtr8g106150.4	| cytokinin receptor histidine kinase | HC | chr8:44823842-44817990 | 20130731	2	-1	1	24	834	857	UAAAGACUGUCCAAAAUCUGCCCA	::.::::::..:::::::.	GAAAGAGGUUUUGGGUAGUCUUUG	Cleavage	1
Cluster_826	UCGGAGCGUCUUUCCAUGGCACAG	24	Medtr6g017015.1	| disease resistance protein (NBS-LRR class) family protein | LC | chr6:6684067-6682313 | 20130731	2	-1	1	24	773	796	UCGGAGCGUCUUUCCAUGGCACAG	:::: :::::::::::.:.	UGAAACCAUUGAAAGACGCUCUGG	Cleavage	1
Cluster_827	ACGAGCAACUUCUCUUUCCUUCG	23	Medtr5g007380.2	| insulinase (peptidase family M16) | HC | chr5:1336812-1323954 | 20130731	2	-1	1	23	1464	1486	ACGAGCAACUUCUCUUUCCUUCG	::::::::: ::::::.::::	AUAAGGAAAGACAAGUUGUUCGU	Cleavage	1
Cluster_827	ACGAGCAACUUCUCUUUCCUUCG	23	Medtr5g007380.1	| insulinase (peptidase family M16) | HC | chr5:1336812-1323954 | 20130731	2	-1	1	23	1464	1486	ACGAGCAACUUCUCUUUCCUUCG	::::::::: ::::::.::::	AUAAGGAAAGACAAGUUGUUCGU	Cleavage	1
Cluster_83	UUGGGAUUGCAAAUUUGAUGACAUC	25	Medtr1g113820.1	| ankyrin repeat protein | HC | chr1:51345033-51341687 | 20130731	2	-1	1	25	1816	1840	UUGGGAUUGCAAAUUUGAUGACAUC	: :: ::..::::::.::::.:::	UAAGUGAUUGAAUUUGUAAUCUCAA	Cleavage	1
Cluster_832	UUUUCUUCAUCUUCCUCCUCG	21	Medtr1g025810.1	| F-box-like protein | LC | chr1:8297751-8297017 | 20130731	2	-1	1	21	336	356	UUUUCUUCAUCUUCCUCCUCG	::::::::::: ::::::.:	AGAGGAGGAAGAAGAAGAAGA	Cleavage	3
Cluster_832	UUUUCUUCAUCUUCCUCCUCG	21	Medtr1g025810.1	| F-box-like protein | LC | chr1:8297751-8297017 | 20130731	2	-1	1	21	378	398	UUUUCUUCAUCUUCCUCCUCG	::::::::::: ::::::.:	AGAGGAGGAAGAAGAAGAAGA	Cleavage	3
Cluster_832	UUUUCUUCAUCUUCCUCCUCG	21	Medtr1g025810.1	| F-box-like protein | LC | chr1:8297751-8297017 | 20130731	2	-1	1	21	297	317	UUUUCUUCAUCUUCCUCCUCG	.:: :::::.:::::::::.:	UGAAGAGGAGGAUGAAGAAGA	Cleavage	3
Cluster_832	UUUUCUUCAUCUUCCUCCUCG	21	Medtr3g111740.1	| hypothetical protein | HC | chr3:52274077-52269700 | 20130731	2	-1	1	21	1516	1536	UUUUCUUCAUCUUCCUCCUCG	.:: :::::::::::.::::.	UGACGAGGAAGAUGAGGAAAG	Cleavage	1
Cluster_832	UUUUCUUCAUCUUCCUCCUCG	21	Medtr3g111740.2	| hypothetical protein | HC | chr3:52274077-52270989 | 20130731	2	-1	1	21	1516	1536	UUUUCUUCAUCUUCCUCCUCG	.:: :::::::::::.::::.	UGACGAGGAAGAUGAGGAAAG	Cleavage	1
Cluster_832	UUUUCUUCAUCUUCCUCCUCG	21	Medtr8g092425.1	| hypothetical protein | HC | chr8:38642462-38638212 | 20130731	2	-1	1	21	180	200	UUUUCUUCAUCUUCCUCCUCG	::::::::::: ::::::.:	AGAGGAGGAAGAAGAAGAAGA	Cleavage	2
Cluster_832	UUUUCUUCAUCUUCCUCCUCG	21	Medtr8g092425.1	| hypothetical protein | HC | chr8:38642462-38638212 | 20130731	2	-1	1	21	224	244	UUUUCUUCAUCUUCCUCCUCG	::::::::::: ::::::.:	GGAGGAGGAAGAAGAAGAAGA	Cleavage	2
Cluster_832	UUUUCUUCAUCUUCCUCCUCG	21	Medtr7g085600.1	| chaperone DnaJ domain protein | HC | chr7:33181901-33186268 | 20130731	2	-1	1	21	580	600	UUUUCUUCAUCUUCCUCCUCG	.::: ::::.:::::::.:::	UGAGAAGGAGGAUGAAGGAAA	Cleavage	1
Cluster_832	UUUUCUUCAUCUUCCUCCUCG	21	Medtr7g076690.1	| hypothetical protein | HC | chr7:28903843-28901286 | 20130731	2	-1	1	21	605	625	UUUUCUUCAUCUUCCUCCUCG	.:: :::::::::::.:::.:	UGAAGAGGAAGAUGAGGAAGA	Cleavage	1
Cluster_832	UUUUCUUCAUCUUCCUCCUCG	21	Medtr8g088370.1	| import component Toc86/159, G and M domain protein | HC | chr8:36605419-36610672 | 20130731	2	-1	1	21	3468	3488	UUUUCUUCAUCUUCCUCCUCG	:.::: :::::::::::.::	GGGGGAAGAAGAUGAAGAGAA	Cleavage	2
Cluster_832	UUUUCUUCAUCUUCCUCCUCG	21	Medtr4g122270.1	| DNA replication licensing factor MCM2, putative | HC | chr4:50492382-50486664 | 20130731	2	-1	1	21	243	263	UUUUCUUCAUCUUCCUCCUCG	:: ::::::::::.::::.:	GGAAGAGGAAGAUGGAGAAGA	Cleavage	1
Cluster_832	UUUUCUUCAUCUUCCUCCUCG	21	Medtr4g056480.1	| vacuolar protein sorting protein | HC | chr4:20713510-20696458 | 20130731	2	-1	1	21	163	183	UUUUCUUCAUCUUCCUCCUCG	:: ::::::::::::::..:	AGACGAGGAAGAUGAAGAGGA	Cleavage	1
Cluster_832	UUUUCUUCAUCUUCCUCCUCG	21	Medtr4g056480.2	| vacuolar protein sorting protein | HC | chr4:20713510-20696605 | 20130731	2	-1	1	21	163	183	UUUUCUUCAUCUUCCUCCUCG	:: ::::::::::::::..:	AGACGAGGAAGAUGAAGAGGA	Cleavage	1
Cluster_832	UUUUCUUCAUCUUCCUCCUCG	21	Medtr7g069930.1	| hypothetical protein | HC | chr7:25781437-25782731 | 20130731	2	-1	1	21	400	420	UUUUCUUCAUCUUCCUCCUCG	::: :::::::::::::::	GGAGAAGGAAGAUGAAGAAAU	Cleavage	1
Cluster_832	UUUUCUUCAUCUUCCUCCUCG	21	Medtr1g116900.2	| Nse4, component of Smc5/6 DNA repair complex protein | HC | chr1:52801866-52798334 | 20130731	2	-1	1	21	422	442	UUUUCUUCAUCUUCCUCCUCG	:::::: :.:::::::::.:	GGAGGAGAAGGAUGAAGAAGA	Cleavage	1
Cluster_832	UUUUCUUCAUCUUCCUCCUCG	21	Medtr1g116900.1	| Nse4, component of Smc5/6 DNA repair complex protein | HC | chr1:52801926-52798628 | 20130731	2	-1	1	21	482	502	UUUUCUUCAUCUUCCUCCUCG	:::::: :.:::::::::.:	GGAGGAGAAGGAUGAAGAAGA	Cleavage	1
Cluster_832	UUUUCUUCAUCUUCCUCCUCG	21	Medtr8g095330.1	| sucrose non-fermenting-like kinase 2 family protein | HC | chr8:39884287-39881032 | 20130731	2	-1	1	21	1569	1589	UUUUCUUCAUCUUCCUCCUCG	:: :::::.:::::::::.:	GGAAGAGGAGGAUGAAGAAGA	Cleavage	1
Cluster_832	UUUUCUUCAUCUUCCUCCUCG	21	Medtr5g070100.1	| RNA recognition motif (RRM) containing protein | HC | chr5:29707444-29702897 | 20130731	2	-1	1	21	579	599	UUUUCUUCAUCUUCCUCCUCG	:: ::::::::::::::..:	GGAAGAGGAAGAUGAAGAGGA	Cleavage	1
Cluster_832	UUUUCUUCAUCUUCCUCCUCG	21	Medtr0554s0020.1	| cytochrome P450 family 71 protein | HC | scaffold0554:4993-7144 | 20130731	2	-1	1	21	795	815	UUUUCUUCAUCUUCCUCCUCG	::::: ::::.:::::::.:	AGAGGAUGAAGGUGAAGAAGA	Cleavage	1
Cluster_832	UUUUCUUCAUCUUCCUCCUCG	21	Medtr1g418545.1	| acyl-CoA-binding domain protein | HC | chr1:5360731-5364929 | 20130731	2	-1	1	21	780	800	UUUUCUUCAUCUUCCUCCUCG	::: ::::::::::.::.::	GGAGAAGGAAGAUGAGGAGAA	Cleavage	1
Cluster_832	UUUUCUUCAUCUUCCUCCUCG	21	Medtr1g015185.2	| PHD finger alfin-like protein | HC | chr1:3751249-3746646 | 20130731	2	-1	1	21	845	865	UUUUCUUCAUCUUCCUCCUCG	:: :::::::::::.:::.:	GGACGAGGAAGAUGAGGAAGA	Cleavage	1
Cluster_832	UUUUCUUCAUCUUCCUCCUCG	21	Medtr1g015185.1	| PHD finger alfin-like protein | HC | chr1:3751255-3746618 | 20130731	2	-1	1	21	816	836	UUUUCUUCAUCUUCCUCCUCG	:: :::::::::::.:::.:	GGACGAGGAAGAUGAGGAAGA	Cleavage	1
Cluster_832	UUUUCUUCAUCUUCCUCCUCG	21	Medtr4g122830.1	| hypothetical protein | LC | chr4:50658562-50660740 | 20130731	2	-1	1	21	516	536	UUUUCUUCAUCUUCCUCCUCG	::::: ::::::::::::..	GGAGGAUGAAGAUGAAGAAGG	Cleavage	1
Cluster_832	UUUUCUUCAUCUUCCUCCUCG	21	Medtr2g096080.1	| CCT motif protein | HC | chr2:41011109-41013371 | 20130731	2	-1	1	21	740	760	UUUUCUUCAUCUUCCUCCUCG	::::: ::.:::::::::.:	GGAGGAAGAGGAUGAAGAAGA	Cleavage	1
Cluster_832	UUUUCUUCAUCUUCCUCCUCG	21	Medtr8g467390.1	| DUF1666 family protein | LC | chr8:24215397-24217284 | 20130731	2	-1	1	21	273	293	UUUUCUUCAUCUUCCUCCUCG	:: ::::::::::.:::::.	AGAAGAGGAAGAUGGAGAAAG	Cleavage	1
Cluster_832	UUUUCUUCAUCUUCCUCCUCG	21	Medtr2g012310.1	| Pre-mRNA-splicing factor SYF1-like protein | HC | chr2:3026039-3032585 | 20130731	2	-1	1	21	1200	1220	UUUUCUUCAUCUUCCUCCUCG	.:: :: ::::::::::::::	UGACGAAGAAGAUGAAGAAAA	Cleavage	1
Cluster_832	UUUUCUUCAUCUUCCUCCUCG	21	Medtr4g117530.1	| galactose oxidase | LC | chr4:48735876-48734767 | 20130731	2	-1	1	21	186	206	UUUUCUUCAUCUUCCUCCUCG	:: :::::::::::::::..	GGAAGAGGAAGAUGAAGAAGG	Cleavage	1
Cluster_832	UUUUCUUCAUCUUCCUCCUCG	21	Medtr2g005820.1	| bromodomain protein | HC | chr2:325936-330633 | 20130731	2	-1	1	21	1623	1643	UUUUCUUCAUCUUCCUCCUCG	::::::::::::::.:::...	CGAGGAGGAAGAUGGAGAGGG	Cleavage	1
Cluster_832	UUUUCUUCAUCUUCCUCCUCG	21	Medtr3g466820.1	| insulin-degrading enzyme | HC | chr3:27516028-27503943 | 20130731	2	-1	1	21	418	438	UUUUCUUCAUCUUCCUCCUCG	.:::::::: :::::::::.:	UGAGGAGGAUGAUGAAGAAGA	Cleavage	2
Cluster_832	UUUUCUUCAUCUUCCUCCUCG	21	Medtr4g094795.1	| zinc finger, C3HC4 type (RING finger) protein | HC | chr4:39016144-39012687 | 20130731	2	-1	1	21	1752	1772	UUUUCUUCAUCUUCCUCCUCG	::: :::::::::::::::..	CGACGAGGAAGAUGAAGAAGG	Cleavage	1
Cluster_832	UUUUCUUCAUCUUCCUCCUCG	21	Medtr2g025620.1	| transcription initiation factor IIF subunit alpha | HC | chr2:9168202-9161990 | 20130731	2	-1	1	21	951	971	UUUUCUUCAUCUUCCUCCUCG	.::::::::.:::::::: ::	UGAGGAGGAGGAUGAAGAUAA	Cleavage	1
Cluster_832	UUUUCUUCAUCUUCCUCCUCG	21	Medtr4g091110.1	| C3HC4-type RING zinc finger protein | LC | chr4:36070700-36067211 | 20130731	2	-1	1	21	561	581	UUUUCUUCAUCUUCCUCCUCG	.::::::::::: ::::::.:	UGAGGAGGAAGAAGAAGAAGA	Cleavage	1
Cluster_832	UUUUCUUCAUCUUCCUCCUCG	21	Medtr7g101270.1	| hypothetical protein | LC | chr7:40866721-40865807 | 20130731	2	-1	1	21	44	64	UUUUCUUCAUCUUCCUCCUCG	.:::::::::::::: ::::.	UGAGGAGGAAGAUGAUGAAAG	Cleavage	1
Cluster_832	UUUUCUUCAUCUUCCUCCUCG	21	Medtr1g107565.2	| heavy metal-associated domain protein | HC | chr1:48896065-48893528 | 20130731	2	-1	1	21	693	713	UUUUCUUCAUCUUCCUCCUCG	::::::::.::::::::.:	AGAGGAGGAGGAUGAAGAGAU	Cleavage	1
Cluster_832	UUUUCUUCAUCUUCCUCCUCG	21	Medtr1g107565.1	| heavy metal-associated domain protein | HC | chr1:48895819-48893576 | 20130731	2	-1	1	21	566	586	UUUUCUUCAUCUUCCUCCUCG	::::::::.::::::::.:	AGAGGAGGAGGAUGAAGAGAU	Cleavage	1
Cluster_832	UUUUCUUCAUCUUCCUCCUCG	21	Medtr5g093560.15	| SWAP (suppressor-of-white-APricot)/surp domain protein, putative | HC | chr5:40848020-40854378 | 20130731	2	-1	1	21	5003	5023	UUUUCUUCAUCUUCCUCCUCG	:::::::: :::::::::.:	AGAGGAGGAUGAUGAAGAAGA	Cleavage	1
Cluster_832	UUUUCUUCAUCUUCCUCCUCG	21	Medtr5g093560.18	| SWAP (suppressor-of-white-APricot)/surp domain protein, putative | HC | chr5:40848020-40854378 | 20130731	2	-1	1	21	4916	4936	UUUUCUUCAUCUUCCUCCUCG	:::::::: :::::::::.:	AGAGGAGGAUGAUGAAGAAGA	Cleavage	1
Cluster_832	UUUUCUUCAUCUUCCUCCUCG	21	Medtr5g093560.11	| SWAP (suppressor-of-white-APricot)/surp domain protein, putative | HC | chr5:40848020-40854378 | 20130731	2	-1	1	21	4863	4883	UUUUCUUCAUCUUCCUCCUCG	:::::::: :::::::::.:	AGAGGAGGAUGAUGAAGAAGA	Cleavage	1
Cluster_832	UUUUCUUCAUCUUCCUCCUCG	21	Medtr5g093560.13	| SWAP (suppressor-of-white-APricot)/surp domain protein, putative | HC | chr5:40848021-40854378 | 20130731	2	-1	1	21	4858	4878	UUUUCUUCAUCUUCCUCCUCG	:::::::: :::::::::.:	AGAGGAGGAUGAUGAAGAAGA	Cleavage	1
Cluster_832	UUUUCUUCAUCUUCCUCCUCG	21	Medtr5g093560.17	| SWAP (suppressor-of-white-APricot)/surp domain protein, putative | HC | chr5:40848020-40854378 | 20130731	2	-1	1	21	4776	4796	UUUUCUUCAUCUUCCUCCUCG	:::::::: :::::::::.:	AGAGGAGGAUGAUGAAGAAGA	Cleavage	1
Cluster_832	UUUUCUUCAUCUUCCUCCUCG	21	Medtr5g093560.5	| SWAP (suppressor-of-white-APricot)/surp domain protein, putative | HC | chr5:40848021-40854378 | 20130731	2	-1	1	21	4718	4738	UUUUCUUCAUCUUCCUCCUCG	:::::::: :::::::::.:	AGAGGAGGAUGAUGAAGAAGA	Cleavage	1
Cluster_832	UUUUCUUCAUCUUCCUCCUCG	21	Medtr5g093560.14	| SWAP (suppressor-of-white-APricot)/surp domain protein, putative | HC | chr5:40848020-40854378 | 20130731	2	-1	1	21	4692	4712	UUUUCUUCAUCUUCCUCCUCG	:::::::: :::::::::.:	AGAGGAGGAUGAUGAAGAAGA	Cleavage	1
Cluster_832	UUUUCUUCAUCUUCCUCCUCG	21	Medtr5g093560.10	| SWAP (suppressor-of-white-APricot)/surp domain protein, putative | HC | chr5:40848020-40854378 | 20130731	2	-1	1	21	4605	4625	UUUUCUUCAUCUUCCUCCUCG	:::::::: :::::::::.:	AGAGGAGGAUGAUGAAGAAGA	Cleavage	1
Cluster_832	UUUUCUUCAUCUUCCUCCUCG	21	Medtr5g093560.6	| SWAP (suppressor-of-white-APricot)/surp domain protein, putative | HC | chr5:40848020-40854378 | 20130731	2	-1	1	21	4552	4572	UUUUCUUCAUCUUCCUCCUCG	:::::::: :::::::::.:	AGAGGAGGAUGAUGAAGAAGA	Cleavage	1
Cluster_832	UUUUCUUCAUCUUCCUCCUCG	21	Medtr5g093560.9	| SWAP (suppressor-of-white-APricot)/surp domain protein, putative | HC | chr5:40848024-40854378 | 20130731	2	-1	1	21	4544	4564	UUUUCUUCAUCUUCCUCCUCG	:::::::: :::::::::.:	AGAGGAGGAUGAUGAAGAAGA	Cleavage	1
Cluster_832	UUUUCUUCAUCUUCCUCCUCG	21	Medtr5g093560.19	| SWAP (suppressor-of-white-APricot)/surp domain protein, putative | HC | chr5:40848020-40854378 | 20130731	2	-1	1	21	4513	4533	UUUUCUUCAUCUUCCUCCUCG	:::::::: :::::::::.:	AGAGGAGGAUGAUGAAGAAGA	Cleavage	1
Cluster_832	UUUUCUUCAUCUUCCUCCUCG	21	Medtr5g093560.4	| SWAP (suppressor-of-white-APricot)/surp domain protein, putative | HC | chr5:40848020-40854378 | 20130731	2	-1	1	21	4373	4393	UUUUCUUCAUCUUCCUCCUCG	:::::::: :::::::::.:	AGAGGAGGAUGAUGAAGAAGA	Cleavage	1
Cluster_832	UUUUCUUCAUCUUCCUCCUCG	21	Medtr4g134620.1	| cullin-associated NEDD8-dissociated protein | HC | chr4:56405401-56416838 | 20130731	2	-1	1	21	1173	1193	UUUUCUUCAUCUUCCUCCUCG	:::::::: ::::::::::.	AGAGGAGGAUGAUGAAGAAAG	Cleavage	1
Cluster_832	UUUUCUUCAUCUUCCUCCUCG	21	Medtr4g134620.2	| cullin-associated NEDD8-dissociated protein | HC | chr4:56405427-56416838 | 20130731	2	-1	1	21	1147	1167	UUUUCUUCAUCUUCCUCCUCG	:::::::: ::::::::::.	AGAGGAGGAUGAUGAAGAAAG	Cleavage	1
Cluster_832	UUUUCUUCAUCUUCCUCCUCG	21	Medtr7g450780.1	| SNF2 family amine-terminal protein | LC | chr7:16969460-16964457 | 20130731	2	-1	1	21	732	752	UUUUCUUCAUCUUCCUCCUCG	::::::::::: :::::.::	GGAGGAGGAAGAAGAAGAGAA	Cleavage	1
Cluster_832	UUUUCUUCAUCUUCCUCCUCG	21	Medtr1g116957.1	| importin-like protein | HC | chr1:52882908-52894678 | 20130731	2	-1	1	21	2802	2822	UUUUCUUCAUCUUCCUCCUCG	::::::::.:: ::::::::	AGAGGAGGAGGAAGAAGAAAA	Cleavage	1
Cluster_832	UUUUCUUCAUCUUCCUCCUCG	21	Medtr5g079680.1	| hypothetical protein | HC | chr5:34077575-34073115 | 20130731	2	-1	1	21	844	864	UUUUCUUCAUCUUCCUCCUCG	::::::::::.::.::.:.:	GGAGGAGGAAGGUGGAGGAGA	Cleavage	1
Cluster_832	UUUUCUUCAUCUUCCUCCUCG	21	Medtr5g093560.2	| SWAP (suppressor-of-white-APricot)/surp domain protein, putative | HC | chr5:40848020-40854378 | 20130731	2	-1	1	21	2704	2724	UUUUCUUCAUCUUCCUCCUCG	:::::::: :::::::::.:	AGAGGAGGAUGAUGAAGAAGA	Cleavage	1
Cluster_832	UUUUCUUCAUCUUCCUCCUCG	21	Medtr5g093560.12	| SWAP (suppressor-of-white-APricot)/surp domain protein, putative | HC | chr5:40848020-40854378 | 20130731	2	-1	1	21	2663	2683	UUUUCUUCAUCUUCCUCCUCG	:::::::: :::::::::.:	AGAGGAGGAUGAUGAAGAAGA	Cleavage	1
Cluster_832	UUUUCUUCAUCUUCCUCCUCG	21	Medtr5g093560.16	| SWAP (suppressor-of-white-APricot)/surp domain protein, putative | HC | chr5:40848020-40854378 | 20130731	2	-1	1	21	2576	2596	UUUUCUUCAUCUUCCUCCUCG	:::::::: :::::::::.:	AGAGGAGGAUGAUGAAGAAGA	Cleavage	1
Cluster_832	UUUUCUUCAUCUUCCUCCUCG	21	Medtr5g093560.8	| SWAP (suppressor-of-white-APricot)/surp domain protein, putative | HC | chr5:40848020-40854378 | 20130731	2	-1	1	21	2519	2539	UUUUCUUCAUCUUCCUCCUCG	:::::::: :::::::::.:	AGAGGAGGAUGAUGAAGAAGA	Cleavage	1
Cluster_832	UUUUCUUCAUCUUCCUCCUCG	21	Medtr5g093560.1	| SWAP (suppressor-of-white-APricot)/surp domain protein, putative | HC | chr5:40848020-40854592 | 20130731	2	-1	1	21	2173	2193	UUUUCUUCAUCUUCCUCCUCG	:::::::: :::::::::.:	AGAGGAGGAUGAUGAAGAAGA	Cleavage	1
Cluster_832	UUUUCUUCAUCUUCCUCCUCG	21	Medtr5g093560.7	| SWAP (suppressor-of-white-APricot)/surp domain protein, putative | HC | chr5:40848020-40854378 | 20130731	2	-1	1	21	2352	2372	UUUUCUUCAUCUUCCUCCUCG	:::::::: :::::::::.:	AGAGGAGGAUGAUGAAGAAGA	Cleavage	1
Cluster_832	UUUUCUUCAUCUUCCUCCUCG	21	Medtr5g093560.3	| SWAP (suppressor-of-white-APricot)/surp domain protein, putative | HC | chr5:40848020-40854378 | 20130731	2	-1	1	21	2214	2234	UUUUCUUCAUCUUCCUCCUCG	:::::::: :::::::::.:	AGAGGAGGAUGAUGAAGAAGA	Cleavage	1
Cluster_832	UUUUCUUCAUCUUCCUCCUCG	21	Medtr7g081705.1	| BZIP transcription factor bZIP80 | HC | chr7:31344981-31338733 | 20130731	2	-1	1	21	1249	1269	UUUUCUUCAUCUUCCUCCUCG	::::::::::: ::::::.:	AGAGGAGGAAGAAGAAGAAGA	Cleavage	1
Cluster_832	UUUUCUUCAUCUUCCUCCUCG	21	Medtr2g014260.1	| zinc finger C-x8-C-x5-C-x3-H type protein | HC | chr2:4005657-3999321 | 20130731	2	-1	1	21	306	326	UUUUCUUCAUCUUCCUCCUCG	::::::::::: ::::::.:	GGAGGAGGAAGAAGAAGAAGA	Cleavage	2
Cluster_832	UUUUCUUCAUCUUCCUCCUCG	21	Medtr2g014260.1	| zinc finger C-x8-C-x5-C-x3-H type protein | HC | chr2:4005657-3999321 | 20130731	2	-1	1	21	432	452	UUUUCUUCAUCUUCCUCCUCG	::::::::::: ::::::.:	GGAGGAGGAAGAAGAAGAAGA	Cleavage	2
Cluster_832	UUUUCUUCAUCUUCCUCCUCG	21	Medtr2g014260.3	| zinc finger C-x8-C-x5-C-x3-H type protein | HC | chr2:4005657-3999321 | 20130731	2	-1	1	21	306	326	UUUUCUUCAUCUUCCUCCUCG	::::::::::: ::::::.:	GGAGGAGGAAGAAGAAGAAGA	Cleavage	2
Cluster_832	UUUUCUUCAUCUUCCUCCUCG	21	Medtr2g014260.3	| zinc finger C-x8-C-x5-C-x3-H type protein | HC | chr2:4005657-3999321 | 20130731	2	-1	1	21	432	452	UUUUCUUCAUCUUCCUCCUCG	::::::::::: ::::::.:	GGAGGAGGAAGAAGAAGAAGA	Cleavage	2
Cluster_832	UUUUCUUCAUCUUCCUCCUCG	21	Medtr2g014260.4	| zinc finger C-x8-C-x5-C-x3-H type protein | HC | chr2:4005657-3999321 | 20130731	2	-1	1	21	306	326	UUUUCUUCAUCUUCCUCCUCG	::::::::::: ::::::.:	GGAGGAGGAAGAAGAAGAAGA	Cleavage	2
Cluster_832	UUUUCUUCAUCUUCCUCCUCG	21	Medtr2g014260.4	| zinc finger C-x8-C-x5-C-x3-H type protein | HC | chr2:4005657-3999321 | 20130731	2	-1	1	21	432	452	UUUUCUUCAUCUUCCUCCUCG	::::::::::: ::::::.:	GGAGGAGGAAGAAGAAGAAGA	Cleavage	2
Cluster_832	UUUUCUUCAUCUUCCUCCUCG	21	Medtr2g014260.2	| zinc finger C-x8-C-x5-C-x3-H type protein | HC | chr2:4005657-3999321 | 20130731	2	-1	1	21	306	326	UUUUCUUCAUCUUCCUCCUCG	::::::::::: ::::::.:	GGAGGAGGAAGAAGAAGAAGA	Cleavage	2
Cluster_832	UUUUCUUCAUCUUCCUCCUCG	21	Medtr2g014260.2	| zinc finger C-x8-C-x5-C-x3-H type protein | HC | chr2:4005657-3999321 | 20130731	2	-1	1	21	432	452	UUUUCUUCAUCUUCCUCCUCG	::::::::::: ::::::.:	GGAGGAGGAAGAAGAAGAAGA	Cleavage	2
Cluster_832	UUUUCUUCAUCUUCCUCCUCG	21	Medtr5g079680.2	| hypothetical protein | HC | chr5:34077594-34074842 | 20130731	2	-1	1	21	863	883	UUUUCUUCAUCUUCCUCCUCG	::::::::::.::.::.:.:	GGAGGAGGAAGGUGGAGGAGA	Cleavage	1
Cluster_832	UUUUCUUCAUCUUCCUCCUCG	21	Medtr7g010360.1	| RNA recognition motif, a.k.a. RRM, RBD protein | LC | chr7:2533493-2542856 | 20130731	2	-1	1	21	956	976	UUUUCUUCAUCUUCCUCCUCG	::::::::::: ::::::.:	GGAGGAGGAAGAGGAAGAAGA	Cleavage	1
Cluster_832	UUUUCUUCAUCUUCCUCCUCG	21	Medtr2g025590.1	| transcription initiation factor IIF subunit alpha | HC | chr2:9156803-9148860 | 20130731	2	-1	1	21	1224	1244	UUUUCUUCAUCUUCCUCCUCG	::::::::.:::::::: ::	GGAGGAGGAGGAUGAAGAUAA	Cleavage	1
Cluster_832	UUUUCUUCAUCUUCCUCCUCG	21	Medtr4g089085.1	| splicing factor 3B subunit 2 | HC | chr4:35697993-35706063 | 20130731	2	-1	1	21	1377	1397	UUUUCUUCAUCUUCCUCCUCG	::::::::::: ::::::.:	AGAGGAGGAAGAGGAAGAAGA	Cleavage	2
Cluster_832	UUUUCUUCAUCUUCCUCCUCG	21	Medtr5g028030.1	| transcription elongation factor (TFIIS) family protein | HC | chr5:11713865-11718779 | 20130731	2	-1	1	21	412	432	UUUUCUUCAUCUUCCUCCUCG	::::::::.:::::::..:.	GGAGGAGGAGGAUGAAGGGAG	Cleavage	1
Cluster_832	UUUUCUUCAUCUUCCUCCUCG	21	Medtr5g064850.1	| apoptosis antagonizing transcription factor | HC | chr5:27248469-27256882 | 20130731	2	-1	1	21	314	334	UUUUCUUCAUCUUCCUCCUCG	::::::::::: ::::::.:	GGAGGAGGAAGAGGAAGAAGA	Cleavage	1
Cluster_832	UUUUCUUCAUCUUCCUCCUCG	21	Medtr5g064850.2	| apoptosis antagonizing transcription factor | HC | chr5:27248469-27256851 | 20130731	2	-1	1	21	314	334	UUUUCUUCAUCUUCCUCCUCG	::::::::::: ::::::.:	GGAGGAGGAAGAGGAAGAAGA	Cleavage	1
Cluster_832	UUUUCUUCAUCUUCCUCCUCG	21	Medtr7g053520.1	| 50S ribosomal protein L7/L12 | HC | chr7:18863632-18861167 | 20130731	2	-1	1	21	379	399	UUUUCUUCAUCUUCCUCCUCG	::::::::::::: ::::.:	GGAGGAGGAAGAUGUAGAAGA	Cleavage	1
Cluster_832	UUUUCUUCAUCUUCCUCCUCG	21	Medtr3g100650.1	| homeobox domain, ZF-HD class protein | HC | chr3:46301626-46300635 | 20130731	2	-1	1	21	199	219	UUUUCUUCAUCUUCCUCCUCG	::::::::::: ::::::.:	GGAGGAGGAAGAAGAAGAAGA	Cleavage	1
Cluster_832	UUUUCUUCAUCUUCCUCCUCG	21	Medtr5g090740.1	| AAA domain protein | HC | chr5:39503827-39504673 | 20130731	2	-1	1	21	423	443	UUUUCUUCAUCUUCCUCCUCG	::::::::.:.::.::.:::	GGAGGAGGAGGGUGGAGGAAA	Cleavage	1
Cluster_832	UUUUCUUCAUCUUCCUCCUCG	21	Medtr1g100240.1	| P-loop nucleoside triphosphate hydrolase superfamily protein | HC | chr1:45178862-45175352 | 20130731	2	-1	1	21	1141	1161	UUUUCUUCAUCUUCCUCCUCG	::::::.:::::.:::::	UUAGGAGGGAGAUGGAGAAAU	Cleavage	2
Cluster_832	UUUUCUUCAUCUUCCUCCUCG	21	Medtr7g117585.1	| B3 DNA-binding domain protein | LC | chr7:48759457-48760428 | 20130731	2	-1	1	21	93	113	UUUUCUUCAUCUUCCUCCUCG	::::: ::::::::.:::.:	GGAGGAAGAAGAUGAGGAAGA	Cleavage	1
Cluster_832	UUUUCUUCAUCUUCCUCCUCG	21	Medtr5g063760.1	| receptor-like protein | HC | chr5:26452142-26450331 | 20130731	2	-1	1	21	1757	1777	UUUUCUUCAUCUUCCUCCUCG	:::::::::::::::..:	UACGGAGGAAGAUGAAGAGGA	Cleavage	1
Cluster_832	UUUUCUUCAUCUUCCUCCUCG	21	Medtr3g100150.1	| HXXXD-type acyl-transferase family protein | HC | chr3:46009166-46012505 | 20130731	2	-1	1	21	1082	1102	UUUUCUUCAUCUUCCUCCUCG	::::::::.:::::.:::	GAUGGAGGAAGGUGAAGGAAA	Cleavage	1
Cluster_854	CUAGAAGCUAGAUCAGAAUGACU	23	Medtr8g080080.2	| ankyrin repeat protein | HC | chr8:34396488-34399946 | 20130731	2	-1	1	23	2499	2521	CUAGAAGCUAGAUCAGAAUGACU	.:: .::::.::::::::::	ACAUAUAUUGAUUUAGCUUCUAG	Cleavage	1
Cluster_854	CUAGAAGCUAGAUCAGAAUGACU	23	Medtr8g080080.1	| ankyrin repeat protein | HC | chr8:34396523-34399946 | 20130731	2	-1	1	23	2635	2657	CUAGAAGCUAGAUCAGAAUGACU	.:: .::::.::::::::::	ACAUAUAUUGAUUUAGCUUCUAG	Cleavage	1
Cluster_856	CUUGGCAUUGCAGUAUCUUAGAAC	24	Medtr8g076020.2	| calcium-dependent kinase CPK1 adapter protein, putative | HC | chr8:32154562-32158215 | 20130731	2	-1	1	24	190	213	CUUGGCAUUGCAGUAUCUUAGAAC	::::::.:::::::.:..:	GGGUGAAGAUAUUGCAAUGUCGGG	Cleavage	1
Cluster_856	CUUGGCAUUGCAGUAUCUUAGAAC	24	Medtr8g076020.1	| calcium-dependent kinase CPK1 adapter protein, putative | HC | chr8:32154717-32158096 | 20130731	2	-1	1	24	321	344	CUUGGCAUUGCAGUAUCUUAGAAC	::::::.:::::::.:..:	GGGUGAAGAUAUUGCAAUGUCGGG	Cleavage	1
Cluster_856	CUUGGCAUUGCAGUAUCUUAGAAC	24	Medtr8g076020.3	| calcium-dependent kinase CPK1 adapter protein, putative | HC | chr8:32154747-32158096 | 20130731	2	-1	1	24	584	607	CUUGGCAUUGCAGUAUCUUAGAAC	::::::.:::::::.:..:	GGGUGAAGAUAUUGCAAUGUCGGG	Cleavage	1
Cluster_856	CUUGGCAUUGCAGUAUCUUAGAAC	24	Medtr4g071070.1	| vacuolar proton ATPase a3-like protein | HC | chr4:26777805-26767130 | 20130731	2	-1	1	24	1868	1891	CUUGGCAUUGCAGUAUCUUAGAAC	:.:: ::.::::::::::::	AUAAUGAGCUAUUGCAAUGCCAAG	Cleavage	1
Cluster_857	UUCUUGCUGUAGCACCUGAAG	21	Medtr8g023050.1	| transferring glycosyl group transferase, putative | HC | chr8:8223250-8218943 | 20130731	2	-1	1	21	1262	1282	UUCUUGCUGUAGCACCUGAAG	:::: ::::..::::::::	UGUCAGAUGCUGUAGCAAGAA	Cleavage	1
Cluster_861	UAAACAAUAGUCUGAGACAAU	21	Medtr5g090570.1	| MFS transporter | HC | chr5:39448686-39445868 | 20130731	2	-1	1	21	1210	1230	UAAACAAUAGUCUGAGACAAU	::::::.::::::: ::::	UAUGUCUCGGACUAUUUUUUA	Cleavage	1
Cluster_861	UAAACAAUAGUCUGAGACAAU	21	Medtr4g094885.1	| LRR receptor-like kinase | HC | chr4:39212942-39209093 | 20130731	2	-1	1	21	1787	1807	UAAACAAUAGUCUGAGACAAU	:::. :.::::::::::::	UGUGUUACGGACUAUUGUUUA	Cleavage	1
Cluster_865	UGUCAUUUUCGUCAAGGUCUGGGU	24	Medtr6g016855.1	| glycoside hydrolase family 81 protein | HC | chr6:6526740-6525603 | 20130731	2	-1	1	24	613	636	UGUCAUUUUCGUCAAGGUCUGGGU	:::::::::.:..::::.::	CAAGAGACCUUGAUGGGAAUGGCA	Cleavage	1
Cluster_865	UGUCAUUUUCGUCAAGGUCUGGGU	24	Medtr8g012900.2	| vacuolar iron transporter-like protein | HC | chr8:3911190-3907663 | 20130731	2	-1	1	24	304	327	UGUCAUUUUCGUCAAGGUCUGGGU	.::. ::::.::::::::::	AAGAGGAUAUUGAUGAAAAUGACA	Cleavage	1
Cluster_865	UGUCAUUUUCGUCAAGGUCUGGGU	24	Medtr8g012900.3	| vacuolar iron transporter-like protein | HC | chr8:3911732-3907663 | 20130731	2	-1	1	24	502	525	UGUCAUUUUCGUCAAGGUCUGGGU	.::. ::::.::::::::::	AAGAGGAUAUUGAUGAAAAUGACA	Cleavage	1
Cluster_865	UGUCAUUUUCGUCAAGGUCUGGGU	24	Medtr8g012900.4	| vacuolar iron transporter-like protein | HC | chr8:3911342-3907663 | 20130731	2	-1	1	24	456	479	UGUCAUUUUCGUCAAGGUCUGGGU	.::. ::::.::::::::::	AAGAGGAUAUUGAUGAAAAUGACA	Cleavage	1
Cluster_865	UGUCAUUUUCGUCAAGGUCUGGGU	24	Medtr4g077300.2	| glycylpeptide N-tetradecanoyltransferase | HC | chr4:29615945-29612579 | 20130731	2	-1	1	24	1074	1097	UGUCAUUUUCGUCAAGGUCUGGGU	:: ::..:::::::::::::..	CACCUGAUUUUGACGAAAAUGAUG	Cleavage	1
Cluster_865	UGUCAUUUUCGUCAAGGUCUGGGU	24	Medtr4g077300.3	| glycylpeptide N-tetradecanoyltransferase | HC | chr4:29615806-29612579 | 20130731	2	-1	1	24	1913	1936	UGUCAUUUUCGUCAAGGUCUGGGU	:: ::..:::::::::::::..	CACCUGAUUUUGACGAAAAUGAUG	Cleavage	1
Cluster_865	UGUCAUUUUCGUCAAGGUCUGGGU	24	Medtr4g077300.1	| glycylpeptide N-tetradecanoyltransferase | HC | chr4:29615945-29612579 | 20130731	2	-1	1	24	1074	1097	UGUCAUUUUCGUCAAGGUCUGGGU	:: ::..:::::::::::::..	CACCUGAUUUUGACGAAAAUGAUG	Cleavage	1
Cluster_865	UGUCAUUUUCGUCAAGGUCUGGGU	24	Medtr8g012900.1	| vacuolar iron transporter-like protein | HC | chr8:3911732-3907663 | 20130731	2	-1	1	24	502	525	UGUCAUUUUCGUCAAGGUCUGGGU	.::. ::::.::::::::::	AAGAGGAUAUUGAUGAAAAUGACA	Cleavage	1
Cluster_866	UGCAUCUUGUCCUUGGACAG	20	Medtr3g012050.1	| NBS-LRR type disease resistance protein | HC | chr3:3199029-3195523 | 20130731	2	-1	1	20	1118	1137	UGCAUCUUGUCCUUGGACAG	:::::::::::: :.::::	AUGUCCAAGGACAUGGUGCA	Cleavage	1
Cluster_870	UAAAAGAAUGCUCUUCCGUUGGAGA	25	Medtr2g095060.1	| Ripening related protein family | HC | chr2:40611249-40610261 | 20130731	2	-1	1	25	962	987	UAAAAGAAUGCUCUUCCGUUG-GAGA	::: : :.::: :::::::.:::::	GCUCACUAUGGAUGAGCAUUUUUUUA	Cleavage	1
Cluster_870	UAAAAGAAUGCUCUUCCGUUGGAGA	25	Medtr2g012850.1	| serine carboxypeptidase-like protein | HC | chr2:3332013-3335100 | 20130731	2	-1	1	25	173	197	UAAAAGAAUGCUCUUCCGUUGGAGA	::::.::::::::::: :::::	AAACCAAUGGAAGAGCAUUGUUUUA	Cleavage	1
Cluster_870	UAAAAGAAUGCUCUUCCGUUGGAGA	25	Medtr4g089155.1	| serine carboxypeptidase-like protein | HC | chr4:35796013-35791127 | 20130731	2	-1	1	25	280	304	UAAAAGAAUGCUCUUCCGUUGGAGA	::::.::::::::: :::::::	AAACCAAUGGAAGAGCACUCUUUUA	Cleavage	1
Cluster_873	UUUGGCAGCAAUGAACUUGGCG	22	Medtr1g095570.1	| Myb DNA-binding domain protein | HC | chr1:42995245-43004049 | 20130731	2	-1	1	22	4436	4457	UUUGGCAGCAAUGAACUUGGCG	::: :::::::.:::.:::	CUGCAAAUUCAUUGUUGCUAAA	Cleavage	1
Cluster_873	UUUGGCAGCAAUGAACUUGGCG	22	Medtr1g095570.2	| Myb DNA-binding domain protein | HC | chr1:42997648-43004049 | 20130731	2	-1	1	22	2888	2909	UUUGGCAGCAAUGAACUUGGCG	::: :::::::.:::.:::	CUGCAAAUUCAUUGUUGCUAAA	Cleavage	1
Cluster_873	UUUGGCAGCAAUGAACUUGGCG	22	Medtr6g015940.1	| cation/H+ exchanger 3 | HC | chr6:5621585-5624497 | 20130731	2	-1	1	22	1025	1046	UUUGGCAGCAAUGAACUUGGCG	: ::::::..::::::::::	GGACAAGUUUGUUGCUGCCAAU	Cleavage	1
Cluster_873	UUUGGCAGCAAUGAACUUGGCG	22	Medtr6g007663.1	| clasp amine-terminal protein | HC | chr6:1758602-1762992 | 20130731	2	-1	1	22	880	901	UUUGGCAGCAAUGAACUUGGCG	: :: : :::::::::::::::	CCCCUAUUUCAUUGCUGCCAAA	Cleavage	1
Cluster_884	UUCCUUGGACAAUAGAUUUCUGCC	24	Medtr3g103080.1	| carboxy-terminal domain cyclin | HC | chr3:47495355-47493059 | 20130731	2	-1	1	24	254	277	UUCCUUGGACAAUAGAUUUCUGCC	::::::.:::: :::::::::	AUAAGAAAUUUAUUUUCCAAGGAA	Translation	1
Cluster_884	UUCCUUGGACAAUAGAUUUCUGCC	24	Medtr4g116080.1	| hypothetical protein | HC | chr4:48006181-48004406 | 20130731	2	-1	1	24	346	369	UUCCUUGGACAAUAGAUUUCUGCC	:.::: :::::::::::.:	CCUCUAGAUCAAUUGUCCAAGGGA	Cleavage	1
Cluster_885	ACUCAGUUGGGAGAAUAGAGCCU	23	Medtr1g075680.1	| kinesin motor domain protein | HC | chr1:33531344-33535102 | 20130731	2	-1	1	23	64	86	ACUCAGUUGGGAGAAUAGAGCCU	::: :::::.::::::.::	UCAAUCUUUUCUCUCAACUGGGU	Cleavage	1
Cluster_885	ACUCAGUUGGGAGAAUAGAGCCU	23	Medtr3g040270.1	| hypothetical protein | LC | chr3:14136758-14136976 | 20130731	2	-1	1	23	147	169	ACUCAGUUGGGAGAAUAGAGCCU	:: :::::.::::.:::::	UGUGUCAAUUCUUCCAAUUGAGU	Cleavage	1
Cluster_885	ACUCAGUUGGGAGAAUAGAGCCU	23	Medtr1g022350.1	| ubiquitin-protein ligase, putative | HC | chr1:7076378-7077932 | 20130731	2	-1	1	23	169	191	ACUCAGUUGGGAGAAUAGAGCCU	.::: ::::::.:.::::::	UUCUUCUCUUCUCCUAGCUGAGU	Cleavage	1
Cluster_887	UUUUCUUAUGUUUGGUGGAGGA	22	Medtr3g449390.1	| LRR receptor-like kinase family protein | HC | chr3:16732576-16737781 | 20130731	2	-1	1	22	1652	1673	UUUUCUUAUGUUUGGUGGAGGA	.::::.::.:.:::.:::::	AAUUCCAUCAGAUAUAGGAAAA	Cleavage	1
Cluster_887	UUUUCUUAUGUUUGGUGGAGGA	22	Medtr1g115605.1	| membrane-associated kinase regulator-like protein, putative | HC | chr1:52288047-52286665 | 20130731	2	-1	1	22	36	57	UUUUCUUAUGUUUGGUGGAGGA	..::.:.::::::::.:::.:	GUUUCUAUCAAACAUAGGAAGA	Cleavage	1
Cluster_887	UUUUCUUAUGUUUGGUGGAGGA	22	Medtr5g009490.1	| plant/K16L22-9 protein, putative | HC | chr5:2274157-2273091 | 20130731	2	-1	1	22	155	176	UUUUCUUAUGUUUGGUGGAGGA	:.::.:::::: ::::::::::	UUCUUCACCAACCAUAAGAAAA	Translation	1
Cluster_890	UAAGAAUGAAAUCGUUUGGUAAGA	24	Medtr4g094415.2	| MAP kinase kinase kinase-like protein | HC | chr4:37947075-37952393 | 20130731	2	-1	1	24	1571	1593	UAAGAAUGAAAUCGUUUGGUAAGA	:.::::: :::::::::::::	AGAUGCCAAA-GAUUUCAUUCUUA	Cleavage	1
Cluster_890	UAAGAAUGAAAUCGUUUGGUAAGA	24	Medtr5g093970.1	| pectinesterase | HC | chr5:41043719-41039277 | 20130731	2	-1	1	24	677	700	UAAGAAUGAAAUCGUUUGGUAAGA	:::::.:.::::.::.:::	AUGAUCCAAAUGGUUUCGUUUUUA	Cleavage	1
Cluster_890	UAAGAAUGAAAUCGUUUGGUAAGA	24	Medtr4g094415.1	| MAP kinase kinase kinase-like protein | HC | chr4:37947229-37951969 | 20130731	2	-1	1	24	1191	1213	UAAGAAUGAAAUCGUUUGGUAAGA	:.::::: :::::::::::::	AGAUGCCAAA-GAUUUCAUUCUUA	Cleavage	1
Cluster_891	UUCUGGCAGUGAGUAGUUCUGGC	23	Medtr7g010980.1	| transmembrane protein, putative | HC | chr7:2844056-2845664 | 20130731	2	-1	1	23	298	320	UUCUGGCAGUGAGUAGUUCUGGC	:.:.::.:::::::::::.	UUAUGGAUUAUUCACUGCCAGAG	Cleavage	1
Cluster_913	AAAAAUUCGAUCCAGAAAGAU	21	Medtr7g080575.1	| sister chromatid cohesion 1 protein | HC | chr7:30681072-30668024 | 20130731	2	-1	1	21	4857	4877	AAAAAUUCGAUCCAGAAAGAU	: ::::::::.:: :::::::	AGCUUUCUGGGUCUAAUUUUU	Cleavage	1
Cluster_914	UCUACGGCAUAGAAUGAUUUGUGC	24	Medtr4g075680.5	| import inner membrane translocase subunit TIM44-2 | HC | chr4:28930030-28937107 | 20130731	2	-1	1	24	205	228	UCUACGGCAUAGAAUGAUUUGUGC	::::.::::.:::.::::.	GCUGCAAUCGUUCUGUGCUGUAGG	Cleavage	1
Cluster_94	UCGCCAUCUUUUUCCAAAAA	20	Medtr8g102620.1	| NADP-dependent malic enzyme-like protein | HC | chr8:43210084-43205119 | 20130731	2	-1	1	20	203	222	UCGCCAUCUUUUUCCAAAAA	::::::::.::::::: ::	AUUUUGGAAGAAGAUGGAGA	Cleavage	1
Cluster_94	UCGCCAUCUUUUUCCAAAAA	20	Medtr5g022045.1	| F-box protein interaction domain protein | LC | chr5:8645471-8643762 | 20130731	2	-1	1	20	445	464	UCGCCAUCUUUUUCCAAAAA	:::::::.::: :::::::	GUUUUGGAGAAAAAUGGCGA	Cleavage	1
Cluster_94	UCGCCAUCUUUUUCCAAAAA	20	Medtr2g080100.1	| G-type lectin S-receptor-like Serine/Threonine-kinase SD2-5 | HC | chr2:33811234-33813796 | 20130731	2	-1	1	20	943	962	UCGCCAUCUUUUUCCAAAAA	::::::.:::::::::.:	GUUUUGGGAAAAGAUGGUGU	Cleavage	1
Cluster_94	UCGCCAUCUUUUUCCAAAAA	20	Medtr4g076540.1	| PPR containing plant-like protein | HC | chr4:29271058-29274509 | 20130731	2	-1	1	20	1639	1658	UCGCCAUCUUUUUCCAAAAA	::: :::.:::::::::.::	UUUAUGGGAAAAGAUGGUGA	Cleavage	1
Cluster_94	UCGCCAUCUUUUUCCAAAAA	20	Medtr3g436160.1	| beta-amyrin synthase | HC | chr3:12141145-12134909 | 20130731	2	-1	1	20	70	89	UCGCCAUCUUUUUCCAAAAA	:::: :.:.::::::::::	GUUUUUGGAGAAGAUGGCGA	Cleavage	1
Cluster_94	UCGCCAUCUUUUUCCAAAAA	20	Medtr2g080090.1	| G-type lectin S-receptor-like Serine/Threonine-kinase SD2-5 | HC | chr2:33806914-33804581 | 20130731	2	-1	1	20	787	806	UCGCCAUCUUUUUCCAAAAA	::::::.:::::::::.:	GUUUUGGGAAAAGAUGGUGU	Cleavage	1
Cluster_945	UCAAGAACAGGACUGCACACAUGCC	25	Medtr8g027995.1	| formin-like 2 domain protein | HC | chr8:10328257-10323250 | 20130731	2	-1	1	25	1256	1280	UCAAGAACAGGACUGCACACAUGCC	:::::::::.::::::: :	CCGUCAUGUGCAGUCUUGUUCUUCA	Cleavage	1
Cluster_945	UCAAGAACAGGACUGCACACAUGCC	25	Medtr0045s0110.1	| DUF642 family protein | HC | scaffold0045:57939-54432 | 20130731	2	-1	1	25	1182	1206	UCAAGAACAGGACUGCACACAUGCC	: : ::..:::::::::::::	GUUCUCUCUGUGGUCCUGUUCUUGA	Cleavage	1
Cluster_946	UCAUCCAUUGUUUAAAAAAAGACUG	25	Medtr6g092620.1	| 1-aminocyclopropane-1-carboxylate oxidase | HC | chr6:34878493-34880015 | 20130731	2	-1	1	25	354	378	UCAUCCAUUGUUUAAAAAAAGACUG	.: . ::: : :::::::::::::	AGGAUCUUUGUCAAACAAUGGAUGA	Cleavage	1
Cluster_950	UAUGUCGAUAAUAUUUGUGCCU	22	Medtr8g011320.1	| NB-ARC domain disease resistance protein | LC | chr8:3001731-3005363 | 20130731	2	-1	1	22	1830	1851	UAUGUCGAUAAUAUUUGUGCCU	::::::::::::.:: :::	ACUCACAAAUAUUAUUGAAAUA	Cleavage	1
Cluster_950	UAUGUCGAUAAUAUUUGUGCCU	22	Medtr4g057795.1	| ABC transporter family protein | HC | chr4:21289605-21294134 | 20130731	2	-1	1	22	1015	1036	UAUGUCGAUAAUAUUUGUGCCU	:::::::::::::: ::::.	CUGCACAAAUAUUAUCCACAUG	Cleavage	1
Cluster_950	UAUGUCGAUAAUAUUUGUGCCU	22	Medtr4g057795.2	| ABC transporter family protein | HC | chr4:21290209-21294134 | 20130731	2	-1	1	22	1107	1128	UAUGUCGAUAAUAUUUGUGCCU	:::::::::::::: ::::.	CUGCACAAAUAUUAUCCACAUG	Cleavage	1
Cluster_952	UUCAGAUGAAGAGACAAAUGGCCU	24	Medtr3g092710.1	| plastid transcriptionally active 15 protein | HC | chr3:42360298-42362077 | 20130731	2	-1	1	24	277	300	UUCAGAUGAAGAGACAAAUGGCCU	:: :::::::::.::.::::	GGUACACUUGUCUCUUUAUUUGAA	Cleavage	1
Cluster_952	UUCAGAUGAAGAGACAAAUGGCCU	24	Medtr7g113530.1	| chaperone protein DnaJ | HC | chr7:46786981-46784228 | 20130731	2	-1	1	24	600	623	UUCAGAUGAAGAGACAAAUGGCCU	:::::::::::::: :::.:	UUCACAUUUGUCUCUUCAACUGGA	Cleavage	1
Cluster_952	UUCAGAUGAAGAGACAAAUGGCCU	24	Medtr7g113530.2	| chaperone protein DnaJ | HC | chr7:46786981-46784180 | 20130731	2	-1	1	24	600	623	UUCAGAUGAAGAGACAAAUGGCCU	:::::::::::::: :::.:	UUCACAUUUGUCUCUUCAACUGGA	Cleavage	1
Cluster_959	UUGCCAUGUAGUCCUUGAAGGAGA	24	Medtr2g034720.1	| alpha-L-arabinofuranosidase/beta-D-xylosidase | HC | chr2:13297391-13303852 | 20130731	2	-1	1	24	849	872	UUGCCAUGUAGUCCUUGAAGGAGA	:. . ::::::::.:::: :::::	UUAUGUUCAAGGAUUACAAGGCAA	Cleavage	1
Cluster_959	UUGCCAUGUAGUCCUUGAAGGAGA	24	Medtr1g049100.1	| two-component response regulator ARR3-like protein | HC | chr1:18957861-18956301 | 20130731	2	-1	1	24	392	415	UUGCCAUGUAGUCCUUGAAGGAGA	:: ::::..::::::::::	AACGAUUGAAGGGUUACAUGGCAA	Cleavage	1
miRNA_Cluster_1596	UAACAGAAGUUGUUGGAUU	19	Medtr4g076180.1	| DNA-binding; zinc ion-binding; DNA-binding protein, putative | HC | chr4:29158251-29170843 | 20130731	2	-1	1	19	3035	3053	UAACAGAAGUUGUUGGAUU	:.::::.::::::.::::.	AGUCCAGCAACUUUUGUUG	Cleavage	1
miRNA_Cluster_1596	UAACAGAAGUUGUUGGAUU	19	Medtr8g094940.1	| diacylglycerol kinase domain protein | HC | chr8:39647512-39654366 | 20130731	2	-1	1	19	2835	2853	UAACAGAAGUUGUUGGAUU	:::..:::::.::.:::::	AAUUUAACAAUUUUUGUUA	Cleavage	1
miRNA_Cluster_340	UUAAAUAGAUGUUGAACUUGGUG	23	Medtr4g018920.1	| verticillium wilt disease resistance protein | HC | chr4:5851978-5854172 | 20130731	2	-1	1	23	94	116	UUAAAUAGAUGUUGAACUUGGUG	: : ::: :::::::::::::..	CUCGAAGAUCAACAUCUAUUUGG	Cleavage	1
miRNA_Cluster_342	UAAACACUGCUGUCCUAGUGG	21	Medtr4g124470.3	| lysine-ketoglutarate reductase/saccharopine dehydrogenase | HC | chr4:51511890-51502928 | 20130731	2	-1	1	21	963	983	UAAACACUGCUGUCCUAGUGG	:::::::::::.:: ::::	GGACUAGGACAGCGGUAUUUA	Cleavage	1
miRNA_Cluster_342	UAAACACUGCUGUCCUAGUGG	21	Medtr4g124470.4	| lysine-ketoglutarate reductase/saccharopine dehydrogenase | HC | chr4:51511890-51502928 | 20130731	2	-1	1	21	725	745	UAAACACUGCUGUCCUAGUGG	:::::::::::.:: ::::	GGACUAGGACAGCGGUAUUUA	Cleavage	1
miRNA_Cluster_342	UAAACACUGCUGUCCUAGUGG	21	Medtr4g124470.2	| lysine-ketoglutarate reductase/saccharopine dehydrogenase | HC | chr4:51511890-51502928 | 20130731	2	-1	1	21	763	783	UAAACACUGCUGUCCUAGUGG	:::::::::::.:: ::::	GGACUAGGACAGCGGUAUUUA	Cleavage	1
miRNA_Cluster_342	UAAACACUGCUGUCCUAGUGG	21	Medtr4g124470.1	| lysine-ketoglutarate reductase/saccharopine dehydrogenase | HC | chr4:51511890-51502928 | 20130731	2	-1	1	21	725	745	UAAACACUGCUGUCCUAGUGG	:::::::::::.:: ::::	GGACUAGGACAGCGGUAUUUA	Cleavage	1
Cluster_1000	UAAUCAAACCAUACCAUCAGCACC	24	Medtr1g116330.1	| PRLI-interacting factor A | HC | chr1:52584673-52582147 | 20130731	2.5	-1	1	24	2063	2086	UAAUCAAACCAUACCAUCAGCACC	: .: :: ::::::::::.:::	UUUUUUAAUUGUAUGGUUUGGUUA	Cleavage	1
Cluster_1012	UACAAGUUCCAGUAGUGUAGUCUC	24	Medtr7g024190.3	| hypothetical protein | HC | chr7:7939303-7919789 | 20130731	2.5	-1	1	24	2455	2478	UACAAGUUCCAGUAGUGUAGUCUC	: :.:.::::::::: :::::	CUAAAUGCGCUACUGGAAAUUGUA	Cleavage	1
Cluster_1012	UACAAGUUCCAGUAGUGUAGUCUC	24	Medtr7g024190.1	| hypothetical protein | HC | chr7:7939374-7919789 | 20130731	2.5	-1	1	24	2526	2549	UACAAGUUCCAGUAGUGUAGUCUC	: :.:.::::::::: :::::	CUAAAUGCGCUACUGGAAAUUGUA	Cleavage	1
Cluster_1012	UACAAGUUCCAGUAGUGUAGUCUC	24	Medtr0165s0050.1	| hypothetical protein | HC | scaffold0165:32486-29558 | 20130731	2.5	-1	1	24	205	228	UACAAGUUCCAGUAGUGUAGUCUC	:: .::::::::::::::	UUCUGUAAGCUACUGGAACUUGUU	Cleavage	1
Cluster_1012	UACAAGUUCCAGUAGUGUAGUCUC	24	Medtr7g024190.2	| hypothetical protein | HC | chr7:7939303-7919789 | 20130731	2.5	-1	1	24	2455	2478	UACAAGUUCCAGUAGUGUAGUCUC	: :.:.::::::::: :::::	CUAAAUGCGCUACUGGAAAUUGUA	Cleavage	1
Cluster_1012	UACAAGUUCCAGUAGUGUAGUCUC	24	Medtr5g019940.1	| proline extensin-like receptor kinase, putative | HC | chr5:7562647-7565982 | 20130731	2.5	-1	1	24	1327	1350	UACAAGUUCCAGUAGUGUAGUCUC	:.:.. :..:::.:::::::::::	GGGGUCAUGCUAUUGGAACUUGUA	Cleavage	1
Cluster_1028	UAGAAAAAGAUCAUCGAGCUCGA	23	Medtr2g072190.3	| hydroxyacylglutathione hydrolase | HC | chr2:30330501-30334707 | 20130731	2.5	-1	1	23	687	709	UAGAAAAAGAUCAUCGAGCUCGA	:: . .:.:.:::::::::::::	UCCGUUUUGGUGAUCUUUUUCUA	Cleavage	1
Cluster_1028	UAGAAAAAGAUCAUCGAGCUCGA	23	Medtr2g072190.1	| hydroxyacylglutathione hydrolase | HC | chr2:30330475-30335065 | 20130731	2.5	-1	1	23	713	735	UAGAAAAAGAUCAUCGAGCUCGA	:: . .:.:.:::::::::::::	UCCGUUUUGGUGAUCUUUUUCUA	Cleavage	1
Cluster_1028	UAGAAAAAGAUCAUCGAGCUCGA	23	Medtr1g016340.1	| ubiquitin-protein ligase, putative | LC | chr1:4335726-4333106 | 20130731	2.5	-1	1	23	957	979	UAGAAAAAGAUCAUCGAGCUCGA	: ::: ::::::.:.:::::.::	UAGAGAUCGAUGGUUUUUUUUUA	Cleavage	1
Cluster_1028	UAGAAAAAGAUCAUCGAGCUCGA	23	Medtr2g072190.2	| hydroxyacylglutathione hydrolase | HC | chr2:30330501-30335065 | 20130731	2.5	-1	1	23	687	709	UAGAAAAAGAUCAUCGAGCUCGA	:: . .:.:.:::::::::::::	UCCGUUUUGGUGAUCUUUUUCUA	Cleavage	1
Cluster_1028	UAGAAAAAGAUCAUCGAGCUCGA	23	Medtr1g016340.2	| ubiquitin-protein ligase, putative | LC | chr1:4335726-4333214 | 20130731	2.5	-1	1	23	1243	1265	UAGAAAAAGAUCAUCGAGCUCGA	: ::: ::::::.:.:::::.::	UAGAGAUCGAUGGUUUUUUUUUA	Cleavage	1
Cluster_1029	UAUGAGAAUUAAAAGGCUG	19	Medtr5g068770.1	| lectin-like receptor kinase, putative | HC | chr5:29132699-29130239 | 20130731	2.5	-1	1	19	992	1010	UAUGAGAAUUAAAAGGCUG	.:::.::::::::.:.::.	UAGCUUUUUAAUUUUUAUG	Cleavage	1
Cluster_1029	UAUGAGAAUUAAAAGGCUG	19	Medtr1678s0010.1	| pollen protein Ole E I-like protein | LC | scaffold1678:1031-275 | 20130731	2.5	-1	1	19	38	56	UAUGAGAAUUAAAAGGCUG	::::.::::. ::::::::	CAGCUUUUUGCUUCUCAUA	Cleavage	1
Cluster_1029	UAUGAGAAUUAAAAGGCUG	19	Medtr2g059220.1	| processing peptidase | HC | chr2:24452161-24453195 | 20130731	2.5	-1	1	19	901	919	UAUGAGAAUUAAAAGGCUG	::: ::::.:::::::::	CAGAGUUUUGAUUCUCAUA	Cleavage	1
Cluster_1029	UAUGAGAAUUAAAAGGCUG	19	Medtr5g033260.1	| flavin containing monooxygenase YUCCA10-like protein | HC | chr5:14352361-14354443 | 20130731	2.5	-1	1	19	1126	1144	UAUGAGAAUUAAAAGGCUG	:: :::::::::.:::::	CAAACUUUUAAUUUUCAUA	Cleavage	1
Cluster_104	UGUUCUUAAAGGUGGUAACUUCGC	24	Medtr4g102790.2	| GRAS family transcription factor | HC | chr4:42605026-42601602 | 20130731	2.5	-1	1	24	1058	1081	UGUUCUUAAAGGUGGUAACUUCGC	.::::::.::::::. ::::	AUUCGGUUACCGCCUUUAGCAACA	Cleavage	1
Cluster_104	UGUUCUUAAAGGUGGUAACUUCGC	24	Medtr4g102790.1	| GRAS family transcription factor | HC | chr4:42605026-42601807 | 20130731	2.5	-1	1	24	1196	1219	UGUUCUUAAAGGUGGUAACUUCGC	.::::::.::::::. ::::	AUUCGGUUACCGCCUUUAGCAACA	Cleavage	1
Cluster_104	UGUUCUUAAAGGUGGUAACUUCGC	24	Medtr8g062010.1	| F-box/RNI/FBD-like domain protein | LC | chr8:25898833-25895450 | 20130731	2.5	-1	1	24	1021	1044	UGUUCUUAAAGGUGGUAACUUCGC	: ::: ::.::::::::::::::	GAGAAACUAUCACCUUUAAGAACA	Cleavage	1
Cluster_1043	UGUUUGAUUACCGGCGUACAUAGC	24	Medtr3g107740.1	| 1-deoxy-D-xylulose-5-phosphate synthase | HC | chr3:49718037-49711963 | 20130731	2.5	-1	1	24	612	635	UGUUUGAUUACCGGCGUACAUAGC	: :.:.::::.::::::::	UUGUGGGAUGUCGGUGAUCAAACA	Cleavage	1
Cluster_1043	UGUUUGAUUACCGGCGUACAUAGC	24	Medtr5g014290.1	| FeS assembly protein SufD | HC | chr5:4770231-4766770 | 20130731	2.5	-1	1	24	1076	1099	UGUUUGAUUACCGGCGUACAUAGC	::: .:..::::::::::::	CACUUGUCUGUUGGUAAUCAAACA	Cleavage	1
Cluster_1043	UGUUUGAUUACCGGCGUACAUAGC	24	Medtr3g107740.2	| 1-deoxy-D-xylulose-5-phosphate synthase | HC | chr3:49718014-49711963 | 20130731	2.5	-1	1	24	589	612	UGUUUGAUUACCGGCGUACAUAGC	: :.:.::::.::::::::	UUGUGGGAUGUCGGUGAUCAAACA	Cleavage	1
Cluster_1054	UUUUAUUAUGUUUGGUGGAGG	21	Medtr7g094470.1	| transmembrane protein, putative | HC | chr7:37605011-37600190 | 20130731	2.5	-1	1	21	389	409	UUUUAUUAUGUUUGGUGGAGG	: :::.::.:::.::::::	AAUGCACUAAGCAUGAUAAAA	Cleavage	1
Cluster_1054	UUUUAUUAUGUUUGGUGGAGG	21	Medtr8g085310.1	| Myb/SANT-like DNA-binding domain protein | LC | chr8:35335744-35339199 | 20130731	2.5	-1	1	21	1652	1672	UUUUAUUAUGUUUGGUGGAGG	:.:: ::::.:::::.:::	UAUUCAACAAAUAUAAUGAAA	Cleavage	1
Cluster_1054	UUUUAUUAUGUUUGGUGGAGG	21	Medtr8g075070.1	| hypothetical protein | LC | chr8:31735768-31735367 | 20130731	2.5	-1	1	21	97	117	UUUUAUUAUGUUUGGUGGAGG	::.::::::::.:.:::::	ACUUCACCAAACGUGAUAAAC	Cleavage	1
Cluster_1054	UUUUAUUAUGUUUGGUGGAGG	21	Medtr4g089025.1	| cytochrome P450 family 71 protein | HC | chr4:35645980-35650524 | 20130731	2.5	-1	1	21	1541	1561	UUUUAUUAUGUUUGGUGGAGG	:.::::::.::.::::::	UAGCUACCAAAUAUGAUAAAA	Cleavage	1
Cluster_1054	UUUUAUUAUGUUUGGUGGAGG	21	Medtr2g047875.1	| charged multivesicular body protein | HC | chr2:20962877-20956118 | 20130731	2.5	-1	1	21	1051	1071	UUUUAUUAUGUUUGGUGGAGG	::.: .:::::::::.:::	UAUCUAAUAAACAUAAUGAAA	Cleavage	1
Cluster_1054	UUUUAUUAUGUUUGGUGGAGG	21	Medtr4g134340.2	| snRNA activating complex family protein | HC | chr4:56241798-56237993 | 20130731	2.5	-1	1	21	1706	1726	UUUUAUUAUGUUUGGUGGAGG	..: ::.::::::::.::::.	UUUGCAUCAAACAUAGUAAAG	Cleavage	1
Cluster_1054	UUUUAUUAUGUUUGGUGGAGG	21	Medtr5g057940.2	| hypothetical protein | HC | chr5:23916116-23920207 | 20130731	2.5	-1	1	21	1145	1165	UUUUAUUAUGUUUGGUGGAGG	..:::: ::::::::: ::::	UUUCCAACAAACAUAAAAAAA	Cleavage	1
Cluster_1054	UUUUAUUAUGUUUGGUGGAGG	21	Medtr1g089980.1	| hypothetical protein | HC | chr1:40300374-40296904 | 20130731	2.5	-1	1	21	606	626	UUUUAUUAUGUUUGGUGGAGG	: ::::.:.:::.::::::	AAUGCACCGAGCAUGAUAAAA	Cleavage	1
Cluster_1054	UUUUAUUAUGUUUGGUGGAGG	21	Medtr2g087295.1	| bHLH transcription factor-like protein | HC | chr2:36707764-36700956 | 20130731	2.5	-1	1	21	100	120	UUUUAUUAUGUUUGGUGGAGG	:.:::::::::::. ::::	GAUUCACCAAACAUAGCAAAA	Cleavage	1
Cluster_1054	UUUUAUUAUGUUUGGUGGAGG	21	Medtr4g051682.1	| NB-ARC domain protein | LC | chr4:18679903-18674312 | 20130731	2.5	-1	1	21	1964	1984	UUUUAUUAUGUUUGGUGGAGG	:.::: :::::::::.:.:	GGUUCACAAAACAUAAUGAGA	Cleavage	1
Cluster_1054	UUUUAUUAUGUUUGGUGGAGG	21	Medtr8g069390.1	| phosphate transporter 2-1 | HC | chr8:29052302-29057476 | 20130731	2.5	-1	1	21	347	367	UUUUAUUAUGUUUGGUGGAGG	:.:.:::::::::::. ::::	CUUUCACCAAACAUAGCAAAA	Cleavage	1
Cluster_1054	UUUUAUUAUGUUUGGUGGAGG	21	Medtr8g071890.2	| hydrolase of sodium-potassium ATPase alpha subunit, putative | HC | chr8:30340315-30344470 | 20130731	2.5	-1	1	21	1394	1414	UUUUAUUAUGUUUGGUGGAGG	..:::: ::::::::: ::::	UUUCCAACAAACAUAAAAAAA	Cleavage	1
Cluster_1058	AAGGAAGAUAACAAGGAGAUG	21	Medtr8g106560.2	| poly(A) polymerase-like protein | HC | chr8:44967321-44960896 | 20130731	2.5	-1	1	21	276	296	AAGGAAGAUAACAAGGAGAUG	:::.::: ::::.::::::	UUUCUUCUUUUUAUUUUCCUU	Cleavage	1
Cluster_1058	AAGGAAGAUAACAAGGAGAUG	21	Medtr1g016880.2	| core-2/I-branching enzyme | HC | chr1:4543527-4538086 | 20130731	2.5	-1	1	21	64	84	AAGGAAGAUAACAAGGAGAUG	:.:.: ::::::.:.::::::	CGUUUACUUGUUGUUUUCCUU	Cleavage	1
Cluster_1058	AAGGAAGAUAACAAGGAGAUG	21	Medtr2g084835.1	| MORN domain protein | HC | chr2:35995302-35986793 | 20130731	2.5	-1	1	21	542	562	AAGGAAGAUAACAAGGAGAUG	:::::: :::::::::::	UUGCUCCUUUUUAUCUUCCUU	Cleavage	1
Cluster_1058	AAGGAAGAUAACAAGGAGAUG	21	Medtr1g100673.1	| cleavage and polyadenylation specificity factor 5 | HC | chr1:45617994-45613141 | 20130731	2.5	-1	1	21	85	105	AAGGAAGAUAACAAGGAGAUG	: :::.:::::: :::::.::	CUUCUUCUUGUUCUCUUCUUU	Cleavage	1
Cluster_1058	AAGGAAGAUAACAAGGAGAUG	21	Medtr8g106560.1	| poly(A) polymerase-like protein | HC | chr8:44967313-44960863 | 20130731	2.5	-1	1	21	349	369	AAGGAAGAUAACAAGGAGAUG	:::.::: ::::.::::::	UUUCUUCUUUUUAUUUUCCUU	Cleavage	1
Cluster_1058	AAGGAAGAUAACAAGGAGAUG	21	Medtr5g017860.1	| peroxidase family protein | HC | chr5:6610068-6608076 | 20130731	2.5	-1	1	21	1190	1210	AAGGAAGAUAACAAGGAGAUG	::::.::: :::::::.::	UUUCUCUUUGAUAUCUUCUUU	Translation	1
Cluster_1058	AAGGAAGAUAACAAGGAGAUG	21	Medtr1g016880.1	| core-2/I-branching enzyme | HC | chr1:4543527-4538086 | 20130731	2.5	-1	1	21	64	84	AAGGAAGAUAACAAGGAGAUG	:.:.: ::::::.:.::::::	CGUUUACUUGUUGUUUUCCUU	Cleavage	1
Cluster_1058	AAGGAAGAUAACAAGGAGAUG	21	Medtr8g106560.3	| poly(A) polymerase-like protein | HC | chr8:44967321-44960896 | 20130731	2.5	-1	1	21	272	292	AAGGAAGAUAACAAGGAGAUG	:::.::: ::::.::::::	UUUCUUCUUUUUAUUUUCCUU	Cleavage	1
Cluster_1058	AAGGAAGAUAACAAGGAGAUG	21	Medtr4g051980.1	| transmembrane protein, putative | HC | chr4:18809930-18809547 | 20130731	2.5	-1	1	21	186	206	AAGGAAGAUAACAAGGAGAUG	.:::::.:::::.::::.::	UAUCUCUUUGUUGUCUUUCUC	Cleavage	1
Cluster_1058	AAGGAAGAUAACAAGGAGAUG	21	Medtr2g090885.1	| PPR containing plant-like protein | HC | chr2:39016942-39020610 | 20130731	2.5	-1	1	21	549	569	AAGGAAGAUAACAAGGAGAUG	::::.:: ::::::::.::	UUUCUCUUUUUUAUCUUCUUU	Cleavage	1
Cluster_1058	AAGGAAGAUAACAAGGAGAUG	21	Medtr8g014500.2	| LysM type receptor kinase | HC | chr8:4562544-4556518 | 20130731	2.5	-1	1	21	299	319	AAGGAAGAUAACAAGGAGAUG	: :.:..:::::.:::::.::	CUUUUUUUUGUUGUCUUCUUU	Cleavage	1
Cluster_1058	AAGGAAGAUAACAAGGAGAUG	21	Medtr2g090885.3	| PPR containing plant-like protein | HC | chr2:39016932-39020610 | 20130731	2.5	-1	1	21	1587	1607	AAGGAAGAUAACAAGGAGAUG	::::.:: ::::::::.::	UUUCUCUUUUUUAUCUUCUUU	Cleavage	1
Cluster_1058	AAGGAAGAUAACAAGGAGAUG	21	Medtr2g090885.2	| PPR containing plant-like protein | HC | chr2:39016932-39020610 | 20130731	2.5	-1	1	21	508	528	AAGGAAGAUAACAAGGAGAUG	::::.:: ::::::::.::	UUUCUCUUUUUUAUCUUCUUU	Cleavage	1
Cluster_1058	AAGGAAGAUAACAAGGAGAUG	21	Medtr2g101360.2	| proteinaceous RNase P | HC | chr2:43577836-43582278 | 20130731	2.5	-1	1	21	369	389	AAGGAAGAUAACAAGGAGAUG	::::.::::: ::::.:::	UCUCUCUUUGUUUUCUUUCUU	Cleavage	1
Cluster_1058	AAGGAAGAUAACAAGGAGAUG	21	Medtr2g090885.4	| PPR containing plant-like protein | HC | chr2:39016932-39020610 | 20130731	2.5	-1	1	21	1456	1476	AAGGAAGAUAACAAGGAGAUG	::::.:: ::::::::.::	UUUCUCUUUUUUAUCUUCUUU	Cleavage	1
Cluster_1058	AAGGAAGAUAACAAGGAGAUG	21	Medtr8g014500.3	| LysM type receptor kinase | HC | chr8:4562544-4556507 | 20130731	2.5	-1	1	21	299	319	AAGGAAGAUAACAAGGAGAUG	: :.:..:::::.:::::.::	CUUUUUUUUGUUGUCUUCUUU	Cleavage	1
Cluster_1058	AAGGAAGAUAACAAGGAGAUG	21	Medtr8g014500.5	| LysM type receptor kinase | HC | chr8:4562544-4556518 | 20130731	2.5	-1	1	21	299	319	AAGGAAGAUAACAAGGAGAUG	: :.:..:::::.:::::.::	CUUUUUUUUGUUGUCUUCUUU	Cleavage	1
Cluster_1058	AAGGAAGAUAACAAGGAGAUG	21	Medtr7g091460.1	| villin | HC | chr7:36172702-36160645 | 20130731	2.5	-1	1	21	474	494	AAGGAAGAUAACAAGGAGAUG	: :.::::: :::::::.:::	CUUUUCCUUCUUAUCUUUCUU	Cleavage	1
Cluster_1058	AAGGAAGAUAACAAGGAGAUG	21	Medtr1g104520.1	| hypothetical protein | HC | chr1:47067612-47066736 | 20130731	2.5	-1	1	21	72	92	AAGGAAGAUAACAAGGAGAUG	: :::.::::::::.: ::::	CUUCUUCUUGUUAUUUACCUU	Cleavage	1
Cluster_1058	AAGGAAGAUAACAAGGAGAUG	21	Medtr2g056150.1	| transmembrane protein, putative | HC | chr2:24072710-24072327 | 20130731	2.5	-1	1	21	186	206	AAGGAAGAUAACAAGGAGAUG	.:::::.:::::.::::.::	UAUCUCUUUGUUGUCUUUCUC	Cleavage	1
Cluster_1058	AAGGAAGAUAACAAGGAGAUG	21	Medtr8g014500.4	| LysM type receptor kinase | HC | chr8:4562544-4556507 | 20130731	2.5	-1	1	21	299	319	AAGGAAGAUAACAAGGAGAUG	: :.:..:::::.:::::.::	CUUUUUUUUGUUGUCUUCUUU	Cleavage	1
Cluster_1058	AAGGAAGAUAACAAGGAGAUG	21	Medtr4g054200.1	| hypothetical protein | LC | chr4:19651374-19650296 | 20130731	2.5	-1	1	21	692	712	AAGGAAGAUAACAAGGAGAUG	:.::.:::: :::::::::	AUUUUCUUUGUGAUCUUCCUU	Translation	1
Cluster_1058	AAGGAAGAUAACAAGGAGAUG	21	Medtr2g101360.1	| proteinaceous RNase P | HC | chr2:43577817-43582278 | 20130731	2.5	-1	1	21	388	408	AAGGAAGAUAACAAGGAGAUG	::::.::::: ::::.:::	UCUCUCUUUGUUUUCUUUCUU	Cleavage	1
Cluster_1058	AAGGAAGAUAACAAGGAGAUG	21	Medtr3g117120.1	| BZIP transcription factor bZIP124 | HC | chr3:54790583-54791957 | 20130731	2.5	-1	1	21	415	435	AAGGAAGAUAACAAGGAGAUG	:.::. ::::.::::::::	UCUUUCUCUGUUGUCUUCCUU	Cleavage	1
Cluster_1058	AAGGAAGAUAACAAGGAGAUG	21	Medtr8g014500.1	| LysM type receptor kinase | HC | chr8:4562544-4556507 | 20130731	2.5	-1	1	21	299	319	AAGGAAGAUAACAAGGAGAUG	: :.:..:::::.:::::.::	CUUUUUUUUGUUGUCUUCUUU	Cleavage	1
Cluster_106	ACGUCCAUAUCAAAAGGUUGAU	22	Medtr2g078690.1	| PPR containing plant-like protein | HC | chr2:32882427-32884704 | 20130731	2.5	-1	1	22	551	572	ACGUCCAUAUCAAAAGGUUGAU	: .::::::::.::::.::	CGGACUCUUUUGAUGUGGAUGU	Cleavage	1
Cluster_106	ACGUCCAUAUCAAAAGGUUGAU	22	Medtr2g060630.1	| PPR containing plant-like protein | HC | chr2:25711944-25710341 | 20130731	2.5	-1	1	22	619	640	ACGUCCAUAUCAAAAGGUUGAU	: .::::::::.::::.::	CGGACUCUUUUGAUGUGGAUGU	Cleavage	1
Cluster_106	ACGUCCAUAUCAAAAGGUUGAU	22	Medtr7g075210.1	| PPR superfamily protein | LC | chr7:28087993-28086890 | 20130731	2.5	-1	1	22	622	643	ACGUCCAUAUCAAAAGGUUGAU	: .::::::::.::::.::	CGGACUCUUUUGAUGUGGAUGU	Cleavage	1
Cluster_106	ACGUCCAUAUCAAAAGGUUGAU	22	Medtr1g079860.1	| hypothetical protein | LC | chr1:35480380-35479050 | 20130731	2.5	-1	1	22	190	211	ACGUCCAUAUCAAAAGGUUGAU	: .::::::::.::::.::	CGGACUCUUUUGAUGUGGAUGU	Cleavage	1
Cluster_1060	UGAGAUAAACUUCCAGUAGAUGCUC	25	Medtr8g101585.1	| hypothetical protein | HC | chr8:42695545-42696745 | 20130731	2.5	-1	1	25	526	550	UGAGAUAAACUUCCAGUAGAUGCUC	:::::.:. :::::::::::::.:	UAGCAUUUGGUGGAAGUUUAUCUUA	Cleavage	1
Cluster_1063	UAUACCAUGAUCAGUAAGGAUUU	23	Medtr6g086485.1	| hypothetical protein | HC | chr6:32537808-32537232 | 20130731	2.5	-1	1	23	391	413	UAUACCAUGAUCAGUAAGGAUUU	.: :..:::::::::::::	UGGGUCAUGUUGAUCAUGGUAUA	Cleavage	1
Cluster_1063	UAUACCAUGAUCAGUAAGGAUUU	23	Medtr1g016830.1	| hypothetical protein | HC | chr1:4517762-4518777 | 20130731	2.5	-1	1	23	395	417	UAUACCAUGAUCAGUAAGGAUUU	::::.::::.:::::.::	GUCGACUUAUUGAUUAUGGUGUA	Cleavage	1
Cluster_1065	UCAGAUAAUCCGGAUAGAAACCG	23	Medtr4g109040.2	| actin-binding FH2 (formin-like) protein | LC | chr4:45215879-45203395 | 20130731	2.5	-1	1	23	1252	1274	UCAGAUAAUCCGGAUAGAAACCG	:: ::::.:::::.:.:::	ACCCUUGUAUCUGGAUUGUUUGA	Cleavage	1
Cluster_1065	UCAGAUAAUCCGGAUAGAAACCG	23	Medtr3g049990.1	| DEAD-box ATP-dependent RNA helicase | HC | chr3:19680414-19670656 | 20130731	2.5	-1	1	23	1346	1368	UCAGAUAAUCCGGAUAGAAACCG	:: :: :::..::::::::::.	AGGAUUAUAUUUGGAUUAUCUGG	Cleavage	1
Cluster_1065	UCAGAUAAUCCGGAUAGAAACCG	23	Medtr1g115950.2	| hypothetical protein | HC | chr1:52395851-52389745 | 20130731	2.5	-1	1	23	882	903	UCAGAUAAUCCGGAUAGAAACCG	::::. :::::::::::::	CCAGUUCUG-CCGGAUUAUCUGA	Cleavage	1
Cluster_1065	UCAGAUAAUCCGGAUAGAAACCG	23	Medtr1g115950.1	| hypothetical protein | HC | chr1:52395851-52389745 | 20130731	2.5	-1	1	23	773	794	UCAGAUAAUCCGGAUAGAAACCG	::::. :::::::::::::	CCAGUUCUG-CCGGAUUAUCUGA	Cleavage	1
Cluster_1065	UCAGAUAAUCCGGAUAGAAACCG	23	Medtr4g109040.1	| actin-binding FH2 (formin-like) protein | LC | chr4:45215879-45203395 | 20130731	2.5	-1	1	23	1252	1274	UCAGAUAAUCCGGAUAGAAACCG	:: ::::.:::::.:.:::	ACCCUUGUAUCUGGAUUGUUUGA	Cleavage	1
Cluster_1065	UCAGAUAAUCCGGAUAGAAACCG	23	Medtr1g115950.3	| hypothetical protein | HC | chr1:52395637-52389745 | 20130731	2.5	-1	1	23	681	702	UCAGAUAAUCCGGAUAGAAACCG	::::. :::::::::::::	CCAGUUCUG-CCGGAUUAUCUGA	Cleavage	1
Cluster_1066	AUAUGGUAAGAAGGAUCUUGGUG	23	Medtr5g096660.1	| phosphoribulokinase/uridine kinase | HC | chr5:42271152-42278841 | 20130731	2.5	-1	1	23	542	564	AUAUGGUAAGAAGGAUCUUGGUG	:.::.:::.:::.::::::::	AAUCAGGAUUCUUUUUACCAUAA	Cleavage	1
Cluster_1066	AUAUGGUAAGAAGGAUCUUGGUG	23	Medtr1g035400.1	| histone-lysine N-methyltransferase, suvh protein | LC | chr1:12846365-12848101 | 20130731	2.5	-1	1	23	898	920	AUAUGGUAAGAAGGAUCUUGGUG	: :::::::::::::...:::	AAGCAAGAUCCUUCUUGUUAUAA	Cleavage	1
Cluster_1066	AUAUGGUAAGAAGGAUCUUGGUG	23	Medtr0496s0030.1	| hypothetical protein | LC | scaffold0496:10772-9821 | 20130731	2.5	-1	1	23	99	121	AUAUGGUAAGAAGGAUCUUGGUG	.:.:: .::::::.::::::	UCAUAGGAGUCUUCUUGCCAUAU	Cleavage	1
Cluster_1066	AUAUGGUAAGAAGGAUCUUGGUG	23	Medtr1g492590.1	| myotubularin-like phosphatase II-like protein | HC | chr1:41492886-41498166 | 20130731	2.5	-1	1	23	1752	1774	AUAUGGUAAGAAGGAUCUUGGUG	::. . :.::::::::::.::::	CAUGGUGGUCCUUCUUACUAUAU	Cleavage	1
Cluster_107	UUUAGGAUACAUGUGGAUACA	21	Medtr5g042560.1	| ERD (early-responsive to dehydration stress) family protein | HC | chr5:18698036-18704669 | 20130731	2.5	-1	1	21	220	240	UUUAGGAUACAUGUGGAUACA	::::.::::::.:..:.::	AAUAUCUACAUGUGUUUUGAA	Cleavage	1
Cluster_107	UUUAGGAUACAUGUGGAUACA	21	Medtr8g063900.1	| potassium transporter-like protein | HC | chr8:26798484-26794510 | 20130731	2.5	-1	1	21	708	728	UUUAGGAUACAUGUGGAUACA	::::::.::::.::::.:	GCUAUCCAUAUGUGUCCUGAU	Cleavage	1
Cluster_1071	UCGUAAUGUUCUCGAUUGUUGCCU	24	Medtr6g016175.1	| endonuclease/exonuclease/phosphatase family protein | LC | chr6:5863870-5867677 | 20130731	2.5	-1	1	24	958	981	UCGUAAUGUUCUCGAUUGUUGCCU	::::::::::: ::::::::.:.	UGGCAACAAUCGCGAACAUUAUGG	Cleavage	1
Cluster_1084	UAAGGAGAUGAAUGACUAGGACU	23	Medtr7g104050.1	| growth-regulating factor | HC | chr7:42091020-42093749 | 20130731	2.5	-1	1	23	461	483	UAAGGAGAUGAAUGACUAGGACU	::::.: :::::::::::::::	AGUCUUCUUCAUUCAUCUCCUUA	Cleavage	1
Cluster_1084	UAAGGAGAUGAAUGACUAGGACU	23	Medtr4g051605.1	| receptor kinase TMK1-like protein | HC | chr4:18571023-18574246 | 20130731	2.5	-1	1	23	1563	1585	UAAGGAGAUGAAUGACUAGGACU	.:.::.:::.:::::.:::	UGCAUUGGUUAUUUAUCUCUUUA	Cleavage	1
Cluster_1084	UAAGGAGAUGAAUGACUAGGACU	23	Medtr7g104050.2	| growth-regulating factor | HC | chr7:42091020-42093749 | 20130731	2.5	-1	1	23	461	483	UAAGGAGAUGAAUGACUAGGACU	::::.: :::::::::::::::	AGUCUUCUUCAUUCAUCUCCUUA	Cleavage	1
Cluster_1109	UAACAAUAUGUAGUAACUGUGACC	24	Medtr6g009080.1	| ABC transporter B family protein | HC | chr6:2597525-2595800 | 20130731	2.5	-1	1	24	129	152	UAACAAUAUGUAGUAACUGUGACC	::::::.::.::.:::::	GCAACCAGUUAUUAUAUGUUGUUU	Cleavage	1
Cluster_1109	UAACAAUAUGUAGUAACUGUGACC	24	Medtr8g032770.1	| DUF4378 domain protein | HC | chr8:12568486-12571728 | 20130731	2.5	-1	1	24	1398	1421	UAACAAUAUGUAGUAACUGUGACC	.:: :::::::::::::: :	CAAAGCAAUUACUACAUAUUGUCA	Cleavage	1
Cluster_1112	UAAUCCAGAUGUCACUAUGACUG	23	Medtr8g057880.1	| PIF1-like helicase | LC | chr8:19961008-19964357 | 20130731	2.5	-1	1	23	182	204	UAAUCCAGAUGUCACUAUGACUG	::: :::.:.::::::::.	ACACCAUUGUGGCGUCUGGAUUG	Cleavage	1
Cluster_1112	UAAUCCAGAUGUCACUAUGACUG	23	Medtr5g018390.1	| hydroxyproline-rich glycoprotein family protein, putative | HC | chr5:6856802-6850645 | 20130731	2.5	-1	1	23	2118	2140	UAAUCCAGAUGUCACUAUGACUG	:::: ::.::::::::::	CGUGCAUAUUGGCAUCUGGAUUC	Cleavage	1
Cluster_1114	UUUUGCAACAAUCACCAAUAGCCU	24	Medtr3g095780.1	| transducin/WD-like repeat-protein | HC | chr3:43759973-43764907 | 20130731	2.5	-1	1	24	102	125	UUUUGCAACAAUCACCAAUAGCCU	: :::::.::::::::.:.	UAUAGAGUGGUGGUUGUUGCAGAG	Cleavage	1
Cluster_1115	UUCUUCAUCUGUGGAAAACUUGGUC	25	Medtr2g039340.1	| cytokinin oxidase/dehydrogenase-like protein | HC | chr2:17242945-17246537 | 20130731	2.5	-1	1	25	774	798	UUCUUCAUCUGUGGAAAACUUGGUC	::. :::::::::::: :::::	UUCCGCAUUUUCCACAGAUCAAGAA	Cleavage	1
Cluster_1115	UUCUUCAUCUGUGGAAAACUUGGUC	25	Medtr2g054840.1	| cytosine-specific methyltransferase, putative | HC | chr2:23456903-23457398 | 20130731	2.5	-1	1	25	8	32	UUCUUCAUCUGUGGAAAACUUGGUC	.: ::::::.::::::: :::.:	AUUCUAGUUUUUCACAGAUAAAGGA	Cleavage	1
Cluster_1115	UUCUUCAUCUGUGGAAAACUUGGUC	25	Medtr5g019350.1	| PPR containing plant-like protein | HC | chr5:7301729-7299565 | 20130731	2.5	-1	1	25	709	733	UUCUUCAUCUGUGGAAAACUUGGUC	::::: :::.::::::::::	AAAGAAGUUGGCCAUAGAUGAAGAA	Cleavage	1
Cluster_1115	UUCUUCAUCUGUGGAAAACUUGGUC	25	Medtr5g006600.1	| RNA-directed DNA methylation protein | HC | chr5:1002761-995808 | 20130731	2.5	-1	1	25	183	207	UUCUUCAUCUGUGGAAAACUUGGUC	:.:::::::::::..:::::: ::	CAUCAAGUUUUCCAUGGAUGAACAA	Cleavage	1
Cluster_1115	UUCUUCAUCUGUGGAAAACUUGGUC	25	Medtr5g015490.1	| GRAS family transcription factor | HC | chr5:5366627-5364696 | 20130731	2.5	-1	1	25	386	410	UUCUUCAUCUGUGGAAAACUUGGUC	.::: ::::.::..:::::::::	CUUCAACUUUUUCAUGGAUGAAGAA	Cleavage	1
Cluster_1117	UUUCGACUUUGGGAAGCUUCAAGU	24	Medtr4g070910.2	| NOP56-like pre RNA processing ribonucleoprotein | HC | chr4:26711884-26716715 | 20130731	2.5	-1	1	24	221	244	UUUCGACUUUGGGAAGCUUCAAGU	::::::.:.:::::.::..	AAGGAAAGCUUUCUAAAGUUGAGG	Cleavage	1
Cluster_1117	UUUCGACUUUGGGAAGCUUCAAGU	24	Medtr4g417260.1	| verticillium wilt resistance-like protein | HC | chr4:5348945-5345613 | 20130731	2.5	-1	1	24	1549	1572	UUUCGACUUUGGGAAGCUUCAAGU	:. : : ::::.:::::::.::.:	AUGUCAUGCUUUCCAAAGUUGAGA	Cleavage	1
Cluster_1117	UUUCGACUUUGGGAAGCUUCAAGU	24	Medtr4g070910.1	| NOP56-like pre RNA processing ribonucleoprotein | HC | chr4:26711900-26716625 | 20130731	2.5	-1	1	24	211	234	UUUCGACUUUGGGAAGCUUCAAGU	::::::.:.:::::.::..	AAGGAAAGCUUUCUAAAGUUGAGG	Cleavage	1
Cluster_1128	AAUUCUAUGUAAAUCGGUUUAUG	23	Medtr3g108080.2	| embryo defective 2410 protein | HC | chr3:49945038-49933564 | 20130731	2.5	-1	1	23	2259	2281	AAUUCUAUGUAAAUCGGUUUAUG	.::::::::.::.:::::	GUGUUGCCGAUUUAUAUGGAAUU	Cleavage	1
Cluster_1128	AAUUCUAUGUAAAUCGGUUUAUG	23	Medtr3g108080.1	| embryo defective 2410 protein | HC | chr3:49945022-49930645 | 20130731	2.5	-1	1	23	2243	2265	AAUUCUAUGUAAAUCGGUUUAUG	.::::::::.::.:::::	GUGUUGCCGAUUUAUAUGGAAUU	Cleavage	1
Cluster_1129	UACCGGAACCAAUUUCUUGAACGU	24	Medtr2g105190.1	| multidrug resistance-associated protein ABC domain protein | HC | chr2:45361236-45347509 | 20130731	2.5	-1	1	24	1982	2005	UACCGGAACCAAUUUCUUGAACGU	:: .:::..::::::::::::	UUAUUGGAGAGGUUGGUUCCGGUA	Cleavage	1
Cluster_1129	UACCGGAACCAAUUUCUUGAACGU	24	Medtr2g105190.2	| multidrug resistance-associated protein ABC domain protein | HC | chr2:45361303-45347132 | 20130731	2.5	-1	1	24	2031	2054	UACCGGAACCAAUUUCUUGAACGU	:: .:::..::::::::::::	UUAUUGGAGAGGUUGGUUCCGGUA	Cleavage	1
Cluster_113	UUCCAGAGGAUCUUAUAGAC	20	Medtr8g095030.3	| LRR receptor-like kinase | HC | chr8:39718448-39714011 | 20130731	2.5	-1	1	20	562	581	UUCCAGAGGAUCUUAUAGAC	::::: .:::..:::::::	UUCUAUUGGAUUUUCUGGAA	Cleavage	1
Cluster_113	UUCCAGAGGAUCUUAUAGAC	20	Medtr7g017360.3	| phosphatidylinositol 3- and 4-kinase | HC | chr7:5508543-5512620 | 20130731	2.5	-1	1	20	1387	1406	UUCCAGAGGAUCUUAUAGAC	: :.:::::::::.::::.	AUAUGUAAGAUCCUUUGGAG	Cleavage	1
Cluster_113	UUCCAGAGGAUCUUAUAGAC	20	Medtr7g017360.2	| phosphatidylinositol 3- and 4-kinase | HC | chr7:5507737-5512620 | 20130731	2.5	-1	1	20	282	301	UUCCAGAGGAUCUUAUAGAC	: :.:::::::::.::::.	AUAUGUAAGAUCCUUUGGAG	Cleavage	1
Cluster_113	UUCCAGAGGAUCUUAUAGAC	20	Medtr8g095030.1	| LRR receptor-like kinase | HC | chr8:39718448-39714011 | 20130731	2.5	-1	1	20	562	581	UUCCAGAGGAUCUUAUAGAC	::::: .:::..:::::::	UUCUAUUGGAUUUUCUGGAA	Cleavage	1
Cluster_113	UUCCAGAGGAUCUUAUAGAC	20	Medtr7g017360.5	| phosphatidylinositol 3- and 4-kinase | HC | chr7:5508543-5512620 | 20130731	2.5	-1	1	20	1561	1580	UUCCAGAGGAUCUUAUAGAC	: :.:::::::::.::::.	AUAUGUAAGAUCCUUUGGAG	Cleavage	1
Cluster_113	UUCCAGAGGAUCUUAUAGAC	20	Medtr8g095030.2	| LRR receptor-like kinase | HC | chr8:39718139-39714035 | 20130731	2.5	-1	1	20	364	383	UUCCAGAGGAUCUUAUAGAC	::::: .:::..:::::::	UUCUAUUGGAUUUUCUGGAA	Cleavage	1
Cluster_113	UUCCAGAGGAUCUUAUAGAC	20	Medtr7g017360.4	| phosphatidylinositol 3- and 4-kinase | HC | chr7:5509000-5512620 | 20130731	2.5	-1	1	20	1079	1098	UUCCAGAGGAUCUUAUAGAC	: :.:::::::::.::::.	AUAUGUAAGAUCCUUUGGAG	Cleavage	1
Cluster_113	UUCCAGAGGAUCUUAUAGAC	20	Medtr7g017360.6	| phosphatidylinositol 3- and 4-kinase | HC | chr7:5507713-5512620 | 20130731	2.5	-1	1	20	2353	2372	UUCCAGAGGAUCUUAUAGAC	: :.:::::::::.::::.	AUAUGUAAGAUCCUUUGGAG	Cleavage	1
Cluster_113	UUCCAGAGGAUCUUAUAGAC	20	Medtr7g017360.1	| phosphatidylinositol 3- and 4-kinase | HC | chr7:5507718-5512620 | 20130731	2.5	-1	1	20	288	307	UUCCAGAGGAUCUUAUAGAC	: :.:::::::::.::::.	AUAUGUAAGAUCCUUUGGAG	Cleavage	1
Cluster_113	UUCCAGAGGAUCUUAUAGAC	20	Medtr7g017360.7	| phosphatidylinositol 3- and 4-kinase | HC | chr7:5509617-5512620 | 20130731	2.5	-1	1	20	302	321	UUCCAGAGGAUCUUAUAGAC	: :.:::::::::.::::.	AUAUGUAAGAUCCUUUGGAG	Cleavage	1
Cluster_1131	UAAAUUCAGGAUGAUGAGAUAACC	24	Medtr2g036600.2	| lysine-tRNA ligase-like protein | HC | chr2:15837510-15843281 | 20130731	2.5	-1	1	24	662	685	UAAAUUCAGGAUGAUGAGAUAACC	::. ::::: ::::::::::::	AUUUGACUCAUAAUCCUGAAUUUA	Cleavage	1
Cluster_1131	UAAAUUCAGGAUGAUGAGAUAACC	24	Medtr2g036600.1	| lysine-tRNA ligase-like protein | HC | chr2:15835394-15843395 | 20130731	2.5	-1	1	24	1149	1172	UAAAUUCAGGAUGAUGAGAUAACC	::. ::::: ::::::::::::	AUUUGACUCAUAAUCCUGAAUUUA	Cleavage	1
Cluster_1131	UAAAUUCAGGAUGAUGAGAUAACC	24	Medtr8g079240.1	| autophagy-like protein | HC | chr8:33771318-33765931 | 20130731	2.5	-1	1	24	527	550	UAAAUUCAGGAUGAUGAGAUAACC	::::::::::.:: :::::.	GCAAAUCUCAUCAUUCUAAAUUUG	Cleavage	1
Cluster_1131	UAAAUUCAGGAUGAUGAGAUAACC	24	Medtr3g052810.1	| hypothetical protein | HC | chr3:20912669-20913457 | 20130731	2.5	-1	1	24	215	238	UAAAUUCAGGAUGAUGAGAUAACC	:: :.:::::.:::::..:::.	CUUUCUUUCAUCGUCCUGGGUUUG	Cleavage	1
Cluster_1131	UAAAUUCAGGAUGAUGAGAUAACC	24	Medtr8g073195.1	| hypothetical protein | LC | chr8:30983430-30982958 | 20130731	2.5	-1	1	24	76	99	UAAAUUCAGGAUGAUGAGAUAACC	:: ::::: :::::::::::	AACGAUAUCAUCUUCCUGAAUUUA	Cleavage	1
Cluster_1131	UAAAUUCAGGAUGAUGAGAUAACC	24	Medtr1g041595.1	| hypothetical protein | LC | chr1:15604776-15606062 | 20130731	2.5	-1	1	24	287	310	UAAAUUCAGGAUGAUGAGAUAACC	:: .::.::::::.:::::	UUGAUUCAUAUUAUCCUGGAUUUA	Cleavage	1
Cluster_1131	UAAAUUCAGGAUGAUGAGAUAACC	24	Medtr8g079240.2	| autophagy-like protein | HC | chr8:33771318-33765931 | 20130731	2.5	-1	1	24	527	550	UAAAUUCAGGAUGAUGAGAUAACC	::::::::::.:: :::::.	GCAAAUCUCAUCAUUCUAAAUUUG	Cleavage	1
Cluster_1131	UAAAUUCAGGAUGAUGAGAUAACC	24	Medtr4g114580.1	| RabGAP/TBC domain protein | HC | chr4:47118501-47122390 | 20130731	2.5	-1	1	24	1073	1096	UAAAUUCAGGAUGAUGAGAUAACC	:::: :::::::.::::::::	AAUUAUGGCAUCAUCUUGAAUUUA	Cleavage	1
Cluster_1131	UAAAUUCAGGAUGAUGAGAUAACC	24	Medtr8g017060.1	| hypothetical protein | HC | chr8:5736320-5735661 | 20130731	2.5	-1	1	24	281	304	UAAAUUCAGGAUGAUGAGAUAACC	:::::: .:::::::::::	GUGCAUCUCAAUAUCCUGAAUUUU	Cleavage	1
Cluster_1131	UAAAUUCAGGAUGAUGAGAUAACC	24	Medtr3g108300.1	| hypothetical protein | LC | chr3:50034390-50032920 | 20130731	2.5	-1	1	24	77	100	UAAAUUCAGGAUGAUGAGAUAACC	:::::: .:::::::::::	GUGCAUCUCAAUAUCCUGAAUUUU	Cleavage	1
Cluster_1131	UAAAUUCAGGAUGAUGAGAUAACC	24	Medtr3g108270.1	| hypothetical protein | LC | chr3:50020289-50019576 | 20130731	2.5	-1	1	24	281	304	UAAAUUCAGGAUGAUGAGAUAACC	:::::: .:::::::::::	GUGCAUCUCAAUAUCCUGAAUUUU	Cleavage	1
Cluster_1131	UAAAUUCAGGAUGAUGAGAUAACC	24	Medtr1g106855.2	| protein phosphatase 2C family protein | HC | chr1:48356155-48358824 | 20130731	2.5	-1	1	24	198	221	UAAAUUCAGGAUGAUGAGAUAACC	:::::::::::: :::::	UAAAUUCUCAUCAUCCUCAAUUUC	Cleavage	1
Cluster_1131	UAAAUUCAGGAUGAUGAGAUAACC	24	Medtr1g106855.1	| protein phosphatase 2C family protein | HC | chr1:48356084-48359019 | 20130731	2.5	-1	1	24	269	292	UAAAUUCAGGAUGAUGAGAUAACC	:::::::::::: :::::	UAAAUUCUCAUCAUCCUCAAUUUC	Cleavage	1
Cluster_1131	UAAAUUCAGGAUGAUGAGAUAACC	24	Medtr3g052820.1	| hypothetical protein | HC | chr3:20920787-20921380 | 20130731	2.5	-1	1	24	215	238	UAAAUUCAGGAUGAUGAGAUAACC	:: :.:::::.:::::..:::.	CUUUCUUUCAUCGUCCUGGGUUUG	Cleavage	1
Cluster_1142	AAAGGAUUGAACUGGUCAA	19	Medtr6g053260.1	| F-box and associated interaction domain protein | LC | chr6:19123038-19126671 | 20130731	2.5	-1	1	19	938	956	AAAGGAUUGAACUGGUCAA	::::.::: ::::::.:::	UUGAUCAGCUCAAUCUUUU	Translation	1
Cluster_1142	AAAGGAUUGAACUGGUCAA	19	Medtr5g097490.2	| WRKY family transcription factor | HC | chr5:42707757-42704154 | 20130731	2.5	-1	1	19	105	123	AAAGGAUUGAACUGGUCAA	::::.:::::::::. :::	UUGAUCAGUUCAAUUGUUU	Cleavage	1
Cluster_1142	AAAGGAUUGAACUGGUCAA	19	Medtr6g465300.2	| ABC transporter family protein | HC | chr6:23141535-23132336 | 20130731	2.5	-1	1	19	1039	1057	AAAGGAUUGAACUGGUCAA	: :: ::::::.:::::::	UAGAACAGUUCGAUCCUUU	Cleavage	1
Cluster_1142	AAAGGAUUGAACUGGUCAA	19	Medtr5g097490.3	| WRKY family transcription factor | HC | chr5:42707757-42704154 | 20130731	2.5	-1	1	19	105	123	AAAGGAUUGAACUGGUCAA	::::.:::::::::. :::	UUGAUCAGUUCAAUUGUUU	Cleavage	1
Cluster_1142	AAAGGAUUGAACUGGUCAA	19	Medtr7g451010.1	| dynamin-like protein 1E | HC | chr7:17112594-17102962 | 20130731	2.5	-1	1	19	2258	2276	AAAGGAUUGAACUGGUCAA	:: :...::::::::::::	UUUAUUGGUUCAAUCCUUU	Cleavage	1
Cluster_1142	AAAGGAUUGAACUGGUCAA	19	Medtr5g085170.1	| SWI/SNF complex subunit SWI3B-like protein | HC | chr5:36752674-36753975 | 20130731	2.5	-1	1	19	1226	1244	AAAGGAUUGAACUGGUCAA	::::.::: ::::::.:::	UUGAUCAGCUCAAUCUUUU	Translation	1
Cluster_1142	AAAGGAUUGAACUGGUCAA	19	Medtr4g048070.1	| succinate dehydrogenase subunit 3 | HC | chr4:16983359-16977425 | 20130731	2.5	-1	1	19	406	424	AAAGGAUUGAACUGGUCAA	: :::::::::::.::::	CUAACCAGUUCAAUUCUUU	Cleavage	1
Cluster_1142	AAAGGAUUGAACUGGUCAA	19	Medtr3g116120.1	| SWI/SNF complex subunit SWI3B-like protein | HC | chr3:54294108-54291302 | 20130731	2.5	-1	1	19	1424	1442	AAAGGAUUGAACUGGUCAA	::::.::: ::::::.:::	UUGAUCAGCUCAAUCUUUU	Translation	1
Cluster_1142	AAAGGAUUGAACUGGUCAA	19	Medtr6g465300.1	| ABC transporter family protein | HC | chr6:23141535-23133971 | 20130731	2.5	-1	1	19	1039	1057	AAAGGAUUGAACUGGUCAA	: :: ::::::.:::::::	UAGAACAGUUCGAUCCUUU	Cleavage	1
Cluster_1142	AAAGGAUUGAACUGGUCAA	19	Medtr0339s0030.1	| thylakoid lumenal 16.5 kDa protein | HC | scaffold0339:14781-17495 | 20130731	2.5	-1	1	19	290	308	AAAGGAUUGAACUGGUCAA	:::::::::...::::::	AUGACCAGUUUGGUCCUUU	Cleavage	1
Cluster_1142	AAAGGAUUGAACUGGUCAA	19	Medtr5g097490.1	| WRKY family transcription factor | HC | chr5:42707757-42704154 | 20130731	2.5	-1	1	19	105	123	AAAGGAUUGAACUGGUCAA	::::.:::::::::. :::	UUGAUCAGUUCAAUUGUUU	Cleavage	1
Cluster_1159	UAUACUGAACGUGAUUACUGAACA	24	Medtr8g069505.7	| copper amine oxidase, enzyme domain protein | HC | chr8:29135429-29141868 | 20130731	2.5	-1	1	24	1360	1383	UAUACUGAACGUGAUUACUGAACA	::::.::::::::::::	AAGUGGUUAAUUACGUUCAGUAUA	Cleavage	1
Cluster_1170	UACCAUUAGAUUCGUCGCAUUAAGA	25	Medtr4g102810.1	| Ara4-interacting protein | HC | chr4:42612859-42608514 | 20130731	2.5	-1	1	25	1711	1735	UACCAUUAGAUUCGUCGCAUUAAGA	::::: ..::::::.::::::	UGACAAUGCUGUGAAUCUGAUGGUA	Cleavage	1
Cluster_1170	UACCAUUAGAUUCGUCGCAUUAAGA	25	Medtr1g081660.1	| benzyl alcohol O-benzoyltransferase | HC | chr1:36306738-36310564 | 20130731	2.5	-1	1	25	1188	1212	UACCAUUAGAUUCGUCGCAUUAAGA	::.:.::.::.:::::::.	GCAUUCUGUGGCGGAUUUAAUGGUG	Cleavage	1
Cluster_1170	UACCAUUAGAUUCGUCGCAUUAAGA	25	Medtr7g081340.1	| transmembrane protein, putative | LC | chr7:31039524-31039214 | 20130731	2.5	-1	1	25	50	74	UACCAUUAGAUUCGUCGCAUUAAGA	:::::.:.::::..::::.	UGAUUUUGCGAUGGAUCUGGUGGUG	Cleavage	1
Cluster_1178	UCUUGGCAUCGUUGGUCGUAAAGG	24	Medtr3g110417.1	| TPR repeat protein | HC | chr3:51615604-51628442 | 20130731	2.5	-1	1	24	5687	5710	UCUUGGCAUCGUUGGUCGUAAAGG	: ::: ::.::::::::..:::	AAUGUACAACUAACGAUGCUGAGA	Cleavage	1
Cluster_1178	UCUUGGCAUCGUUGGUCGUAAAGG	24	Medtr3g110417.2	| TPR repeat protein | HC | chr3:51615368-51628691 | 20130731	2.5	-1	1	24	6037	6060	UCUUGGCAUCGUUGGUCGUAAAGG	: ::: ::.::::::::..:::	AAUGUACAACUAACGAUGCUGAGA	Cleavage	1
Cluster_1183	UUGAUGUAAAACUUUAACUUGGCC	24	Medtr8g465890.2	| PPR containing plant protein | HC | chr8:23498212-23503209 | 20130731	2.5	-1	1	24	365	388	UUGAUGUAAAACUUUAACUUGGCC	:..::::: :::::: ::::::	UUCUGAGUUACAGUUUUUCAUCAA	Cleavage	1
Cluster_1183	UUGAUGUAAAACUUUAACUUGGCC	24	Medtr8g465890.1	| PPR containing plant protein | HC | chr8:23498318-23503190 | 20130731	2.5	-1	1	24	259	282	UUGAUGUAAAACUUUAACUUGGCC	:..::::: :::::: ::::::	UUCUGAGUUACAGUUUUUCAUCAA	Cleavage	1
Cluster_1184	UAAUCAUUUCAAGGCACUG	19	Medtr0019s0310.1	| methyl-CpG-binding domain protein | HC | scaffold0019:176904-175463 | 20130731	2.5	-1	1	19	413	431	UAAUCAUUUCAAGGCACUG	::::::.: ::.:::::::	CAGUGCUUAGAGAUGAUUA	Translation	1
Cluster_1184	UAAUCAUUUCAAGGCACUG	19	Medtr6g055750.1	| methyl-CpG-binding domain protein | HC | chr6:19999785-19998456 | 20130731	2.5	-1	1	19	284	302	UAAUCAUUUCAAGGCACUG	::::::.: ::.:::::::	CAGUGCUUAGAGAUGAUUA	Translation	1
Cluster_1184	UAAUCAUUUCAAGGCACUG	19	Medtr3g107280.1	| EIN3-binding F-box-like protein | HC | chr3:49486587-49482963 | 20130731	2.5	-1	1	19	1755	1773	UAAUCAUUUCAAGGCACUG	:::::.:::::: :::::.	CAGUGUCUUGAAUUGAUUG	Cleavage	1
Cluster_1185	AGGAUUAAAGUUAAGUAGGUUUGCU	25	Medtr6g013485.2	| plant calmodulin-binding-like protein | HC | chr6:4342550-4346855 | 20130731	2.5	-1	1	25	2431	2455	AGGAUUAAAGUUAAGUAGGUUUGCU	: :.:::::::::: ::::.:	ACUUAUCUUACUUAACUUGAAUCUU	Cleavage	1
Cluster_1185	AGGAUUAAAGUUAAGUAGGUUUGCU	25	Medtr6g013485.1	| plant calmodulin-binding-like protein | HC | chr6:4342499-4346885 | 20130731	2.5	-1	1	25	2384	2408	AGGAUUAAAGUUAAGUAGGUUUGCU	: :.:::::::::: ::::.:	ACUUAUCUUACUUAACUUGAAUCUU	Cleavage	1
Cluster_1185	AGGAUUAAAGUUAAGUAGGUUUGCU	25	Medtr3g112190.1	| AP-4 complex subunit mu-1 | HC | chr3:52543098-52538217 | 20130731	2.5	-1	1	25	1512	1536	AGGAUUAAAGUUAAGUAGGUUUGCU	:::: ::.:::::::::::..:	UUAAAACAUAUUUAACUUUAAUUUU	Cleavage	1
Cluster_1186	ACAGAGUGACUUUCUUUCUUUCA	23	Medtr3g092840.1	| transparent testa glabra protein | HC | chr3:42443433-42441118 | 20130731	2.5	-1	1	23	2266	2288	ACAGAGUGACUUUCUUUCUUUCA	:::::::.:::::::::	GAGUUGAAAGAAGGUCACUCUGC	Cleavage	1
Cluster_1186	ACAGAGUGACUUUCUUUCUUUCA	23	Medtr1g063370.1	| membrane magnesium transporter | HC | chr1:27971291-27967384 | 20130731	2.5	-1	1	23	635	657	ACAGAGUGACUUUCUUUCUUUCA	.::..:::::::.:.:.:::	UAUGAGGGAGAAAGUUAUUUUGU	Cleavage	1
Cluster_1186	ACAGAGUGACUUUCUUUCUUUCA	23	Medtr8g072310.1	| nucleotide-diphospho-sugar transferase family protein | HC | chr8:30559055-30566150 | 20130731	2.5	-1	1	23	812	834	ACAGAGUGACUUUCUUUCUUUCA	:..:::.: :::::.:.:::::	GGGGAGAGAAAAAGUUAUUCUGU	Cleavage	1
Cluster_1186	ACAGAGUGACUUUCUUUCUUUCA	23	Medtr5g085330.1	| 1-aminocyclopropane-1-carboxylate oxidase | HC | chr5:36872929-36870742 | 20130731	2.5	-1	1	23	82	104	ACAGAGUGACUUUCUUUCUUUCA	:::::::.:::.:::.::	AAUUAGAAAGAGAGUUACUUUGA	Cleavage	1
Cluster_1187	UAAGAUUUGUAGGCGCGUUCCGC	23	Medtr7g102810.1	| cytosine/purine uracil thiamine allantoin permease | HC | chr7:41612507-41610402 | 20130731	2.5	-1	1	23	1315	1337	UAAGAUUUGUAGGCGCGUUCCGC	::::: :.:..::::::::	UGCAAACGCUCUUGUAAAUCUUA	Cleavage	1
Cluster_1187	UAAGAUUUGUAGGCGCGUUCCGC	23	Medtr8g467140.1	| F-box protein interaction domain protein | LC | chr8:24042673-24041678 | 20130731	2.5	-1	1	23	154	176	UAAGAUUUGUAGGCGCGUUCCGC	::.:::.::..:::::::.	UUUAAAUGCGUCUGUAAAUCUUG	Cleavage	1
Cluster_1188	UUAUAUGUCUUGGCUCAUCUG	21	Medtr7g060370.1	| DUF247 domain protein | LC | chr7:21808390-21803496 | 20130731	2.5	-1	1	21	434	454	UUAUAUGUCUUGGCUCAUCUG	:::::::::.:.:::.:..	UUGAUGAGCCAGGGCAUGUGG	Cleavage	1
Cluster_1193	UGAGGUUGAACUUGAGGCAUGG	22	Medtr4g037575.1	| hypothetical protein | HC | chr4:13826788-13833833 | 20130731	2.5	-1	1	22	1296	1317	UGAGGUUGAACUUGAGGCAUGG	:::::::::::.:::::	CUUACCCUCAAGUUCAGCCUCA	Cleavage	1
Cluster_1193	UGAGGUUGAACUUGAGGCAUGG	22	Medtr3g086970.1	| hypothetical protein | LC | chr3:39428837-39428265 | 20130731	2.5	-1	1	22	85	106	UGAGGUUGAACUUGAGGCAUGG	: :::::: ::::::::::	AACUACCUCAACUUCAACCUCA	Translation	1
Cluster_1193	UGAGGUUGAACUUGAGGCAUGG	22	Medtr2g426090.1	| F-box and associated interaction domain protein | LC | chr2:9329745-9326169 | 20130731	2.5	-1	1	22	329	350	UGAGGUUGAACUUGAGGCAUGG	: :::::: ::::::::::	AAUUCCCUCAAUUUCAACCUCA	Translation	1
Cluster_1193	UGAGGUUGAACUUGAGGCAUGG	22	Medtr4g124900.1	| auxin response factor 2 | HC | chr4:51795315-51802487 | 20130731	2.5	-1	1	22	1925	1946	UGAGGUUGAACUUGAGGCAUGG	::::::::::::::..::.	GGAUGCCUCAAGUUCAGUCUUC	Cleavage	1
Cluster_1193	UGAGGUUGAACUUGAGGCAUGG	22	Medtr7g022960.1	| zinc finger-like protein, putative | LC | chr7:7484809-7483943 | 20130731	2.5	-1	1	22	723	744	UGAGGUUGAACUUGAGGCAUGG	:::: ::::::::: ::::	UACUGCCACAAGUUCAAGCUCA	Cleavage	1
Cluster_1193	UGAGGUUGAACUUGAGGCAUGG	22	Medtr3g087030.2	| molecular chaperone Hsp40/DnaJ family protein | HC | chr3:39462154-39456572 | 20130731	2.5	-1	1	22	461	482	UGAGGUUGAACUUGAGGCAUGG	:::: ::::::::::::.	GGCUGCCCCAAGUUCAACCUUU	Cleavage	1
Cluster_1193	UGAGGUUGAACUUGAGGCAUGG	22	Medtr3g087030.1	| molecular chaperone Hsp40/DnaJ family protein | HC | chr3:39461674-39456581 | 20130731	2.5	-1	1	22	227	248	UGAGGUUGAACUUGAGGCAUGG	:::: ::::::::::::.	GGCUGCCCCAAGUUCAACCUUU	Cleavage	1
Cluster_1193	UGAGGUUGAACUUGAGGCAUGG	22	Medtr3g065700.1	| hypothetical protein | HC | chr3:29684619-29685533 | 20130731	2.5	-1	1	22	513	534	UGAGGUUGAACUUGAGGCAUGG	: ::::::::::::..::.	UGUUUCCUCAAGUUCAAUUUCG	Cleavage	1
Cluster_1193	UGAGGUUGAACUUGAGGCAUGG	22	Medtr7g110720.1	| WRKY1b transcription factor | HC | chr7:45376831-45373558 | 20130731	2.5	-1	1	22	956	978	UGAGGUUGAACUUGA-GGCAUGG	:::. :::::::::::::::	UGCUGCUAUCAAGUUCAACCUCA	Cleavage	1
Cluster_1193	UGAGGUUGAACUUGAGGCAUGG	22	Medtr4g037575.2	| hypothetical protein | HC | chr4:13826774-13831852 | 20130731	2.5	-1	1	22	1310	1331	UGAGGUUGAACUUGAGGCAUGG	:::::::::::.:::::	CUUACCCUCAAGUUCAGCCUCA	Cleavage	1
Cluster_1193	UGAGGUUGAACUUGAGGCAUGG	22	Medtr4g134920.1	| hypothetical protein | HC | chr4:56549447-56550581 | 20130731	2.5	-1	1	22	343	364	UGAGGUUGAACUUGAGGCAUGG	:::.:::::::::.:: ::	GUCUGCUUCAAGUUCAGCCACA	Cleavage	1
Cluster_1193	UGAGGUUGAACUUGAGGCAUGG	22	Medtr4g124900.2	| auxin response factor 2 | HC | chr4:51795315-51802487 | 20130731	2.5	-1	1	22	1925	1946	UGAGGUUGAACUUGAGGCAUGG	::::::::::::::..::.	GGAUGCCUCAAGUUCAGUCUUC	Cleavage	1
Cluster_1193	UGAGGUUGAACUUGAGGCAUGG	22	Medtr2g090250.1	| lectin receptor kinase | HC | chr2:38351961-38354290 | 20130731	2.5	-1	1	22	2019	2040	UGAGGUUGAACUUGAGGCAUGG	.:: :::::::::::..:.:	AAGUGGCUCAAGUUCAAUUUUA	Cleavage	1
Cluster_1193	UGAGGUUGAACUUGAGGCAUGG	22	Medtr2g031720.1	| F-box protein interaction domain protein | LC | chr2:12017948-12020188 | 20130731	2.5	-1	1	22	298	319	UGAGGUUGAACUUGAGGCAUGG	.::: :::::: ::::::::::	UCAUCCCUCAAUUUCAACCUCA	Translation	1
Cluster_1193	UGAGGUUGAACUUGAGGCAUGG	22	Medtr7g110720.2	| WRKY1b transcription factor | HC | chr7:45376831-45373558 | 20130731	2.5	-1	1	22	875	897	UGAGGUUGAACUUGA-GGCAUGG	:::. :::::::::::::::	UGCUGCUAUCAAGUUCAACCUCA	Cleavage	1
Cluster_1193	UGAGGUUGAACUUGAGGCAUGG	22	Medtr1g074370.1	| ethylene-responsive transcription factor 1B | HC | chr1:33042222-33043578 | 20130731	2.5	-1	1	22	91	112	UGAGGUUGAACUUGAGGCAUGG	: .:::::::::::::::	AAUGGAUUCAAGUUCAACCUCA	Cleavage	1
Cluster_1194	AGAGGACUCAUGAAUCAAUUCG	22	Medtr2g093740.6	| auxin response factor-like protein | HC | chr2:39984806-39979874 | 20130731	2.5	-1	1	22	200	221	AGAGGACUCAUGAAUCAAUUCG	:::::::::: ::::.:.:	AUCAUUGAUUCAUUAGUCUUUU	Cleavage	1
Cluster_1194	AGAGGACUCAUGAAUCAAUUCG	22	Medtr2g093740.1	| auxin response factor-like protein | HC | chr2:39984806-39979874 | 20130731	2.5	-1	1	22	200	221	AGAGGACUCAUGAAUCAAUUCG	:::::::::: ::::.:.:	AUCAUUGAUUCAUUAGUCUUUU	Cleavage	1
Cluster_1194	AGAGGACUCAUGAAUCAAUUCG	22	Medtr2g093740.4	| auxin response factor-like protein | HC | chr2:39984806-39979874 | 20130731	2.5	-1	1	22	200	221	AGAGGACUCAUGAAUCAAUUCG	:::::::::: ::::.:.:	AUCAUUGAUUCAUUAGUCUUUU	Cleavage	1
Cluster_1194	AGAGGACUCAUGAAUCAAUUCG	22	Medtr8g027130.1	| hypothetical protein | LC | chr8:9482572-9483210 | 20130731	2.5	-1	1	22	107	128	AGAGGACUCAUGAAUCAAUUCG	::: :.::.:::.:::::::	GCAAUGGGUUUAUGGGUCCUCU	Cleavage	1
Cluster_1194	AGAGGACUCAUGAAUCAAUUCG	22	Medtr2g088110.1	| hypothetical protein | LC | chr2:37106377-37105907 | 20130731	2.5	-1	1	22	106	127	AGAGGACUCAUGAAUCAAUUCG	::: :.::.:::.:::::::	GAAAUGGGUUUAUGGGUCCUCU	Cleavage	1
Cluster_1194	AGAGGACUCAUGAAUCAAUUCG	22	Medtr2g086060.1	| hypothetical protein | LC | chr2:36178221-36178953 | 20130731	2.5	-1	1	22	459	480	AGAGGACUCAUGAAUCAAUUCG	::: :.::.:::.:::::::	GCAAUGGGUUUAUGGGUCCUCU	Cleavage	1
Cluster_1194	AGAGGACUCAUGAAUCAAUUCG	22	Medtr2g093740.10	| auxin response factor-like protein | HC | chr2:39984806-39979874 | 20130731	2.5	-1	1	22	200	221	AGAGGACUCAUGAAUCAAUUCG	:::::::::: ::::.:.:	AUCAUUGAUUCAUUAGUCUUUU	Cleavage	1
Cluster_1194	AGAGGACUCAUGAAUCAAUUCG	22	Medtr2g093740.5	| auxin response factor-like protein | HC | chr2:39984806-39979874 | 20130731	2.5	-1	1	22	200	221	AGAGGACUCAUGAAUCAAUUCG	:::::::::: ::::.:.:	AUCAUUGAUUCAUUAGUCUUUU	Cleavage	1
Cluster_1194	AGAGGACUCAUGAAUCAAUUCG	22	Medtr2g093740.9	| auxin response factor-like protein | HC | chr2:39984806-39979874 | 20130731	2.5	-1	1	22	200	221	AGAGGACUCAUGAAUCAAUUCG	:::::::::: ::::.:.:	AUCAUUGAUUCAUUAGUCUUUU	Cleavage	1
Cluster_1194	AGAGGACUCAUGAAUCAAUUCG	22	Medtr2g093740.3	| auxin response factor-like protein | HC | chr2:39984806-39979874 | 20130731	2.5	-1	1	22	200	221	AGAGGACUCAUGAAUCAAUUCG	:::::::::: ::::.:.:	AUCAUUGAUUCAUUAGUCUUUU	Cleavage	1
Cluster_1194	AGAGGACUCAUGAAUCAAUUCG	22	Medtr5g065410.1	| transmembrane protein, putative | LC | chr5:27498823-27502235 | 20130731	2.5	-1	1	22	166	187	AGAGGACUCAUGAAUCAAUUCG	::: :.::.:::.:::::::	GCAAUAGGUUUAUGGGUCCUCU	Cleavage	1
Cluster_1194	AGAGGACUCAUGAAUCAAUUCG	22	Medtr6g008670.1	| hypothetical protein | LC | chr6:2377835-2377605 | 20130731	2.5	-1	1	19	1	19	AGAGGACUCAUGAAUCAAU	:: :.::.:::.:::::::	AUGGGUUUAUGGGUCCUCU	Cleavage	1
Cluster_1194	AGAGGACUCAUGAAUCAAUUCG	22	Medtr3g074730.1	| plant organelle RNA recognition domain protein | HC | chr3:33769164-33767587 | 20130731	2.5	-1	1	22	912	933	AGAGGACUCAUGAAUCAAUUCG	.:.::::::::::::::..:.	UGGAUUGAUUCAUGAGUUUUUG	Cleavage	1
Cluster_1194	AGAGGACUCAUGAAUCAAUUCG	22	Medtr6g045177.1	| hypothetical protein | LC | chr6:16108144-16107848 | 20130731	2.5	-1	1	19	1	19	AGAGGACUCAUGAAUCAAU	:: :.::.:::.:::::::	AUGGGUUUAUGGGUCCUCU	Cleavage	1
Cluster_1194	AGAGGACUCAUGAAUCAAUUCG	22	Medtr0734s0020.1	| hypothetical protein | LC | scaffold0734:5858-5382 | 20130731	2.5	-1	1	19	1	19	AGAGGACUCAUGAAUCAAU	:: :.::.:::.:::::::	AUGGGUUUAUGGGUCCUCU	Cleavage	1
Cluster_1194	AGAGGACUCAUGAAUCAAUUCG	22	Medtr2g438430.1	| transmembrane protein, putative | LC | chr2:15509885-15511634 | 20130731	2.5	-1	1	22	298	319	AGAGGACUCAUGAAUCAAUUCG	::: :.::.:::.:::::::	ACAAUGGGUUUAUGGGUCCUCU	Cleavage	1
Cluster_1194	AGAGGACUCAUGAAUCAAUUCG	22	Medtr7g103580.1	| hypothetical protein | LC | chr7:41909409-41912302 | 20130731	2.5	-1	1	22	184	205	AGAGGACUCAUGAAUCAAUUCG	: ::: :.::.:::.:::::::	CCAAUGGGUUUAUGGGUCCUCU	Cleavage	1
Cluster_1194	AGAGGACUCAUGAAUCAAUUCG	22	Medtr2g093740.2	| auxin response factor-like protein | HC | chr2:39984806-39979874 | 20130731	2.5	-1	1	22	200	221	AGAGGACUCAUGAAUCAAUUCG	:::::::::: ::::.:.:	AUCAUUGAUUCAUUAGUCUUUU	Cleavage	1
Cluster_1194	AGAGGACUCAUGAAUCAAUUCG	22	Medtr2g016810.1	| hypothetical protein | LC | chr2:5211013-5211210 | 20130731	2.5	-1	1	22	139	160	AGAGGACUCAUGAAUCAAUUCG	.::: :::::::.::..:::	AAGAUUCAUUCAUGGGUUUUCU	Cleavage	1
Cluster_1195	UUUCCCGUCAUCCUUAAAUUGGACG	25	Medtr1g083600.2	| TPR repeat protein | HC | chr1:37194952-37197248 | 20130731	2.5	-1	1	25	597	621	UUUCCCGUCAUCCUUAAAUUGGACG	.::::::::::.::::.:	UAACAUGUUUAAGGAUGGCGGGGAU	Cleavage	1
Cluster_1195	UUUCCCGUCAUCCUUAAAUUGGACG	25	Medtr1g083600.1	| TPR repeat protein | HC | chr1:37194952-37197889 | 20130731	2.5	-1	1	25	597	621	UUUCCCGUCAUCCUUAAAUUGGACG	.::::::::::.::::.:	UAACAUGUUUAAGGAUGGCGGGGAU	Cleavage	1
Cluster_1195	UUUCCCGUCAUCCUUAAAUUGGACG	25	Medtr4g104790.1	| PPR containing plant protein | LC | chr4:43421559-43424066 | 20130731	2.5	-1	1	25	474	498	UUUCCCGUCAUCCUUAAAUUGGACG	: .. ::::::::::::.: :.::	GGAUUCAUUUAAGGAUGAUGAGGAA	Cleavage	1
Cluster_1195	UUUCCCGUCAUCCUUAAAUUGGACG	25	Medtr5g087390.1	| indole-3-acetaldehyde oxidase | HC | chr5:37865280-37857588 | 20130731	2.5	-1	1	25	2667	2691	UUUCCCGUCAUCCUUAAAUUGGACG	.::: ..:::::: ::::.::::::	UGUCGGGUUUAAGAAUGAUGGGAAA	Cleavage	1
Cluster_1197	UCCAAGGAUUUAUAGAACACCU	22	Medtr1g039220.1	| LRR receptor-like kinase family protein | LC | chr1:14534940-14531361 | 20130731	2.5	-1	1	22	2780	2801	UCCAAGGAUUUAUAGAACACCU	:: :.:::.:::.::::::	UUUUGGUUUAUGAAUUCUUGGA	Cleavage	1
Cluster_1197	UCCAAGGAUUUAUAGAACACCU	22	Medtr1g040555.1	| LRR receptor-like kinase family protein | LC | chr1:15015707-15018266 | 20130731	2.5	-1	1	22	2105	2126	UCCAAGGAUUUAUAGAACACCU	:: :.:::.:::.::::::	UUUUGGUUUAUGAAUUCUUGGA	Cleavage	1
Cluster_1197	UCCAAGGAUUUAUAGAACACCU	22	Medtr1g039240.1	| LRR receptor-like kinase family protein | LC | chr1:14524897-14521261 | 20130731	2.5	-1	1	22	2858	2879	UCCAAGGAUUUAUAGAACACCU	:: :.:::.:::.::::::	UUUUGGUUUAUGAAUUCUUGGA	Cleavage	1
Cluster_1197	UCCAAGGAUUUAUAGAACACCU	22	Medtr1g040545.1	| LRR receptor-like kinase family protein | LC | chr1:15009292-15012620 | 20130731	2.5	-1	1	22	2405	2426	UCCAAGGAUUUAUAGAACACCU	:: :.:::.:::.::::::	UUUUGGUUUAUGAAUUCUUGGA	Cleavage	1
Cluster_1197	UCCAAGGAUUUAUAGAACACCU	22	Medtr7g081720.1	| LRR receptor-like kinase | LC | chr7:31213447-31217402 | 20130731	2.5	-1	1	22	2671	2692	UCCAAGGAUUUAUAGAACACCU	:: :.:::::.:.::::::	UUUUGGUUUAUAAGUUCUUGGA	Cleavage	1
Cluster_1197	UCCAAGGAUUUAUAGAACACCU	22	Medtr1g040615.1	| LRR receptor-like kinase family protein | LC | chr1:15030390-15038494 | 20130731	2.5	-1	1	22	2759	2780	UCCAAGGAUUUAUAGAACACCU	:: :.:::.:::.::::::	UUUUGGUUUAUGAAUUCUUGGA	Cleavage	1
Cluster_1198	UAAAUUGAACAUCGGAUCAACUGA	24	Medtr7g045860.1	| LRR receptor-like kinase family protein | LC | chr7:16170530-16174220 | 20130731	2.5	-1	1	24	2105	2128	UAAAUUGAACAUCGGAUCAACUGA	: :::: ::::::::.::::	AGCUUCGAUCAGAUGUUCAGUUUA	Cleavage	1
Cluster_1199	UAGUGAAUGAUCUUGGACU	19	Medtr4g115530.2	| glycosyltransferase | HC | chr4:47726607-47725488 | 20130731	2.5	-1	1	19	185	203	UAGUGAAUGAUCUUGGACU	:::.:::.::::::.:::	UGUCUAAGGUCAUUCGCUA	Cleavage	1
Cluster_1199	UAGUGAAUGAUCUUGGACU	19	Medtr4g115530.3	| glycosyltransferase | HC | chr4:47726861-47725488 | 20130731	2.5	-1	1	19	347	365	UAGUGAAUGAUCUUGGACU	:::.:::.::::::.:::	UGUCUAAGGUCAUUCGCUA	Cleavage	1
Cluster_1199	UAGUGAAUGAUCUUGGACU	19	Medtr7g111860.1	| stem-loop-binding protein of 41 kDa protein B | HC | chr7:45955304-45952399 | 20130731	2.5	-1	1	19	925	943	UAGUGAAUGAUCUUGGACU	:: : .:::::::::::::	AGCCAGAGAUCAUUCACUA	Cleavage	1
Cluster_1199	UAGUGAAUGAUCUUGGACU	19	Medtr4g115530.1	| glycosyltransferase | HC | chr4:47726861-47725488 | 20130731	2.5	-1	1	19	347	365	UAGUGAAUGAUCUUGGACU	:::.:::.::::::.:::	UGUCUAAGGUCAUUCGCUA	Cleavage	1
Cluster_1199	UAGUGAAUGAUCUUGGACU	19	Medtr4g115530.4	| glycosyltransferase | HC | chr4:47726607-47725488 | 20130731	2.5	-1	1	19	185	203	UAGUGAAUGAUCUUGGACU	:::.:::.::::::.:::	UGUCUAAGGUCAUUCGCUA	Cleavage	1
Cluster_1199	UAGUGAAUGAUCUUGGACU	19	Medtr3g082700.1	| high affinity inorganic phosphate transporter | HC | chr3:37316399-37314116 | 20130731	2.5	-1	1	19	2055	2073	UAGUGAAUGAUCUUGGACU	: ::::: :::::::::::	AAUCCAAUAUCAUUCACUA	Cleavage	1
Cluster_1199	UAGUGAAUGAUCUUGGACU	19	Medtr4g117960.1	| UDP-glucosyltransferase family protein | LC | chr4:48959432-48957547 | 20130731	2.5	-1	1	19	622	640	UAGUGAAUGAUCUUGGACU	::::::.: :::::::::.	AGUCCAGGUUCAUUCACUG	Translation	1
Cluster_1200	UGAGGUACGAACUUUUAACAUGUU	24	Medtr5g064530.1	| leguminosin group485 secreted peptide | HC | chr5:27102666-27103515 | 20130731	2.5	-1	1	24	623	646	UGAGGUACGAACUUUUAACAUGUU	.::: :::::::.:::..:::	AUGGUGUGAAAAGUUUGUAUUUCA	Cleavage	1
Cluster_1200	UGAGGUACGAACUUUUAACAUGUU	24	Medtr4g076030.2	| Uro-adherence factor A, putative | HC | chr4:29074837-29068419 | 20130731	2.5	-1	1	24	2327	2350	UGAGGUACGAACUUUUAACAUGUU	::: :::::::: ::::::	GAAUCGUUUAAAGUUCGAACCUCA	Cleavage	1
Cluster_1200	UGAGGUACGAACUUUUAACAUGUU	24	Medtr4g076030.1	| Uro-adherence factor A, putative | HC | chr4:29076152-29068419 | 20130731	2.5	-1	1	24	2102	2125	UGAGGUACGAACUUUUAACAUGUU	::: :::::::: ::::::	GAAUCGUUUAAAGUUCGAACCUCA	Cleavage	1
Cluster_1209	UACCAAGUGACUAGAAAACUGCC	23	Medtr2g022860.1	| membrane-associated salt-inducible protein | HC | chr2:7962191-7960482 | 20130731	2.5	-1	1	23	1328	1350	UACCAAGUGACUAGAAAACUGCC	::::.:.::::.::::::	GUGUAUUUUUUGGUCAUUUGGUA	Cleavage	1
Cluster_1211	CAAAAGAGAAUCAGACAUGAAC	22	Medtr5g008810.3	| cycloartenol synthase | HC | chr5:1944482-1932210 | 20130731	2.5	-1	1	22	974	995	CAAAAGAGAAUCAGACAUGAAC	:::::.::.:::: :::::	CACCAUGUUUGGUUCUGUUUUG	Cleavage	1
Cluster_1211	CAAAAGAGAAUCAGACAUGAAC	22	Medtr5g075060.1	| CBL-interacting kinase | HC | chr5:31890331-31893777 | 20130731	2.5	-1	1	22	264	285	CAAAAGAGAAUCAGACAUGAAC	:..:: ::::::.:::::::	UGUUGUGCCUGAUUUUCUUUUG	Cleavage	1
Cluster_1211	CAAAAGAGAAUCAGACAUGAAC	22	Medtr5g008810.2	| cycloartenol synthase | HC | chr5:1944482-1932210 | 20130731	2.5	-1	1	22	830	851	CAAAAGAGAAUCAGACAUGAAC	:::::.::.:::: :::::	CACCAUGUUUGGUUCUGUUUUG	Cleavage	1
Cluster_1211	CAAAAGAGAAUCAGACAUGAAC	22	Medtr5g008810.1	| cycloartenol synthase | HC | chr5:1944453-1932210 | 20130731	2.5	-1	1	22	811	832	CAAAAGAGAAUCAGACAUGAAC	:::::.::.:::: :::::	CACCAUGUUUGGUUCUGUUUUG	Cleavage	1
Cluster_1211	CAAAAGAGAAUCAGACAUGAAC	22	Medtr3g086740.1	| DUF617 family protein | HC | chr3:39307419-39308418 | 20130731	2.5	-1	1	22	930	951	CAAAAGAGAAUCAGACAUGAAC	::::::::::::.:.: :::	AGUCAUGUCUGAUUUUUUGUUG	Cleavage	1
Cluster_1211	CAAAAGAGAAUCAGACAUGAAC	22	Medtr3g433510.1	| hypothetical protein | LC | chr3:10720513-10721565 | 20130731	2.5	-1	1	22	769	790	CAAAAGAGAAUCAGACAUGAAC	::: :.:::::.:.:::::	UGACAUAUUUGAUUUUUUUUUG	Cleavage	1
Cluster_1212	UAAAUGAUCAGCGAGGAUUUGC	22	Medtr6g088140.1	| cycloartenol synthase | HC | chr6:33337004-33344196 | 20130731	2.5	-1	1	22	2486	2507	UAAAUGAUCAGCGAGGAUUUGC	::::::::.::.:.::::	AGUAAUCCUCGUUGGUUAUUUC	Cleavage	1
Cluster_1212	UAAAUGAUCAGCGAGGAUUUGC	22	Medtr5g063440.1	| hypothetical protein | LC | chr5:26302752-26303069 | 20130731	2.5	-1	1	22	273	294	UAAAUGAUCAGCGAGGAUUUGC	:.::.::.::::::.::::.	UGAGAUUCUUGCUGAUUAUUUG	Cleavage	1
Cluster_1213	GAGGACAUAUGAAAAGUUAAUC	22	Medtr1g022025.1	| nucleotide-diphospho-sugar transferase family protein | HC | chr1:6775724-6772802 | 20130731	2.5	-1	1	22	1747	1768	GAGGACAUAUGAAAAGUUAAUC	:::::::: .:::::::.::	UUUUAACUUUGUAUAUGUCUUC	Cleavage	1
Cluster_1213	GAGGACAUAUGAAAAGUUAAUC	22	Medtr2g010540.1	| transmembrane protein, putative | HC | chr2:2435717-2441607 | 20130731	2.5	-1	1	22	1287	1308	GAGGACAUAUGAAAAGUUAAUC	::..:::::::::::..:.	UGAUAGUUUUUCAUAUGUUUUU	Cleavage	1
Cluster_1213	GAGGACAUAUGAAAAGUUAAUC	22	Medtr3g464820.1	| hypothetical protein | LC | chr3:26131930-26131389 | 20130731	2.5	-1	1	22	21	42	GAGGACAUAUGAAAAGUUAAUC	:::::: ::::: :::::::	UCUUAACUAUUCAUUUGUCCUC	Cleavage	1
Cluster_1213	GAGGACAUAUGAAAAGUUAAUC	22	Medtr8g012905.1	| hypothetical protein | LC | chr8:3912854-3913599 | 20130731	2.5	-1	1	20	1	20	GAGGACAUAUGAAAAGUUAA	:..::::::::::::: ::	AUGGCUUUUCAUAUGUCAUC	Cleavage	1
Cluster_1219	AUCCUGGCGAAUUAUUGAAUCCG	23	Medtr8g088970.1	| receptor-like protein, putative | LC | chr8:36966934-36964118 | 20130731	2.5	-1	1	23	1590	1612	AUCCUGGCGAAUUAUUGAAUCCG	::.:::::::.:.:::::	AUCUUUUAAUAAUUUGUCAGGAG	Cleavage	1
Cluster_1219	AUCCUGGCGAAUUAUUGAAUCCG	23	Medtr4g018970.1	| leucine-rich receptor-like kinase family protein | LC | chr4:5866383-5869199 | 20130731	2.5	-1	1	23	1605	1627	AUCCUGGCGAAUUAUUGAAUCCG	::.:::::::.:.:::::	AUCUUUUAAUAAUUUGUCAGGAG	Cleavage	1
Cluster_122	GGAAGAACAUCUCGGAUAUGAAA	23	Medtr3g462570.1	| IBR domain protein | LC | chr3:25014064-25018785 | 20130731	2.5	-1	1	23	1508	1530	GGAAGAACAUCUCGGAUAUGAAA	::.::::::::::::: .:	AGAAAUGUCCGAGAUGUUCUAUC	Cleavage	1
Cluster_123	UAGUGAACUUUUGAAACUUGGCUC	24	Medtr8g009950.1	| signal transducer, putative | HC | chr8:2484063-2477792 | 20130731	2.5	-1	1	24	722	745	UAGUGAACUUUUGAAACUUGGCUC	.:..::::::. :.:::::::::	AGGUUAAGUUUUCAGAGUUCACUA	Cleavage	1
Cluster_123	UAGUGAACUUUUGAAACUUGGCUC	24	Medtr6g088715.1	| DNA (cytosine-5)-methyltransferase CMT3-like protein | HC | chr6:33856882-33847397 | 20130731	2.5	-1	1	24	2320	2343	UAGUGAACUUUUGAAACUUGGCUC	::.:::: ::::::::.:.::	UGACCGAGUUCCAAAAGUUUAUUA	Cleavage	1
Cluster_123	UAGUGAACUUUUGAAACUUGGCUC	24	Medtr2g079800.1	| synapsis 1-like protein, putative | HC | chr2:33634232-33630997 | 20130731	2.5	-1	1	24	387	410	UAGUGAACUUUUGAAACUUGGCUC	::: :.:: ::::::::::..:::	GAGGCGAGAUUCAAAAGUUUGCUA	Cleavage	1
Cluster_123	UAGUGAACUUUUGAAACUUGGCUC	24	Medtr8g468500.1	| LRR receptor-like kinase | HC | chr8:24824387-24829206 | 20130731	2.5	-1	1	24	2620	2643	UAGUGAACUUUUGAAACUUGGCUC	... ::::::::::::::.:.	UGAUUGUGUUUCAAAAGUUCAUUG	Cleavage	1
Cluster_123	UAGUGAACUUUUGAAACUUGGCUC	24	Medtr4g024200.1	| F-box/RNI superfamily protein | LC | chr4:8186005-8187423 | 20130731	2.5	-1	1	24	209	232	UAGUGAACUUUUGAAACUUGGCUC	:.: :::::::.:::.::::	GUCGCGAUUUUCAAAGGUUUACUA	Cleavage	1
Cluster_123	UAGUGAACUUUUGAAACUUGGCUC	24	Medtr1g024980.1	| C2H2-like zinc finger protein | HC | chr1:7957883-7961646 | 20130731	2.5	-1	1	24	349	372	UAGUGAACUUUUGAAACUUGGCUC	:: : :::::::::.::::::. :	GAUCGAAGUUUCAAGAGUUCAUGA	Cleavage	1
Cluster_123	UAGUGAACUUUUGAAACUUGGCUC	24	Medtr2g105060.2	| WRKY family transcription factor | HC | chr2:45307078-45308351 | 20130731	2.5	-1	1	24	412	435	UAGUGAACUUUUGAAACUUGGCUC	:. . :::::::::.::::.:.:	GGCUAAAGUUUCAAGAGUUUAUUU	Cleavage	1
Cluster_123	UAGUGAACUUUUGAAACUUGGCUC	24	Medtr7g022230.1	| BZIP transcription factor | HC | chr7:7140454-7129318 | 20130731	2.5	-1	1	24	153	176	UAGUGAACUUUUGAAACUUGGCUC	.: :::::::.:.:::::::.	UCCUCUAGUUUCAGAGGUUCACUG	Cleavage	1
Cluster_123	UAGUGAACUUUUGAAACUUGGCUC	24	Medtr2g105060.1	| WRKY family transcription factor | HC | chr2:45306754-45308359 | 20130731	2.5	-1	1	24	633	656	UAGUGAACUUUUGAAACUUGGCUC	:. . :::::::::.::::.:.:	GGCUAAAGUUUCAAGAGUUUAUUU	Cleavage	1
Cluster_123	UAGUGAACUUUUGAAACUUGGCUC	24	Medtr7g080750.1	| purine permease | HC | chr7:30745503-30743754 | 20130731	2.5	-1	1	24	440	463	UAGUGAACUUUUGAAACUUGGCUC	.::: : :::::::::::::.	UUAUCAACUCUCAAAAGUUCACUG	Cleavage	1
Cluster_123	UAGUGAACUUUUGAAACUUGGCUC	24	Medtr2g047912.1	| dentin sialophosphoprotein-like protein, putative | LC | chr2:21013129-21015760 | 20130731	2.5	-1	1	24	119	142	UAGUGAACUUUUGAAACUUGGCUC	::::::.:.:.:::.:.::	UAAAAAAGUUUUAGAGGUUUAUUA	Cleavage	1
Cluster_125	UAGAAUGUUGGAUUCGUAGCUACU	24	Medtr0010s0400.1	| methyltransferase domain protein, putative | HC | scaffold0010:254488-252344 | 20130731	2.5	-1	1	24	25	48	UAGAAUGUUGGAUUCGUAGCUACU	:::. :::::::.:::.::	CAUUUCUAUCAAUCCAAUAUUUUA	Cleavage	1
Cluster_125	UAGAAUGUUGGAUUCGUAGCUACU	24	Medtr0332s0010.1	| transmembrane protein, putative | HC | scaffold0332:350-2099 | 20130731	2.5	-1	1	24	202	225	UAGAAUGUUGGAUUCGUAGCUACU	.: ::. ::::::::::::::	CCAGGAUAUAAAUCCAACAUUCUA	Cleavage	1
Cluster_125	UAGAAUGUUGGAUUCGUAGCUACU	24	Medtr3g007690.1	| 50S ribosomal protein L5P | HC | chr3:1122156-1120010 | 20130731	2.5	-1	1	24	103	126	UAGAAUGUUGGAUUCGUAGCUACU	:: .::::::::::::.:.	UCACCCUUUGAAUCCAACAUUUUG	Cleavage	1
Cluster_126	UGAAACUGAAUGUUGUCCUGCCU	23	Medtr5g044570.1	| eukaryotic aspartyl protease family protein | LC | chr5:19573024-19574328 | 20130731	2.5	-1	1	23	328	350	UGAAACUGAAUGUUGUCCUGCCU	: ::.::::::..::::::	GGAAAUGAUAACAUUUGGUUUCA	Cleavage	1
Cluster_126	UGAAACUGAAUGUUGUCCUGCCU	23	Medtr3g115450.4	| niemann-pick C1-like protein | HC | chr3:54006798-53989923 | 20130731	2.5	-1	1	23	1472	1494	UGAAACUGAAUGUUGUCCUGCCU	::::::::::: ::::::	UCAGAGGACAACAUUAAGUUUCU	Cleavage	1
Cluster_126	UGAAACUGAAUGUUGUCCUGCCU	23	Medtr4g084130.1	| TCP-1/cpn60 chaperonin family protein | HC | chr4:32768836-32775738 | 20130731	2.5	-1	1	23	2548	2570	UGAAACUGAAUGUUGUCCUGCCU	::::::.::: .:::::::	UCCAAGGACAGCAUAUAGUUUCA	Cleavage	1
Cluster_126	UGAAACUGAAUGUUGUCCUGCCU	23	Medtr3g115450.1	| niemann-pick C1-like protein | HC | chr3:54007010-53991920 | 20130731	2.5	-1	1	23	1369	1391	UGAAACUGAAUGUUGUCCUGCCU	::::::::::: ::::::	UCAGAGGACAACAUUAAGUUUCU	Cleavage	1
Cluster_126	UGAAACUGAAUGUUGUCCUGCCU	23	Medtr3g115450.2	| niemann-pick C1-like protein | HC | chr3:54006806-53989459 | 20130731	2.5	-1	1	23	1480	1502	UGAAACUGAAUGUUGUCCUGCCU	::::::::::: ::::::	UCAGAGGACAACAUUAAGUUUCU	Cleavage	1
Cluster_126	UGAAACUGAAUGUUGUCCUGCCU	23	Medtr5g430750.1	| zinc finger, C3HC4 type (RING finger) protein | HC | chr5:13102199-13099559 | 20130731	2.5	-1	1	23	926	948	UGAAACUGAAUGUUGUCCUGCCU	: ::.::..::::::::::	GAUGAUGAUAAUGUUCAGUUUCA	Cleavage	1
Cluster_126	UGAAACUGAAUGUUGUCCUGCCU	23	Medtr3g115450.3	| niemann-pick C1-like protein | HC | chr3:54006798-53989443 | 20130731	2.5	-1	1	23	1472	1494	UGAAACUGAAUGUUGUCCUGCCU	::::::::::: ::::::	UCAGAGGACAACAUUAAGUUUCU	Cleavage	1
Cluster_126	UGAAACUGAAUGUUGUCCUGCCU	23	Medtr5g030690.1	| zinc finger, C3HC4 type (RING finger) protein | HC | chr5:13031775-13029571 | 20130731	2.5	-1	1	23	685	707	UGAAACUGAAUGUUGUCCUGCCU	: ::.::..::::::::::	GAUGAUGAUAAUGUUCAGUUUCA	Cleavage	1
Cluster_1273	UAAAUAGAUGUGUUGGGUUAGUAAG	25	Medtr7g096320.1	| cytochrome P450 family 94 protein | HC | chr7:38641645-38643422 | 20130731	2.5	-1	1	25	1751	1775	UAAAUAGAUGUGUUGGGUUAGUAAG	::..:::...::..::::::::::	GUUGUUAAUUUAAUGCAUCUAUUUA	Cleavage	1
Cluster_1275	UCCACAAUCAUCCUGGACG	19	Medtr4g008770.1	| U5 small nuclear ribonucleoprotein 200 kDa helicase, putative | LC | chr4:1676751-1672827 | 20130731	2.5	-1	1	19	122	140	UCCACAAUCAUCCUGGACG	:::.. ::.::::::::::	CGUUUUGGGUGAUUGUGGA	Cleavage	2
Cluster_1275	UCCACAAUCAUCCUGGACG	19	Medtr4g011450.2	| U5 small nuclear ribonucleoprotein 200 kDa helicase | HC | chr4:2793467-2800740 | 20130731	2.5	-1	1	19	3735	3753	UCCACAAUCAUCCUGGACG	:::.. ::.::::::::::	CGUUUUGGGUGAUUGUGGA	Cleavage	1
Cluster_1275	UCCACAAUCAUCCUGGACG	19	Medtr4g008770.1	| U5 small nuclear ribonucleoprotein 200 kDa helicase, putative | LC | chr4:1676751-1672827 | 20130731	2.5	-1	1	19	1058	1076	UCCACAAUCAUCCUGGACG	:::.. ::.::::::::::	CGUUUUGGGUGAUUGUGGA	Cleavage	2
Cluster_1275	UCCACAAUCAUCCUGGACG	19	Medtr4g011450.1	| U5 small nuclear ribonucleoprotein 200 kDa helicase | HC | chr4:2793467-2800896 | 20130731	2.5	-1	1	19	3735	3753	UCCACAAUCAUCCUGGACG	:::.. ::.::::::::::	CGUUUUGGGUGAUUGUGGA	Cleavage	1
Cluster_1277	UCUUAGGAUCAUGAAAUUUUUCA	23	Medtr5g040600.1	| transmembrane protein, putative | HC | chr5:17838417-17832271 | 20130731	2.5	-1	1	23	844	866	UCUUAGGAUCAUGAAAUUUUUCA	::.::: :::::::::..::::.	UGGAAAUUUUCAUGAUUUUAAGG	Cleavage	1
Cluster_1278	UCACGGAGAGAACUUUGUGGCCU	23	Medtr4g109490.1	| carbohydrate-binding X8 domain protein | HC | chr4:45490625-45494969 | 20130731	2.5	-1	1	23	1399	1421	UCACGGAGAGAACUUUGUGGCCU	.: ::::::::::::::: :	CUCUCUCAAAGUUCUCUCCGUCA	Cleavage	1
Cluster_1278	UCACGGAGAGAACUUUGUGGCCU	23	Medtr1g029150.1	| stearoyl-acyl-carrier desaturase | HC | chr1:9950088-9952717 | 20130731	2.5	-1	1	23	409	431	UCACGGAGAGAACUUUGUGGCCU	::::::.::::.::::: :::	CAGCCACAGAGUUUUCUCCCUGA	Cleavage	1
Cluster_1278	UCACGGAGAGAACUUUGUGGCCU	23	Medtr7g052820.1	| actin-binding calponin-like (CH) domain protein | HC | chr7:18575162-18581857 | 20130731	2.5	-1	1	23	1354	1376	UCACGGAGAGAACUUUGUGGCCU	:::::::::::::: :::	GCAAAACAAAGUUCUCUCCUUGA	Cleavage	1
Cluster_128	UUGUAUGGAUCAUCAUUUAGUUGA	24	Medtr8g106900.1	| glutaredoxin (GRX) family protein | HC | chr8:45144705-45143614 | 20130731	2.5	-1	1	24	455	478	UUGUAUGGAUCAUCAUUUAGUUGA	:: ::.::.:::::.::::::	AGAAGAAAGUGGUGAUCUAUACAA	Cleavage	1
Cluster_128	UUGUAUGGAUCAUCAUUUAGUUGA	24	Medtr2g080040.1	| peroxisomal membrane 22 kDa (Mpv17/PMP22) family protein | HC | chr2:33779312-33775948 | 20130731	2.5	-1	1	24	1586	1609	UUGUAUGGAUCAUCAUUUAGUUGA	: :..::.:::.::.::::::::	UGAGUUAGAUGGUGGUCCAUACAC	Cleavage	1
Cluster_128	UUGUAUGGAUCAUCAUUUAGUUGA	24	Medtr6g087150.1	| RING-H2 finger protein ATL4J | HC | chr6:33511896-33513722 | 20130731	2.5	-1	1	24	376	399	UUGUAUGGAUCAUCAUUUAGUUGA	:::.:::::::::: :.::	UCCUAUAAGUGAUGAUCCAAAUAA	Cleavage	1
Cluster_128	UUGUAUGGAUCAUCAUUUAGUUGA	24	Medtr1g081750.1	| chromatin remodeling complex subunit | LC | chr1:36372091-36376631 | 20130731	2.5	-1	1	24	825	848	UUGUAUGGAUCAUCAUUUAGUUGA	..::::: :::: ::::::::	UGUGUUAAAUCAUGAGCCAUACAA	Cleavage	1
Cluster_1280	UGAACAUUGGUCAAGGAUCUGAAGU	25	Medtr4g015050.1	| TIR-NBS-LRR class disease resistance protein | HC | chr4:4340255-4346468 | 20130731	2.5	-1	1	25	303	325	UGAACAUUGGUCAAGGAUCUGAAGU	:::: :: ::::::.::::::::	ACUU--GACCCUUGAUCAAUGUUCC	Cleavage	1
Cluster_1280	UGAACAUUGGUCAAGGAUCUGAAGU	25	Medtr5g014710.1	| glyoxysomal malate dehydrogenase | HC | chr5:4992016-4987668 | 20130731	2.5	-1	1	25	256	280	UGAACAUUGGUCAAGGAUCUGAAGU	::.::::::::::::::	GUGGUUCUUCUUUGACCAAUGUUCA	Cleavage	1
Cluster_1286	UUGAUGUCAAAUGAUGAUG	19	Medtr3g024510.1	| GDSL-like lipase/acylhydrolase | HC | chr3:7612239-7617360 | 20130731	2.5	-1	1	19	968	986	UUGAUGUCAAAUGAUGAUG	::::::::::::.::: :.	CAUCAUCAUUUGGCAUAAG	Cleavage	1
Cluster_1286	UUGAUGUCAAAUGAUGAUG	19	Medtr4g046877.1	| anaphase-promoting complex subunit 11 RING-H2 finger protein | HC | chr4:16748749-16744181 | 20130731	2.5	-1	1	19	677	695	UUGAUGUCAAAUGAUGAUG	.::.::.:::::.::::.:	UAUUAUUAUUUGGCAUCGA	Cleavage	1
Cluster_1286	UUGAUGUCAAAUGAUGAUG	19	Medtr4g103430.1	| subtilisin-like serine protease | HC | chr4:42732284-42736930 | 20130731	2.5	-1	1	19	125	143	UUGAUGUCAAAUGAUGAUG	: :::::::::::.::..:	CUUCAUCAUUUGAUAUUGA	Cleavage	1
Cluster_1286	UUGAUGUCAAAUGAUGAUG	19	Medtr4g103480.1	| subtilisin-like serine protease | HC | chr4:42755811-42751129 | 20130731	2.5	-1	1	19	176	194	UUGAUGUCAAAUGAUGAUG	: :::::::::::.::..:	CUUCAUCAUUUGAUAUUGA	Cleavage	1
Cluster_1286	UUGAUGUCAAAUGAUGAUG	19	Medtr4g103400.1	| subtilisin-like serine protease | LC | chr4:42720421-42714850 | 20130731	2.5	-1	1	19	125	143	UUGAUGUCAAAUGAUGAUG	: :::::::::::.::..:	CUUCAUCAUUUGAUAUUGA	Cleavage	1
Cluster_1286	UUGAUGUCAAAUGAUGAUG	19	Medtr4g103450.1	| subtilisin-like serine protease | HC | chr4:42745543-42741770 | 20130731	2.5	-1	1	19	47	65	UUGAUGUCAAAUGAUGAUG	: :::::::::::.::..:	CUUCAUCAUUUGAUAUUGA	Cleavage	1
Cluster_1288	UGAGCCGGGUUCUCUGUAAGACAG	24	Medtr4g119780.1	| C2 domain protein | HC | chr4:49623846-49624891 | 20130731	2.5	-1	1	24	732	755	UGAGCCGGGUUCUCUGUAAGACAG	::::.:.: ::::::::::	AACGGUUACGGGGUACCCGGCUCA	Translation	1
Cluster_1289	UCUGGCUACUGUAUAUCGAGGCAGC	25	Medtr1g009110.1	| F-box protein interaction domain protein | LC | chr1:1177550-1178689 | 20130731	2.5	-1	1	24	1	24	UCUGGCUACUGUAUAUCGAGGCAG	:: :::::.:.::: :::::::	AUGGAUCGAUGUGCAGCAGCCAGA	Cleavage	1
Cluster_129	UUUUUUGGCACGUUGGAAGAACC	23	Medtr3g015560.1	| NBS-LRR type disease resistance protein | HC | chr3:4525721-4534925 | 20130731	2.5	-1	1	23	1226	1248	UUUUUUGGCACGUUGGAAGAACC	:::.::.::::.:.:::.:	GUGGCUUUCAGCGUGUCGAAAGA	Cleavage	1
Cluster_129	UUUUUUGGCACGUUGGAAGAACC	23	Medtr1g089890.1	| hypothetical protein | HC | chr1:40253460-40252330 | 20130731	2.5	-1	1	23	599	621	UUUUUUGGCACGUUGGAAGAACC	:: : :.::::::::.::.:::	AGUACAUUCAACGUGCUAAGAAA	Cleavage	1
Cluster_129	UUUUUUGGCACGUUGGAAGAACC	23	Medtr4g033235.1	| 26S proteasome regulatory particle triple-A ATPase protein | HC | chr4:11596994-11593480 | 20130731	2.5	-1	1	23	962	984	UUUUUUGGCACGUUGGAAGAACC	:::::::: :::::::.:.	ACGCCUUCCAACUUGCCAAAGAG	Translation	1
Cluster_129	UUUUUUGGCACGUUGGAAGAACC	23	Medtr2g078340.1	| calcium-binding EF-hand protein | HC | chr2:32614673-32617960 | 20130731	2.5	-1	1	23	71	93	UUUUUUGGCACGUUGGAAGAACC	:.::::::::::...::::.	GAAUUUUCCAACGUGUUGAAAAG	Cleavage	1
Cluster_129	UUUUUUGGCACGUUGGAAGAACC	23	Medtr7g114320.1	| aspartyl protease family protein, putative | LC | chr7:47189563-47188847 | 20130731	2.5	-1	1	23	325	347	UUUUUUGGCACGUUGGAAGAACC	::: :::..::::::...:::::	GGUGCUUUUAACGUGUUGAAAAA	Cleavage	1
Cluster_129	UUUUUUGGCACGUUGGAAGAACC	23	Medtr3g015560.2	| NBS-LRR type disease resistance protein | HC | chr3:4527374-4534944 | 20130731	2.5	-1	1	23	1139	1161	UUUUUUGGCACGUUGGAAGAACC	:::.::.::::.:.:::.:	GUGGCUUUCAGCGUGUCGAAAGA	Cleavage	1
Cluster_129	UUUUUUGGCACGUUGGAAGAACC	23	Medtr3g074180.1	| trehalose-6-phosphate phosphatase | HC | chr3:33495649-33493144 | 20130731	2.5	-1	1	23	1189	1211	UUUUUUGGCACGUUGGAAGAACC	: .:::.:..:::::::::.:	CUUGUUUCUAGUGUGCCAAAAGA	Cleavage	1
Cluster_1290	UCCAGAUAAGUUCGGCACUAAGAGC	25	Medtr3g032960.1	| LRR and NB-ARC domain disease resistance protein | LC | chr3:10434947-10429930 | 20130731	2.5	-1	1	25	4108	4132	UCCAGAUAAGUUCGGCACUAAGAGC	.:.: : :: :::::::::::::.	AUUUUCAAUGGCGAACUUAUCUGGG	Cleavage	1
Cluster_1291	UAUCUAUUUCUGGUGGUCACCCG	23	Medtr1g097955.1	| carboxypeptidase D-like protein | HC | chr1:44154278-44147405 | 20130731	2.5	-1	1	23	1233	1255	UAUCUAUUUCUGGUGGUCACCCG	: .::.:::::.:::::::	UUACUUGCCGCCAGAGAUAGAUA	Cleavage	1
Cluster_1291	UAUCUAUUUCUGGUGGUCACCCG	23	Medtr4g079390.1	| general transcription factor 3C-like protein | HC | chr4:30684330-30698647 | 20130731	2.5	-1	1	23	297	319	UAUCUAUUUCUGGUGGUCACCCG	: : :::::::::::: ::::	AAGAUUACCACCAGAAAUCGAUA	Cleavage	1
Cluster_1293	UUUAAAUCAGGACUUUGGGCAGCC	24	Medtr4g105110.1	| armadillo repeat only 1 protein | HC | chr4:43549841-43551628 | 20130731	2.5	-1	1	24	1677	1700	UUUAAAUCAGGACUUUGGGCAGCC	::.:::: :::::::::.::	UCUAGCUCAAAAUCCUGAUUUGAA	Cleavage	1
Cluster_1293	UUUAAAUCAGGACUUUGGGCAGCC	24	Medtr5g083500.1	| hypothetical protein | HC | chr5:36041024-36043169 | 20130731	2.5	-1	1	24	1244	1267	UUUAAAUCAGGACUUUGGGCAGCC	::: :::::.::.::::.:	AUUAACCCUAAGUCUUGGUUUAGA	Cleavage	1
Cluster_1293	UUUAAAUCAGGACUUUGGGCAGCC	24	Medtr3g071950.1	| hypothetical protein | HC | chr3:32316175-32318324 | 20130731	2.5	-1	1	24	1228	1251	UUUAAAUCAGGACUUUGGGCAGCC	.:::::::: ::.::::::	AUUAAUCCAAAGUCAUGGUUUAAA	Translation	1
Cluster_1293	UUUAAAUCAGGACUUUGGGCAGCC	24	Medtr4g105110.2	| armadillo repeat only 1 protein | HC | chr4:43549436-43551628 | 20130731	2.5	-1	1	24	1994	2017	UUUAAAUCAGGACUUUGGGCAGCC	::.:::: :::::::::.::	UCUAGCUCAAAAUCCUGAUUUGAA	Cleavage	1
Cluster_1297	UGUUCAUCAGAUUGGUCUUCUGG	23	Medtr4g098920.1	| dynamin-like protein 1E | HC | chr4:40852807-40858241 | 20130731	2.5	-1	1	23	831	853	UGUUCAUCAGAUUGGUCUUCUGG	:::::...::.:::::.:::	GACGAAGAUUGAUUUGAUGGACA	Cleavage	1
Cluster_1297	UGUUCAUCAGAUUGGUCUUCUGG	23	Medtr4g007710.1	| hypothetical protein | HC | chr4:1204102-1199740 | 20130731	2.5	-1	1	23	1351	1373	UGUUCAUCAGAUUGGUCUUCUGG	.: :: :: ::.:::::::::::	UCUGAUGAACAGUCUGAUGAACA	Cleavage	1
Cluster_1297	UGUUCAUCAGAUUGGUCUUCUGG	23	Medtr4g123110.1	| calcium-dependent lipid-binding-like protein | HC | chr4:50875754-50826418 | 20130731	2.5	-1	1	23	2077	2099	UGUUCAUCAGAUUGGUCUUCUGG	:.::: .:::.::::::::.::	GCGGAAAGCCAGUCUGAUGAGCA	Cleavage	1
Cluster_1299	UUCGGAUGCCUUUAUUCAUGAGG	23	Medtr2g033650.2	| transmembrane protein, putative | HC | chr2:12805524-12802975 | 20130731	2.5	-1	1	23	424	446	UUCGGAUGCCUUUAUUCAUGAGG	.:.:::: :.::::.:::.:::	GUUUAUGAUUGAAGGUAUCUGAA	Cleavage	1
Cluster_1299	UUCGGAUGCCUUUAUUCAUGAGG	23	Medtr7g023750.2	| DNA-binding protein, putative | HC | chr7:7758889-7755259 | 20130731	2.5	-1	1	23	240	262	UUCGGAUGCCUUUAUUCAUGAGG	.:::::::::::: ::.:.:	AGAUAUGAAUAAAGGCUUCUGGA	Cleavage	1
Cluster_1299	UUCGGAUGCCUUUAUUCAUGAGG	23	Medtr7g023750.4	| DNA-binding protein, putative | HC | chr7:7758889-7755259 | 20130731	2.5	-1	1	23	240	262	UUCGGAUGCCUUUAUUCAUGAGG	.:::::::::::: ::.:.:	AGAUAUGAAUAAAGGCUUCUGGA	Cleavage	1
Cluster_1310	UAUAGUGAUCAACGUACGGUAUGUA	25	Medtr6g008800.1	| ABC transporter B family protein | HC | chr6:2429240-2441152 | 20130731	2.5	-1	1	25	4027	4051	UAUAGUGAUCAACGUACGGUAUGUA	::: .: ::.::::::::.::::	CACAAUUCCUAUGUUGAUCAUUAUA	Cleavage	1
Cluster_1315	UUGGAGAAUGAGGUUCUGCCU	21	Medtr8g075170.1	| hypothetical protein | LC | chr8:31775774-31775601 | 20130731	2.5	-1	1	21	67	87	UUGGAGAAUGAGGUUCUGCCU	:: :::.::.:::::.:::	UCGCCGAAUCUUAUUCUUCAA	Cleavage	1
Cluster_1315	UUGGAGAAUGAGGUUCUGCCU	21	Medtr1g082430.1	| Mog1/PsbP/DUF1795-like photosystem II reaction center PsbP family protein | HC | chr1:36642633-36645890 | 20130731	2.5	-1	1	21	138	158	UUGGAGAAUGAGGUUCUGCCU	: :. :::::::::::::::	CGCCGCAACCUCAUUCUCCAA	Cleavage	1
Cluster_1319	UUACCUUUUCUUCUAGUUGAU	21	Medtr4g076240.1	| heat shock protein DnaJ with TPR protein, putative | HC | chr4:29211178-29201226 | 20130731	2.5	-1	1	21	2503	2523	UUACCUUUUCUUCUAGUUGAU	: :::: ::::::::::::.	AACAACAAGAAGAAAAGGUGU	Cleavage	1
Cluster_1319	UUACCUUUUCUUCUAGUUGAU	21	Medtr4g031910.1	| MADS-box transcription factor family protein | LC | chr4:10986757-10987446 | 20130731	2.5	-1	1	20	1	20	UUACCUUUUCUUCUAGUUGA	..::::::::::::: :::	AUGACUAGAAGAAAAGUUAA	Cleavage	1
Cluster_1319	UUACCUUUUCUUCUAGUUGAU	21	Medtr7g032360.1	| PPR containing plant-like protein | HC | chr7:11369613-11371524 | 20130731	2.5	-1	1	21	1349	1369	UUACCUUUUCUUCUAGUUGAU	::.:::.::::::::::.	UAAAAUUAGGAGAAAAGGUAG	Cleavage	1
Cluster_1319	UUACCUUUUCUUCUAGUUGAU	21	Medtr7g051650.1	| glycoside hydrolase family 1 protein | LC | chr7:18130209-18118849 | 20130731	2.5	-1	1	21	1696	1716	UUACCUUUUCUUCUAGUUGAU	:::::: :::::::::: ::	CUCAACUUGAAGAAAAGGCAA	Cleavage	1
Cluster_1319	UUACCUUUUCUUCUAGUUGAU	21	Medtr7g051650.2	| glycoside hydrolase family 1 protein | LC | chr7:18130206-18118849 | 20130731	2.5	-1	1	21	1681	1701	UUACCUUUUCUUCUAGUUGAU	:::::: :::::::::: ::	CUCAACUUGAAGAAAAGGCAA	Cleavage	1
Cluster_1319	UUACCUUUUCUUCUAGUUGAU	21	Medtr6g054190.1	| hypothetical protein | LC | chr6:19591609-19592216 | 20130731	2.5	-1	1	21	113	133	UUACCUUUUCUUCUAGUUGAU	.:::: :.::::::.:::::.	GUCAAAUGGAAGAAGAGGUAG	Cleavage	1
Cluster_1319	UUACCUUUUCUUCUAGUUGAU	21	Medtr1g084990.2	| hypothetical protein | LC | chr1:37942367-37937971 | 20130731	2.5	-1	1	21	1121	1141	UUACCUUUUCUUCUAGUUGAU	:::::.: :::::.:::::.:	AUCAAUUUGAAGAGAAGGUGA	Cleavage	1
Cluster_1319	UUACCUUUUCUUCUAGUUGAU	21	Medtr3g117610.1	| SAUR-like auxin-responsive family protein | HC | chr3:55072682-55071914 | 20130731	2.5	-1	1	21	542	562	UUACCUUUUCUUCUAGUUGAU	:: ::: :::::::::::.:	CUCUACUUGAAGAAAAGGUGA	Cleavage	1
Cluster_1319	UUACCUUUUCUUCUAGUUGAU	21	Medtr1g084990.1	| hypothetical protein | LC | chr1:37943685-37937964 | 20130731	2.5	-1	1	21	1525	1545	UUACCUUUUCUUCUAGUUGAU	:::::.: :::::.:::::.:	AUCAAUUUGAAGAGAAGGUGA	Cleavage	1
Cluster_1321	UGGAUUAGAGAAUUUGAAG	19	Medtr1g010290.1	| enhancer of polycomb-like transcription factor protein | HC | chr1:1894865-1888016 | 20130731	2.5	-1	1	19	3254	3272	UGGAUUAGAGAAUUUGAAG	::::::.::::.:::: ::	CUUCAAGUUCUUUAAUACA	Cleavage	1
Cluster_1321	UGGAUUAGAGAAUUUGAAG	19	Medtr7g112860.3	| dormancy/auxin associated protein | HC | chr7:46440002-46441582 | 20130731	2.5	-1	1	19	501	519	UGGAUUAGAGAAUUUGAAG	.::.:::::.:.::::.::	UUUUAAAUUUUUUAAUUCA	Cleavage	1
Cluster_1321	UGGAUUAGAGAAUUUGAAG	19	Medtr0429s0020.1	| pentatricopeptide (PPR) repeat protein | LC | scaffold0429:4891-7845 | 20130731	2.5	-1	1	19	818	836	UGGAUUAGAGAAUUUGAAG	:::. ::::::.:::::.:	CUUUCAAUUCUUUAAUCUA	Cleavage	1
Cluster_1321	UGGAUUAGAGAAUUUGAAG	19	Medtr3g013490.1	| hypothetical protein | HC | chr3:3630934-3641918 | 20130731	2.5	-1	1	19	684	702	UGGAUUAGAGAAUUUGAAG	:::.::: :::::.:::::	CUUUAAAAUCUCUGAUCCA	Cleavage	1
Cluster_1321	UGGAUUAGAGAAUUUGAAG	19	Medtr7g113420.1	| alpha/beta hydrolase family protein | HC | chr7:46724906-46721006 | 20130731	2.5	-1	1	19	85	103	UGGAUUAGAGAAUUUGAAG	.::: ::::::.:.:::::	UUUCUAAUUCUUUGAUCCA	Cleavage	1
Cluster_1321	UGGAUUAGAGAAUUUGAAG	19	Medtr7g113420.2	| alpha/beta hydrolase family protein | HC | chr7:46724870-46721014 | 20130731	2.5	-1	1	19	49	67	UGGAUUAGAGAAUUUGAAG	.::: ::::::.:.:::::	UUUCUAAUUCUUUGAUCCA	Cleavage	1
Cluster_1321	UGGAUUAGAGAAUUUGAAG	19	Medtr3g448620.1	| pentatricopeptide (PPR) repeat protein | LC | chr3:16349669-16351514 | 20130731	2.5	-1	1	19	689	707	UGGAUUAGAGAAUUUGAAG	:::. :.::::::::::.:	CUUUCAGUUCUCUAAUCUA	Cleavage	1
Cluster_1321	UGGAUUAGAGAAUUUGAAG	19	Medtr7g005870.1	| PPR containing plant-like protein | HC | chr7:378521-375734 | 20130731	2.5	-1	1	19	1930	1948	UGGAUUAGAGAAUUUGAAG	.:::::: :::.:::::::	UUUCAAAAUCUUUAAUCCA	Cleavage	1
Cluster_1321	UGGAUUAGAGAAUUUGAAG	19	Medtr2g034010.1	| huntingtin-interacting K-like protein | HC | chr2:12970294-12973745 | 20130731	2.5	-1	1	19	605	623	UGGAUUAGAGAAUUUGAAG	: :::::::.:::..::::	CCUCAAAUUUUCUGGUCCA	Cleavage	1
Cluster_1321	UGGAUUAGAGAAUUUGAAG	19	Medtr0308s0020.1	| pentatricopeptide (PPR) repeat protein | LC | scaffold0308:7816-9441 | 20130731	2.5	-1	1	19	692	710	UGGAUUAGAGAAUUUGAAG	:::. :.::::::::::.:	CUUUCAGUUCUCUAAUCUA	Cleavage	1
Cluster_1321	UGGAUUAGAGAAUUUGAAG	19	Medtr0051s0090.1	| pentatricopeptide (PPR) repeat protein | LC | scaffold0051:44584-42871 | 20130731	2.5	-1	1	19	485	503	UGGAUUAGAGAAUUUGAAG	:::. ::::::.:::::.:	CUUUCAAUUCUUUAAUCUA	Cleavage	1
Cluster_1321	UGGAUUAGAGAAUUUGAAG	19	Medtr0019s0210.2	| pentatricopeptide (PPR) repeat protein | LC | scaffold0019:127328-125664 | 20130731	2.5	-1	1	19	719	737	UGGAUUAGAGAAUUUGAAG	:::. :::::::::::..:	CUUUCAAUUCUCUAAUUUA	Cleavage	1
Cluster_1321	UGGAUUAGAGAAUUUGAAG	19	Medtr0019s0210.3	| pentatricopeptide (PPR) repeat protein | LC | scaffold0019:127328-125664 | 20130731	2.5	-1	1	19	719	737	UGGAUUAGAGAAUUUGAAG	:::. :::::::::::..:	CUUUCAAUUCUCUAAUUUA	Cleavage	1
Cluster_1321	UGGAUUAGAGAAUUUGAAG	19	Medtr0014s0260.1	| pentatricopeptide (PPR) repeat protein | LC | scaffold0014:138663-140807 | 20130731	2.5	-1	1	19	512	530	UGGAUUAGAGAAUUUGAAG	:::. :.::::::::::.:	CUUUCAGUUCUCUAAUCUA	Cleavage	1
Cluster_1321	UGGAUUAGAGAAUUUGAAG	19	Medtr0019s0210.1	| pentatricopeptide (PPR) repeat protein | LC | scaffold0019:127328-125664 | 20130731	2.5	-1	1	19	719	737	UGGAUUAGAGAAUUUGAAG	:::. :::::::::::..:	CUUUCAAUUCUCUAAUUUA	Cleavage	1
Cluster_1321	UGGAUUAGAGAAUUUGAAG	19	Medtr1g072130.1	| PHD finger protein, putative | HC | chr1:31996824-31986308 | 20130731	2.5	-1	1	19	92	110	UGGAUUAGAGAAUUUGAAG	::::::::::::::: ::	CUUCAAAUUCUCUAAACCU	Cleavage	1
Cluster_1322	CGGAACCAUAGUAAUUAUAAAUG	23	Medtr3g079560.1	| serine carboxypeptidase-like protein | HC | chr3:35911950-35909107 | 20130731	2.5	-1	1	23	1047	1069	CGGAACCAUAGUAAUUAUAAAUG	:: :.::::.::::::::.:	UUGUUCUGAUUAUUAUGGUUCUG	Cleavage	1
Cluster_133	UGUAUGCUUUCAAGUUGAU	19	Medtr3g011280.2	| disease resistance protein (CC-NBS-LRR class) family protein | HC | chr3:2758573-2761969 | 20130731	2.5	-1	1	19	232	250	UGUAUGCUUUCAAGUUGAU	:: ::::::::::::: ::	AUGAACUUGAAAGCAUUCA	Cleavage	1
Cluster_133	UGUAUGCUUUCAAGUUGAU	19	Medtr3g108830.1	| hypothetical protein | LC | chr3:50306825-50308303 | 20130731	2.5	-1	1	19	575	593	UGUAUGCUUUCAAGUUGAU	::::: :::::::..:.::	AUCAAGUUGAAAGUGUGCA	Cleavage	1
Cluster_133	UGUAUGCUUUCAAGUUGAU	19	Medtr4g099180.2	| MORN repeat protein | HC | chr4:41091178-41085791 | 20130731	2.5	-1	1	19	2456	2474	UGUAUGCUUUCAAGUUGAU	:::::::::::::: :::	UUCAACUUGAAAGCAAACA	Cleavage	1
Cluster_133	UGUAUGCUUUCAAGUUGAU	19	Medtr3g011280.1	| disease resistance protein (CC-NBS-LRR class) family protein | HC | chr3:2758573-2761969 | 20130731	2.5	-1	1	19	232	250	UGUAUGCUUUCAAGUUGAU	:: ::::::::::::: ::	AUGAACUUGAAAGCAUUCA	Cleavage	1
Cluster_133	UGUAUGCUUUCAAGUUGAU	19	Medtr3g103180.1	| hypothetical protein | HC | chr3:47563535-47561463 | 20130731	2.5	-1	1	19	800	818	UGUAUGCUUUCAAGUUGAU	: :::.::::::::::..:	AACAAUUUGAAAGCAUGUA	Cleavage	1
Cluster_133	UGUAUGCUUUCAAGUUGAU	19	Medtr4g099180.1	| MORN repeat protein | HC | chr4:41091178-41085791 | 20130731	2.5	-1	1	19	2137	2155	UGUAUGCUUUCAAGUUGAU	:::::::::::::: :::	UUCAACUUGAAAGCAAACA	Cleavage	1
Cluster_133	UGUAUGCUUUCAAGUUGAU	19	Medtr4g099180.3	| MORN repeat protein | HC | chr4:41091178-41085791 | 20130731	2.5	-1	1	19	3090	3108	UGUAUGCUUUCAAGUUGAU	:::::::::::::: :::	UUCAACUUGAAAGCAAACA	Cleavage	1
Cluster_133	UGUAUGCUUUCAAGUUGAU	19	Medtr3g056585.1	| LRR and NB-ARC domain disease resistance protein | LC | chr3:22616366-22612832 | 20130731	2.5	-1	1	19	215	233	UGUAUGCUUUCAAGUUGAU	:: ::::::::::::: ::	AUGAACUUGAAAGCAUCCA	Cleavage	1
Cluster_133	UGUAUGCUUUCAAGUUGAU	19	Medtr3g456030.1	| LRR and NB-ARC domain disease resistance protein | LC | chr3:22104178-22107184 | 20130731	2.5	-1	1	19	107	125	UGUAUGCUUUCAAGUUGAU	:: ::::::::::::: ::	AUGAACUUGAAAGCAUCCA	Cleavage	1
Cluster_133	UGUAUGCUUUCAAGUUGAU	19	Medtr4g099180.4	| MORN repeat protein | HC | chr4:41091178-41085791 | 20130731	2.5	-1	1	19	2671	2689	UGUAUGCUUUCAAGUUGAU	:::::::::::::: :::	UUCAACUUGAAAGCAAACA	Cleavage	1
Cluster_133	UGUAUGCUUUCAAGUUGAU	19	Medtr3g055720.1	| NB-ARC domain disease resistance protein | LC | chr3:21936546-21940798 | 20130731	2.5	-1	1	19	169	187	UGUAUGCUUUCAAGUUGAU	:: ::::::::::::: ::	AUGAACUUGAAAGCAUCCA	Cleavage	1
Cluster_133	UGUAUGCUUUCAAGUUGAU	19	Medtr2g010015.1	| hypothetical protein | HC | chr2:2191635-2193995 | 20130731	2.5	-1	1	19	210	228	UGUAUGCUUUCAAGUUGAU	: :::::::.:.:.:::::	AACAACUUGGAGGUAUACA	Cleavage	1
Cluster_133	UGUAUGCUUUCAAGUUGAU	19	Medtr3g055740.1	| NB-ARC domain disease resistance protein | LC | chr3:21945088-21947850 | 20130731	2.5	-1	1	19	107	125	UGUAUGCUUUCAAGUUGAU	:: ::::::::::::: ::	AUGAACUUGAAAGCAUUCA	Cleavage	1
Cluster_133	UGUAUGCUUUCAAGUUGAU	19	Medtr5g080650.1	| pattern formation protein GNOM protein | HC | chr5:34512394-34520250 | 20130731	2.5	-1	1	19	2504	2522	UGUAUGCUUUCAAGUUGAU	:::: ::::::::.::::	AUCAUCUUGAAAGUAUACU	Cleavage	1
Cluster_133	UGUAUGCUUUCAAGUUGAU	19	Medtr3g011280.3	| disease resistance protein (CC-NBS-LRR class) family protein | HC | chr3:2758573-2761969 | 20130731	2.5	-1	1	19	232	250	UGUAUGCUUUCAAGUUGAU	:: ::::::::::::: ::	AUGAACUUGAAAGCAUUCA	Cleavage	1
Cluster_133	UGUAUGCUUUCAAGUUGAU	19	Medtr0691s0020.1	| NB-ARC domain disease resistance protein | HC | scaffold0691:6888-2839 | 20130731	2.5	-1	1	19	189	207	UGUAUGCUUUCAAGUUGAU	:: ::::::::::::: ::	AUGAACUUGAAAGCAUUCA	Cleavage	1
Cluster_133	UGUAUGCUUUCAAGUUGAU	19	Medtr3g069210.1	| NB-ARC domain disease resistance protein | HC | chr3:30990418-30987078 | 20130731	2.5	-1	1	19	236	254	UGUAUGCUUUCAAGUUGAU	:: ::::::::::::: ::	AUGAACUUGAAAGCAUUCA	Cleavage	1
Cluster_133	UGUAUGCUUUCAAGUUGAU	19	Medtr3g056590.1	| NB-ARC domain disease resistance protein | LC | chr3:22621932-22618824 | 20130731	2.5	-1	1	19	108	126	UGUAUGCUUUCAAGUUGAU	:: ::::::::::::: ::	AUGAACUUGAAAGCAUCCA	Cleavage	1
Cluster_1338	UCUGUUGUAAUGUUUGAACUUGGUC	25	Medtr8g042820.1	| MFS transporter | HC | chr8:16571018-16568284 | 20130731	2.5	-1	1	25	557	581	UCUGUUGUAAUGUUUGAACUUGGUC	..:::.:::: :::::::.::	UAGGGGGUUUAAACUUUACAACGGA	Translation	1
Cluster_1338	UCUGUUGUAAUGUUUGAACUUGGUC	25	Medtr0093s0070.1	| hypothetical protein | LC | scaffold0093:17411-16444 | 20130731	2.5	-1	1	25	533	557	UCUGUUGUAAUGUUUGAACUUGGUC	.... :::::: :::::::::::	CCUUGGAUUCAAAGAUUACAACAGA	Cleavage	1
Cluster_1339	UCCAGAACCACGUACUGAUGAACA	24	Medtr8g069695.1	| carboxyl-terminal peptidase | LC | chr8:29341750-29344351 | 20130731	2.5	-1	1	24	574	597	UCCAGAACCACGUACUGAUGAACA	: : .::::: ::::::::.:::	UUUGUAUCAGGACGUGGUUUUGGC	Cleavage	1
Cluster_1341	UUAACAUCAAAAAUUGUAGAAGA	23	Medtr1g018910.1	| Serine/Threonine kinase, plant-type protein, putative | HC | chr1:5572370-5570944 | 20130731	2.5	-1	1	23	905	927	UUAACAUCAAAAAUUGUAGAAGA	::..:.:::::::::::..	GAAGCUGUAGUUUUUGAUGUUGG	Cleavage	1
Cluster_1341	UUAACAUCAAAAAUUGUAGAAGA	23	Medtr4g010050.1	| signal recognition particle 54 kDa protein | HC | chr4:2207891-2201607 | 20130731	2.5	-1	1	23	975	997	UUAACAUCAAAAAUUGUAGAAGA	:.:. :.:::::::::::::	GAAUUUGAAGUUUUUGAUGUUAA	Cleavage	1
Cluster_1341	UUAACAUCAAAAAUUGUAGAAGA	23	Medtr1g021540.2	| hypothetical protein | LC | chr1:6467974-6465780 | 20130731	2.5	-1	1	23	595	617	UUAACAUCAAAAAUUGUAGAAGA	::::: : ::::::::::::.	AAUUCUAGACUUUUUGAUGUUAG	Cleavage	1
Cluster_1341	UUAACAUCAAAAAUUGUAGAAGA	23	Medtr5g097260.2	| Nup133/Nup155-like nucleoporin | HC | chr5:42581684-42588319 | 20130731	2.5	-1	1	23	969	991	UUAACAUCAAAAAUUGUAGAAGA	:: :::.::::::.::::.:	AAAUCGACAGUUUUUGGUGUUGA	Cleavage	1
Cluster_1341	UUAACAUCAAAAAUUGUAGAAGA	23	Medtr5g044060.1	| subtilisin-like serine protease | HC | chr5:19375992-19375450 | 20130731	2.5	-1	1	23	10	32	UUAACAUCAAAAAUUGUAGAAGA	::::::::::.::::::	AAGAAAACAAUUUUUGGUGUUAA	Cleavage	1
Cluster_1341	UUAACAUCAAAAAUUGUAGAAGA	23	Medtr1g041300.2	| dentin sialophosphoprotein, putative | LC | chr1:15364835-15358641 | 20130731	2.5	-1	1	23	3782	3804	UUAACAUCAAAAAUUGUAGAAGA	.:::::::::::.::::.	AGAAUUACAAUUUUUGGUGUUGU	Cleavage	1
Cluster_1341	UUAACAUCAAAAAUUGUAGAAGA	23	Medtr1g021540.1	| hypothetical protein | LC | chr1:6467974-6465780 | 20130731	2.5	-1	1	23	643	665	UUAACAUCAAAAAUUGUAGAAGA	::::: : ::::::::::::.	AAUUCUAGACUUUUUGAUGUUAG	Cleavage	1
Cluster_1341	UUAACAUCAAAAAUUGUAGAAGA	23	Medtr7g066810.1	| mRNA capping enzyme-like protein | HC | chr7:24377246-24366435 | 20130731	2.5	-1	1	23	2602	2624	UUAACAUCAAAAAUUGUAGAAGA	.::.:::::::: ::::::	ACCCUUAUAAUUUUUGUUGUUAA	Cleavage	1
Cluster_1341	UUAACAUCAAAAAUUGUAGAAGA	23	Medtr1g041300.1	| dentin sialophosphoprotein, putative | LC | chr1:15365456-15358641 | 20130731	2.5	-1	1	23	4114	4136	UUAACAUCAAAAAUUGUAGAAGA	.:::::::::::.::::.	AGAAUUACAAUUUUUGGUGUUGU	Cleavage	1
Cluster_1341	UUAACAUCAAAAAUUGUAGAAGA	23	Medtr5g097260.1	| Nup133/Nup155-like nucleoporin | HC | chr5:42581684-42590964 | 20130731	2.5	-1	1	23	969	991	UUAACAUCAAAAAUUGUAGAAGA	:: :::.::::::.::::.:	AAAUCGACAGUUUUUGGUGUUGA	Cleavage	1
Cluster_1342	UAAAAUUAUUUAAAGUAUGGACU	23	Medtr1g057270.1	| late embryogenesis abundant protein | HC | chr1:25170569-25169254 | 20130731	2.5	-1	1	23	858	880	UAAAAUUAUUUAAAGUAUGGACU	: .:::..::::..:.::::::	UGGUCAUGUUUUAGGUGAUUUUA	Cleavage	1
Cluster_1342	UAAAAUUAUUUAAAGUAUGGACU	23	Medtr2g034350.1	| hypothetical protein | HC | chr2:13116652-13117159 | 20130731	2.5	-1	1	23	479	502	UAAAAUUAUUUAAAGU-AUGGACU	:::: :.::::::::::::::	AAACCAUCAUUUUAAAUAAUUUUA	Cleavage	1
Cluster_1342	UAAAAUUAUUUAAAGUAUGGACU	23	Medtr3g079640.1	| cobalamin-independent methionine synthase | HC | chr3:35943580-35948815 | 20130731	2.5	-1	1	23	2569	2591	UAAAAUUAUUUAAAGUAUGGACU	: .:::.:::.:::::::::	GCUAUAUAUUUUGAAUAAUUUUU	Cleavage	1
Cluster_1342	UAAAAUUAUUUAAAGUAUGGACU	23	Medtr2g040840.1	| hypothetical protein | HC | chr2:17894293-17893120 | 20130731	2.5	-1	1	23	115	137	UAAAAUUAUUUAAAGUAUGGACU	.:::..:: :::::::::::	AAAUCAUGUUUAAAAUAAUUUUA	Cleavage	1
Cluster_1343	UACAAUCAUCGCCAACUUUCUUCC	24	Medtr1g029710.7	| zinc finger CCCH domain protein, putative | HC | chr1:10267165-10277364 | 20130731	2.5	-1	1	24	1135	1158	UACAAUCAUCGCCAACUUUCUUCC	:::::: :: ::.::::::::::	AGAAGAAUGUAGGUGAUGAUUGUA	Cleavage	1
Cluster_1343	UACAAUCAUCGCCAACUUUCUUCC	24	Medtr1g029710.6	| zinc finger CCCH domain protein, putative | HC | chr1:10267165-10277364 | 20130731	2.5	-1	1	24	1135	1158	UACAAUCAUCGCCAACUUUCUUCC	:::::: :: ::.::::::::::	AGAAGAAUGUAGGUGAUGAUUGUA	Cleavage	1
Cluster_1343	UACAAUCAUCGCCAACUUUCUUCC	24	Medtr1g029710.1	| zinc finger CCCH domain protein, putative | HC | chr1:10267097-10277364 | 20130731	2.5	-1	1	24	1203	1226	UACAAUCAUCGCCAACUUUCUUCC	:::::: :: ::.::::::::::	AGAAGAAUGUAGGUGAUGAUUGUA	Cleavage	1
Cluster_1343	UACAAUCAUCGCCAACUUUCUUCC	24	Medtr1g029710.15	| zinc finger CCCH domain protein, putative | HC | chr1:10267165-10277364 | 20130731	2.5	-1	1	24	1135	1158	UACAAUCAUCGCCAACUUUCUUCC	:::::: :: ::.::::::::::	AGAAGAAUGUAGGUGAUGAUUGUA	Cleavage	1
Cluster_1343	UACAAUCAUCGCCAACUUUCUUCC	24	Medtr1g029710.17	| zinc finger CCCH domain protein, putative | HC | chr1:10267165-10277364 | 20130731	2.5	-1	1	24	1135	1158	UACAAUCAUCGCCAACUUUCUUCC	:::::: :: ::.::::::::::	AGAAGAAUGUAGGUGAUGAUUGUA	Cleavage	1
Cluster_1343	UACAAUCAUCGCCAACUUUCUUCC	24	Medtr1g029710.13	| zinc finger CCCH domain protein, putative | HC | chr1:10267165-10277364 | 20130731	2.5	-1	1	24	1135	1158	UACAAUCAUCGCCAACUUUCUUCC	:::::: :: ::.::::::::::	AGAAGAAUGUAGGUGAUGAUUGUA	Cleavage	1
Cluster_1343	UACAAUCAUCGCCAACUUUCUUCC	24	Medtr1g029710.12	| zinc finger CCCH domain protein, putative | HC | chr1:10267165-10277364 | 20130731	2.5	-1	1	24	1135	1158	UACAAUCAUCGCCAACUUUCUUCC	:::::: :: ::.::::::::::	AGAAGAAUGUAGGUGAUGAUUGUA	Cleavage	1
Cluster_1343	UACAAUCAUCGCCAACUUUCUUCC	24	Medtr1g029710.9	| zinc finger CCCH domain protein, putative | HC | chr1:10267165-10277364 | 20130731	2.5	-1	1	24	1135	1158	UACAAUCAUCGCCAACUUUCUUCC	:::::: :: ::.::::::::::	AGAAGAAUGUAGGUGAUGAUUGUA	Cleavage	1
Cluster_1343	UACAAUCAUCGCCAACUUUCUUCC	24	Medtr1g029710.4	| zinc finger CCCH domain protein, putative | HC | chr1:10267165-10277364 | 20130731	2.5	-1	1	24	1135	1158	UACAAUCAUCGCCAACUUUCUUCC	:::::: :: ::.::::::::::	AGAAGAAUGUAGGUGAUGAUUGUA	Cleavage	1
Cluster_1343	UACAAUCAUCGCCAACUUUCUUCC	24	Medtr1g029710.14	| zinc finger CCCH domain protein, putative | HC | chr1:10267165-10277364 | 20130731	2.5	-1	1	24	1135	1158	UACAAUCAUCGCCAACUUUCUUCC	:::::: :: ::.::::::::::	AGAAGAAUGUAGGUGAUGAUUGUA	Cleavage	1
Cluster_1343	UACAAUCAUCGCCAACUUUCUUCC	24	Medtr1g029710.3	| zinc finger CCCH domain protein, putative | HC | chr1:10267165-10277364 | 20130731	2.5	-1	1	24	1135	1158	UACAAUCAUCGCCAACUUUCUUCC	:::::: :: ::.::::::::::	AGAAGAAUGUAGGUGAUGAUUGUA	Cleavage	1
Cluster_1343	UACAAUCAUCGCCAACUUUCUUCC	24	Medtr1g029710.8	| zinc finger CCCH domain protein, putative | HC | chr1:10267165-10277364 | 20130731	2.5	-1	1	24	1135	1158	UACAAUCAUCGCCAACUUUCUUCC	:::::: :: ::.::::::::::	AGAAGAAUGUAGGUGAUGAUUGUA	Cleavage	1
Cluster_1343	UACAAUCAUCGCCAACUUUCUUCC	24	Medtr1g029710.2	| zinc finger CCCH domain protein, putative | HC | chr1:10267165-10277364 | 20130731	2.5	-1	1	24	1135	1158	UACAAUCAUCGCCAACUUUCUUCC	:::::: :: ::.::::::::::	AGAAGAAUGUAGGUGAUGAUUGUA	Cleavage	1
Cluster_1343	UACAAUCAUCGCCAACUUUCUUCC	24	Medtr1g029710.5	| zinc finger CCCH domain protein, putative | HC | chr1:10267165-10277364 | 20130731	2.5	-1	1	24	1135	1158	UACAAUCAUCGCCAACUUUCUUCC	:::::: :: ::.::::::::::	AGAAGAAUGUAGGUGAUGAUUGUA	Cleavage	1
Cluster_1343	UACAAUCAUCGCCAACUUUCUUCC	24	Medtr1g106560.1	| paired amphipathic helix protein | LC | chr1:48176221-48176400 | 20130731	2.5	-1	1	24	20	43	UACAAUCAUCGCCAACUUUCUUCC	:.::::::::::::: ::.	CUUCUAGAGUUGGCGAUGAUGGUG	Cleavage	1
Cluster_1343	UACAAUCAUCGCCAACUUUCUUCC	24	Medtr1g029710.16	| zinc finger CCCH domain protein, putative | HC | chr1:10267165-10277364 | 20130731	2.5	-1	1	24	1135	1158	UACAAUCAUCGCCAACUUUCUUCC	:::::: :: ::.::::::::::	AGAAGAAUGUAGGUGAUGAUUGUA	Cleavage	1
Cluster_1343	UACAAUCAUCGCCAACUUUCUUCC	24	Medtr1g029710.10	| zinc finger CCCH domain protein, putative | HC | chr1:10267165-10277364 | 20130731	2.5	-1	1	24	1135	1158	UACAAUCAUCGCCAACUUUCUUCC	:::::: :: ::.::::::::::	AGAAGAAUGUAGGUGAUGAUUGUA	Cleavage	1
Cluster_1343	UACAAUCAUCGCCAACUUUCUUCC	24	Medtr8g086060.1	| thioredoxin family protein, putative | HC | chr8:35719691-35722568 | 20130731	2.5	-1	1	24	823	846	UACAAUCAUCGCCAACUUUCUUCC	:.: :. :::::.:::::::::.	AGGACAGUGUUGGUGAUGAUUGUG	Cleavage	1
Cluster_1343	UACAAUCAUCGCCAACUUUCUUCC	24	Medtr2g089955.1	| transmembrane protein, putative | HC | chr2:38041777-38041280 | 20130731	2.5	-1	1	24	129	152	UACAAUCAUCGCCAACUUUCUUCC	:.: :: :::::::.::.::::.	UGGAAAAUGUUGGCGGUGGUUGUG	Cleavage	1
Cluster_1343	UACAAUCAUCGCCAACUUUCUUCC	24	Medtr1g029710.11	| zinc finger CCCH domain protein, putative | HC | chr1:10267165-10277364 | 20130731	2.5	-1	1	24	1135	1158	UACAAUCAUCGCCAACUUUCUUCC	:::::: :: ::.::::::::::	AGAAGAAUGUAGGUGAUGAUUGUA	Cleavage	1
Cluster_1343	UACAAUCAUCGCCAACUUUCUUCC	24	Medtr3g078120.1	| zinc finger, C3HC4 type (RING finger) protein | HC | chr3:35194086-35194877 | 20130731	2.5	-1	1	24	521	544	UACAAUCAUCGCCAACUUUCUUCC	::.:::::.:::: :::::	GUUUUAAGGUUGGUGAUGCUUGUA	Cleavage	1
Cluster_1343	UACAAUCAUCGCCAACUUUCUUCC	24	Medtr1g013730.1	| polygalacturonase/glycoside hydrolase family protein | HC | chr1:3280656-3277876 | 20130731	2.5	-1	1	24	612	634	UACAAUCAUCGCCAACUUUCUUCC	::::::: ::.::::::::::	AAUAGAAAGU-GGUGAUGAUUGUA	Cleavage	1
Cluster_1343	UACAAUCAUCGCCAACUUUCUUCC	24	Medtr4g101870.1	| transmembrane protein, putative | LC | chr4:42140561-42140965 | 20130731	2.5	-1	1	24	129	152	UACAAUCAUCGCCAACUUUCUUCC	:.: :: :::::::.::.::::.	UGGAAAAUGUUGGCGGUGGUUGUG	Cleavage	1
Cluster_1344	UUUGAGAUUCGUAGGAUUGUCUA	23	Medtr3g086530.7	| kinase AFC1 | HC | chr3:39206975-39212336 | 20130731	2.5	-1	1	23	575	597	UUUGAGAUUCGUAGGAUUGUCUA	.:::::::::: :.:::::	GCAUUAAUCCUACGAUUUUCAAA	Cleavage	1
Cluster_1346	CAAGAAUUAAAGGACGUAAUGUUU	24	Medtr7g101190.1	| major intrinsic protein (MIP) family transporter | HC | chr7:40836017-40834269 | 20130731	2.5	-1	1	24	1065	1088	CAAGAAUUAAAGGACGUAAUGUUU	:::.:: ::::::::.:::	UUGAUUUAUGUACUUUAAUUUUUG	Cleavage	1
Cluster_1346	CAAGAAUUAAAGGACGUAAUGUUU	24	Medtr6g078320.1	| UDP-glucosyltransferase family protein | HC | chr6:29398739-29402655 | 20130731	2.5	-1	1	24	690	713	CAAGAAUUAAAGGACGUAAUGUUU	:::::: ::::::.::::::	CUUCAUUACCUCCUUUGAUUCUUC	Cleavage	1
Cluster_1346	CAAGAAUUAAAGGACGUAAUGUUU	24	Medtr4g120760.1	| pathogenesis-related protein bet V I family protein | HC | chr4:50001780-49999676 | 20130731	2.5	-1	1	24	1000	1023	CAAGAAUUAAAGGACGUAAUGUUU	:. . :::. ::.:::.:::::::	AGUUUUUAUAUCUUUUGAUUCUUG	Cleavage	1
Cluster_1346	CAAGAAUUAAAGGACGUAAUGUUU	24	Medtr3g084030.3	| rhodanese/cell cycle control phosphatase superfamily protein | LC | chr3:37958414-37933056 | 20130731	2.5	-1	1	24	425	448	CAAGAAUUAAAGGACGUAAUGUUU	:: :::: ::..:::::::.:::	UAAAAUUAGGUUUUUUAAUUUUUG	Cleavage	1
Cluster_1346	CAAGAAUUAAAGGACGUAAUGUUU	24	Medtr3g084030.4	| rhodanese/cell cycle control phosphatase superfamily protein | LC | chr3:37958546-37933003 | 20130731	2.5	-1	1	24	557	580	CAAGAAUUAAAGGACGUAAUGUUU	:: :::: ::..:::::::.:::	UAAAAUUAGGUUUUUUAAUUUUUG	Cleavage	1
Cluster_1346	CAAGAAUUAAAGGACGUAAUGUUU	24	Medtr4g081655.2	| S-locus lectin kinase family protein | HC | chr4:31704660-31709511 | 20130731	2.5	-1	1	24	3082	3105	CAAGAAUUAAAGGACGUAAUGUUU	.:::..::.:::::::::::	UGUUAUUGUGUUCUUUAAUUCUUU	Cleavage	1
Cluster_1378	UUUUGCUUUGGGCUCAGCCU	20	Medtr3g093870.1	| tRNA-binding region domain protein | HC | chr3:42898812-42891568 | 20130731	2.5	-1	1	20	810	829	UUUUGCUUUGGGCUCAGCCU	:::: :: :::::::::::	CGGCUAAGGCCAAAGCAAAA	Cleavage	1
Cluster_1378	UUUUGCUUUGGGCUCAGCCU	20	Medtr2g091110.1	| frigida-LIKE protein | LC | chr2:39219498-39225164 | 20130731	2.5	-1	1	20	589	608	UUUUGCUUUGGGCUCAGCCU	:: .:::::.:::.::::::	AGCUUGAGCUCAAGGCAAAA	Cleavage	1
Cluster_1378	UUUUGCUUUGGGCUCAGCCU	20	Medtr7g080730.1	| superkiller viralicidic activity-like protein | HC | chr7:30721960-30732583 | 20130731	2.5	-1	1	20	2708	2727	UUUUGCUUUGGGCUCAGCCU	::: :::::.:::.::::.:	AGGAUGAGCUCAAGGCAAGA	Cleavage	1
Cluster_138	UUAACCAAUUGUUCCUACUGAGU	23	Medtr1g067220.1	| hypothetical protein | HC | chr1:28954457-28952853 | 20130731	2.5	-1	1	23	422	444	UUAACCAAUUGUUCCUACUGAGU	..: ::: :::: ::::::::::	GUUGAGUUGGAAAAAUUGGUUAA	Translation	1
Cluster_138	UUAACCAAUUGUUCCUACUGAGU	23	Medtr5g077740.1	| PLATZ transcription factor family protein, putative | HC | chr5:33179044-33181296 | 20130731	2.5	-1	1	23	710	732	UUAACCAAUUGUUCCUACUGAGU	.:: ::::.::::::::.:	UGGGGGUUGGAAUAAUUGGUUGA	Cleavage	1
Cluster_138	UUAACCAAUUGUUCCUACUGAGU	23	Medtr6g445430.1	| transmembrane protein, putative | LC | chr6:15831366-15831905 | 20130731	2.5	-1	1	23	105	127	UUAACCAAUUGUUCCUACUGAGU	: : :::::::::::::.:	AUGGAAUUGGAACAAUUGGUUGA	Cleavage	1
Cluster_138	UUAACCAAUUGUUCCUACUGAGU	23	Medtr3g070800.1	| Serine/Threonine-kinase CCR4-like protein | HC | chr3:31757287-31754455 | 20130731	2.5	-1	1	23	2128	2150	UUAACCAAUUGUUCCUACUGAGU	::: :::::::.:::::::	AAACAGCAGGAACAGUUGGUUAU	Cleavage	1
Cluster_138	UUAACCAAUUGUUCCUACUGAGU	23	Medtr1g021500.1	| plant-specific B3-DNA-binding domain protein | HC | chr1:6438573-6443179 | 20130731	2.5	-1	1	23	247	269	UUAACCAAUUGUUCCUACUGAGU	.::.::::::::: :::::	CAAGGGUGGGAACAAUUUGUUAA	Cleavage	1
Cluster_138	UUAACCAAUUGUUCCUACUGAGU	23	Medtr1g021500.2	| plant-specific B3-DNA-binding domain protein | HC | chr1:6438573-6442047 | 20130731	2.5	-1	1	23	247	269	UUAACCAAUUGUUCCUACUGAGU	.::.::::::::: :::::	CAAGGGUGGGAACAAUUUGUUAA	Cleavage	1
Cluster_1381	UGAACACAAGAAAAUUAGGGAUG	23	Medtr4g090890.1	| vacuolar protein sorting-associated protein VPS28, putative | HC | chr4:35950016-35952082 | 20130731	2.5	-1	1	23	1218	1240	UGAACACAAGAAAAUUAGGGAUG	.:::::::::.:::: ::.:	UUGUCCUAAUUUUUUUGUUUUUA	Cleavage	1
Cluster_1381	UGAACACAAGAAAAUUAGGGAUG	23	Medtr2g008430.1	| LL-diaminopimelate aminotransferase | HC | chr2:1471885-1475400 | 20130731	2.5	-1	1	23	638	660	UGAACACAAGAAAAUUAGGGAUG	::::::::::: ::::::	CACAACUAAUUUUCUUCUGUUCA	Cleavage	1
Cluster_1381	UGAACACAAGAAAAUUAGGGAUG	23	Medtr1g050352.1	| transmembrane protein, putative | LC | chr1:19267147-19266419 | 20130731	2.5	-1	1	23	309	331	UGAACACAAGAAAAUUAGGGAUG	:. :: :. ::::::::::::::	CGACCAUGCUUUUCUUGUGUUCA	Cleavage	1
Cluster_1381	UGAACACAAGAAAAUUAGGGAUG	23	Medtr8g020970.1	| linoleate 13S-lipoxygenase 2-1, related protein | HC | chr8:7443707-7436326 | 20130731	2.5	-1	1	23	46	68	UGAACACAAGAAAAUUAGGGAUG	.::: :::::::::::::	UUAAUCUACUUUUCUUGUGUUCU	Cleavage	1
Cluster_1381	UGAACACAAGAAAAUUAGGGAUG	23	Medtr0568s0010.2	| hypothetical protein | HC | scaffold0568:1305-2810 | 20130731	2.5	-1	1	23	539	561	UGAACACAAGAAAAUUAGGGAUG	..::..::::.::::::::.	AGGUUCUGGUUUUUUUGUGUUCG	Cleavage	1
Cluster_1381	UGAACACAAGAAAAUUAGGGAUG	23	Medtr8g089935.1	| signal transducer, putative | HC | chr8:37570969-37576081 | 20130731	2.5	-1	1	23	2237	2259	UGAACACAAGAAAAUUAGGGAUG	::.:: ::::::::::::..	GUGCCUUACUUUUCUUGUGUUUG	Cleavage	1
Cluster_1381	UGAACACAAGAAAAUUAGGGAUG	23	Medtr1g077210.1	| plant/F12B17-70 protein | HC | chr1:34457751-34462026 | 20130731	2.5	-1	1	23	590	612	UGAACACAAGAAAAUUAGGGAUG	.:.:..:::::::::::::	CUGUCUUGGUUUUCUUGUGUUCU	Cleavage	1
Cluster_1385	AAGGAUGCAUAAAAUUAGUUG	21	Medtr6g080560.1	| RNI superfamily protein, putative | LC | chr6:28935733-28934831 | 20130731	2.5	-1	1	21	863	883	AAGGAUGCAUAAAAUUAGUUG	:::.::::::::: :.:::	UCACUGAUUUUAUGCCUUCUU	Cleavage	1
Cluster_1387	UUGUUCUUAUAUUGUUUAGCCU	22	Medtr1g021320.2	| plant-specific B3-DNA-binding domain protein | LC | chr1:6356034-6363498 | 20130731	2.5	-1	1	22	1168	1189	UUGUUCUUAUAUUGUUUAGCCU	:: :::::::::.:::::	GAUCUUAACAAUAUAGGAACAC	Cleavage	1
Cluster_1387	UUGUUCUUAUAUUGUUUAGCCU	22	Medtr7g007780.3	| armadillo/beta-catenin repeat protein | HC | chr7:1672392-1663844 | 20130731	2.5	-1	1	22	1011	1032	UUGUUCUUAUAUUGUUUAGCCU	::::. :::::::::::::	CUGCUAGUAAAUAUAAGAACAA	Cleavage	1
Cluster_1387	UUGUUCUUAUAUUGUUUAGCCU	22	Medtr8g013640.4	| 4F5 family protein | HC | chr8:4172047-4169882 | 20130731	2.5	-1	1	22	562	583	UUGUUCUUAUAUUGUUUAGCCU	::::::::: ::::::..:	AAUCUAAACAAUCUAAGAAUGA	Translation	1
Cluster_1387	UUGUUCUUAUAUUGUUUAGCCU	22	Medtr4g064883.2	| enoyl-(acyl carrier) reductase | HC | chr4:24230216-24231447 | 20130731	2.5	-1	1	22	403	424	UUGUUCUUAUAUUGUUUAGCCU	::::::::.::.:.::::	CUUAUAAACAAUGUAGGGACAA	Cleavage	1
Cluster_1387	UUGUUCUUAUAUUGUUUAGCCU	22	Medtr6g046940.1	| hypothetical protein | HC | chr6:17001650-16992956 | 20130731	2.5	-1	1	22	1242	1263	UUGUUCUUAUAUUGUUUAGCCU	:: .:.:: ::::::.::::::	AGUUUGAAGAAUAUAGGAACAA	Cleavage	1
Cluster_1387	UUGUUCUUAUAUUGUUUAGCCU	22	Medtr4g043630.3	| disease resistance protein (TIR-NBS-LRR class) | HC | chr4:14639363-14633882 | 20130731	2.5	-1	1	22	1025	1046	UUGUUCUUAUAUUGUUUAGCCU	::: .::.::.:::::::::	GUGCUUGACGAUGUAAGAACAA	Cleavage	1
Cluster_1387	UUGUUCUUAUAUUGUUUAGCCU	22	Medtr4g095370.2	| prolyl 4-hydroxylase alpha-like protein | HC | chr4:39748395-39754014 | 20130731	2.5	-1	1	22	1018	1039	UUGUUCUUAUAUUGUUUAGCCU	::: :::::::::: ::::	GUUCUAUACAAUAUAAGCACAA	Cleavage	1
Cluster_1387	UUGUUCUUAUAUUGUUUAGCCU	22	Medtr7g118220.1	| component of oligomeric protein | HC | chr7:49069047-49065741 | 20130731	2.5	-1	1	22	1866	1887	UUGUUCUUAUAUUGUUUAGCCU	.::.:::.:.::.::::::	CUAUUAGACAGUGUAGGAACAA	Cleavage	1
Cluster_1387	UUGUUCUUAUAUUGUUUAGCCU	22	Medtr5g055370.1	| Nodule Cysteine-Rich (NCR) secreted peptide | HC | chr5:22802983-22802199 | 20130731	2.5	-1	1	22	569	590	UUGUUCUUAUAUUGUUUAGCCU	:::::.::::::: ::.::	GCACUAAAUAAUAUAAUAAUAA	Cleavage	1
Cluster_1387	UUGUUCUUAUAUUGUUUAGCCU	22	Medtr1g021320.1	| plant-specific B3-DNA-binding domain protein | LC | chr1:6356167-6363567 | 20130731	2.5	-1	1	22	1151	1172	UUGUUCUUAUAUUGUUUAGCCU	:: :::::::::.:::::	GAUCUUAACAAUAUAGGAACAC	Cleavage	1
Cluster_1387	UUGUUCUUAUAUUGUUUAGCCU	22	Medtr0005s0110.1	| disease resistance protein (TIR-NBS-LRR class) | HC | scaffold0005:178056-182859 | 20130731	2.5	-1	1	22	898	919	UUGUUCUUAUAUUGUUUAGCCU	::: .::.::.:::::::::	GUGCUUGACGAUGUAAGAACAA	Cleavage	1
Cluster_1387	UUGUUCUUAUAUUGUUUAGCCU	22	Medtr7g007780.2	| armadillo/beta-catenin repeat protein | HC | chr7:1672392-1659373 | 20130731	2.5	-1	1	22	1258	1279	UUGUUCUUAUAUUGUUUAGCCU	::::. :::::::::::::	CUGCUAGUAAAUAUAAGAACAA	Cleavage	1
Cluster_1387	UUGUUCUUAUAUUGUUUAGCCU	22	Medtr5g007040.1	| zinc knuckle (CCHC-type) family protein, putative | HC | chr5:1181132-1186024 | 20130731	2.5	-1	1	22	1298	1319	UUGUUCUUAUAUUGUUUAGCCU	:: .:.:: ::::::.::::::	AGUUUGAAGAAUAUAGGAACAA	Cleavage	1
Cluster_1387	UUGUUCUUAUAUUGUUUAGCCU	22	Medtr4g043630.2	| disease resistance protein (TIR-NBS-LRR class) | HC | chr4:14639363-14633882 | 20130731	2.5	-1	1	22	1025	1046	UUGUUCUUAUAUUGUUUAGCCU	::: .::.::.:::::::::	GUGCUUGACGAUGUAAGAACAA	Cleavage	1
Cluster_1387	UUGUUCUUAUAUUGUUUAGCCU	22	Medtr4g043630.1	| disease resistance protein (TIR-NBS-LRR class) | HC | chr4:14639336-14634064 | 20130731	2.5	-1	1	22	998	1019	UUGUUCUUAUAUUGUUUAGCCU	::: .::.::.:::::::::	GUGCUUGACGAUGUAAGAACAA	Cleavage	1
Cluster_1387	UUGUUCUUAUAUUGUUUAGCCU	22	Medtr7g007780.1	| armadillo/beta-catenin repeat protein | HC | chr7:1672392-1659373 | 20130731	2.5	-1	1	22	1011	1032	UUGUUCUUAUAUUGUUUAGCCU	::::. :::::::::::::	CUGCUAGUAAAUAUAAGAACAA	Cleavage	1
Cluster_1387	UUGUUCUUAUAUUGUUUAGCCU	22	Medtr5g094810.1	| multidrug resistance protein ABC transporter family protein | HC | chr5:41440786-41434607 | 20130731	2.5	-1	1	22	4394	4415	UUGUUCUUAUAUUGUUUAGCCU	:::::.: :::::::::.::	UUGCUAAGCUAUAUAAGAAUAA	Cleavage	1
Cluster_1387	UUGUUCUUAUAUUGUUUAGCCU	22	Medtr8g013640.2	| 4F5 family protein | HC | chr8:4172047-4169882 | 20130731	2.5	-1	1	22	418	439	UUGUUCUUAUAUUGUUUAGCCU	::::::::: ::::::..:	AAUCUAAACAAUCUAAGAAUGA	Translation	1
Cluster_1387	UUGUUCUUAUAUUGUUUAGCCU	22	Medtr8g013640.3	| 4F5 family protein | HC | chr8:4172047-4169886 | 20130731	2.5	-1	1	22	617	638	UUGUUCUUAUAUUGUUUAGCCU	::::::::: ::::::..:	AAUCUAAACAAUCUAAGAAUGA	Translation	1
Cluster_1387	UUGUUCUUAUAUUGUUUAGCCU	22	Medtr8g013640.1	| 4F5 family protein | HC | chr8:4172047-4170182 | 20130731	2.5	-1	1	22	455	476	UUGUUCUUAUAUUGUUUAGCCU	::::::::: ::::::..:	AAUCUAAACAAUCUAAGAAUGA	Translation	1
Cluster_1387	UUGUUCUUAUAUUGUUUAGCCU	22	Medtr4g064883.1	| enoyl-(acyl carrier) reductase | HC | chr4:24230207-24233800 | 20130731	2.5	-1	1	22	412	433	UUGUUCUUAUAUUGUUUAGCCU	::::::::.::.:.::::	CUUAUAAACAAUGUAGGGACAA	Cleavage	1
Cluster_1389	AGAAGCUUCGUCACGUGACG	20	Medtr6g042090.1	| hypothetical protein | LC | chr6:14536758-14529545 | 20130731	2.5	-1	1	20	28	47	AGAAGCUUCGUCACGUGACG	::.::::::::.::.:::	AGUUACGUGACGGAGUUUCG	Cleavage	1
Cluster_1389	AGAAGCUUCGUCACGUGACG	20	Medtr6g042090.3	| hypothetical protein | LC | chr6:14537553-14529879 | 20130731	2.5	-1	1	20	823	842	AGAAGCUUCGUCACGUGACG	::.::::::::.::.:::	AGUUACGUGACGGAGUUUCG	Cleavage	1
Cluster_1389	AGAAGCUUCGUCACGUGACG	20	Medtr6g042090.2	| hypothetical protein | LC | chr6:14537622-14533625 | 20130731	2.5	-1	1	20	892	911	AGAAGCUUCGUCACGUGACG	::.::::::::.::.:::	AGUUACGUGACGGAGUUUCG	Cleavage	1
Cluster_1389	AGAAGCUUCGUCACGUGACG	20	Medtr1g090807.1	| myosin heavy chain-like protein, putative | HC | chr1:40835835-40829429 | 20130731	2.5	-1	1	20	49	68	AGAAGCUUCGUCACGUGACG	.:::: :::::::::::: :	UGUCAAGUGACGAAGCUUAU	Cleavage	1
Cluster_1391	UCUGAAAUCAAAGAAUGUGUUCUU	24	Medtr3g029580.1	| RNA recognition motif, a.k.a. RRM, RBD protein | HC | chr3:9308768-9310458 | 20130731	2.5	-1	1	24	751	774	UCUGAAAUCAAAGAAUGUGUUCUU	: ::.:::.:: :::::::::	UCAAUCAUAUUUUUGGAUUUCAGA	Translation	1
Cluster_1391	UCUGAAAUCAAAGAAUGUGUUCUU	24	Medtr4g046870.1	| hypothetical protein | HC | chr4:16735844-16734083 | 20130731	2.5	-1	1	24	941	964	UCUGAAAUCAAAGAAUGUGUUCUU	: ::::::::::::.:::	AUUUGAAGAUUCUUUGAUUUUAGA	Cleavage	1
Cluster_1391	UCUGAAAUCAAAGAAUGUGUUCUU	24	Medtr3g029580.2	| RNA recognition motif, a.k.a. RRM, RBD protein | HC | chr3:9308768-9310458 | 20130731	2.5	-1	1	24	833	856	UCUGAAAUCAAAGAAUGUGUUCUU	: ::.:::.:: :::::::::	UCAAUCAUAUUUUUGGAUUUCAGA	Translation	1
Cluster_1391	UCUGAAAUCAAAGAAUGUGUUCUU	24	Medtr1g484960.1	| kinesin motor domain protein | HC | chr1:37843219-37826018 | 20130731	2.5	-1	1	24	2125	2148	UCUGAAAUCAAAGAAUGUGUUCUU	::.:.:::: :::::::::::	CGUAAUAUAUUCCUUGAUUUCAGA	Cleavage	1
Cluster_1400	UCGGAGGAUUGCCGAUGUUGAUCGU	25	Medtr1g093120.1	| 2OG-Fe(II) oxygenase family oxidoreductase | HC | chr1:33769567-33767782 | 20130731	2.5	-1	1	25	948	972	UCGGAGGAUUGCCGAUGUUGAUCGU	.: :::::::::.:::.::.:	GUAGUAAACAUCGGCGAUCUUCUGC	Cleavage	1
Cluster_1401	UCUUUUGAUUCAUGUAGGCUGGCCU	25	Medtr8g010160.1	| ABI3-interacting protein | HC | chr8:2588108-2583935 | 20130731	2.5	-1	1	25	511	535	UCUUUUGAUUCAUGUAGGCUGGCCU	::.: :::::::.:.::::	AGAGACGCUUUCAUGAAUUAGAAGA	Cleavage	1
Cluster_1401	UCUUUUGAUUCAUGUAGGCUGGCCU	25	Medtr4g063930.1	| kinase 1B | HC | chr4:23817421-23820878 | 20130731	2.5	-1	1	25	1250	1274	UCUUUUGAUUCAUGUAGGCUGGCCU	.::: :.::::::.:.::::	UUGAGGGCCAAUAUGAAUUAGAAGA	Cleavage	1
Cluster_1401	UCUUUUGAUUCAUGUAGGCUGGCCU	25	Medtr6g032770.1	| NAC transcription factor-like protein | HC | chr6:10318538-10315903 | 20130731	2.5	-1	1	25	1145	1169	UCUUUUGAUUCAUGUAGGCUGGCCU	:.::::::::::::..::	AAUUAUUCUUACAUGAAUCAAGGGA	Cleavage	1
Cluster_1401	UCUUUUGAUUCAUGUAGGCUGGCCU	25	Medtr6g078815.1	| transmembrane protein, putative | HC | chr6:29634014-29634995 | 20130731	2.5	-1	1	25	732	756	UCUUUUGAUUCAUGUAGGCUGGCCU	:. :::. :::::::::::::	GGAACGACCUGGAUGAAUCAAAAGA	Cleavage	1
Cluster_1402	CAACGGAUAUAGAUUCAAAAAUC	23	Medtr4g125820.2	| plant/F27B13-30 protein | HC | chr4:52239687-52228174 | 20130731	2.5	-1	1	23	3541	3563	CAACGGAUAUAGAUUCAAAAAUC	:::: : ::::::::.::::	UUGUUUUUAUUCUAUAUCUGUUG	Cleavage	1
Cluster_1402	CAACGGAUAUAGAUUCAAAAAUC	23	Medtr0242s0040.1	| F-box protein interaction domain protein | HC | scaffold0242:14764-13360 | 20130731	2.5	-1	1	23	1342	1364	CAACGGAUAUAGAUUCAAAAAUC	: :::::::::::.:.: :::	CUUGUUUGAAUCUAUGUUCAUUG	Cleavage	1
Cluster_1404	UAAUGGAACAUUGACUGCCUUGGCA	25	Medtr8g098435.1	| cytochrome P450 family 94 protein | HC | chr8:41066861-41064632 | 20130731	2.5	-1	1	25	746	770	UAAUGGAACAUUGACUGCCUUGGCA	:: ::::::::.::::.::: :	CAACAUGGCAGUCAGUGUUUCAUGA	Cleavage	1
Cluster_1404	UAAUGGAACAUUGACUGCCUUGGCA	25	Medtr1g102190.1	| Pti1-like kinase | HC | chr1:46147559-46145257 | 20130731	2.5	-1	1	25	708	732	UAAUGGAACAUUGACUGCCUUGGCA	:::::: ::::::::.::::	CAUAAAGGCAAGCAAUGUUCUAUUA	Cleavage	1
Cluster_1405	AAAACUGAUCACCAAGAUCUGCACC	25	Medtr5g081250.1	| folylpolyglutamate synthase | HC | chr5:34805635-34811083 | 20130731	2.5	-1	1	25	298	322	AAAACUGAUCACCAAGAUCUGCACC	::: : ::.::::::::::::::	GGUACCAAUUUUGGUGAUCAGUUUG	Cleavage	1
Cluster_1405	AAAACUGAUCACCAAGAUCUGCACC	25	Medtr6g007773.1	| calmodulin-binding protein | HC | chr6:1962324-1961294 | 20130731	2.5	-1	1	25	531	555	AAAACUGAUCACCAAGAUCUGCACC	: ::. ::: :::::::: ::::::	GUUGUUGAUGUUGGUGAUGAGUUUU	Cleavage	1
Cluster_1405	AAAACUGAUCACCAAGAUCUGCACC	25	Medtr5g081250.2	| folylpolyglutamate synthase | HC | chr5:34805635-34811083 | 20130731	2.5	-1	1	25	298	322	AAAACUGAUCACCAAGAUCUGCACC	::: : ::.::::::::::::::	GGUACCAAUUUUGGUGAUCAGUUUG	Cleavage	1
Cluster_1407	UCUACUUUCAUGGAGGACU	19	Medtr5g074790.1	| transmembrane protein, putative | LC | chr5:31776559-31772776 | 20130731	2.5	-1	1	19	579	597	UCUACUUUCAUGGAGGACU	: ::.:::::::.:::.::	AUUCUUCCAUGAGAGUGGA	Cleavage	1
Cluster_1426	UCAAAUUUUGAACAUCAGGCACCU	24	Medtr4g030040.1	| organic cation/carnitine transporter | HC | chr4:10377691-10379776 | 20130731	2.5	-1	1	24	1931	1954	UCAAAUUUUGAACAUCAGGCACCU	: ::: :::::::: ::::::	UUCUCCCUUAUGUUCAACAUUUGA	Cleavage	1
Cluster_1426	UCAAAUUUUGAACAUCAGGCACCU	24	Medtr4g121070.1	| tyrosyl-tRNA synthetase | HC | chr4:50128516-50126504 | 20130731	2.5	-1	1	24	441	464	UCAAAUUUUGAACAUCAGGCACCU	::.::::::::::: ::::.	CUCAGCUUGAUGUUCAAACUUUGG	Cleavage	1
Cluster_1426	UCAAAUUUUGAACAUCAGGCACCU	24	Medtr8g086290.1	| MADS-box transcription factor family protein | LC | chr8:35781930-35782463 | 20130731	2.5	-1	1	24	353	376	UCAAAUUUUGAACAUCAGGCACCU	:::::::: :::::::::	AACUUGCUGAUGUUGAAAAUUUGA	Translation	1
Cluster_1426	UCAAAUUUUGAACAUCAGGCACCU	24	Medtr4g030040.2	| organic cation/carnitine transporter | HC | chr4:10376992-10379776 | 20130731	2.5	-1	1	24	1938	1961	UCAAAUUUUGAACAUCAGGCACCU	: ::: :::::::: ::::::	UUCUCCCUUAUGUUCAACAUUUGA	Cleavage	1
Cluster_1426	UCAAAUUUUGAACAUCAGGCACCU	24	Medtr7g024480.1	| transmembrane protein, putative | HC | chr7:8057325-8058800 | 20130731	2.5	-1	1	24	169	191	UCAAAUUUUGAACAUCAGGCACCU	:::.::: :::::::::::::	GCAUGCUUGA-GUUCAAAAUUUGA	Cleavage	1
Cluster_1426	UCAAAUUUUGAACAUCAGGCACCU	24	Medtr7g024480.2	| transmembrane protein, putative | HC | chr7:8057226-8058800 | 20130731	2.5	-1	1	24	268	290	UCAAAUUUUGAACAUCAGGCACCU	:::.::: :::::::::::::	GCAUGCUUGA-GUUCAAAAUUUGA	Cleavage	1
Cluster_143	UCGCGUCAAUUUGGAAAUG	19	Medtr2g058990.1	| pentatricopeptide (PPR) repeat protein | HC | chr2:24361845-24364937 | 20130731	2.5	-1	1	19	396	414	UCGCGUCAAUUUGGAAAUG	:::::::::: :::::.:.	CAUUUCCAAAAUGACGUGG	Cleavage	1
Cluster_143	UCGCGUCAAUUUGGAAAUG	19	Medtr8g072950.1	| plant intracellular ras group-related LRR protein | HC | chr8:30842070-30845388 | 20130731	2.5	-1	1	19	990	1008	UCGCGUCAAUUUGGAAAUG	:::::::::::.:::::	UCUUUCCAAAUUGGCGCGA	Cleavage	1
Cluster_1431	UAAAAGUUUUUCAACCUUAGGUGCU	25	Medtr5g063080.1	| trehalose-6-phosphate phosphatase | HC | chr5:26144803-26142024 | 20130731	2.5	-1	1	25	1167	1191	UAAAAGUUUUUCAACCUUAGGUGCU	::.::.::::::.:.::.::::.	UCCAUCUGAGGUUGGAGAAUUUUUG	Cleavage	1
Cluster_1431	UAAAAGUUUUUCAACCUUAGGUGCU	25	Medtr1g097935.1	| chalcone and stilbene synthase family protein | HC | chr1:44140688-44142315 | 20130731	2.5	-1	1	25	1324	1348	UAAAAGUUUUUCAACCUUAGGUGCU	.:. :::::::::::::::: :	UUUAUGUAAGGUUGAAAAACUUGUC	Cleavage	1
Cluster_1431	UAAAAGUUUUUCAACCUUAGGUGCU	25	Medtr8g030737.1	| hypothetical protein | HC | chr8:11402944-11402677 | 20130731	2.5	-1	1	25	21	45	UAAAAGUUUUUCAACCUUAGGUGCU	:: . . .:::::::..::::::::	AGAGGUAGAGGUUGAGGAACUUUUA	Cleavage	1
Cluster_1432	UUUCAAGUUCAGGAUAAGGCUGCU	24	Medtr7g094350.1	| SCF ubiquitin ligase, SKP1 component | LC | chr7:37557357-37557950 | 20130731	2.5	-1	1	24	127	150	UUUCAAGUUCAGGAUAAGGCUGCU	.: ::::::.:::::: ::::.	GAUAUCCUUAUUCUGAACGUGAAG	Cleavage	1
Cluster_1432	UUUCAAGUUCAGGAUAAGGCUGCU	24	Medtr8g036270.1	| molybdopterin biosynthesis protein MoaE | HC | chr8:13437335-13432180 | 20130731	2.5	-1	1	24	522	545	UUUCAAGUUCAGGAUAAGGCUGCU	: ::..:::::.:::.::::::.	UGGAGUUUUAUCUUGAGCUUGAAG	Cleavage	1
Cluster_1432	UUUCAAGUUCAGGAUAAGGCUGCU	24	Medtr3g112410.1	| thioredoxin H-type 1 protein | HC | chr3:52668561-52666226 | 20130731	2.5	-1	1	24	872	895	UUUCAAGUUCAGGAUAAGGCUGCU	.::::: .:::::::::::	AAUUUUCUUAUAUUGAACUUGAAA	Cleavage	1
Cluster_1432	UUUCAAGUUCAGGAUAAGGCUGCU	24	Medtr2g043390.1	| hypothetical protein | LC | chr2:18899735-18902211 | 20130731	2.5	-1	1	24	158	181	UUUCAAGUUCAGGAUAAGGCUGCU	:..: ::::::::::::::.	CAUUGUUUAAUCCUGAACUUGAAG	Cleavage	1
Cluster_1432	UUUCAAGUUCAGGAUAAGGCUGCU	24	Medtr5g097680.1	| F-box protein interaction domain protein | LC | chr5:42782215-42783501 | 20130731	2.5	-1	1	24	848	871	UUUCAAGUUCAGGAUAAGGCUGCU	::: .:: ::.:::::.::::::	UGCAUUCUGAUUCUGAAUUUGAAA	Cleavage	1
Cluster_1432	UUUCAAGUUCAGGAUAAGGCUGCU	24	Medtr8g064490.1	| 23S rRNA m2A2503 methyltransferase | HC | chr8:27050679-27043455 | 20130731	2.5	-1	1	24	991	1014	UUUCAAGUUCAGGAUAAGGCUGCU	: :::: .::::::::::::	GGAUGACUUACUCUGAACUUGAAA	Cleavage	1
Cluster_1432	UUUCAAGUUCAGGAUAAGGCUGCU	24	Medtr6g004220.1	| MATE efflux family protein | HC | chr6:182487-185790 | 20130731	2.5	-1	1	24	830	853	UUUCAAGUUCAGGAUAAGGCUGCU	::: ::::: :::::::::	UUUUACCUAAUCCUCAACUUGAAA	Translation	1
Cluster_1432	UUUCAAGUUCAGGAUAAGGCUGCU	24	Medtr8g036270.4	| molybdopterin biosynthesis protein MoaE | HC | chr8:13437335-13432180 | 20130731	2.5	-1	1	24	522	545	UUUCAAGUUCAGGAUAAGGCUGCU	: ::..:::::.:::.::::::.	UGGAGUUUUAUCUUGAGCUUGAAG	Cleavage	1
Cluster_144	UAUAUAUCUGUUACUUCAUAUGCA	24	Medtr6g013960.1	| UDP-glucosyltransferase family protein | HC | chr6:4482443-4480690 | 20130731	2.5	-1	1	24	654	677	UAUAUAUCUGUUACUUCAUAUGCA	: :::::::.::::::: ::.	UAAAAAUGAAGUGACAGAUAAAUG	Cleavage	1
Cluster_144	UAUAUAUCUGUUACUUCAUAUGCA	24	Medtr7g078770.1	| disease resistance protein (TIR-NBS-LRR class), putative | LC | chr7:29821467-29816990 | 20130731	2.5	-1	1	24	1377	1400	UAUAUAUCUGUUACUUCAUAUGCA	.: :: ::::::.::::::::	GAUAGAUAAAGUAAUAGAUAUAUU	Cleavage	1
Cluster_144	UAUAUAUCUGUUACUUCAUAUGCA	24	Medtr3g109950.1	| sulfite exporter TauE/SafE family protein | HC | chr3:50746552-50751238 | 20130731	2.5	-1	1	24	43	66	UAUAUAUCUGUUACUUCAUAUGCA	: : ::::::: :::::::::	CAGAGACGAAGUAAGAGAUAUAUA	Translation	1
Cluster_144	UAUAUAUCUGUUACUUCAUAUGCA	24	Medtr7g093390.3	| zinc finger, C3HC4 type (RING finger) protein | HC | chr7:37118841-37121989 | 20130731	2.5	-1	1	24	2307	2330	UAUAUAUCUGUUACUUCAUAUGCA	: .: :: :::::.:::::::::	UAUAGAUAAAGUAGCAGAUAUAUU	Cleavage	1
Cluster_144	UAUAUAUCUGUUACUUCAUAUGCA	24	Medtr3g109950.3	| sulfite exporter TauE/SafE family protein | HC | chr3:50746552-50751238 | 20130731	2.5	-1	1	24	43	66	UAUAUAUCUGUUACUUCAUAUGCA	: : ::::::: :::::::::	CAGAGACGAAGUAAGAGAUAUAUA	Translation	1
Cluster_144	UAUAUAUCUGUUACUUCAUAUGCA	24	Medtr3g115620.1	| wuschel-related homeobox protein | HC | chr3:54113734-54116409 | 20130731	2.5	-1	1	24	861	884	UAUAUAUCUGUUACUUCAUAUGCA	:::::::..:: :::::::	CACUAAUGAAGUGGCAUAUAUAUA	Cleavage	1
Cluster_144	UAUAUAUCUGUUACUUCAUAUGCA	24	Medtr3g109950.2	| sulfite exporter TauE/SafE family protein | HC | chr3:50746552-50751238 | 20130731	2.5	-1	1	24	43	66	UAUAUAUCUGUUACUUCAUAUGCA	: : ::::::: :::::::::	CAGAGACGAAGUAAGAGAUAUAUA	Translation	1
Cluster_144	UAUAUAUCUGUUACUUCAUAUGCA	24	Medtr7g093390.1	| zinc finger, C3HC4 type (RING finger) protein | HC | chr7:37118817-37121936 | 20130731	2.5	-1	1	24	2724	2747	UAUAUAUCUGUUACUUCAUAUGCA	: .: :: :::::.:::::::::	UAUAGAUAAAGUAGCAGAUAUAUU	Cleavage	1
Cluster_1449	UCACUCCUUGUUGACCUGACUU	22	Medtr7g096690.1	| RING-H2 zinc finger protein | HC | chr7:38807386-38806219 | 20130731	2.5	-1	1	22	1131	1152	UCACUCCUUGUUGACCUGACUU	:::.: ::::..:::::::::	CAGUUAUGUCAGUAAGGAGUGA	Cleavage	1
Cluster_1449	UCACUCCUUGUUGACCUGACUU	22	Medtr5g033190.1	| armadillo repeat only protein | HC | chr5:14303776-14306487 | 20130731	2.5	-1	1	22	1102	1123	UCACUCCUUGUUGACCUGACUU	::::::.::.::::::: :	UUUUCAGGUUAAUAAGGAGUUA	Cleavage	1
Cluster_1453	UAAUUACAACGUACAGAAGGAUGU	24	Medtr3g071740.1	| polyketide cyclase/dehydrase and lipid transporter | HC | chr3:32207556-32206159 | 20130731	2.5	-1	1	24	1033	1056	UAAUUACAACGUACAGAAGGAUGU	:: :: .::::::::::::::	UGAUACUAUUGUACGUUGUAAUUU	Cleavage	1
Cluster_1453	UAAUUACAACGUACAGAAGGAUGU	24	Medtr7g106330.1	| BTB/POZ domain plant-like protein | HC | chr7:43251246-43248202 | 20130731	2.5	-1	1	24	478	501	UAAUUACAACGUACAGAAGGAUGU	::::: ::::::::..::.	UUCGACUUCUCUACGUUGUGGUUG	Cleavage	1
Cluster_1453	UAAUUACAACGUACAGAAGGAUGU	24	Medtr2g068650.1	| malectin/receptor-like kinase family protein | HC | chr2:28485336-28488560 | 20130731	2.5	-1	1	24	2220	2243	UAAUUACAACGUACAGAAGGAUGU	..:: ::::::: ::::::::::	GUAUGGUUCUGUAAGUUGUAAUUA	Translation	1
Cluster_1453	UAAUUACAACGUACAGAAGGAUGU	24	Medtr7g106330.3	| BTB/POZ domain plant-like protein | HC | chr7:43251237-43248215 | 20130731	2.5	-1	1	24	560	583	UAAUUACAACGUACAGAAGGAUGU	::::: ::::::::..::.	UUCGACUUCUCUACGUUGUGGUUG	Cleavage	1
Cluster_1454	UUGAGAUGAUUAUAUUAAGGAU	22	Medtr4g125690.1	| DIL domain myosin family protein | HC | chr4:52158700-52143640 | 20130731	2.5	-1	1	22	5445	5466	UUGAGAUGAUUAUAUUAAGGAU	.:::::::: :::::::..:	UCUCUUAAUAUUAUCAUCUUGA	Translation	1
Cluster_1454	UUGAGAUGAUUAUAUUAAGGAU	22	Medtr6g069830.1	| hypothetical protein | HC | chr6:25188033-25189488 | 20130731	2.5	-1	1	22	102	123	UUGAGAUGAUUAUAUUAAGGAU	::::::::::::.::::	AGCAAUAAUAUAAUCAUUUCAA	Cleavage	1
Cluster_1454	UUGAGAUGAUUAUAUUAAGGAU	22	Medtr4g130530.2	| translation initiation factor IF-3 | HC | chr4:54393562-54389216 | 20130731	2.5	-1	1	22	877	898	UUGAGAUGAUUAUAUUAAGGAU	.::::::::::::::: ::	CCUCUUAAUAUAAUCAUCACAU	Cleavage	1
Cluster_1454	UUGAGAUGAUUAUAUUAAGGAU	22	Medtr7g017820.1	| translation initiation factor IF-3, putative | HC | chr7:5728040-5729127 | 20130731	2.5	-1	1	22	345	366	UUGAGAUGAUUAUAUUAAGGAU	.::::::::::::::: ::	CCUCUUAAUAUAAUCAUCACAU	Cleavage	1
Cluster_1455	UUAGUAGAACUAACCCAAUCUAUA	24	Medtr4g128220.3	| syntaxin/T-SNARE family protein | HC | chr4:53368704-53364832 | 20130731	2.5	-1	1	24	798	821	UUAGUAGAACUAACCCAAUCUAUA	.::::: :.::::::::::	UUACCGUUGGGAUGGUUCUACUAA	Cleavage	1
Cluster_1455	UUAGUAGAACUAACCCAAUCUAUA	24	Medtr8g005265.1	| DUF247 domain protein | HC | chr8:141738-143859 | 20130731	2.5	-1	1	24	763	786	UUAGUAGAACUAACCCAAUCUAUA	: :::: :::::::.::.:.:	GGAAAAUUGUGUUAGUUUUAUUGA	Cleavage	1
Cluster_1455	UUAGUAGAACUAACCCAAUCUAUA	24	Medtr4g128220.7	| syntaxin/T-SNARE family protein | HC | chr4:53368704-53364832 | 20130731	2.5	-1	1	24	798	821	UUAGUAGAACUAACCCAAUCUAUA	.::::: :.::::::::::	UUACCGUUGGGAUGGUUCUACUAA	Cleavage	1
Cluster_1455	UUAGUAGAACUAACCCAAUCUAUA	24	Medtr8g093850.2	| hypothetical protein | HC | chr8:39269366-39266426 | 20130731	2.5	-1	1	24	487	510	UUAGUAGAACUAACCCAAUCUAUA	::: : :::::::::.::::	CUCUGAUGGUGUUAGUUCUGCUAA	Cleavage	1
Cluster_1455	UUAGUAGAACUAACCCAAUCUAUA	24	Medtr4g128220.5	| syntaxin/T-SNARE family protein | HC | chr4:53368706-53364832 | 20130731	2.5	-1	1	24	800	823	UUAGUAGAACUAACCCAAUCUAUA	.::::: :.::::::::::	UUACCGUUGGGAUGGUUCUACUAA	Cleavage	1
Cluster_1455	UUAGUAGAACUAACCCAAUCUAUA	24	Medtr4g128220.2	| syntaxin/T-SNARE family protein | HC | chr4:53368706-53364832 | 20130731	2.5	-1	1	24	800	823	UUAGUAGAACUAACCCAAUCUAUA	.::::: :.::::::::::	UUACCGUUGGGAUGGUUCUACUAA	Cleavage	1
Cluster_1455	UUAGUAGAACUAACCCAAUCUAUA	24	Medtr4g128220.4	| syntaxin/T-SNARE family protein | HC | chr4:53368706-53364832 | 20130731	2.5	-1	1	24	800	823	UUAGUAGAACUAACCCAAUCUAUA	.::::: :.::::::::::	UUACCGUUGGGAUGGUUCUACUAA	Cleavage	1
Cluster_1455	UUAGUAGAACUAACCCAAUCUAUA	24	Medtr4g128220.6	| syntaxin/T-SNARE family protein | HC | chr4:53368706-53364832 | 20130731	2.5	-1	1	24	800	823	UUAGUAGAACUAACCCAAUCUAUA	.::::: :.::::::::::	UUACCGUUGGGAUGGUUCUACUAA	Cleavage	1
Cluster_1455	UUAGUAGAACUAACCCAAUCUAUA	24	Medtr8g093850.3	| hypothetical protein | HC | chr8:39269366-39266426 | 20130731	2.5	-1	1	24	487	510	UUAGUAGAACUAACCCAAUCUAUA	::: : :::::::::.::::	CUCUGAUGGUGUUAGUUCUGCUAA	Cleavage	1
Cluster_1455	UUAGUAGAACUAACCCAAUCUAUA	24	Medtr8g093850.1	| hypothetical protein | HC | chr8:39269366-39266426 | 20130731	2.5	-1	1	24	405	428	UUAGUAGAACUAACCCAAUCUAUA	::: : :::::::::.::::	CUCUGAUGGUGUUAGUUCUGCUAA	Cleavage	1
Cluster_1455	UUAGUAGAACUAACCCAAUCUAUA	24	Medtr4g128220.8	| syntaxin/T-SNARE family protein | HC | chr4:53368706-53364832 | 20130731	2.5	-1	1	24	800	823	UUAGUAGAACUAACCCAAUCUAUA	.::::: :.::::::::::	UUACCGUUGGGAUGGUUCUACUAA	Cleavage	1
Cluster_1455	UUAGUAGAACUAACCCAAUCUAUA	24	Medtr4g128220.1	| syntaxin/T-SNARE family protein | HC | chr4:53368706-53364832 | 20130731	2.5	-1	1	24	800	823	UUAGUAGAACUAACCCAAUCUAUA	.::::: :.::::::::::	UUACCGUUGGGAUGGUUCUACUAA	Cleavage	1
Cluster_1456	GUUCAGGUCCAGGACUUAAGGAC	23	Medtr5g007740.1	| chalcone and stilbene synthase family protein | HC | chr5:1499142-1500122 | 20130731	2.5	-1	1	23	918	940	GUUCAGGUCCAGGACUUAAGGAC	:. ::::: ..::::::::.::	AUUGUUAAGCUUUGGACCUGGAC	Cleavage	1
Cluster_1456	GUUCAGGUCCAGGACUUAAGGAC	23	Medtr7g071385.1	| Nodule Cysteine-Rich (NCR) secreted peptide | HC | chr7:26447578-26448198 | 20130731	2.5	-1	1	23	361	383	GUUCAGGUCCAGGACUUAAGGAC	::.::::::::..:::::	AUAUGUAGGUCCUGGAUUUGAAC	Cleavage	1
Cluster_1460	UAAGGACAGGACUGCGCACAUGCC	24	Medtr6g027180.2	| RNA polymerase II-binding domain protein | HC | chr6:9202019-9212786 | 20130731	2.5	-1	1	24	2735	2758	UAAGGACAGGACUGCGCACAUGCC	::::::.:..:::::::.:::.	UUCAUGUGUGUGGUCCUGUUCUUG	Cleavage	1
Cluster_1460	UAAGGACAGGACUGCGCACAUGCC	24	Medtr6g027180.1	| RNA polymerase II-binding domain protein | HC | chr6:9201234-9212785 | 20130731	2.5	-1	1	24	2057	2080	UAAGGACAGGACUGCGCACAUGCC	::::::.:..:::::::.:::.	UUCAUGUGUGUGGUCCUGUUCUUG	Cleavage	1
Cluster_1463	UAAGGACAGGACUGCGCACAUGCC	24	Medtr6g027180.1	| RNA polymerase II-binding domain protein | HC | chr6:9201234-9212785 | 20130731	2.5	-1	1	24	2057	2080	UAAGGACAGGACUGCGCACAUGCC	::::::.:..:::::::.:::.	UUCAUGUGUGUGGUCCUGUUCUUG	Cleavage	1
Cluster_1463	UAAGGACAGGACUGCGCACAUGCC	24	Medtr6g027180.2	| RNA polymerase II-binding domain protein | HC | chr6:9202019-9212786 | 20130731	2.5	-1	1	24	2735	2758	UAAGGACAGGACUGCGCACAUGCC	::::::.:..:::::::.:::.	UUCAUGUGUGUGGUCCUGUUCUUG	Cleavage	1
Cluster_1484	UUAUUAAUGUCCAAAUCUGUUCUU	24	Medtr8g079250.3	| heavy metal P-type ATPase | HC | chr8:33897975-33903943 | 20130731	2.5	-1	1	24	963	986	UUAUUAAUGUCCAAAUCUGUUCUU	:. :::: :::: :::::::::::	AGAAACAUAUUUAGACAUUAAUAA	Cleavage	1
Cluster_1484	UUAUUAAUGUCCAAAUCUGUUCUU	24	Medtr6g077800.1	| pentatricopeptide (PPR) repeat protein | LC | chr6:29212418-29210681 | 20130731	2.5	-1	1	24	1669	1692	UUAUUAAUGUCCAAAUCUGUUCUU	.::::::::::..:::.::	AUCUGCAGAUUUGGAUGUUAGUAU	Cleavage	1
Cluster_1484	UUAUUAAUGUCCAAAUCUGUUCUU	24	Medtr0015s0120.1	| hypothetical protein | LC | scaffold0015:54830-52244 | 20130731	2.5	-1	1	24	558	581	UUAUUAAUGUCCAAAUCUGUUCUU	.::::: ::::: :::::::	GCUUGCAGAUCUGGACUUUAAUAA	Cleavage	1
Cluster_1484	UUAUUAAUGUCCAAAUCUGUUCUU	24	Medtr8g079250.4	| heavy metal P-type ATPase | HC | chr8:33897975-33903943 | 20130731	2.5	-1	1	24	963	986	UUAUUAAUGUCCAAAUCUGUUCUU	:. :::: :::: :::::::::::	AGAAACAUAUUUAGACAUUAAUAA	Cleavage	1
Cluster_1484	UUAUUAAUGUCCAAAUCUGUUCUU	24	Medtr8g079250.1	| heavy metal P-type ATPase | HC | chr8:33897975-33903943 | 20130731	2.5	-1	1	24	963	986	UUAUUAAUGUCCAAAUCUGUUCUU	:. :::: :::: :::::::::::	AGAAACAUAUUUAGACAUUAAUAA	Cleavage	1
Cluster_1484	UUAUUAAUGUCCAAAUCUGUUCUU	24	Medtr8g079250.2	| heavy metal P-type ATPase | HC | chr8:33897975-33903943 | 20130731	2.5	-1	1	24	963	986	UUAUUAAUGUCCAAAUCUGUUCUU	:. :::: :::: :::::::::::	AGAAACAUAUUUAGACAUUAAUAA	Cleavage	1
Cluster_1485	UGAUGGAAAGCUUUGGCCU	19	Medtr8g091310.1	| glycoside hydrolase family 5 protein | HC | chr8:38090191-38086958 | 20130731	2.5	-1	1	19	278	296	UGAUGGAAAGCUUUGGCCU	.: ::::::::::::::..	GGACCAAAGCUUUCCAUUG	Cleavage	1
Cluster_1485	UGAUGGAAAGCUUUGGCCU	19	Medtr6g477680.1	| DNA replication factor CDT1-like protein | LC | chr6:28503683-28499439 | 20130731	2.5	-1	1	19	704	722	UGAUGGAAAGCUUUGGCCU	:: .::.::::::.:::::	AGUUCAGAGCUUUUCAUCA	Cleavage	1
Cluster_1485	UGAUGGAAAGCUUUGGCCU	19	Medtr4g091890.1	| benzoquinone reductase | HC | chr4:36455350-36455793 | 20130731	2.5	-1	1	19	284	302	UGAUGGAAAGCUUUGGCCU	:::. :::::::::::::	UGGCUCAAGCUUUCCAUCA	Cleavage	1
Cluster_1485	UGAUGGAAAGCUUUGGCCU	19	Medtr2g011080.2	| NAD(P)H:quinone oxidoreductase, type IV protein | HC | chr2:2646197-2643852 | 20130731	2.5	-1	1	19	616	634	UGAUGGAAAGCUUUGGCCU	:::. :::::::::::::	UGGCUCAAGCUUUCCAUCA	Cleavage	1
Cluster_1485	UGAUGGAAAGCUUUGGCCU	19	Medtr2g011080.1	| NAD(P)H:quinone oxidoreductase, type IV protein | HC | chr2:2646354-2643605 | 20130731	2.5	-1	1	19	620	638	UGAUGGAAAGCUUUGGCCU	:::. :::::::::::::	UGGCUCAAGCUUUCCAUCA	Cleavage	1
Cluster_1485	UGAUGGAAAGCUUUGGCCU	19	Medtr6g077680.2	| DNA replication factor CDT1-like protein | LC | chr6:29816326-29811403 | 20130731	2.5	-1	1	19	939	957	UGAUGGAAAGCUUUGGCCU	:: .::.::::::.:::::	AGUUCAGAGCUUUUCAUCA	Cleavage	1
Cluster_1485	UGAUGGAAAGCUUUGGCCU	19	Medtr3g449240.1	| LRR receptor-like kinase family protein | LC | chr3:16676374-16679094 | 20130731	2.5	-1	1	19	1131	1149	UGAUGGAAAGCUUUGGCCU	::::: :: ::::::::::	AGGCCCAAACUUUCCAUCA	Translation	1
Cluster_1485	UGAUGGAAAGCUUUGGCCU	19	Medtr6g077680.1	| DNA replication factor CDT1-like protein | LC | chr6:29816274-29809922 | 20130731	2.5	-1	1	19	799	817	UGAUGGAAAGCUUUGGCCU	:: .::.::::::.:::::	AGUUCAGAGCUUUUCAUCA	Cleavage	1
Cluster_1485	UGAUGGAAAGCUUUGGCCU	19	Medtr2g011080.3	| NAD(P)H:quinone oxidoreductase, type IV protein | HC | chr2:2646318-2643821 | 20130731	2.5	-1	1	19	916	934	UGAUGGAAAGCUUUGGCCU	:::. :::::::::::::	UGGCUCAAGCUUUCCAUCA	Cleavage	1
Cluster_1486	UAAAAGUAAUGAGUCUUUGAGCCU	24	Medtr5g091690.1	| hypothetical protein | HC | chr5:40005134-40006128 | 20130731	2.5	-1	1	24	821	844	UAAAAGUAAUGAGUCUUUGAGCCU	.::: :::::::::: :::::	UUUUUCAUAGACUCAUUAGUUUUA	Cleavage	1
Cluster_1486	UAAAAGUAAUGAGUCUUUGAGCCU	24	Medtr7g071720.4	| Nodule Cysteine-Rich (NCR) secreted peptide | HC | chr7:26584358-26585059 | 20130731	2.5	-1	1	24	201	224	UAAAAGUAAUGAGUCUUUGAGCCU	:::: :.:..:::::::::	UGAUACAAAAAUUUGUUACUUUUA	Cleavage	1
Cluster_1486	UAAAAGUAAUGAGUCUUUGAGCCU	24	Medtr8g010080.1	| polygalacturonase | LC | chr8:2548763-2551323 | 20130731	2.5	-1	1	22	1	22	UAAAAGUAAUGAGUCUUUGAGC	:::.:..::.::::::::.	AUGCAAGGGUUCGUUACUUUUG	Cleavage	1
Cluster_1486	UAAAAGUAAUGAGUCUUUGAGCCU	24	Medtr7g071720.3	| Nodule Cysteine-Rich (NCR) secreted peptide | HC | chr7:26584335-26585013 | 20130731	2.5	-1	1	24	230	253	UAAAAGUAAUGAGUCUUUGAGCCU	:::: :.:..:::::::::	UGAUACAAAAAUUUGUUACUUUUA	Cleavage	1
Cluster_1486	UAAAAGUAAUGAGUCUUUGAGCCU	24	Medtr2g086020.1	| FBD protein | LC | chr2:36161521-36162936 | 20130731	2.5	-1	1	24	429	452	UAAAAGUAAUGAGUCUUUGAGCCU	:: :::.:::::::::::	CACGCCACAGAUUCAUUACUUUUC	Cleavage	1
Cluster_1486	UAAAAGUAAUGAGUCUUUGAGCCU	24	Medtr3g075510.2	| raffinose synthase or seed inhibition protein | HC | chr3:34386505-34382026 | 20130731	2.5	-1	1	24	3149	3172	UAAAAGUAAUGAGUCUUUGAGCCU	.:::::::.::::: .:::::	AAAUUCAAAGAUUCAUUCUUUUUA	Cleavage	1
Cluster_1486	UAAAAGUAAUGAGUCUUUGAGCCU	24	Medtr3g075510.3	| raffinose synthase or seed inhibition protein | HC | chr3:34386505-34382054 | 20130731	2.5	-1	1	24	3249	3272	UAAAAGUAAUGAGUCUUUGAGCCU	.:::::::.::::: .:::::	AAAUUCAAAGAUUCAUUCUUUUUA	Cleavage	1
Cluster_1486	UAAAAGUAAUGAGUCUUUGAGCCU	24	Medtr3g075510.1	| raffinose synthase or seed inhibition protein | HC | chr3:34386505-34382026 | 20130731	2.5	-1	1	24	2849	2872	UAAAAGUAAUGAGUCUUUGAGCCU	.:::::::.::::: .:::::	AAAUUCAAAGAUUCAUUCUUUUUA	Cleavage	1
Cluster_1486	UAAAAGUAAUGAGUCUUUGAGCCU	24	Medtr4g082900.1	| hypothetical protein | HC | chr4:32229285-32230037 | 20130731	2.5	-1	1	24	88	111	UAAAAGUAAUGAGUCUUUGAGCCU	.::: : :.::::::::::::	AAAUUCAUAUAUUCAUUACUUUUA	Cleavage	1
Cluster_1486	UAAAAGUAAUGAGUCUUUGAGCCU	24	Medtr7g083660.1	| nodulin-like/MFS transporter | HC | chr7:32206526-32211403 | 20130731	2.5	-1	1	24	622	645	UAAAAGUAAUGAGUCUUUGAGCCU	.::::::::::::::::::	UCAUUCAAAGACUCAUUACUUUGC	Cleavage	1
Cluster_1488	UCAGAUAAUCCGGAUAGAAACCG	23	Medtr3g049990.1	| DEAD-box ATP-dependent RNA helicase | HC | chr3:19680414-19670656 | 20130731	2.5	-1	1	23	1346	1368	UCAGAUAAUCCGGAUAGAAACCG	:: :: :::..::::::::::.	AGGAUUAUAUUUGGAUUAUCUGG	Cleavage	1
Cluster_1488	UCAGAUAAUCCGGAUAGAAACCG	23	Medtr1g115950.1	| hypothetical protein | HC | chr1:52395851-52389745 | 20130731	2.5	-1	1	23	773	794	UCAGAUAAUCCGGAUAGAAACCG	::::. :::::::::::::	CCAGUUCUG-CCGGAUUAUCUGA	Cleavage	1
Cluster_1488	UCAGAUAAUCCGGAUAGAAACCG	23	Medtr4g109040.2	| actin-binding FH2 (formin-like) protein | LC | chr4:45215879-45203395 | 20130731	2.5	-1	1	23	1252	1274	UCAGAUAAUCCGGAUAGAAACCG	:: ::::.:::::.:.:::	ACCCUUGUAUCUGGAUUGUUUGA	Cleavage	1
Cluster_1488	UCAGAUAAUCCGGAUAGAAACCG	23	Medtr4g109040.1	| actin-binding FH2 (formin-like) protein | LC | chr4:45215879-45203395 | 20130731	2.5	-1	1	23	1252	1274	UCAGAUAAUCCGGAUAGAAACCG	:: ::::.:::::.:.:::	ACCCUUGUAUCUGGAUUGUUUGA	Cleavage	1
Cluster_1488	UCAGAUAAUCCGGAUAGAAACCG	23	Medtr1g115950.2	| hypothetical protein | HC | chr1:52395851-52389745 | 20130731	2.5	-1	1	23	882	903	UCAGAUAAUCCGGAUAGAAACCG	::::. :::::::::::::	CCAGUUCUG-CCGGAUUAUCUGA	Cleavage	1
Cluster_1488	UCAGAUAAUCCGGAUAGAAACCG	23	Medtr1g115950.3	| hypothetical protein | HC | chr1:52395637-52389745 | 20130731	2.5	-1	1	23	681	702	UCAGAUAAUCCGGAUAGAAACCG	::::. :::::::::::::	CCAGUUCUG-CCGGAUUAUCUGA	Cleavage	1
Cluster_1494	UUUGUCUGUAUCAUCGAUUGGCCC	24	Medtr1g014710.1	| RING-finger ubiquitin ligase | HC | chr1:3505741-3509683 | 20130731	2.5	-1	1	24	648	671	UUUGUCUGUAUCAUCGAUUGGCCC	::: ::::.:.:::.::::	ACCUGAAUGGAUGGUGCAGGCAAA	Cleavage	1
Cluster_1494	UUUGUCUGUAUCAUCGAUUGGCCC	24	Medtr4g045997.1	| NAD(P)H dehydrogenase B2 | HC | chr4:16018920-16013268 | 20130731	2.5	-1	1	24	586	609	UUUGUCUGUAUCAUCGAUUGGCCC	.::::::: :.::::::::	GUCAAGAUCGAUGCUGCAGACAAA	Translation	1
Cluster_1494	UUUGUCUGUAUCAUCGAUUGGCCC	24	Medtr1g072780.1	| PWWP domain protein | HC | chr1:32307252-32311193 | 20130731	2.5	-1	1	24	781	804	UUUGUCUGUAUCAUCGAUUGGCCC	.::.:::::: ::::::::	GGAAAGAUUGAUGAUUCAGACAAA	Cleavage	1
Cluster_1494	UUUGUCUGUAUCAUCGAUUGGCCC	24	Medtr4g045997.2	| NAD(P)H dehydrogenase B2 | HC | chr4:16018731-16013283 | 20130731	2.5	-1	1	24	397	420	UUUGUCUGUAUCAUCGAUUGGCCC	.::::::: :.::::::::	GUCAAGAUCGAUGCUGCAGACAAA	Translation	1
Cluster_1494	UUUGUCUGUAUCAUCGAUUGGCCC	24	Medtr1g072780.2	| PWWP domain protein | HC | chr1:32307252-32311486 | 20130731	2.5	-1	1	24	781	804	UUUGUCUGUAUCAUCGAUUGGCCC	.::.:::::: ::::::::	GGAAAGAUUGAUGAUUCAGACAAA	Cleavage	1
Cluster_1499	UGAUUGUAGGUAAUCCCUUGUCCC	24	Medtr7g100110.1	| endoplasmic reticulum [ER]-type calcium ATPase, putative | HC | chr7:40394855-40388311 | 20130731	2.5	-1	1	24	1022	1045	UGAUUGUAGGUAAUCCCUUGUCCC	:.:::::::.:::.:..:::	UCCCCGAGGGAUUGCCUGCGGUCA	Cleavage	1
Cluster_1499	UGAUUGUAGGUAAUCCCUUGUCCC	24	Medtr1g012890.1	| mixed-lineage leukemia protein, mll protein, putative | HC | chr1:2706411-2711112 | 20130731	2.5	-1	1	24	1005	1028	UGAUUGUAGGUAAUCCCUUGUCCC	:: ::: ::::::.:::.::.:	UGGUGAAGAGAUUACUUACGAUUA	Cleavage	1
Cluster_1501	UUUUCUCCUACAUUUGCAGCCU	22	Medtr3g008446.1	| Nodule Cysteine-Rich (NCR) secreted peptide | HC | chr3:1543603-1544184 | 20130731	2.5	-1	1	22	56	77	UUUUCUCCUACAUUUGCAGCCU	:.:::::.: ::::::::::	UUGUUGCAAGUUUAGGAGAAAA	Translation	1
Cluster_1501	UUUUCUCCUACAUUUGCAGCCU	22	Medtr4g120050.1	| hypothetical protein | HC | chr4:49767136-49765740 | 20130731	2.5	-1	1	22	1106	1127	UUUUCUCCUACAUUUGCAGCCU	: ::::.::::: :::::.:::	AUGCUGUAAAUGGAGGAGGAAA	Translation	1
Cluster_1501	UUUUCUCCUACAUUUGCAGCCU	22	Medtr6g012140.1	| quinone oxidoreductase-like protein | HC | chr6:3595462-3594708 | 20130731	2.5	-1	1	22	191	212	UUUUCUCCUACAUUUGCAGCCU	::::::.::::: :::::.:::	AGGCUGUAAAUGAAGGAGGAAA	Translation	1
Cluster_1501	UUUUCUCCUACAUUUGCAGCCU	22	Medtr1g063950.1	| SAUR-like auxin-responsive family protein | HC | chr1:28118659-28119030 | 20130731	2.5	-1	1	22	158	179	UUUUCUCCUACAUUUGCAGCCU	::.::.: ::::::::::.::	UGGUUGUAUAUGUAGGAGAGAA	Cleavage	1
Cluster_1501	UUUUCUCCUACAUUUGCAGCCU	22	Medtr4g120050.2	| hypothetical protein | HC | chr4:49767507-49765244 | 20130731	2.5	-1	1	22	1477	1498	UUUUCUCCUACAUUUGCAGCCU	: ::::.::::: :::::.:::	AUGCUGUAAAUGGAGGAGGAAA	Translation	1
Cluster_1513	UUUAUUUGUUCUACUACUUCCU	22	Medtr3g032530.4	| S-adenosyl-methionine-sterol-C-methyltransferase | HC | chr3:10277352-10271553 | 20130731	2.5	-1	1	22	1014	1035	UUUAUUUGUUCUACUACUUCCU	::: ::::.:::::::::..	CUGAAUUAGUGGAACAAAUAGG	Cleavage	1
Cluster_1513	UUUAUUUGUUCUACUACUUCCU	22	Medtr8g017080.1	| TCP-1/cpn60 chaperonin family protein | HC | chr8:5738864-5745918 | 20130731	2.5	-1	1	22	807	828	UUUAUUUGUUCUACUACUUCCU	::::::::::::: .:::.::	UGGAAGUAGUAGAAGGAAUGAA	Cleavage	1
Cluster_1513	UUUAUUUGUUCUACUACUUCCU	22	Medtr1g010300.1	| embryo defective 2410 protein | HC | chr1:1902541-1916763 | 20130731	2.5	-1	1	22	1858	1879	UUUAUUUGUUCUACUACUUCCU	: ::::::::::.:::::	UGCUAAUAGUAGAACAGAUAAA	Cleavage	1
Cluster_1513	UUUAUUUGUUCUACUACUUCCU	22	Medtr3g032530.2	| S-adenosyl-methionine-sterol-C-methyltransferase | HC | chr3:10278947-10271506 | 20130731	2.5	-1	1	22	1289	1310	UUUAUUUGUUCUACUACUUCCU	::: ::::.:::::::::..	CUGAAUUAGUGGAACAAAUAGG	Cleavage	1
Cluster_1513	UUUAUUUGUUCUACUACUUCCU	22	Medtr3g032530.1	| S-adenosyl-methionine-sterol-C-methyltransferase | HC | chr3:10278947-10271579 | 20130731	2.5	-1	1	22	1201	1222	UUUAUUUGUUCUACUACUUCCU	::: ::::.:::::::::..	CUGAAUUAGUGGAACAAAUAGG	Cleavage	1
Cluster_1513	UUUAUUUGUUCUACUACUUCCU	22	Medtr8g086410.4	| MYB-like transcription factor family protein | HC | chr8:35846786-35851552 | 20130731	2.5	-1	1	22	391	412	UUUAUUUGUUCUACUACUUCCU	: ::::::::.:: :::::.::	AAGAAGUAGUGGAUCAAAUGAA	Cleavage	1
Cluster_1513	UUUAUUUGUUCUACUACUUCCU	22	Medtr8g086410.1	| MYB-like transcription factor family protein | HC | chr8:35847999-35851414 | 20130731	2.5	-1	1	22	264	285	UUUAUUUGUUCUACUACUUCCU	: ::::::::.:: :::::.::	AAGAAGUAGUGGAUCAAAUGAA	Cleavage	1
Cluster_1513	UUUAUUUGUUCUACUACUUCCU	22	Medtr8g086410.2	| MYB-like transcription factor family protein | HC | chr8:35847826-35851675 | 20130731	2.5	-1	1	22	437	458	UUUAUUUGUUCUACUACUUCCU	: ::::::::.:: :::::.::	AAGAAGUAGUGGAUCAAAUGAA	Cleavage	1
Cluster_1513	UUUAUUUGUUCUACUACUUCCU	22	Medtr8g086410.3	| MYB-like transcription factor family protein | HC | chr8:35846496-35851675 | 20130731	2.5	-1	1	22	586	607	UUUAUUUGUUCUACUACUUCCU	: ::::::::.:: :::::.::	AAGAAGUAGUGGAUCAAAUGAA	Cleavage	1
Cluster_1513	UUUAUUUGUUCUACUACUUCCU	22	Medtr3g032530.3	| S-adenosyl-methionine-sterol-C-methyltransferase | HC | chr3:10277280-10271423 | 20130731	2.5	-1	1	22	1124	1145	UUUAUUUGUUCUACUACUUCCU	::: ::::.:::::::::..	CUGAAUUAGUGGAACAAAUAGG	Cleavage	1
Cluster_1513	UUUAUUUGUUCUACUACUUCCU	22	Medtr3g032530.5	| S-adenosyl-methionine-sterol-C-methyltransferase | HC | chr3:10278947-10271564 | 20130731	2.5	-1	1	22	1289	1310	UUUAUUUGUUCUACUACUUCCU	::: ::::.:::::::::..	CUGAAUUAGUGGAACAAAUAGG	Cleavage	1
Cluster_1513	UUUAUUUGUUCUACUACUUCCU	22	Medtr7g077040.1	| kiwellin, putative | HC | chr7:29098072-29098536 | 20130731	2.5	-1	1	22	27	48	UUUAUUUGUUCUACUACUUCCU	::::.::::::.::.:..:	UCCAAGUGGUAGAAUAAGUGGA	Cleavage	1
Cluster_1513	UUUAUUUGUUCUACUACUUCCU	22	Medtr8g023050.1	| transferring glycosyl group transferase, putative | HC | chr8:8223250-8218943 | 20130731	2.5	-1	1	22	1404	1425	UUUAUUUGUUCUACUACUUCCU	: : :::: :.:::::::::::	AAGUAGUAUUGGAACAAAUAAA	Cleavage	1
Cluster_1513	UUUAUUUGUUCUACUACUUCCU	22	Medtr1g079525.1	| plastid transcriptionally active protein | HC | chr1:35351898-35342752 | 20130731	2.5	-1	1	22	2083	2104	UUUAUUUGUUCUACUACUUCCU	::::.: :::::::::.:::.:	AGGAGGAAGUAGAACAGAUAGA	Cleavage	1
Cluster_1514	UGAAUGAAUUGAUUCCUGUUGGACA	25	Medtr4g116545.1	| class II knotted-like homeobox protein | HC | chr4:48287145-48281416 | 20130731	2.5	-1	1	25	1747	1771	UGAAUGAAUUGAUUCCUGUUGGACA	:: :: :::.::::::::::	AAAAAAAAAGUAAUUAAUUCAUUCA	Cleavage	1
Cluster_1514	UGAAUGAAUUGAUUCCUGUUGGACA	25	Medtr4g021535.2	| 1-O-acylglucose:anthocyanin acyltransferase | HC | chr4:7051067-7058697 | 20130731	2.5	-1	1	25	942	966	UGAAUGAAUUGAUUCCUGUUGGACA	::::. :::::::.::::..::::	UGUCUCUCAGGAAUUAAUUUGUUCA	Cleavage	1
Cluster_1514	UGAAUGAAUUGAUUCCUGUUGGACA	25	Medtr4g116545.2	| class II knotted-like homeobox protein | HC | chr4:48287117-48281416 | 20130731	2.5	-1	1	25	1844	1868	UGAAUGAAUUGAUUCCUGUUGGACA	:: :: :::.::::::::::	AAAAAAAAAGUAAUUAAUUCAUUCA	Cleavage	1
Cluster_1514	UGAAUGAAUUGAUUCCUGUUGGACA	25	Medtr5g024895.1	| hypothetical protein | LC | chr5:10063604-10063347 | 20130731	2.5	-1	1	25	180	204	UGAAUGAAUUGAUUCCUGUUGGACA	.... ::::.:.::::::::::	GAAUUGGAAGGAGUUAAUUCAUUCA	Cleavage	1
Cluster_1514	UGAAUGAAUUGAUUCCUGUUGGACA	25	Medtr4g021535.1	| 1-O-acylglucose:anthocyanin acyltransferase | HC | chr4:7051067-7058697 | 20130731	2.5	-1	1	25	801	825	UGAAUGAAUUGAUUCCUGUUGGACA	::::. :::::::.::::..::::	UGUCUCUCAGGAAUUAAUUUGUUCA	Cleavage	1
Cluster_1516	UCAUUCAUCUCCAGAUAUG	19	Medtr5g010300.3	| transcription factor jumonji (JmjC) domain protein | HC | chr5:2711113-2733813 | 20130731	2.5	-1	1	19	2148	2166	UCAUUCAUCUCCAGAUAUG	..:.:::::::.::::::.	UGUGUCUGGAGGUGAAUGG	Cleavage	1
Cluster_1516	UCAUUCAUCUCCAGAUAUG	19	Medtr4g071190.2	| hypothetical protein | HC | chr4:26841432-26834158 | 20130731	2.5	-1	1	19	1359	1377	UCAUUCAUCUCCAGAUAUG	:::: :::::::::..::.	CAUACCUGGAGAUGGGUGG	Cleavage	1
Cluster_1516	UCAUUCAUCUCCAGAUAUG	19	Medtr4g071190.3	| hypothetical protein | HC | chr4:26841643-26834158 | 20130731	2.5	-1	1	19	1337	1355	UCAUUCAUCUCCAGAUAUG	:::: :::::::::..::.	CAUACCUGGAGAUGGGUGG	Cleavage	1
Cluster_1516	UCAUUCAUCUCCAGAUAUG	19	Medtr4g071190.1	| hypothetical protein | HC | chr4:26841432-26834158 | 20130731	2.5	-1	1	19	1236	1254	UCAUUCAUCUCCAGAUAUG	:::: :::::::::..::.	CAUACCUGGAGAUGGGUGG	Cleavage	1
Cluster_1534	GAGGAUAUGAAUUUUGUAAAAA	22	Medtr4g125940.1	| peroxidase family protein | HC | chr4:52300661-52303099 | 20130731	2.5	-1	1	22	1045	1066	GAGGAUAUGAAUUUUGUAAAAA	:::::::::..:.:::::	GACCUACAAAAUUUGUGUCCUC	Cleavage	1
Cluster_1534	GAGGAUAUGAAUUUUGUAAAAA	22	Medtr4g125940.2	| peroxidase family protein | HC | chr4:52300646-52303065 | 20130731	2.5	-1	1	22	936	957	GAGGAUAUGAAUUUUGUAAAAA	:::::::::..:.:::::	GACCUACAAAAUUUGUGUCCUC	Cleavage	1
Cluster_1534	GAGGAUAUGAAUUUUGUAAAAA	22	Medtr8g079335.1	| hypothetical protein | HC | chr8:33933410-33933746 | 20130731	2.5	-1	1	22	239	260	GAGGAUAUGAAUUUUGUAAAAA	:::::::: :::::::.:.	UACUUACAAAAAUCAUAUCUUU	Translation	1
Cluster_1535	UUUCCAGUUGUCGAACUUUCAACU	24	Medtr2g083200.1	| DDRGK domain protein | HC | chr2:34926248-34932978 | 20130731	2.5	-1	1	24	535	558	UUUCCAGUUGUCGAACUUUCAACU	: :.::::.::::: ::::::	GCGUUAGAGUUUGACAAGUGGAAA	Cleavage	1
Cluster_1548	UCACCAACCAGGACCCAAAGAGUA	24	Medtr5g019130.1	| CCAAT-binding factor | HC | chr5:7224760-7233813 | 20130731	2.5	-1	1	24	887	910	UCACCAACCAGGACCCAAAGAGUA	:.: .::: :::.::::::::::	UGCCUUUUCUGUCUUGGUUGGUGA	Cleavage	1
Cluster_1548	UCACCAACCAGGACCCAAAGAGUA	24	Medtr6g007663.1	| clasp amine-terminal protein | HC | chr6:1758602-1762992 | 20130731	2.5	-1	1	24	572	595	UCACCAACCAGGACCCAAAGAGUA	::::::::::::: ::::	AAAGGAUUGGGUCCUGGUUUGUGA	Cleavage	1
Cluster_1548	UCACCAACCAGGACCCAAAGAGUA	24	Medtr4g119670.1	| CCAAT-binding factor | HC | chr4:49603372-49594166 | 20130731	2.5	-1	1	24	715	738	UCACCAACCAGGACCCAAAGAGUA	:.::.::: :::.::::::::::	UGCUUUUUCUGUCUUGGUUGGUGA	Cleavage	1
Cluster_1549	AUUCCAUGAAGAUUGUAAAAAUG	23	Medtr2g099880.1	| DUF223 domain protein | LC | chr2:42842228-42841554 | 20130731	2.5	-1	1	23	3	25	AUUCCAUGAAGAUUGUAAAAAUG	.: :: ::.::.::::::::.:	GGUGUUCACGAUUUUCAUGGAGU	Cleavage	1
Cluster_1549	AUUCCAUGAAGAUUGUAAAAAUG	23	Medtr4g068740.2	| LRR receptor-like kinase family protein | HC | chr4:25769036-25778150 | 20130731	2.5	-1	1	23	2840	2862	AUUCCAUGAAGAUUGUAAAAAUG	: :.::::.::.:::::::	GAGAUCUGCAAUUUUUAUGGAAU	Cleavage	1
Cluster_1549	AUUCCAUGAAGAUUGUAAAAAUG	23	Medtr7g045510.1	| LRR receptor-like kinase family protein | LC | chr7:16022824-16026524 | 20130731	2.5	-1	1	23	176	198	AUUCCAUGAAGAUUGUAAAAAUG	:::.. :::::::::::.:	AAGCUUUGUUAUCUUCAUGGAGU	Cleavage	1
Cluster_1549	AUUCCAUGAAGAUUGUAAAAAUG	23	Medtr7g446190.1	| LRR receptor-like kinase family protein | LC | chr7:15680474-15675839 | 20130731	2.5	-1	1	23	122	144	AUUCCAUGAAGAUUGUAAAAAUG	:::.. :::::::::::.:	AAGCUUUGUUAUCUUCAUGGAGU	Cleavage	1
Cluster_1549	AUUCCAUGAAGAUUGUAAAAAUG	23	Medtr7g045710.1	| LRR receptor-like kinase family protein | LC | chr7:16100886-16104412 | 20130731	2.5	-1	1	23	206	228	AUUCCAUGAAGAUUGUAAAAAUG	:::.. :::::::::::.:	AAGCUUUGUUAUCUUCAUGGAGU	Cleavage	1
Cluster_1549	AUUCCAUGAAGAUUGUAAAAAUG	23	Medtr7g039330.1	| LRR receptor-like kinase family protein | LC | chr7:14603353-14607350 | 20130731	2.5	-1	1	23	176	198	AUUCCAUGAAGAUUGUAAAAAUG	:::.. :::::::::::.:	AAGCUUUGUUAUCUUCAUGGAGU	Cleavage	1
Cluster_1549	AUUCCAUGAAGAUUGUAAAAAUG	23	Medtr4g068740.1	| LRR receptor-like kinase family protein | HC | chr4:25769036-25778150 | 20130731	2.5	-1	1	23	2793	2815	AUUCCAUGAAGAUUGUAAAAAUG	: :.::::.::.:::::::	GAGAUCUGCAAUUUUUAUGGAAU	Cleavage	1
Cluster_1549	AUUCCAUGAAGAUUGUAAAAAUG	23	Medtr7g060330.1	| DUF247 domain protein | LC | chr7:21791886-21793797 | 20130731	2.5	-1	1	23	1179	1201	AUUCCAUGAAGAUUGUAAAAAUG	::::..:.:.::::::::.:	UUCUUUUGUAGUUUUCAUGGAGU	Cleavage	1
Cluster_1549	AUUCCAUGAAGAUUGUAAAAAUG	23	Medtr7g446160.1	| LRR receptor-like kinase family protein | LC | chr7:15667002-15663961 | 20130731	2.5	-1	1	23	149	171	AUUCCAUGAAGAUUGUAAAAAUG	: ::::.. :::::::::::.:	AAGUUUUGUUAUCUUCAUGGAGU	Cleavage	1
Cluster_1549	AUUCCAUGAAGAUUGUAAAAAUG	23	Medtr2g082010.1	| terpene synthase family, metal-binding domain protein | LC | chr2:34462924-34459560 | 20130731	2.5	-1	1	23	203	225	AUUCCAUGAAGAUUGUAAAAAUG	: :::::: ::::::: :::::	AACUUUUACUAUCUUCAAGGAAU	Cleavage	1
Cluster_1557	GAGGAUCUUUCUGUGAUGG	19	Medtr3g115670.1	| senescence-associated E3 ubiquitin ligase | HC | chr3:54144015-54148676 | 20130731	2.5	-1	1	19	1712	1730	GAGGAUCUUUCUGUGAUGG	:: ::::::::::::.::	GCACCACAGAAAGAUCUUC	Cleavage	1
Cluster_1557	GAGGAUCUUUCUGUGAUGG	19	Medtr3g091340.3	| CCT motif protein | HC | chr3:41548948-41546916 | 20130731	2.5	-1	1	19	391	409	GAGGAUCUUUCUGUGAUGG	:.:::::::: ::::.:::	CUAUCACAGAUAGAUUCUC	Cleavage	1
Cluster_1572	UUCAAAGGACUUUCAGAAAUGAA	23	Medtr5g030890.2	| DNA-binding protein, putative | HC | chr5:13218263-13212222 | 20130731	2.5	-1	1	23	429	451	UUCAAAGGACUUUCAGAAAUGAA	.::::.::::.::::::::.	CGUAUUUUUGAAGGUCCUUUGGU	Cleavage	1
Cluster_1572	UUCAAAGGACUUUCAGAAAUGAA	23	Medtr5g030890.1	| DNA-binding protein, putative | HC | chr5:13218384-13212221 | 20130731	2.5	-1	1	23	328	350	UUCAAAGGACUUUCAGAAAUGAA	.::::.::::.::::::::.	CGUAUUUUUGAAGGUCCUUUGGU	Cleavage	1
Cluster_1572	UUCAAAGGACUUUCAGAAAUGAA	23	Medtr5g030890.3	| DNA-binding protein, putative | HC | chr5:13218263-13212222 | 20130731	2.5	-1	1	23	301	323	UUCAAAGGACUUUCAGAAAUGAA	.::::.::::.::::::::.	CGUAUUUUUGAAGGUCCUUUGGU	Cleavage	1
Cluster_1572	UUCAAAGGACUUUCAGAAAUGAA	23	Medtr7g098480.1	| cyclin-like F-box protein | LC | chr7:39424092-39425845 | 20130731	2.5	-1	1	23	1159	1181	UUCAAAGGACUUUCAGAAAUGAA	: :::.::::.:::.:::::	AACUUUUUUGAAGGUCUUUUGAC	Cleavage	1
Cluster_1572	UUCAAAGGACUUUCAGAAAUGAA	23	Medtr5g093300.1	| 2-oxoacid dehydrogenase acyltransferase family protein | HC | chr5:40730390-40737631 | 20130731	2.5	-1	1	23	1298	1320	UUCAAAGGACUUUCAGAAAUGAA	..::: ::.:::::.:::::.	GGUGUUUAUGGAAGUCUUUUGAG	Cleavage	1
Cluster_1572	UUCAAAGGACUUUCAGAAAUGAA	23	Medtr1g068825.2	| hypothetical protein | HC | chr1:29396845-29400006 | 20130731	2.5	-1	1	23	497	519	UUCAAAGGACUUUCAGAAAUGAA	:::::::.:::::::..:::::	UUCAUUUUUGAAAGUUUUUUGAU	Cleavage	1
Cluster_1572	UUCAAAGGACUUUCAGAAAUGAA	23	Medtr7g103610.1	| type II peroxiredoxin | HC | chr7:41930315-41928967 | 20130731	2.5	-1	1	23	851	873	UUCAAAGGACUUUCAGAAAUGAA	:::: :::::.:::::::	UGAUAUUCUCAAAGUUCUUUGAA	Cleavage	1
Cluster_1572	UUCAAAGGACUUUCAGAAAUGAA	23	Medtr2g072340.1	| cytochrome P450 family 72 protein | HC | chr2:30434253-30437998 | 20130731	2.5	-1	1	23	1440	1462	UUCAAAGGACUUUCAGAAAUGAA	::::::::.:: .::::::	AGAUUUUCUGAAGGUGUUUUGAA	Cleavage	1
Cluster_1572	UUCAAAGGACUUUCAGAAAUGAA	23	Medtr1g068825.1	| hypothetical protein | HC | chr1:29396818-29400008 | 20130731	2.5	-1	1	23	524	546	UUCAAAGGACUUUCAGAAAUGAA	:::::::.:::::::..:::::	UUCAUUUUUGAAAGUUUUUUGAU	Cleavage	1
Cluster_1572	UUCAAAGGACUUUCAGAAAUGAA	23	Medtr1g107255.1	| histone acetyltransferase | HC | chr1:48542831-48547230 | 20130731	2.5	-1	1	23	1174	1196	UUCAAAGGACUUUCAGAAAUGAA	.:::: ::.:::..::::::	AAAGUUUCCGAGAGUUUUUUGAA	Cleavage	1
Cluster_1572	UUCAAAGGACUUUCAGAAAUGAA	23	Medtr3g025300.2	| U5 small nuclear ribonucleoprotein helicase | HC | chr3:7719529-7695186 | 20130731	2.5	-1	1	23	2415	2437	UUCAAAGGACUUUCAGAAAUGAA	:. ::::::::.: :.::::::	CUUUUUUCUGAAGGACUUUUGAA	Cleavage	1
Cluster_1572	UUCAAAGGACUUUCAGAAAUGAA	23	Medtr3g025300.1	| U5 small nuclear ribonucleoprotein helicase | HC | chr3:7719529-7688875 | 20130731	2.5	-1	1	23	2415	2437	UUCAAAGGACUUUCAGAAAUGAA	:. ::::::::.: :.::::::	CUUUUUUCUGAAGGACUUUUGAA	Cleavage	1
Cluster_1572	UUCAAAGGACUUUCAGAAAUGAA	23	Medtr1g107255.2	| histone acetyltransferase | HC | chr1:48542831-48547230 | 20130731	2.5	-1	1	23	1113	1135	UUCAAAGGACUUUCAGAAAUGAA	.:::: ::.:::..::::::	AAAGUUUCCGAGAGUUUUUUGAA	Cleavage	1
Cluster_1575	AACCAGAAUUUAAACGAUUG	20	Medtr7g076160.1	| COP9 signalosome complex subunit 1 | HC | chr7:28636048-28630667 | 20130731	2.5	-1	1	20	411	430	AACCAGAAUUUAAACGAUUG	...::::::...::::::::	UGGUCGUUUGGGUUCUGGUU	Cleavage	1
Cluster_1580	UUAUGAAGAACUGAAGGCCU	20	Medtr8g040180.1	| peptidyl-prolyl cis-trans isomerase | HC | chr8:14958560-14952954 | 20130731	2.5	-1	1	20	506	525	UUAUGAAGAACUGAAGGCCU	::.. :::::::::.::::	UGGUUGUCAGUUCUUUAUAA	Cleavage	1
Cluster_1581	UGAAAAACACUGAAUGAUUCGUUGU	25	Medtr5g045910.1	| LRR receptor-like kinase family protein | HC | chr5:20129800-20139083 | 20130731	2.5	-1	1	25	1165	1189	UGAAAAACACUGAAUGAUUCGUUGU	: :::: ::..:::::::::.	UUGUCAAAUCUUUUGGUGUUUUUCG	Cleavage	1
Cluster_1581	UGAAAAACACUGAAUGAUUCGUUGU	25	Medtr8g079780.1	| phosphoglycerate mutase | HC | chr8:34192984-34198256 | 20130731	2.5	-1	1	25	835	859	UGAAAAACACUGAAUGAUUCGUUGU	:::: :::: :.:::::::::::	UCAACACAUCAGUUAGUGUUUUUCA	Cleavage	1
Cluster_1583	UUAUGAAGAACUGAAGGCCU	20	Medtr8g040180.1	| peptidyl-prolyl cis-trans isomerase | HC | chr8:14958560-14952954 | 20130731	2.5	-1	1	20	506	525	UUAUGAAGAACUGAAGGCCU	::.. :::::::::.::::	UGGUUGUCAGUUCUUUAUAA	Cleavage	1
Cluster_1585	AGGACACCAGACGUUGAGAGAG	22	Medtr4g134390.1	| F-box protein interaction domain protein | HC | chr4:56277229-56278440 | 20130731	2.5	-1	1	22	867	888	AGGACACCAGACGUUGAGAGAG	:::. :.::::::::::.:	AGGUCUUCAUGUCUGGUGUCUU	Cleavage	1
Cluster_1585	AGGACACCAGACGUUGAGAGAG	22	Medtr2g039770.1	| disease resistance protein (TIR-NBS-LRR class) | LC | chr2:17437701-17443829 | 20130731	2.5	-1	1	22	2305	2326	AGGACACCAGACGUUGAGAGAG	:::::::::::::::.:	UCCGAUCAACGUCUGGUGUCUU	Cleavage	1
Cluster_1586	GUCAAGGUCUAAACAAGAACU	21	Medtr7g011160.1	| hypothetical protein | LC | chr7:2945020-2947812 | 20130731	2.5	-1	1	21	643	663	GUCAAGGUCUAAACAAGAACU	: :::::::.:..::::::	UUUGCUUGUUUGGGUCUUGAC	Cleavage	1
Cluster_1590	UCGCAUCAGCAAAUGGAUGAUG	22	Medtr3g034370.1	| BPS1 | HC | chr3:11125789-11126712 | 20130731	2.5	-1	1	22	760	781	UCGCAUCAGCAAAUGGAUGAUG	::::::.::::: :::::.::	AAUCAUCUAUUUGAUGAUGUGA	Cleavage	1
Cluster_1606	UUUUAAUUACAUGAACUCUCUGA	23	Medtr4g130510.3	| cellulose synthase-like protein | HC | chr4:54385770-54379898 | 20130731	2.5	-1	1	23	4034	4056	UUUUAAUUACAUGAACUCUCUGA	: : : : :::::::::::::.:	UAACAUAUUUCAUGUAAUUAAGA	Cleavage	1
Cluster_1606	UUUUAAUUACAUGAACUCUCUGA	23	Medtr6g071320.1	| PPR containing plant-like protein | HC | chr6:26368240-26366732 | 20130731	2.5	-1	1	23	361	383	UUUUAAUUACAUGAACUCUCUGA	::::::::::::..::...:	GUUGAGAGUUCAUGUGGUUGGGA	Cleavage	1
Cluster_1606	UUUUAAUUACAUGAACUCUCUGA	23	Medtr4g130510.1	| cellulose synthase-like protein | HC | chr4:54385770-54379898 | 20130731	2.5	-1	1	23	3764	3786	UUUUAAUUACAUGAACUCUCUGA	: : : : :::::::::::::.:	UAACAUAUUUCAUGUAAUUAAGA	Cleavage	1
Cluster_1606	UUUUAAUUACAUGAACUCUCUGA	23	Medtr4g130510.4	| cellulose synthase-like protein | HC | chr4:54385837-54379898 | 20130731	2.5	-1	1	23	3933	3955	UUUUAAUUACAUGAACUCUCUGA	: : : : :::::::::::::.:	UAACAUAUUUCAUGUAAUUAAGA	Cleavage	1
Cluster_1606	UUUUAAUUACAUGAACUCUCUGA	23	Medtr4g130510.2	| cellulose synthase-like protein | HC | chr4:54385770-54379898 | 20130731	2.5	-1	1	23	3866	3888	UUUUAAUUACAUGAACUCUCUGA	: : : : :::::::::::::.:	UAACAUAUUUCAUGUAAUUAAGA	Cleavage	1
Cluster_161	UUCCUGUUAACUCAUGAACU	20	Medtr2g006910.2	| cysteine-rich RLK (receptor-like kinase) protein | HC | chr2:716804-719828 | 20130731	2.5	-1	1	20	1012	1031	UUCCUGUUAACUCAUGAACU	:::. ::.::::::::::.	UGUUUUUGGGUUAACAGGAG	Cleavage	1
Cluster_161	UUCCUGUUAACUCAUGAACU	20	Medtr2g006910.1	| cysteine-rich RLK (receptor-like kinase) protein | HC | chr2:716804-719828 | 20130731	2.5	-1	1	20	1012	1031	UUCCUGUUAACUCAUGAACU	:::. ::.::::::::::.	UGUUUUUGGGUUAACAGGAG	Cleavage	1
Cluster_161	UUCCUGUUAACUCAUGAACU	20	Medtr3g090170.1	| vacuolar protein sorting-associated protein | HC | chr3:40981370-40988641 | 20130731	2.5	-1	1	20	897	916	UUCCUGUUAACUCAUGAACU	.:::::::: ::.:.:::::	GGUUCAUGAAUUGAUAGGAA	Translation	1
Cluster_161	UUCCUGUUAACUCAUGAACU	20	Medtr3g090170.2	| vacuolar protein sorting-associated protein | HC | chr3:40981372-40986256 | 20130731	2.5	-1	1	20	895	914	UUCCUGUUAACUCAUGAACU	.:::::::: ::.:.:::::	GGUUCAUGAAUUGAUAGGAA	Translation	1
Cluster_1619	UUCCAAGGAUCAAUCUUCUGAACA	24	Medtr8g069850.1	| LAG1 longevity assurance-like protein | HC | chr8:29518210-29525173 | 20130731	2.5	-1	1	24	298	321	UUCCAAGGAUCAAUCUUCUGAACA	::::::::::: .::::.:	UGGCAAGAAGAUUGAUAUUUGGGA	Cleavage	1
Cluster_1619	UUCCAAGGAUCAAUCUUCUGAACA	24	Medtr6g015865.1	| COBRA-like protein 2 precursor | HC | chr6:5541281-5538764 | 20130731	2.5	-1	1	24	1179	1202	UUCCAAGGAUCAAUCUUCUGAACA	:::.: .: ::::::::::::::	AGUUUAAGACAUUGAUCCUUGGAA	Cleavage	1
Cluster_1619	UUCCAAGGAUCAAUCUUCUGAACA	24	Medtr8g103510.1	| transmembrane protein, putative | HC | chr8:43549336-43548263 | 20130731	2.5	-1	1	24	992	1015	UUCCAAGGAUCAAUCUUCUGAACA	:: ::::::::::::: :::	CGAACAAAAGAUUGAUCCUUUGAA	Cleavage	1
Cluster_1619	UUCCAAGGAUCAAUCUUCUGAACA	24	Medtr1g050340.2	| transcriptional corepressor leunig-like protein | HC | chr1:19813511-19799845 | 20130731	2.5	-1	1	24	1590	1613	UUCCAAGGAUCAAUCUUCUGAACA	:::::.::: ::.::::::	UGACAAGAAGGUUGUUCUUUGGAA	Translation	1
Cluster_1619	UUCCAAGGAUCAAUCUUCUGAACA	24	Medtr6g074880.1	| 3-ketoacyl-CoA synthase-like protein | LC | chr6:27778616-27776356 | 20130731	2.5	-1	1	24	1350	1373	UUCCAAGGAUCAAUCUUCUGAACA	:::: ::.::::: :::::::::.	UGUUAAGGAGAUUAAUCCUUGGAG	Translation	1
Cluster_1619	UUCCAAGGAUCAAUCUUCUGAACA	24	Medtr3g101773.1	| hypothetical protein | LC | chr3:46858880-46856758 | 20130731	2.5	-1	1	24	303	326	UUCCAAGGAUCAAUCUUCUGAACA	:.::::: ::::::::::.:	GAAACGGAAGAAUGAUCCUUGGGA	Cleavage	1
Cluster_1619	UUCCAAGGAUCAAUCUUCUGAACA	24	Medtr7g063840.1	| DUF674 family protein | LC | chr7:23327691-23326043 | 20130731	2.5	-1	1	24	874	897	UUCCAAGGAUCAAUCUUCUGAACA	::.:::::: :::::::.:	CUAAGAGGAGAUUGUUCCUUGGGA	Translation	1
Cluster_1619	UUCCAAGGAUCAAUCUUCUGAACA	24	Medtr1g050340.1	| transcriptional corepressor leunig-like protein | HC | chr1:19813841-19799845 | 20130731	2.5	-1	1	24	1829	1852	UUCCAAGGAUCAAUCUUCUGAACA	:::::.::: ::.::::::	UGACAAGAAGGUUGUUCUUUGGAA	Translation	1
Cluster_1627	UUACCACCAUUAGAUUCGUCUUG	23	Medtr7g078310.1	| papain family cysteine protease | LC | chr7:29607978-29606369 | 20130731	2.5	-1	1	23	643	665	UUACCACCAUUAGAUUCGUCUUG	:.:.:: ::::::::::::	ACCAAUGGAUGUAAUGGUGGUAA	Cleavage	1
Cluster_1627	UUACCACCAUUAGAUUCGUCUUG	23	Medtr7g078630.1	| cysteine proteinase superfamily protein | LC | chr7:29742896-29746999 | 20130731	2.5	-1	1	23	2512	2534	UUACCACCAUUAGAUUCGUCUUG	:.:.:: ::::::::::::	ACCAAUGGAUGUAAUGGUGGUAA	Cleavage	1
Cluster_1627	UUACCACCAUUAGAUUCGUCUUG	23	Medtr5g082260.1	| M50 family peptidase | HC | chr5:35349840-35358220 | 20130731	2.5	-1	1	23	297	319	UUACCACCAUUAGAUUCGUCUUG	:.::::::.:::::: :::	GUUAAUGAAUCUGAUGGUGAUAA	Cleavage	1
Cluster_1627	UUACCACCAUUAGAUUCGUCUUG	23	Medtr7g095000.1	| splicing factor Prp18 family protein | HC | chr7:37973877-37978307 | 20130731	2.5	-1	1	23	752	774	UUACCACCAUUAGAUUCGUCUUG	:..:.:::::.:::::::.:	UGUGGUGGAUCUAGUGGUGGUGA	Cleavage	1
Cluster_1627	UUACCACCAUUAGAUUCGUCUUG	23	Medtr5g081460.1	| hypothetical protein | HC | chr5:34885991-34888604 | 20130731	2.5	-1	1	23	1237	1259	UUACCACCAUUAGAUUCGUCUUG	:.:: :.:::::::::::.	AUUAAUGACUUUAAUGGUGGUAG	Cleavage	1
Cluster_163	AUGGCACAAGAAACUUUCGAAU	22	Medtr7g088650.1	| NB-ARC domain disease resistance protein | LC | chr7:34566694-34562187 | 20130731	2.5	-1	1	22	510	531	AUGGCACAAGAAACUUUCGAAU	:.:::::::: :::::.:::	CAUUGAAAGUUUAUUGUGUCAU	Translation	1
Cluster_163	AUGGCACAAGAAACUUUCGAAU	22	Medtr7g033080.1	| hypothetical protein | HC | chr7:11681784-11680900 | 20130731	2.5	-1	1	22	394	415	AUGGCACAAGAAACUUUCGAAU	.::.::::::::::::.:	CCAUGAGAGUUUCUUGUGCUAA	Cleavage	1
Cluster_164	UUUUGAGAUUGUGAGGAAG	19	Medtr1g041695.1	| phosphate transporter PHO1-like protein | HC | chr1:15646020-15637367 | 20130731	2.5	-1	1	19	66	84	UUUUGAGAUUGUGAGGAAG	:::: ::::::::::: ::	CUUCAUCACAAUCUCACAA	Cleavage	1
Cluster_164	UUUUGAGAUUGUGAGGAAG	19	Medtr5g087070.1	| receptor-like protein | LC | chr5:37698503-37695240 | 20130731	2.5	-1	1	19	2886	2904	UUUUGAGAUUGUGAGGAAG	::::::: ::.:::.::::	CUUCCUCUCAGUCUUAAAA	Cleavage	1
Cluster_164	UUUUGAGAUUGUGAGGAAG	19	Medtr2g008030.1	| fructose-1,6-bisphosphatase, cytosolic-like protein | HC | chr2:1254618-1250643 | 20130731	2.5	-1	1	19	188	206	UUUUGAGAUUGUGAGGAAG	.:: .:::.::::::::::	UUUGUUCAUAAUCUCAAAA	Cleavage	1
Cluster_164	UUUUGAGAUUGUGAGGAAG	19	Medtr3g064930.1	| importin-like protein | LC | chr3:29296370-29289091 | 20130731	2.5	-1	1	19	409	427	UUUUGAGAUUGUGAGGAAG	::::.::::: :.::::::	CUUCUUCACAUUUUCAAAA	Cleavage	1
Cluster_164	UUUUGAGAUUGUGAGGAAG	19	Medtr8g019500.1	| iron-regulated ABC transporter membrane component SufB | HC | chr8:6868946-6865170 | 20130731	2.5	-1	1	19	501	519	UUUUGAGAUUGUGAGGAAG	::::::: ::::::::::	CUUCCUCCCAAUCUCAAAU	Cleavage	1
Cluster_164	UUUUGAGAUUGUGAGGAAG	19	Medtr8g058250.3	| LRR receptor-like kinase | HC | chr8:20050499-20063881 | 20130731	2.5	-1	1	19	613	631	UUUUGAGAUUGUGAGGAAG	:::::::..:.::::..::	CUUCCUCGUAGUCUCGGAA	Cleavage	1
Cluster_164	UUUUGAGAUUGUGAGGAAG	19	Medtr8g009900.2	| glutamyl-tRNA synthetase | HC | chr8:2456536-2462483 | 20130731	2.5	-1	1	19	1238	1256	UUUUGAGAUUGUGAGGAAG	::::::::::.: :::.::	CUUCCUCACAGUAUCAGAA	Cleavage	1
Cluster_164	UUUUGAGAUUGUGAGGAAG	19	Medtr7g072560.2	| saposin B domain protein | HC | chr7:26989815-26995338 | 20130731	2.5	-1	1	19	216	234	UUUUGAGAUUGUGAGGAAG	:::.:.:.::::::::::	AUUCUUUAUAAUCUCAAAA	Cleavage	1
Cluster_164	UUUUGAGAUUGUGAGGAAG	19	Medtr7g113500.1	| F-box protein interaction domain protein | LC | chr7:46768376-46769669 | 20130731	2.5	-1	1	19	829	847	UUUUGAGAUUGUGAGGAAG	.::.::::..::.::::::	UUUUCUCAUGAUUUCAAAA	Cleavage	1
Cluster_164	UUUUGAGAUUGUGAGGAAG	19	Medtr2g450690.1	| Nodule Cysteine-Rich (NCR) secreted peptide | HC | chr2:22519795-22520288 | 20130731	2.5	-1	1	19	285	303	UUUUGAGAUUGUGAGGAAG	.::..:.:.::::::::::	UUUUUUUAUAAUCUCAAAA	Cleavage	1
Cluster_164	UUUUGAGAUUGUGAGGAAG	19	Medtr1g063040.1	| HASTY 1 | LC | chr1:27704528-27710520 | 20130731	2.5	-1	1	19	1152	1170	UUUUGAGAUUGUGAGGAAG	.:::.::::: ::::::::	UUUCUUCACAUUCUCAAAA	Cleavage	1
Cluster_164	UUUUGAGAUUGUGAGGAAG	19	Medtr8g058250.1	| LRR receptor-like kinase | HC | chr8:20050499-20063881 | 20130731	2.5	-1	1	19	791	809	UUUUGAGAUUGUGAGGAAG	:::::::..:.::::..::	CUUCCUCGUAGUCUCGGAA	Cleavage	1
Cluster_164	UUUUGAGAUUGUGAGGAAG	19	Medtr1g040565.1	| pentatricopeptide (PPR) repeat protein | HC | chr1:15020896-15019352 | 20130731	2.5	-1	1	19	1373	1391	UUUUGAGAUUGUGAGGAAG	:: ::::::::::::.::	CUCACUCACAAUCUCAGAA	Cleavage	1
Cluster_164	UUUUGAGAUUGUGAGGAAG	19	Medtr8g009900.1	| glutamyl-tRNA synthetase | HC | chr8:2456519-2462483 | 20130731	2.5	-1	1	19	1255	1273	UUUUGAGAUUGUGAGGAAG	::::::::::.: :::.::	CUUCCUCACAGUAUCAGAA	Cleavage	1
Cluster_164	UUUUGAGAUUGUGAGGAAG	19	Medtr1g040585.1	| pentatricopeptide (PPR) repeat protein | HC | chr1:15028593-15026470 | 20130731	2.5	-1	1	19	1544	1562	UUUUGAGAUUGUGAGGAAG	:: ::::::::::::.::	CUCACUCACAAUCUCAGAA	Cleavage	1
Cluster_164	UUUUGAGAUUGUGAGGAAG	19	Medtr3g005560.2	| cellulose synthase-like protein D3 | HC | chr3:269957-274203 | 20130731	2.5	-1	1	19	773	791	UUUUGAGAUUGUGAGGAAG	::::::::::: .:::::.	CUUCCUCACAAAUUCAAAG	Cleavage	1
Cluster_164	UUUUGAGAUUGUGAGGAAG	19	Medtr3g005560.3	| cellulose synthase-like protein D3 | HC | chr3:269957-274986 | 20130731	2.5	-1	1	19	773	791	UUUUGAGAUUGUGAGGAAG	::::::::::: .:::::.	CUUCCUCACAAAUUCAAAG	Cleavage	1
Cluster_164	UUUUGAGAUUGUGAGGAAG	19	Medtr8g058250.2	| LRR receptor-like kinase | HC | chr8:20050499-20063064 | 20130731	2.5	-1	1	19	791	809	UUUUGAGAUUGUGAGGAAG	:::::::..:.::::..::	CUUCCUCGUAGUCUCGGAA	Cleavage	1
Cluster_164	UUUUGAGAUUGUGAGGAAG	19	Medtr3g005560.1	| cellulose synthase-like protein D3 | HC | chr3:269889-275204 | 20130731	2.5	-1	1	19	841	859	UUUUGAGAUUGUGAGGAAG	::::::::::: .:::::.	CUUCCUCACAAAUUCAAAG	Cleavage	1
Cluster_164	UUUUGAGAUUGUGAGGAAG	19	Medtr3g025330.1	| RING/FYVE/PHD zinc finger protein, putative | HC | chr3:7740950-7733410 | 20130731	2.5	-1	1	19	1515	1533	UUUUGAGAUUGUGAGGAAG	::: ::::::::::::.:	CUUAAUCACAAUCUCAAGA	Cleavage	1
Cluster_1666	CGACAGCUUCCUUGGAUUCC	20	Medtr1g055300.1	| Fe-S protein assembly co-chaperone HscB | HC | chr1:24447641-24444078 | 20130731	2.5	-1	1	20	609	628	CGACAGCUUCCUUGGAUUCC	:::: .::.:::::::::.:	GGAAAUCAGGGAAGCUGUUG	Cleavage	1
Cluster_1666	CGACAGCUUCCUUGGAUUCC	20	Medtr8g046210.1	| cytochrome P450 family protein | HC | chr8:18091825-18094727 | 20130731	2.5	-1	1	20	599	618	CGACAGCUUCCUUGGAUUCC	::: ...::::::::::::	CGAAAUUGAGGAAGCUGUCG	Cleavage	1
Cluster_1666	CGACAGCUUCCUUGGAUUCC	20	Medtr1g055300.2	| Fe-S protein assembly co-chaperone HscB | HC | chr1:24447831-24444068 | 20130731	2.5	-1	1	20	799	818	CGACAGCUUCCUUGGAUUCC	:::: .::.:::::::::.:	GGAAAUCAGGGAAGCUGUUG	Cleavage	1
Cluster_1666	CGACAGCUUCCUUGGAUUCC	20	Medtr8g107510.1	| potassium transporter-like protein | HC | chr8:45457929-45461875 | 20130731	2.5	-1	1	20	153	172	CGACAGCUUCCUUGGAUUCC	::::::.::::::.:::.	UGAAUCCGAGGAAGUUGUUU	Cleavage	1
Cluster_1666	CGACAGCUUCCUUGGAUUCC	20	Medtr5g037410.1	| tyrosine kinase family protein | HC | chr5:16386506-16383754 | 20130731	2.5	-1	1	20	2103	2122	CGACAGCUUCCUUGGAUUCC	:: :: :::::::.:::::	UGAUUCAAAGGAAGUUGUCG	Cleavage	1
Cluster_1667	UGAAGGAUCAGUAAGUAAUGUGG	23	Medtr3g096230.2	| MAP kinase kinase kinase | HC | chr3:43980361-43985582 | 20130731	2.5	-1	1	23	2290	2312	UGAAGGAUCAGUAAGUAAUGUGG	.::::: :::::::: :::::	AGGCAUUAAUUACUGAUACUUCA	Cleavage	1
Cluster_1667	UGAAGGAUCAGUAAGUAAUGUGG	23	Medtr5g058810.1	| ribonuclease II family protein | HC | chr5:24281512-24288073 | 20130731	2.5	-1	1	23	1730	1752	UGAAGGAUCAGUAAGUAAUGUGG	:: ::::.::::::::::	CAUUUUUUCUUAUUGAUCCUUCA	Cleavage	1
Cluster_1669	UGUUCGUUUCCCACAGUUGGCCU	23	Medtr4g094882.1	| chromosome-associated kinesin KIF4A-like protein | HC | chr4:39197764-39208517 | 20130731	2.5	-1	1	23	3070	3092	UGUUCGUUUCCCACAGUUGGCCU	:::::.::::::::: :::.:	GUGCCAAUUGUGGGAAAAGAAUA	Cleavage	1
Cluster_167	UGUCGAUCAAUUUUGGGAU	19	Medtr4g027125.1	| hypothetical protein | LC | chr4:9330895-9329567 | 20130731	2.5	-1	1	19	1300	1318	UGUCGAUCAAUUUUGGGAU	:: ::::: ::::::::::	AUACCAAAUUUGAUCGACA	Translation	1
Cluster_167	UGUCGAUCAAUUUUGGGAU	19	Medtr4g027255.1	| nucleotide-binding site LRR protein, putative | HC | chr4:9386395-9383350 | 20130731	2.5	-1	1	19	2185	2203	UGUCGAUCAAUUUUGGGAU	:: ::::: ::::::::::	AUACCAAAUUUGAUCGACA	Translation	1
Cluster_167	UGUCGAUCAAUUUUGGGAU	19	Medtr2g039140.1	| hypothetical protein | LC | chr2:17137356-17135141 | 20130731	2.5	-1	1	19	386	404	UGUCGAUCAAUUUUGGGAU	:.:::::::::::.:.::	UUUCCAAAAUUGAUUGGCA	Cleavage	1
Cluster_167	UGUCGAUCAAUUUUGGGAU	19	Medtr8g101570.1	| homotetrameric cytidine deaminase | HC | chr8:42691327-42690009 | 20130731	2.5	-1	1	19	148	166	UGUCGAUCAAUUUUGGGAU	:::::::::: :::::::	AUCCCAAAAUGGAUCGACC	Cleavage	1
Cluster_167	UGUCGAUCAAUUUUGGGAU	19	Medtr3g062420.1	| LRR and NB-ARC domain disease resistance protein, putative | LC | chr3:28175773-28188696 | 20130731	2.5	-1	1	19	2854	2872	UGUCGAUCAAUUUUGGGAU	::.::.:: ::::::::::	AUUCCGAAUUUGAUCGACA	Translation	1
Cluster_1679	UCAGCAUUGUCUCAGACUAUUGUU	24	Medtr8g465130.1	| transmembrane protein, putative | LC | chr8:23167789-23169635 | 20130731	2.5	-1	1	24	323	347	UCAGCAUUGUCUCAGACUAU-UGUU	::.: ::.::: :::::::::.::.	AAUAUAUGGUCCGAGACAAUGUUGG	Cleavage	1
Cluster_1679	UCAGCAUUGUCUCAGACUAUUGUU	24	Medtr4g102570.1	| hypothetical protein | LC | chr4:42525199-42525829 | 20130731	2.5	-1	1	24	201	224	UCAGCAUUGUCUCAGACUAUUGUU	::::.: ::.:::::::::	UGAUUUAGUUUUAGGCAAUGCUGA	Cleavage	1
Cluster_1682	UGGGCCAGCGAAAUCUAAAUGAGGA	25	Medtr2g099050.1	| bZIP transcription factor | HC | chr2:42433131-42428985 | 20130731	2.5	-1	1	25	1561	1585	UGGGCCAGCGAAAUCUAAAUGAGGA	:::::::::::.:: :.::	UAUAACUUUAGAUUUCGUUGUCUCA	Cleavage	1
Cluster_1682	UGGGCCAGCGAAAUCUAAAUGAGGA	25	Medtr8g091650.3	| BZIP family transcription factor | HC | chr8:38237273-38240394 | 20130731	2.5	-1	1	25	498	522	UGGGCCAGCGAAAUCUAAAUGAGGA	: ::::::.:::.::::::.:	UAAUAAUUUAGGUUUUGCUGGCUCU	Cleavage	1
Cluster_1682	UGGGCCAGCGAAAUCUAAAUGAGGA	25	Medtr8g091650.4	| BZIP family transcription factor | HC | chr8:38238154-38240394 | 20130731	2.5	-1	1	25	171	195	UGGGCCAGCGAAAUCUAAAUGAGGA	: ::::::.:::.::::::.:	UAAUAAUUUAGGUUUUGCUGGCUCU	Cleavage	1
Cluster_1682	UGGGCCAGCGAAAUCUAAAUGAGGA	25	Medtr8g091650.2	| BZIP family transcription factor | HC | chr8:38237273-38240394 | 20130731	2.5	-1	1	25	390	414	UGGGCCAGCGAAAUCUAAAUGAGGA	: ::::::.:::.::::::.:	UAAUAAUUUAGGUUUUGCUGGCUCU	Cleavage	1
Cluster_1682	UGGGCCAGCGAAAUCUAAAUGAGGA	25	Medtr8g091650.1	| BZIP family transcription factor | HC | chr8:38237273-38240394 | 20130731	2.5	-1	1	25	390	414	UGGGCCAGCGAAAUCUAAAUGAGGA	: ::::::.:::.::::::.:	UAAUAAUUUAGGUUUUGCUGGCUCU	Cleavage	1
Cluster_1682	UGGGCCAGCGAAAUCUAAAUGAGGA	25	Medtr8g091650.5	| BZIP family transcription factor | HC | chr8:38238154-38240394 | 20130731	2.5	-1	1	25	171	195	UGGGCCAGCGAAAUCUAAAUGAGGA	: ::::::.:::.::::::.:	UAAUAAUUUAGGUUUUGCUGGCUCU	Cleavage	1
Cluster_1684	UCACCUGGUUUAUGACCUG	19	Medtr4g073930.1	| PPR containing plant-like protein | HC | chr4:28099513-28096632 | 20130731	2.5	-1	1	19	1670	1688	UCACCUGGUUUAUGACCUG	.:: :..::::::::::::	UAGAUUGUAAACCAGGUGA	Cleavage	1
Cluster_1684	UCACCUGGUUUAUGACCUG	19	Medtr7g094670.1	| mRNA capping enzyme, putative | LC | chr7:37775862-37750453 | 20130731	2.5	-1	1	19	1994	2012	UCACCUGGUUUAUGACCUG	..: ::::::::.::::::	UGGCUCAUAAACUAGGUGA	Cleavage	1
Cluster_1685	UUUUUAGAACUUUCCACCGGGA	22	Medtr5g096500.2	| zinc finger C-x8-C-x5-C-x3-H type protein | HC | chr5:42194148-42202938 | 20130731	2.5	-1	1	22	2217	2238	UUUUUAGAACUUUCCACCGGGA	: ::::::: :::::::::	AUACUGUGGAAAUUUCUAAAAA	Translation	1
Cluster_1685	UUUUUAGAACUUUCCACCGGGA	22	Medtr4g025470.1	| NB-ARC domain disease resistance protein | LC | chr4:8642485-8635609 | 20130731	2.5	-1	1	22	2885	2906	UUUUUAGAACUUUCCACCGGGA	: .::: :.:::::.::::::	CCAUGGUUGGAAGUUUUAAAAA	Cleavage	1
Cluster_1685	UUUUUAGAACUUUCCACCGGGA	22	Medtr7g105050.1	| beta-fructofuranosidase, insoluble protein | HC | chr7:42588772-42592563 | 20130731	2.5	-1	1	22	1556	1577	UUUUUAGAACUUUCCACCGGGA	.:::::::::::.:..:.:	CAGUGGUGGAAAGUUUUGGAGA	Cleavage	1
Cluster_1685	UUUUUAGAACUUUCCACCGGGA	22	Medtr3g053340.1	| hypothetical protein | HC | chr3:21197400-21204183 | 20130731	2.5	-1	1	22	2056	2077	UUUUUAGAACUUUCCACCGGGA	: ::::::: :::::::::	AUACUGUGGAAAUUUCUAAAAA	Translation	1
Cluster_1685	UUUUUAGAACUUUCCACCGGGA	22	Medtr4g025430.1	| NB-ARC domain disease resistance protein | LC | chr4:8616565-8622662 | 20130731	2.5	-1	1	22	2765	2786	UUUUUAGAACUUUCCACCGGGA	: .::: :.:::::.::::::	CCAUGGUUGGAAGUUUUAAAAA	Cleavage	1
Cluster_1685	UUUUUAGAACUUUCCACCGGGA	22	Medtr8g064200.1	| flavonol synthase/flavanone 3-hydroxylase | HC | chr8:26915661-26913601 | 20130731	2.5	-1	1	22	275	296	UUUUUAGAACUUUCCACCGGGA	: ..:::::::: ::.::::::	UAUUGGUGGAAAAUUUUAAAAA	Translation	1
Cluster_1685	UUUUUAGAACUUUCCACCGGGA	22	Medtr3g053340.2	| hypothetical protein | HC | chr3:21197400-21204183 | 20130731	2.5	-1	1	22	2056	2077	UUUUUAGAACUUUCCACCGGGA	: ::::::: :::::::::	AUACUGUGGAAAUUUCUAAAAA	Translation	1
Cluster_1685	UUUUUAGAACUUUCCACCGGGA	22	Medtr5g096500.1	| zinc finger C-x8-C-x5-C-x3-H type protein | HC | chr5:42194135-42202553 | 20130731	2.5	-1	1	22	2233	2254	UUUUUAGAACUUUCCACCGGGA	: ::::::: :::::::::	AUACUGUGGAAAUUUCUAAAAA	Translation	1
Cluster_1685	UUUUUAGAACUUUCCACCGGGA	22	Medtr6g084990.1	| transmembrane protein, putative | LC | chr6:32006479-32009056 | 20130731	2.5	-1	1	22	266	287	UUUUUAGAACUUUCCACCGGGA	.::::::::::::: .::.:	AAUCGGUGGAAAGUUCGGAAGA	Cleavage	1
Cluster_1685	UUUUUAGAACUUUCCACCGGGA	22	Medtr3g053340.3	| hypothetical protein | HC | chr3:21197380-21204183 | 20130731	2.5	-1	1	22	2076	2097	UUUUUAGAACUUUCCACCGGGA	: ::::::: :::::::::	AUACUGUGGAAAUUUCUAAAAA	Translation	1
Cluster_1685	UUUUUAGAACUUUCCACCGGGA	22	Medtr5g096500.3	| zinc finger C-x8-C-x5-C-x3-H type protein | HC | chr5:42194148-42202938 | 20130731	2.5	-1	1	22	2220	2241	UUUUUAGAACUUUCCACCGGGA	: ::::::: :::::::::	AUACUGUGGAAAUUUCUAAAAA	Translation	1
Cluster_1685	UUUUUAGAACUUUCCACCGGGA	22	Medtr5g048470.1	| flavonol synthase/flavanone 3-hydroxylase | HC | chr5:21208958-21213009 | 20130731	2.5	-1	1	22	476	497	UUUUUAGAACUUUCCACCGGGA	: ..:::::::: ::.::::::	UAUUGGUGGAAAAUUUUAAAAA	Translation	1
Cluster_1685	UUUUUAGAACUUUCCACCGGGA	22	Medtr8g064200.2	| flavonol synthase/flavanone 3-hydroxylase | HC | chr8:26918519-26913601 | 20130731	2.5	-1	1	22	290	311	UUUUUAGAACUUUCCACCGGGA	: ..:::::::: ::.::::::	UAUUGGUGGAAAAUUUUAAAAA	Translation	1
Cluster_1685	UUUUUAGAACUUUCCACCGGGA	22	Medtr8g064200.3	| flavonol synthase/flavanone 3-hydroxylase | HC | chr8:26915661-26913601 | 20130731	2.5	-1	1	22	275	296	UUUUUAGAACUUUCCACCGGGA	: ..:::::::: ::.::::::	UAUUGGUGGAAAAUUUUAAAAA	Translation	1
Cluster_1685	UUUUUAGAACUUUCCACCGGGA	22	Medtr8g064200.4	| flavonol synthase/flavanone 3-hydroxylase | HC | chr8:26918519-26913601 | 20130731	2.5	-1	1	22	290	311	UUUUUAGAACUUUCCACCGGGA	: ..:::::::: ::.::::::	UAUUGGUGGAAAAUUUUAAAAA	Translation	1
Cluster_1688	AAUCGGAGAUAAAGUACUAUAUU	23	Medtr1g061100.1	| Nodule Cysteine-Rich (NCR) secreted peptide | HC | chr1:26649372-26650217 | 20130731	2.5	-1	1	23	163	185	AAUCGGAGAUAAAGUACUAUAUU	::::::::::.:..::::	AAGUCAGUACUUUAUUUUUGAUU	Cleavage	1
Cluster_1688	AAUCGGAGAUAAAGUACUAUAUU	23	Medtr3g109685.1	| transmembrane protein, putative | HC | chr3:51306337-51308933 | 20130731	2.5	-1	1	23	1418	1440	AAUCGGAGAUAAAGUACUAUAUU	: :.::.:::::::::.:::	GUUUUGGUGCUUUAUCUCUGAUG	Cleavage	1
Cluster_1689	UAAUCUCUGAAAUGUUCCUGGUG	23	Medtr4g017180.1	| transmembrane protein, putative | LC | chr4:5322902-5324532 | 20130731	2.5	-1	1	23	241	263	UAAUCUCUGAAAUGUUCCUGGUG	:::::.:: ::::::.:::	GUGAAGGAAUAUGUCAGAGGUUA	Translation	1
Cluster_1689	UAAUCUCUGAAAUGUUCCUGGUG	23	Medtr8g092640.1	| hypothetical protein | LC | chr8:38755148-38754831 | 20130731	2.5	-1	1	23	105	127	UAAUCUCUGAAAUGUUCCUGGUG	::::::::::..:.:.::.	UAAAAGGAACAUUUUGGGGGUUG	Cleavage	1
Cluster_1689	UAAUCUCUGAAAUGUUCCUGGUG	23	Medtr1g007650.1	| hypothetical protein | LC | chr1:477307-479589 | 20130731	2.5	-1	1	23	258	280	UAAUCUCUGAAAUGUUCCUGGUG	.:..::::: .:::.::::.:::	UAUUAGGAAAGUUUUAGAGGUUA	Cleavage	1
Cluster_169	UCACCCGUAUCACUAUUGGUCUG	23	Medtr4g092590.1	| branched-chain amino acid aminotransferase | HC | chr4:36714479-36717923 | 20130731	2.5	-1	1	23	149	171	UCACCCGUAUCACUAUUGGUCUG	:..: :::::::.::::::	GGUUCUGAAAGUGAUAUGGGUGA	Cleavage	1
Cluster_169	UCACCCGUAUCACUAUUGGUCUG	23	Medtr1g107540.1	| phosphatidylinositol-3,4,5-trisphosphate 3-phosphatase | HC | chr1:48866540-48859494 | 20130731	2.5	-1	1	23	2104	2126	UCACCCGUAUCACUAUUGGUCUG	:: : :: :::::::::::::.	GAGCCAAAAAGUGAUACGGGUGG	Cleavage	1
Cluster_1693	UAUUGAAUGAACCUGAUUGCCU	22	Medtr8g102190.3	| 6-phosphofructokinase | HC | chr8:42981094-42976603 | 20130731	2.5	-1	1	22	679	700	UAUUGAAUGAACCUGAUUGCCU	::::::::::.:: .::::	AAUCAAUCAGGUUUAUAUAAUA	Cleavage	1
Cluster_1693	UAUUGAAUGAACCUGAUUGCCU	22	Medtr8g102190.2	| 6-phosphofructokinase | HC | chr8:42981076-42976738 | 20130731	2.5	-1	1	22	661	682	UAUUGAAUGAACCUGAUUGCCU	::::::::::.:: .::::	AAUCAAUCAGGUUUAUAUAAUA	Cleavage	1
Cluster_1693	UAUUGAAUGAACCUGAUUGCCU	22	Medtr8g102190.1	| 6-phosphofructokinase | HC | chr8:42981094-42976603 | 20130731	2.5	-1	1	22	679	700	UAUUGAAUGAACCUGAUUGCCU	::::::::::.:: .::::	AAUCAAUCAGGUUUAUAUAAUA	Cleavage	1
Cluster_1694	UAUUGUAGAGUGUUGAAAG	19	Medtr1g080460.1	| glucuronosyltransferase PGSIP8 | HC | chr1:35796648-35801186 | 20130731	2.5	-1	1	19	677	695	UAUUGUAGAGUGUUGAAAG	::::: :::::.::.:::.	CUUUCCACACUUUAUAAUG	Cleavage	1
Cluster_1694	UAUUGUAGAGUGUUGAAAG	19	Medtr2g462000.1	| COBRA-like protein 2 precursor | HC | chr2:25654474-25657261 | 20130731	2.5	-1	1	19	742	760	UAUUGUAGAGUGUUGAAAG	.: ::::::.::::::::.	UUAUCAACAUUCUACAAUG	Cleavage	1
Cluster_1694	UAUUGUAGAGUGUUGAAAG	19	Medtr8g446580.1	| hypothetical protein | LC | chr8:18238723-18240870 | 20130731	2.5	-1	1	19	1784	1802	UAUUGUAGAGUGUUGAAAG	:::::::.:::.:.::::	CUUUCAAUACUUUGCAAUC	Cleavage	1
Cluster_1694	UAUUGUAGAGUGUUGAAAG	19	Medtr8g446610.1	| hypothetical protein | LC | chr8:18248174-18250321 | 20130731	2.5	-1	1	19	1784	1802	UAUUGUAGAGUGUUGAAAG	:::::::.:::.:.::::	CUUUCAAUACUUUGCAAUC	Cleavage	1
Cluster_1694	UAUUGUAGAGUGUUGAAAG	19	Medtr4g053410.3	| methyltransferase type 11 | HC | chr4:19395743-19391074 | 20130731	2.5	-1	1	19	589	607	UAUUGUAGAGUGUUGAAAG	::::.::.:.::::.:.::	CUUUUAAUAUUCUAUAGUA	Cleavage	1
Cluster_1694	UAUUGUAGAGUGUUGAAAG	19	Medtr7g039400.1	| hypothetical protein | LC | chr7:14638761-14636548 | 20130731	2.5	-1	1	19	1844	1862	UAUUGUAGAGUGUUGAAAG	::::::.::::.:.::::	CUUUCAGCACUUUGCAAUC	Cleavage	1
Cluster_1694	UAUUGUAGAGUGUUGAAAG	19	Medtr2g015725.1	| hypothetical protein | LC | chr2:4694095-4695110 | 20130731	2.5	-1	1	19	5	23	UAUUGUAGAGUGUUGAAAG	::: ::::::.:::::::	AUUUAAACACUUUACAAUA	Cleavage	1
Cluster_1694	UAUUGUAGAGUGUUGAAAG	19	Medtr5g058780.1	| hypothetical protein | LC | chr5:24293187-24292366 | 20130731	2.5	-1	1	19	185	203	UAUUGUAGAGUGUUGAAAG	:::::::.:::.:.::::	CUUUCAAUACUUUGCAAUC	Cleavage	1
Cluster_1694	UAUUGUAGAGUGUUGAAAG	19	Medtr1g038730.1	| hypothetical protein | LC | chr1:14276039-14273955 | 20130731	2.5	-1	1	19	1844	1862	UAUUGUAGAGUGUUGAAAG	::::::.::::.:.::::	CUUUCAGCACUUUGCAAUC	Cleavage	1
Cluster_1694	UAUUGUAGAGUGUUGAAAG	19	Medtr2g014690.1	| Pol-like polyprotein/retrotransposon, putative | LC | chr2:4240748-4238986 | 20130731	2.5	-1	1	19	533	551	UAUUGUAGAGUGUUGAAAG	:::::::::::::::::	CUUUCAACACUCUACAAAU	Cleavage	1
Cluster_1695	UAUUAUUCUAAUGAUCAUGGUACU	24	Medtr1g077840.1	| OPT family oligopeptide transporter | HC | chr1:34785116-34788483 | 20130731	2.5	-1	1	24	295	318	UAUUAUUCUAAUGAUCAUGGUACU	: .::::: :::.::::::::	GUGAGUAUGAUGAUUGGAAUAAUA	Cleavage	1
Cluster_1695	UAUUAUUCUAAUGAUCAUGGUACU	24	Medtr1g081780.1	| ubiquitin-binding WIYLD domain protein | HC | chr1:36393981-36397256 | 20130731	2.5	-1	1	24	1221	1244	UAUUAUUCUAAUGAUCAUGGUACU	::::::.::::::.: :::	GGAUACAUGAUUAUUAGAGUUAUA	Cleavage	1
Cluster_1697	UCCAUUAUAAAGUCUGAAG	19	Medtr1g035690.1	| dishevelled/Egl-10/leckstrin domain protein | HC | chr1:13018970-13025183 | 20130731	2.5	-1	1	19	1665	1683	UCCAUUAUAAAGUCUGAAG	:::..::::::.::::::	CUUUGGACUUUGUAAUGGC	Cleavage	1
Cluster_1697	UCCAUUAUAAAGUCUGAAG	19	Medtr8g033290.1	| dishevelled/Egl-10/leckstrin domain protein | HC | chr8:12828653-12835651 | 20130731	2.5	-1	1	19	1685	1703	UCCAUUAUAAAGUCUGAAG	:::..::::::.::::::	CUUUGGACUUUGUAAUGGU	Cleavage	1
Cluster_1697	UCCAUUAUAAAGUCUGAAG	19	Medtr5g096150.1	| red chlorophyll catabolite reductase, putative | HC | chr5:42035639-42033043 | 20130731	2.5	-1	1	19	379	397	UCCAUUAUAAAGUCUGAAG	:: .:::::::.::::::.	CUAUAGACUUUGUAAUGGG	Cleavage	1
Cluster_1698	UCGACUCUAUUUUUCCUAUUGGU	23	Medtr3g107810.1	| specific tissue protein | LC | chr3:49747415-49743944 | 20130731	2.5	-1	1	23	548	570	UCGACUCUAUUUUUCCUAUUGGU	::.::.:::::.:.::.::	CUUUAUGGGGAAAAUGGGGUUGA	Cleavage	1
Cluster_1698	UCGACUCUAUUUUUCCUAUUGGU	23	Medtr3g084980.1	| MADS-box transcription factor | HC | chr3:38396688-38400340 | 20130731	2.5	-1	1	23	3	25	UCGACUCUAUUUUUCCUAUUGGU	:: :::::.:.::::::.::	GGGAAGAGGAAGAGUAGAGUUGA	Cleavage	1
Cluster_1699	UAGCUUCUUUUAGUGGUGCGGCCU	24	Medtr5g015540.1	| BTB/POZ domain plant-like protein, putative | HC | chr5:5402272-5394918 | 20130731	2.5	-1	1	24	983	1006	UAGCUUCUUUUAGUGGUGCGGCCU	.:::: ::: ::::::::::	AAAAUGCACAACUUAAAGAAGCUA	Translation	1
Cluster_1699	UAGCUUCUUUUAGUGGUGCGGCCU	24	Medtr8g023770.1	| inactive purple acid phosphatase-like protein | HC | chr8:8640566-8642741 | 20130731	2.5	-1	1	24	977	1000	UAGCUUCUUUUAGUGGUGCGGCCU	: ::.:::: ::::::::::.	GACCGGCGCCACAAAAAGAAGCUG	Cleavage	1
Cluster_1699	UAGCUUCUUUUAGUGGUGCGGCCU	24	Medtr8g023780.3	| inactive purple acid phosphatase-like protein | HC | chr8:8646808-8650223 | 20130731	2.5	-1	1	24	1044	1067	UAGCUUCUUUUAGUGGUGCGGCCU	: ::.:::: ::::::::::.	GACCGGCGCCACAAAAAGAAGCUG	Cleavage	1
Cluster_1699	UAGCUUCUUUUAGUGGUGCGGCCU	24	Medtr8g023780.2	| inactive purple acid phosphatase-like protein | HC | chr8:8646811-8650185 | 20130731	2.5	-1	1	24	1041	1064	UAGCUUCUUUUAGUGGUGCGGCCU	: ::.:::: ::::::::::.	GACCGGCGCCACAAAAAGAAGCUG	Cleavage	1
Cluster_1699	UAGCUUCUUUUAGUGGUGCGGCCU	24	Medtr8g023780.1	| inactive purple acid phosphatase-like protein | HC | chr8:8646811-8650223 | 20130731	2.5	-1	1	24	1041	1064	UAGCUUCUUUUAGUGGUGCGGCCU	: ::.:::: ::::::::::.	GACCGGCGCCACAAAAAGAAGCUG	Cleavage	1
Cluster_1701	UAGCCACUGUUGAUUAUUUGAUG	23	Medtr3g039910.1	| Rab3 GTPase-activating protein catalytic subunit | LC | chr3:13948256-13950884 | 20130731	2.5	-1	1	23	282	304	UAGCCACUGUUGAUUAUUUGAUG	::: ::::::: :::::::	AAGAAAAGAAUCAACUGUGGCUA	Cleavage	1
Cluster_1701	UAGCCACUGUUGAUUAUUUGAUG	23	Medtr3g452470.1	| TB2/DP1, HVA22 family protein | HC | chr3:19188202-19190098 | 20130731	2.5	-1	1	23	184	206	UAGCCACUGUUGAUUAUUUGAUG	:.:.:.::.::::.::::::::	CGUUAGAUGAUCAGCAGUGGCUC	Cleavage	1
Cluster_1701	UAGCCACUGUUGAUUAUUUGAUG	23	Medtr5g091800.1	| TB2/DP1, HVA22 family protein | HC | chr5:40062158-40063517 | 20130731	2.5	-1	1	23	200	222	UAGCCACUGUUGAUUAUUUGAUG	: :.:.::.: ::::::::::::	CCUUAGAUGACCAACAGUGGCUA	Cleavage	1
Cluster_1701	UAGCCACUGUUGAUUAUUUGAUG	23	Medtr6g013240.1	| F-box protein, putative | LC | chr6:4166127-4161406 | 20130731	2.5	-1	1	23	1243	1265	UAGCCACUGUUGAUUAUUUGAUG	:::::::..:: :::::::	UUGAAAAUAAUUGACUGUGGCUA	Cleavage	1
Cluster_1701	UAGCCACUGUUGAUUAUUUGAUG	23	Medtr4g128410.1	| xyloglucan endotransglucosylase/hydrolase family protein | HC | chr4:53492188-53493399 | 20130731	2.5	-1	1	23	165	187	UAGCCACUGUUGAUUAUUUGAUG	: ::::: ::::::::::: :	GCUAAAAUACUCAACAGUGGCCA	Cleavage	1
Cluster_1701	UAGCCACUGUUGAUUAUUUGAUG	23	Medtr6g013380.1	| F-box protein, putative | LC | chr6:4226692-4223085 | 20130731	2.5	-1	1	23	1228	1250	UAGCCACUGUUGAUUAUUUGAUG	:::::::..:: :::::::	UUGAAAAUAAUUGACUGUGGCUA	Cleavage	1
Cluster_1702	CUGAUUCGGUAUUUACAUAGCA	22	Medtr8g070520.3	| macronuclear actin | HC | chr8:29967945-29962242 | 20130731	2.5	-1	1	22	718	739	CUGAUUCGGUAUUUACAUAGCA	::::: .::::::::::::	CACUAUGAUGAUACCGAAUCAG	Cleavage	1
Cluster_1702	CUGAUUCGGUAUUUACAUAGCA	22	Medtr7g027170.1	| hypothetical protein | LC | chr7:9084666-9082804 | 20130731	2.5	-1	1	22	391	412	CUGAUUCGGUAUUUACAUAGCA	:.:.:: :::::..:::::::	GGUUGUGGAAAUAUUGAAUCAG	Cleavage	1
Cluster_1702	CUGAUUCGGUAUUUACAUAGCA	22	Medtr8g070520.4	| macronuclear actin | HC | chr8:29967945-29962242 | 20130731	2.5	-1	1	22	718	739	CUGAUUCGGUAUUUACAUAGCA	::::: .::::::::::::	CACUAUGAUGAUACCGAAUCAG	Cleavage	1
Cluster_1702	CUGAUUCGGUAUUUACAUAGCA	22	Medtr8g070520.2	| macronuclear actin | HC | chr8:29967945-29962242 | 20130731	2.5	-1	1	22	718	739	CUGAUUCGGUAUUUACAUAGCA	::::: .::::::::::::	CACUAUGAUGAUACCGAAUCAG	Cleavage	1
Cluster_1702	CUGAUUCGGUAUUUACAUAGCA	22	Medtr8g070520.1	| macronuclear actin | HC | chr8:29967945-29962242 | 20130731	2.5	-1	1	22	718	739	CUGAUUCGGUAUUUACAUAGCA	::::: .::::::::::::	CACUAUGAUGAUACCGAAUCAG	Cleavage	1
Cluster_1703	UUCAUAUAAAUAAAUCUGUCUGCU	24	Medtr0015s0140.2	| serine/threonine phosphatase family, 2C domain protein | HC | scaffold0015:72134-69714 | 20130731	2.5	-1	1	24	175	198	UUCAUAUAAAUAAAUCUGUCUGCU	::: .:::.:::::.::::	UUGGCACAUGUUUGUUUAUGUGAA	Cleavage	1
Cluster_1703	UUCAUAUAAAUAAAUCUGUCUGCU	24	Medtr1g028580.1	| plastid division PDV1-like protein, putative | HC | chr1:9695401-9690415 | 20130731	2.5	-1	1	24	323	346	UUCAUAUAAAUAAAUCUGUCUGCU	::.: :::.:::::.::::	CGGUAACGGUUUUGUUUAUGUGAA	Cleavage	1
Cluster_1703	UUCAUAUAAAUAAAUCUGUCUGCU	24	Medtr4g075250.1	| ubiquitin-conjugating enzyme/RWD-like protein | HC | chr4:28738871-28737155 | 20130731	2.5	-1	1	24	1553	1576	UUCAUAUAAAUAAAUCUGUCUGCU	.: ::::::::: ::::::::	CUUAUACAGAUUUAAUUAUAUGAU	Translation	1
Cluster_1705	UGCACAGAAGAUCAUUCCAGGAAC	24	Medtr7g107350.1	| pre-mRNA-splicing factor RSE1-like protein | HC | chr7:43803096-43788689 | 20130731	2.5	-1	1	24	1386	1409	UGCACAGAAGAUCAUUCCAGGAAC	:::::: :.::::::::.::::.:	GUUCCUAGGAUGAUCUUUUGUGUA	Cleavage	1
Cluster_1705	UGCACAGAAGAUCAUUCCAGGAAC	24	Medtr7g107350.2	| pre-mRNA-splicing factor RSE1-like protein | HC | chr7:43803096-43794473 | 20130731	2.5	-1	1	24	1386	1409	UGCACAGAAGAUCAUUCCAGGAAC	:::::: :.::::::::.::::.:	GUUCCUAGGAUGAUCUUUUGUGUA	Cleavage	1
Cluster_1705	UGCACAGAAGAUCAUUCCAGGAAC	24	Medtr7g107350.3	| pre-mRNA-splicing factor RSE1-like protein | HC | chr7:43800656-43788689 | 20130731	2.5	-1	1	24	986	1009	UGCACAGAAGAUCAUUCCAGGAAC	:::::: :.::::::::.::::.:	GUUCCUAGGAUGAUCUUUUGUGUA	Cleavage	1
Cluster_1705	UGCACAGAAGAUCAUUCCAGGAAC	24	Medtr7g107350.4	| pre-mRNA-splicing factor RSE1-like protein | HC | chr7:43803096-43792653 | 20130731	2.5	-1	1	24	1386	1409	UGCACAGAAGAUCAUUCCAGGAAC	:::::: :.::::::::.::::.:	GUUCCUAGGAUGAUCUUUUGUGUA	Cleavage	1
Cluster_1706	UCCACAAUCCUUCUGGACG	19	Medtr7g035165.1	| transmembrane protein, putative | LC | chr7:13336263-13335847 | 20130731	2.5	-1	1	19	199	217	UCCACAAUCCUUCUGGACG	::: :::.::::::::::	CGUAGAGAGGGAUUGUGGA	Cleavage	1
Cluster_1707	AAUCUGUAGUAUUGGCACAAAU	22	Medtr1g085900.1	| hypothetical protein | LC | chr1:38449313-38450309 | 20130731	2.5	-1	1	22	55	76	AAUCUGUAGUAUUGGCACAAAU	::::: :::.:::::::::	GAUUGUGAGAAUGCUACAGAUU	Cleavage	1
Cluster_1707	AAUCUGUAGUAUUGGCACAAAU	22	Medtr3g050060.2	| microtubule-associated TORTIFOLIA-like protein | HC | chr3:19709809-19717265 | 20130731	2.5	-1	1	22	1751	1772	AAUCUGUAGUAUUGGCACAAAU	:: ::::::::.:.:::.::	GGUUCUGCCAAUAUUGCAGGUU	Cleavage	1
Cluster_1707	AAUCUGUAGUAUUGGCACAAAU	22	Medtr3g050060.1	| microtubule-associated TORTIFOLIA-like protein | HC | chr3:19709809-19717288 | 20130731	2.5	-1	1	22	1784	1805	AAUCUGUAGUAUUGGCACAAAU	:: ::::::::.:.:::.::	GGUUCUGCCAAUAUUGCAGGUU	Cleavage	1
Cluster_1707	AAUCUGUAGUAUUGGCACAAAU	22	Medtr5g065130.1	| cysteine-rich receptor-kinase-like protein | LC | chr5:27371987-27367690 | 20130731	2.5	-1	1	22	536	557	AAUCUGUAGUAUUGGCACAAAU	: :::. :::::::::::::	GAUGGUGUGAAUACUACAGAUU	Cleavage	1
Cluster_1711	UCCUGUAACUGAAUCUGAAUGUUGC	25	Medtr2g048210.1	| outer arm dynein light chain 1 | HC | chr2:21236166-21209346 | 20130731	2.5	-1	1	25	4209	4233	UCCUGUAACUGAAUCUGAAUGUUGC	:.:::::::::::::...::	AGUUCGUUCAGAUUCAGUUGUGGGC	Cleavage	1
Cluster_1711	UCCUGUAACUGAAUCUGAAUGUUGC	25	Medtr1g054885.1	| photosystem one accumulation protein | HC | chr1:24065884-24068179 | 20130731	2.5	-1	1	25	1704	1728	UCCUGUAACUGAAUCUGAAUGUUGC	:. : .::::: ::::::::::: :	GUUAGGUUCAGUUUCAGUUACAGAA	Cleavage	1
Cluster_1712	AAAUUUCAUAUAGUUCUAGGACCU	24	Medtr8g071040.2	| ubiquitin-conjugating enzyme E2 | HC | chr8:30133617-30129769 | 20130731	2.5	-1	1	24	852	875	AAAUUUCAUAUAGUUCUAGGACCU	..: :::.::::::::.:::	GCAGUUUCGAAUUAUAUGAAGUUU	Cleavage	1
Cluster_1712	AAAUUUCAUAUAGUUCUAGGACCU	24	Medtr8g071040.1	| ubiquitin-conjugating enzyme E2 | HC | chr8:30133617-30129759 | 20130731	2.5	-1	1	24	714	737	AAAUUUCAUAUAGUUCUAGGACCU	..: :::.::::::::.:::	GCAGUUUCGAAUUAUAUGAAGUUU	Cleavage	1
Cluster_1712	AAAUUUCAUAUAGUUCUAGGACCU	24	Medtr7g098750.3	| drug resistance transporter-like ABC domain protein | HC | chr7:39553271-39544790 | 20130731	2.5	-1	1	24	40	63	AAAUUUCAUAUAGUUCUAGGACCU	.::: .:.::::::.:::::	GUUGUCUAAGAUUAUAUGGAAUUU	Cleavage	1
Cluster_1712	AAAUUUCAUAUAGUUCUAGGACCU	24	Medtr7g098750.1	| drug resistance transporter-like ABC domain protein | HC | chr7:39553280-39544755 | 20130731	2.5	-1	1	24	49	72	AAAUUUCAUAUAGUUCUAGGACCU	.::: .:.::::::.:::::	GUUGUCUAAGAUUAUAUGGAAUUU	Cleavage	1
Cluster_1712	AAAUUUCAUAUAGUUCUAGGACCU	24	Medtr4g125490.1	| growth-regulating factor-like protein | HC | chr4:52051634-52053330 | 20130731	2.5	-1	1	24	705	728	AAAUUUCAUAUAGUUCUAGGACCU	:.::.:::::::: :::.:::	ACCUUCUGGAACUAUAAGAAGUUU	Cleavage	1
Cluster_1714	UCUGUAAAUGUCAAGUAUGAGCCU	24	Medtr2g081070.1	| P-loop nucleoside triphosphate hydrolase superfamily protein | HC | chr2:33968303-33978760 | 20130731	2.5	-1	1	24	2361	2384	UCUGUAAAUGUCAAGUAUGAGCCU	.:: ::::::::::::.:.	AUAAGUAUCCUUGACAUUUACGGG	Cleavage	1
Cluster_1714	UCUGUAAAUGUCAAGUAUGAGCCU	24	Medtr6g077680.1	| DNA replication factor CDT1-like protein | LC | chr6:29816274-29809922 | 20130731	2.5	-1	1	24	1708	1731	UCUGUAAAUGUCAAGUAUGAGCCU	:::::::::::::::: :	AUUACAAUACUUGACAUUUACAAA	Cleavage	1
Cluster_1714	UCUGUAAAUGUCAAGUAUGAGCCU	24	Medtr4g099150.1	| fasciclin domain protein | LC | chr4:41062867-41062127 | 20130731	2.5	-1	1	24	693	716	UCUGUAAAUGUCAAGUAUGAGCCU	::::.::::.:::::.::	UGAUGCAUAUUUGAUAUUUAUAGU	Cleavage	1
Cluster_1719	UAUUACUAUUGAAGUUGGUG	20	Medtr4g084950.1	| transmembrane protein, putative | HC | chr4:33169619-33168622 | 20130731	2.5	-1	1	20	868	887	UAUUACUAUUGAAGUUGGUG	:.:::.::.:::::::::	AAUCAAUUUUAAUAGUAAUU	Cleavage	1
Cluster_1719	UAUUACUAUUGAAGUUGGUG	20	Medtr6g009430.1	| myb transcription factor | HC | chr6:2792486-2790201 | 20130731	2.5	-1	1	20	798	817	UAUUACUAUUGAAGUUGGUG	:: .::.::::::::::::.	CAAUAAUUUCAAUAGUAAUG	Cleavage	1
Cluster_1719	UAUUACUAUUGAAGUUGGUG	20	Medtr2g099410.1	| PPR containing plant-like protein | HC | chr2:42622332-42619896 | 20130731	2.5	-1	1	20	279	298	UAUUACUAUUGAAGUUGGUG	:::: :::::::.:::::	AACCACCUUCAAUGGUAAUU	Cleavage	1
Cluster_1719	UAUUACUAUUGAAGUUGGUG	20	Medtr1g097240.1	| cytochrome P450 family protein | HC | chr1:43864496-43861808 | 20130731	2.5	-1	1	20	1475	1494	UAUUACUAUUGAAGUUGGUG	::::.::::.:::::.::	UUCCAAUUUCAGUAGUAGUA	Cleavage	1
Cluster_1719	UAUUACUAUUGAAGUUGGUG	20	Medtr4g064120.1	| GRAS family transcription factor | HC | chr4:23903648-23905939 | 20130731	2.5	-1	1	20	303	322	UAUUACUAUUGAAGUUGGUG	:::::..: :::::::::::	CACCAGUUGCAAUAGUAAUA	Cleavage	1
Cluster_1719	UAUUACUAUUGAAGUUGGUG	20	Medtr2g086890.1	| hypothetical protein | HC | chr2:36521938-36525784 | 20130731	2.5	-1	1	20	345	364	UAUUACUAUUGAAGUUGGUG	:::.:::::::::. :::::	CACUAACUUCAAUGCUAAUA	Cleavage	1
Cluster_1719	UAUUACUAUUGAAGUUGGUG	20	Medtr4g064180.1	| GRAS family transcription factor | HC | chr4:23923635-23921018 | 20130731	2.5	-1	1	20	602	621	UAUUACUAUUGAAGUUGGUG	:::::..: :::::::::::	CACCAGUUGCAAUAGUAAUA	Cleavage	1
Cluster_1719	UAUUACUAUUGAAGUUGGUG	20	Medtr4g064180.2	| GRAS family transcription factor | HC | chr4:23923635-23921018 | 20130731	2.5	-1	1	20	503	522	UAUUACUAUUGAAGUUGGUG	:::::..: :::::::::::	CACCAGUUGCAAUAGUAAUA	Cleavage	1
Cluster_1735	AAAGAAAUUCAUUGGACCCUGGCCU	25	Medtr5g092290.1	| hypothetical protein | LC | chr5:40304579-40305553 | 20130731	2.5	-1	1	25	108	132	AAAGAAAUUCAUUGGACCCUGGCCU	.:: :::::.:::::::::::	AAAUCAUAGUCCAGUGAAUUUCUUU	Cleavage	1
Cluster_1741	UUGUAGAUACUGAAAUUCCUUAUU	24	Medtr4g007750.1	| cyclin-dependent kinase | HC | chr4:1224787-1220985 | 20130731	2.5	-1	1	24	1207	1230	UUGUAGAUACUGAAAUUCCUUAUU	: : :::.::: ::::::::.::	UACAUGGAGUUUAAGUAUCUAUAA	Cleavage	1
Cluster_1759	UGGAGGACGUGGAAUAUCAGGCCU	24	Medtr0209s0060.1	| DUF247 domain protein | HC | scaffold0209:24106-22820 | 20130731	2.5	-1	1	24	1245	1268	UGGAGGACGUGGAAUAUCAGGCCU	.:: :::::::.::::.:.::	AACUCUAAUAUUCCGCGUCUUUCA	Cleavage	1
Cluster_1759	UGGAGGACGUGGAAUAUCAGGCCU	24	Medtr7g111090.1	| bonsai protein | HC | chr7:45580673-45578720 | 20130731	2.5	-1	1	24	235	258	UGGAGGACGUGGAAUAUCAGGCCU	:::: :::::: :::::::	CAAGAUGAUCUUCCACUUCCUCCA	Cleavage	1
Cluster_1759	UGGAGGACGUGGAAUAUCAGGCCU	24	Medtr0209s0030.1	| DUF247 domain protein | HC | scaffold0209:10652-9366 | 20130731	2.5	-1	1	24	1245	1268	UGGAGGACGUGGAAUAUCAGGCCU	.:: :::::::.::::.:.::	AACUCUAAUAUUCCGCGUCUUUCA	Cleavage	1
Cluster_1769	UUCUGUGCACGAACACCUUGGUU	23	Medtr8g035590.1	| calcium-dependent lipid-binding (CaLB domain) family protein | HC | chr8:12977502-12966437 | 20130731	2.5	-1	1	23	757	779	UUCUGUGCACGAACACCUUGGUU	::::: ::::::..::::.	AUUGAAGGUAUUCGUGUGCAGAG	Cleavage	1
Cluster_1769	UUCUGUGCACGAACACCUUGGUU	23	Medtr6g077905.1	| photosystem II reaction center protein D | HC | chr6:29264729-29264511 | 20130731	2.5	-1	1	23	124	146	UUCUGUGCACGAACACCUUGGUU	::. :::::::::::::...::	AAUGAAGGUGUUCGUGCGUGGAU	Cleavage	1
Cluster_1771	UUCCAAGGAUCAAUUUUCUGAACA	24	Medtr2g007840.1	| COP9 signalosome complex subunit 8 | HC | chr2:1159794-1164110 | 20130731	2.5	-1	1	24	739	762	UUCCAAGGAUCAAUUUUCUGAACA	:: :::::: :::::::::: ::	AGUGCAGAAACUUGAUCCUUGCAA	Cleavage	1
Cluster_1771	UUCCAAGGAUCAAUUUUCUGAACA	24	Medtr5g074080.1	| hypothetical protein | HC | chr5:31461516-31462142 | 20130731	2.5	-1	1	24	150	173	UUCCAAGGAUCAAUUUUCUGAACA	:. :::: :::::.:::::::	UCGUUUGAAAUUUGAUUCUUGGAA	Cleavage	1
Cluster_1771	UUCCAAGGAUCAAUUUUCUGAACA	24	Medtr5g073850.1	| transmembrane protein, putative | LC | chr5:31388587-31389211 | 20130731	2.5	-1	1	24	294	317	UUCCAAGGAUCAAUUUUCUGAACA	:. :::: :::::.:::::::	UCGUUUGAAAUUUGAUUCUUGGAA	Cleavage	1
Cluster_1771	UUCCAAGGAUCAAUUUUCUGAACA	24	Medtr6g015865.1	| COBRA-like protein 2 precursor | HC | chr6:5541281-5538764 | 20130731	2.5	-1	1	24	1179	1202	UUCCAAGGAUCAAUUUUCUGAACA	:::.: .: ::::::::::::::	AGUUUAAGACAUUGAUCCUUGGAA	Cleavage	1
Cluster_1771	UUCCAAGGAUCAAUUUUCUGAACA	24	Medtr5g014300.1	| NAC transcription factor-like protein | HC | chr5:4775644-4779821 | 20130731	2.5	-1	1	24	576	599	UUCCAAGGAUCAAUUUUCUGAACA	: : .: ::: :::::::::::.:	UUUCUACAAAUUUGAUCCUUGGGA	Cleavage	1
Cluster_1771	UUCCAAGGAUCAAUUUUCUGAACA	24	Medtr2g007840.2	| COP9 signalosome complex subunit 8 | HC | chr2:1159794-1164110 | 20130731	2.5	-1	1	24	758	781	UUCCAAGGAUCAAUUUUCUGAACA	:: :::::: :::::::::: ::	AGUGCAGAAACUUGAUCCUUGCAA	Cleavage	1
Cluster_1771	UUCCAAGGAUCAAUUUUCUGAACA	24	Medtr3g465160.1	| hypothetical protein | LC | chr3:26364575-26363229 | 20130731	2.5	-1	1	24	66	89	UUCCAAGGAUCAAUUUUCUGAACA	::. :::::::::..::::::	GUCUCGUAAAAUUGAUUUUUGGAA	Cleavage	1
Cluster_1771	UUCCAAGGAUCAAUUUUCUGAACA	24	Medtr3g092100.1	| Rab GTPase activator | HC | chr3:42056500-42051571 | 20130731	2.5	-1	1	24	2164	2187	UUCCAAGGAUCAAUUUUCUGAACA	::.::::::::::::: .:	AAAGAAGGAAAUUGAUCCUUGAGA	Cleavage	1
Cluster_1774	UAGGAUUUCUUUCUGGUAACGGAC	24	Medtr4g117270.1	| RING zinc finger protein, putative | HC | chr4:48594798-48593945 | 20130731	2.5	-1	1	24	789	812	UAGGAUUUCUUUCUGGUAACGGAC	::::.: :::::::::.::	GGGAUUUACUAAAAAGAAAUCUUA	Cleavage	1
Cluster_1774	UAGGAUUUCUUUCUGGUAACGGAC	24	Medtr2g065550.1	| nodulin MtN21/EamA-like transporter family protein | LC | chr2:27493949-27488956 | 20130731	2.5	-1	1	24	178	201	UAGGAUUUCUUUCUGGUAACGGAC	:::.:::..::::::.::.	CUUAUUUAUCAGGGAGAAAUUCUG	Cleavage	1
Cluster_1774	UAGGAUUUCUUUCUGGUAACGGAC	24	Medtr1g098940.1	| ubiquitin interaction motif protein | HC | chr1:44587004-44594599 | 20130731	2.5	-1	1	24	9	32	UAGGAUUUCUUUCUGGUAACGGAC	: .:: :...:::::::::::::	AUAUGUAAUUGGAAAGAAAUCCUA	Cleavage	1
Cluster_1774	UAGGAUUUCUUUCUGGUAACGGAC	24	Medtr2g064740.1	| U5 small nuclear ribonucleoprotein 200 kDa helicase | HC | chr2:29260637-29270804 | 20130731	2.5	-1	1	24	6734	6757	UAGGAUUUCUUUCUGGUAACGGAC	:.: :.:..:::::::::::::	UGCUGAUGCUGGAAAGAAAUCCUA	Cleavage	1
Cluster_1774	UAGGAUUUCUUUCUGGUAACGGAC	24	Medtr4g123537.1	| peptide/nitrate transporter | HC | chr4:51361285-51358738 | 20130731	2.5	-1	1	24	729	752	UAGGAUUUCUUUCUGGUAACGGAC	..:::.:..::::::.::.:::	CAUUGUUGCUGGAAAGAGAUUCUA	Cleavage	1
Cluster_1775	UCAGCAUUGUCUCAGACUAUUGUU	24	Medtr8g465130.1	| transmembrane protein, putative | LC | chr8:23167789-23169635 | 20130731	2.5	-1	1	24	323	347	UCAGCAUUGUCUCAGACUAU-UGUU	::.: ::.::: :::::::::.::.	AAUAUAUGGUCCGAGACAAUGUUGG	Cleavage	1
Cluster_1775	UCAGCAUUGUCUCAGACUAUUGUU	24	Medtr4g102570.1	| hypothetical protein | LC | chr4:42525199-42525829 | 20130731	2.5	-1	1	24	201	224	UCAGCAUUGUCUCAGACUAUUGUU	::::.: ::.:::::::::	UGAUUUAGUUUUAGGCAAUGCUGA	Cleavage	1
Cluster_18	UUCCUAGUUCUCAUACUGUAGCU	23	Medtr4g023230.1	| plant phosphoribosyltransferase carboxy-terminal protein | LC | chr4:7833449-7832788 | 20130731	2.5	-1	1	23	148	170	UUCCUAGUUCUCAUACUGUAGCU	:::: :::::::: :::::	ACUCACAGCAUGAGAACAAGGAA	Cleavage	1
Cluster_1808	AAUUUUCCAGUUCGUACGAUAGAC	24	Medtr5g069205.1	| heavy metal associated domain protein, putative | HC | chr5:29294303-29294988 | 20130731	2.5	-1	1	24	18	41	AAUUUUCCAGUUCGUACGAUAGAC	.:::.::.::::: ::::::::	ACUUAUUGUGCGAACCGGAAAAUU	Cleavage	1
Cluster_181	AGGACGAGAAGAAACUGAACAGG	23	Medtr8g104850.1	| O-fucosyltransferase family protein | HC | chr8:44167811-44170712 | 20130731	2.5	-1	1	23	688	710	AGGACGAGAAGAAACUGAACAGG	: : ::.:::::::::: :::.:	CGUCUUUAGUUUCUUCUAGUCUU	Cleavage	1
Cluster_181	AGGACGAGAAGAAACUGAACAGG	23	Medtr4g073560.2	| ADP-ribosylation factor family protein | LC | chr4:27897411-27894691 | 20130731	2.5	-1	1	23	35	57	AGGACGAGAAGAAACUGAACAGG	: :::: :::::::::: ::::	GCGGUUCCGUUUCUUCUCAUCCU	Cleavage	1
Cluster_1829	UGGCAUAUCAAAGGUGAUG	19	Medtr8g479390.1	| multi-copper oxidase-like protein | HC | chr8:33847327-33843582 | 20130731	2.5	-1	1	19	1688	1706	UGGCAUAUCAAAGGUGAUG	:::::::::: :::::..:	CAUCACCUUUAAUAUGUUA	Cleavage	1
Cluster_1829	UGGCAUAUCAAAGGUGAUG	19	Medtr3g011120.1	| F-box protein interaction domain protein | HC | chr3:2702843-2703955 | 20130731	2.5	-1	1	19	642	660	UGGCAUAUCAAAGGUGAUG	:::: .::::::::::::	AAUCAAUUUUGAUAUGCCA	Cleavage	1
Cluster_1829	UGGCAUAUCAAAGGUGAUG	19	Medtr5g024260.1	| F-box protein interaction domain protein | HC | chr5:9763365-9766132 | 20130731	2.5	-1	1	19	717	735	UGGCAUAUCAAAGGUGAUG	:::: .::::::::::::	GAUCAAUUUUGAUAUGCCA	Cleavage	1
Cluster_1829	UGGCAUAUCAAAGGUGAUG	19	Medtr8g105880.1	| DUF241 domain protein | LC | chr8:44691111-44690389 | 20130731	2.5	-1	1	19	173	191	UGGCAUAUCAAAGGUGAUG	:::::.:::::.::::: :	CAUCAUCUUUGGUAUGCAA	Cleavage	1
Cluster_1831	UACCGUGACAUCCAAGAAGAGG	22	Medtr4g075590.1	| major intrinsic protein (MIP) family transporter | HC | chr4:28885867-28887300 | 20130731	2.5	-1	1	22	528	549	UACCGUGACAUCCAAGAAGAGG	:::::.::::.::::::: ::	ACUCUUUUUGGGUGUCACGUUA	Cleavage	1
Cluster_1834	UGAGUAGAGAUCUUGAAUUGUGGU	24	Medtr7g046515.1	| hypothetical protein | LC | chr7:16506580-16504078 | 20130731	2.5	-1	1	24	2026	2049	UGAGUAGAGAUCUUGAAUUGUGGU	.:: :: :::::::::::.::..	UUCAAAACUCAAGAUCUCUGCUUG	Cleavage	1
Cluster_1834	UGAGUAGAGAUCUUGAAUUGUGGU	24	Medtr3g075180.1	| callose synthase-like protein | HC | chr3:34165945-34201581 | 20130731	2.5	-1	1	24	5295	5318	UGAGUAGAGAUCUUGAAUUGUGGU	:::.:::::::.::::.:	CUUGAUAUUUAAGAUCUUUACUUA	Cleavage	1
Cluster_1834	UGAGUAGAGAUCUUGAAUUGUGGU	24	Medtr8g021370.1	| transmembrane protein, putative | LC | chr8:7673501-7675237 | 20130731	2.5	-1	1	24	475	498	UGAGUAGAGAUCUUGAAUUGUGGU	:.:..:::::::::::: :..:::	AUCGUAAUUCAAGAUCUAUGUUCA	Cleavage	1
Cluster_1834	UGAGUAGAGAUCUUGAAUUGUGGU	24	Medtr3g075180.2	| callose synthase-like protein | HC | chr3:34165623-34201082 | 20130731	2.5	-1	1	24	5623	5646	UGAGUAGAGAUCUUGAAUUGUGGU	:::.:::::::.::::.:	CUUGAUAUUUAAGAUCUUUACUUA	Cleavage	1
Cluster_1845	UACAUAUAAUCCAAAUUGACUGUU	24	Medtr1g111540.1	| MFS transporter | HC | chr1:50392705-50394962 | 20130731	2.5	-1	1	24	1646	1669	UACAUAUAAUCCAAAUUGACUGUU	:::: : :::::::::::::.	GCAAGUCCACUUGGAUUAUAUGUG	Cleavage	1
Cluster_1862	AAAACUGAUCACCAAGAUCUGCACC	25	Medtr6g007773.1	| calmodulin-binding protein | HC | chr6:1962324-1961294 | 20130731	2.5	-1	1	25	531	555	AAAACUGAUCACCAAGAUCUGCACC	: ::. ::: :::::::: ::::::	GUUGUUGAUGUUGGUGAUGAGUUUU	Cleavage	1
Cluster_1862	AAAACUGAUCACCAAGAUCUGCACC	25	Medtr5g081250.2	| folylpolyglutamate synthase | HC | chr5:34805635-34811083 | 20130731	2.5	-1	1	25	298	322	AAAACUGAUCACCAAGAUCUGCACC	::: : ::.::::::::::::::	GGUACCAAUUUUGGUGAUCAGUUUG	Cleavage	1
Cluster_1862	AAAACUGAUCACCAAGAUCUGCACC	25	Medtr5g081250.1	| folylpolyglutamate synthase | HC | chr5:34805635-34811083 | 20130731	2.5	-1	1	25	298	322	AAAACUGAUCACCAAGAUCUGCACC	::: : ::.::::::::::::::	GGUACCAAUUUUGGUGAUCAGUUUG	Cleavage	1
Cluster_1879	UCAUGAUUGCUGAAUCUCUUGGUC	24	Medtr7g084170.1	| hypothetical protein | HC | chr7:32458921-32465350 | 20130731	2.5	-1	1	24	1490	1513	UCAUGAUUGCUGAAUCUCUUGGUC	: : ::::::::: :.::.::::	AAACUAGAGAUUCAACGAUUAUGA	Translation	1
Cluster_1879	UCAUGAUUGCUGAAUCUCUUGGUC	24	Medtr4g102170.1	| cytoplasmic ribosomal protein S13 | HC | chr4:42351426-42353751 | 20130731	2.5	-1	1	24	98	121	UCAUGAUUGCUGAAUCUCUUGGUC	.:. : :: :::::::::::::.	AGCUCAAAGCUUCAGCAAUCAUGG	Cleavage	1
Cluster_1879	UCAUGAUUGCUGAAUCUCUUGGUC	24	Medtr3g064310.1	| CASP POPTRDRAFT-like protein | HC | chr3:28945240-28941390 | 20130731	2.5	-1	1	24	564	587	UCAUGAUUGCUGAAUCUCUUGGUC	.:::: ::::::::::.::::	UUUCAAGCUAUUCAGCAAUUAUGA	Cleavage	1
Cluster_1879	UCAUGAUUGCUGAAUCUCUUGGUC	24	Medtr5g036740.1	| F-box/LRR protein | LC | chr5:16053749-16052817 | 20130731	2.5	-1	1	24	294	317	UCAUGAUUGCUGAAUCUCUUGGUC	:...::.:::::.::::: ::::	UAUUGAGGGAUUCGGCAAUGAUGA	Cleavage	1
Cluster_1879	UCAUGAUUGCUGAAUCUCUUGGUC	24	Medtr7g084170.3	| hypothetical protein | HC | chr7:32457372-32465667 | 20130731	2.5	-1	1	24	2673	2696	UCAUGAUUGCUGAAUCUCUUGGUC	: : ::::::::: :.::.::::	AAACUAGAGAUUCAACGAUUAUGA	Translation	1
Cluster_1879	UCAUGAUUGCUGAAUCUCUUGGUC	24	Medtr7g084170.2	| hypothetical protein | HC | chr7:32457371-32465667 | 20130731	2.5	-1	1	24	1762	1785	UCAUGAUUGCUGAAUCUCUUGGUC	: : ::::::::: :.::.::::	AAACUAGAGAUUCAACGAUUAUGA	Translation	1
Cluster_1879	UCAUGAUUGCUGAAUCUCUUGGUC	24	Medtr7g084170.4	| hypothetical protein | HC | chr7:32457371-32465584 | 20130731	2.5	-1	1	24	1794	1817	UCAUGAUUGCUGAAUCUCUUGGUC	: : ::::::::: :.::.::::	AAACUAGAGAUUCAACGAUUAUGA	Translation	1
Cluster_1881	UUGCAGAAAUGUAGGUGGCAUG	22	Medtr4g086370.3	| autophagy protein | HC | chr4:33844760-33827078 | 20130731	2.5	-1	1	22	4414	4436	UUGCAGAAAUGUAG-GUGGCAUG	:.::: ::::::::::::::	GUAGUCACGCUACAUUUCUGCAA	Cleavage	1
Cluster_1881	UUGCAGAAAUGUAGGUGGCAUG	22	Medtr4g086370.1	| autophagy protein | HC | chr4:33844760-33827078 | 20130731	2.5	-1	1	22	4414	4436	UUGCAGAAAUGUAG-GUGGCAUG	:.::: ::::::::::::::	GUAGUCACGCUACAUUUCUGCAA	Cleavage	1
Cluster_1881	UUGCAGAAAUGUAGGUGGCAUG	22	Medtr4g086370.4	| autophagy protein | HC | chr4:33844779-33827034 | 20130731	2.5	-1	1	22	4433	4455	UUGCAGAAAUGUAG-GUGGCAUG	:.::: ::::::::::::::	GUAGUCACGCUACAUUUCUGCAA	Cleavage	1
Cluster_1881	UUGCAGAAAUGUAGGUGGCAUG	22	Medtr4g086370.2	| autophagy protein | HC | chr4:33844779-33827034 | 20130731	2.5	-1	1	22	4433	4455	UUGCAGAAAUGUAG-GUGGCAUG	:.::: ::::::::::::::	GUAGUCACGCUACAUUUCUGCAA	Cleavage	1
Cluster_1893	GCACGGAAACAACAGUAGAAC	21	Medtr7g107270.1	| phosphatidic acid phosphatase (PAP2) family protein | HC | chr7:43755800-43759265 | 20130731	2.5	-1	1	21	374	394	GCACGGAAACAACAGUAGAAC	::: :::::::::.::::	UGUCUUGUGUUGUUUCUGUGC	Cleavage	1
Cluster_1893	GCACGGAAACAACAGUAGAAC	21	Medtr7g107270.2	| phosphatidic acid phosphatase (PAP2) family protein | HC | chr7:43755827-43759219 | 20130731	2.5	-1	1	21	347	367	GCACGGAAACAACAGUAGAAC	::: :::::::::.::::	UGUCUUGUGUUGUUUCUGUGC	Cleavage	1
Cluster_1893	GCACGGAAACAACAGUAGAAC	21	Medtr3g014620.1	| transmembrane protein, putative | HC | chr3:4181710-4181453 | 20130731	2.5	-1	1	21	110	130	GCACGGAAACAACAGUAGAAC	::: :::::::::.::::	UGGCUAGUGUUGUUUCUGUGC	Cleavage	1
Cluster_1894	UAUCAAAGUAGAAUGGAAAG	20	Medtr2g079030.1	| MATE subfamily protein | LC | chr2:33094342-33097785 | 20130731	2.5	-1	1	20	1391	1410	UAUCAAAGUAGAAUGGAAAG	::::..::.:.:::::::.	GUUUCUGUUUUGCUUUGAUG	Cleavage	1
Cluster_1894	UAUCAAAGUAGAAUGGAAAG	20	Medtr0491s0010.1	| receptor-like kinase | LC | scaffold0491:1920-802 | 20130731	2.5	-1	1	20	1075	1094	UAUCAAAGUAGAAUGGAAAG	.:::::.:::::.::: :::	UUUUCCGUUCUAUUUUUAUA	Cleavage	1
Cluster_1894	UAUCAAAGUAGAAUGGAAAG	20	Medtr2g101590.1	| nitrate transporter 1 | HC | chr2:43697296-43704932 | 20130731	2.5	-1	1	20	2319	2338	UAUCAAAGUAGAAUGGAAAG	.:::..:::.::.::::.::	UUUUUUAUUUUAUUUUGGUA	Cleavage	1
Cluster_1894	UAUCAAAGUAGAAUGGAAAG	20	Medtr7g031900.1	| transmembrane protein, putative | HC | chr7:11215732-11207419 | 20130731	2.5	-1	1	20	2264	2283	UAUCAAAGUAGAAUGGAAAG	.: :.:::::::.::::.::	UUGUUCAUUCUAUUUUGGUA	Cleavage	1
Cluster_1894	UAUCAAAGUAGAAUGGAAAG	20	Medtr2g079020.1	| MATE efflux family protein | HC | chr2:33086136-33090289 | 20130731	2.5	-1	1	20	1058	1077	UAUCAAAGUAGAAUGGAAAG	::::..::.:.:::::::.	GUUUCUGUUUUGCUUUGAUG	Cleavage	1
Cluster_1894	UAUCAAAGUAGAAUGGAAAG	20	Medtr8g104280.1	| N6-adenosine-methyltransferase MT-A70-like protein | HC | chr8:43915370-43911128 | 20130731	2.5	-1	1	20	2869	2888	UAUCAAAGUAGAAUGGAAAG	.:::.: ::::..:::::::	UUUUUCUUUCUGUUUUGAUA	Cleavage	1
Cluster_1894	UAUCAAAGUAGAAUGGAAAG	20	Medtr8g099105.1	| transcription factor, putative | HC | chr8:41634672-41630776 | 20130731	2.5	-1	1	20	2596	2615	UAUCAAAGUAGAAUGGAAAG	:: ::::.::::::::::	AUUAGCAUUUUACUUUGAUA	Cleavage	1
Cluster_1894	UAUCAAAGUAGAAUGGAAAG	20	Medtr1g069845.3	| armadillo/beta-catenin repeat protein | HC | chr1:30528750-30523135 | 20130731	2.5	-1	1	20	2648	2667	UAUCAAAGUAGAAUGGAAAG	:::.: ::::::::::.:.	AUUUUCUUUCUACUUUGGUG	Cleavage	1
Cluster_1894	UAUCAAAGUAGAAUGGAAAG	20	Medtr6g077940.1	| hypothetical protein | HC | chr6:29279953-29282797 | 20130731	2.5	-1	1	20	988	1007	UAUCAAAGUAGAAUGGAAAG	::::..:::.:::::::::	CUUUUUAUUUUACUUUGAUU	Cleavage	1
Cluster_1894	UAUCAAAGUAGAAUGGAAAG	20	Medtr6g077940.2	| hypothetical protein | HC | chr6:29279958-29282797 | 20130731	2.5	-1	1	20	983	1002	UAUCAAAGUAGAAUGGAAAG	::::..:::.:::::::::	CUUUUUAUUUUACUUUGAUU	Cleavage	1
Cluster_1894	UAUCAAAGUAGAAUGGAAAG	20	Medtr1g069845.2	| armadillo/beta-catenin repeat protein | HC | chr1:30528750-30523135 | 20130731	2.5	-1	1	20	2713	2732	UAUCAAAGUAGAAUGGAAAG	:::.: ::::::::::.:.	AUUUUCUUUCUACUUUGGUG	Cleavage	1
Cluster_1906	UGUAAAUAUGAUAUGGACU	19	Medtr2g084230.3	| myb-like DNA-binding domain, shaqkyf class protein | HC | chr2:35399112-35403824 | 20130731	2.5	-1	1	19	1524	1542	UGUAAAUAUGAUAUGGACU	:::.:.:.::::::::::	AGUUCGUGUCAUAUUUACU	Cleavage	1
Cluster_1906	UGUAAAUAUGAUAUGGACU	19	Medtr2g084230.4	| myb-like DNA-binding domain, shaqkyf class protein | HC | chr2:35399112-35403913 | 20130731	2.5	-1	1	19	1490	1508	UGUAAAUAUGAUAUGGACU	:::.:.:.::::::::::	AGUUCGUGUCAUAUUUACU	Cleavage	1
Cluster_1906	UGUAAAUAUGAUAUGGACU	19	Medtr8g012450.1	| cyclin-dependent kinase | HC | chr8:3555782-3564670 | 20130731	2.5	-1	1	19	381	399	UGUAAAUAUGAUAUGGACU	:::..: ::::::::::::	AGUUUAAAUCAUAUUUACA	Cleavage	1
Cluster_1906	UGUAAAUAUGAUAUGGACU	19	Medtr8g468500.1	| LRR receptor-like kinase | HC | chr8:24824387-24829206 | 20130731	2.5	-1	1	19	2755	2773	UGUAAAUAUGAUAUGGACU	:::.: ::::::::::..:	AGUUCCUAUCAUAUUUGUA	Cleavage	1
Cluster_1906	UGUAAAUAUGAUAUGGACU	19	Medtr7g084810.1	| transducin/WD-like repeat-protein | HC | chr7:32739181-32737587 | 20130731	2.5	-1	1	19	996	1014	UGUAAAUAUGAUAUGGACU	:::.: :.::::::::.::	AGUUCUUGUCAUAUUUGCA	Cleavage	1
Cluster_1906	UGUAAAUAUGAUAUGGACU	19	Medtr8g012450.2	| cyclin-dependent kinase | HC | chr8:3555782-3564670 | 20130731	2.5	-1	1	19	381	399	UGUAAAUAUGAUAUGGACU	:::..: ::::::::::::	AGUUUAAAUCAUAUUUACA	Cleavage	1
Cluster_1906	UGUAAAUAUGAUAUGGACU	19	Medtr3g027090.1	| thioredoxin-like protein | HC | chr3:8382516-8384675 | 20130731	2.5	-1	1	19	39	57	UGUAAAUAUGAUAUGGACU	:::.:.::::::::: :::	AGUUCGUAUCAUAUUCACA	Cleavage	1
Cluster_1908	UCAUCUGAAAUGUAGCCUAGGACC	24	Medtr8g014690.1	| LRR receptor-like kinase plant-like protein | LC | chr8:4680255-4685334 | 20130731	2.5	-1	1	24	141	164	UCAUCUGAAAUGUAGCCUAGGACC	: : :: :.:::::::::::::	AGGCAUAAGUUACAUUUCAGAUGC	Cleavage	1
Cluster_1908	UCAUCUGAAAUGUAGCCUAGGACC	24	Medtr2g438220.1	| cellulose synthase-like protein | HC | chr2:15420958-15416303 | 20130731	2.5	-1	1	24	876	899	UCAUCUGAAAUGUAGCCUAGGACC	::::. : ::::.:::::::::::	GGUCUCAUGCUAUAUUUCAGAUGA	Cleavage	1
Cluster_1908	UCAUCUGAAAUGUAGCCUAGGACC	24	Medtr8g014690.2	| LRR receptor-like kinase plant-like protein | LC | chr8:4680193-4685451 | 20130731	2.5	-1	1	24	203	226	UCAUCUGAAAUGUAGCCUAGGACC	: : :: :.:::::::::::::	AGGCAUAAGUUACAUUUCAGAUGC	Cleavage	1
Cluster_1915	UCAAUACGAACAGGAACCAAGACCC	25	Medtr3g053000.1	| PPR containing plant-like protein | HC | chr3:21005019-21000734 | 20130731	2.5	-1	1	25	528	552	UCAAUACGAACAGGAACCAAGACCC	: : ::: :::.:::::::.:::.	UGAUAUUGCUUCUUGUUCGUGUUGG	Cleavage	1
Cluster_1916	UCAUAAACUGAUACAUGAAGGCCU	24	Medtr5g090940.1	| disease resistance protein (TIR-NBS-LRR class) | HC | chr5:39619088-39625198 | 20130731	2.5	-1	1	24	2992	3015	UCAUAAACUGAUACAUGAAGGCCU	::::::.:.:::::.:::	ACAAAAUCAUGUGUUAGUUUGUGA	Cleavage	1
Cluster_1916	UCAUAAACUGAUACAUGAAGGCCU	24	Medtr2g043230.1	| GroES chaperonin | HC | chr2:18824191-18827678 | 20130731	2.5	-1	1	24	1125	1148	UCAUAAACUGAUACAUGAAGGCCU	:::::::::::::::::	UUGAAUUCAUGUAUCAGUUUAUAG	Cleavage	1
Cluster_1916	UCAUAAACUGAUACAUGAAGGCCU	24	Medtr3g074490.1	| substrate carrier family protein | HC | chr3:33673664-33681163 | 20130731	2.5	-1	1	24	1399	1422	UCAUAAACUGAUACAUGAAGGCCU	:::..::::: :::::::::	GUUACUUUGUGUAUGAGUUUAUGA	Translation	1
Cluster_1916	UCAUAAACUGAUACAUGAAGGCCU	24	Medtr3g068065.1	| NAD(P)-binding rossmann-fold protein | HC | chr3:30702360-30698684 | 20130731	2.5	-1	1	24	277	300	UCAUAAACUGAUACAUGAAGGCCU	::.::: ::::::::.:::	UUCUGUUUAUGGAUCAGUUUGUGA	Cleavage	1
Cluster_1917	UCUGUUGUAAUUUUGUCCUUGGUA	24	Medtr1g094025.1	| plant U-box protein | LC | chr1:42217579-42218941 | 20130731	2.5	-1	1	24	669	692	UCUGUUGUAAUUUUGUCCUUGGUA	:.:: :::::.::::::.::.	AGACGAGAACAAAGUUACAAUAGG	Cleavage	1
Cluster_1917	UCUGUUGUAAUUUUGUCCUUGGUA	24	Medtr1g111660.2	| hypothetical protein | HC | chr1:50472618-50480904 | 20130731	2.5	-1	1	24	2565	2588	UCUGUUGUAAUUUUGUCCUUGGUA	:::: ..:::::.:::::::	AAGGAAGGUUGAAAUUGCAACAGA	Cleavage	1
Cluster_1917	UCUGUUGUAAUUUUGUCCUUGGUA	24	Medtr1g111660.1	| hypothetical protein | HC | chr1:50472618-50483033 | 20130731	2.5	-1	1	24	2565	2588	UCUGUUGUAAUUUUGUCCUUGGUA	:::: ..:::::.:::::::	AAGGAAGGUUGAAAUUGCAACAGA	Cleavage	1
Cluster_1926	UCACAAUAGGAUUAGGAUUG	20	Medtr7g108590.1	| TPR repeat protein | HC | chr7:44238334-44242357 | 20130731	2.5	-1	1	20	383	402	UCACAAUAGGAUUAGGAUUG	::::::::::::.::: :.	GAAUCCUAAUCCUGUUGAGG	Cleavage	1
Cluster_1926	UCACAAUAGGAUUAGGAUUG	20	Medtr7g108590.2	| TPR repeat protein | HC | chr7:44238334-44242350 | 20130731	2.5	-1	1	20	383	402	UCACAAUAGGAUUAGGAUUG	::::::::::::.::: :.	GAAUCCUAAUCCUGUUGAGG	Cleavage	1
Cluster_1926	UCACAAUAGGAUUAGGAUUG	20	Medtr4g107030.1	| nonsense-mediated mRNA decay NMD3 family protein | HC | chr4:43995360-43996798 | 20130731	2.5	-1	1	20	768	787	UCACAAUAGGAUUAGGAUUG	:::: .:..:::::::::::	CAAUAUUGGUCCUAUUGUGA	Cleavage	1
Cluster_1926	UCACAAUAGGAUUAGGAUUG	20	Medtr7g108590.3	| TPR repeat protein | HC | chr7:44238334-44242339 | 20130731	2.5	-1	1	20	383	402	UCACAAUAGGAUUAGGAUUG	::::::::::::.::: :.	GAAUCCUAAUCCUGUUGAGG	Cleavage	1
Cluster_1926	UCACAAUAGGAUUAGGAUUG	20	Medtr8g076950.1	| UPF0261 SACE-like protein | HC | chr8:32660930-32654902 | 20130731	2.5	-1	1	20	2174	2193	UCACAAUAGGAUUAGGAUUG	:::::::::: ::::::::	CAAUCCUAAUGCUAUUGUGU	Translation	1
Cluster_1926	UCACAAUAGGAUUAGGAUUG	20	Medtr3g064880.1	| nonsense-mediated mRNA decay NMD3 family protein | HC | chr3:29269880-29272912 | 20130731	2.5	-1	1	20	949	968	UCACAAUAGGAUUAGGAUUG	::: .:..:::::::::::	AAAUAUUGGUCCUAUUGUGA	Cleavage	1
Cluster_1926	UCACAAUAGGAUUAGGAUUG	20	Medtr0052s0110.1	| rRNA intron-encoded homing endonuclease, putative | HC | scaffold0052:50226-47921 | 20130731	2.5	-1	1	20	696	715	UCACAAUAGGAUUAGGAUUG	.::.::.:::::::::::	GGAUUCUGAUCCUAUUGUGU	Cleavage	1
Cluster_1926	UCACAAUAGGAUUAGGAUUG	20	Medtr0055s0130.1	| hypothetical protein | HC | scaffold0055:73353-68450 | 20130731	2.5	-1	1	20	1566	1585	UCACAAUAGGAUUAGGAUUG	.::.::.:::::::::::	AGAUUCUGAUCCUAUUGUGU	Cleavage	1
Cluster_1926	UCACAAUAGGAUUAGGAUUG	20	Medtr7g108320.1	| histone H2A 6 | HC | chr7:44072343-44071492 | 20130731	2.5	-1	1	20	626	645	UCACAAUAGGAUUAGGAUUG	.:::.::.:..::::::::	AGAUCUUAGUUUUAUUGUGA	Cleavage	1
Cluster_1934	AACUUGGUAUUUUAAGACG	19	Medtr3g108670.1	| transmembrane protein, putative | HC | chr3:50193540-50192034 | 20130731	2.5	-1	1	19	323	341	AACUUGGUAUUUUAAGACG	: :.::..:::::::::::	CCUUUUGGAAUACCAAGUU	Cleavage	1
Cluster_1934	AACUUGGUAUUUUAAGACG	19	Medtr5g076310.1	| P-loop nucleoside triphosphate hydrolase superfamily protein | LC | chr5:32527815-32524102 | 20130731	2.5	-1	1	19	1441	1459	AACUUGGUAUUUUAAGACG	.: ::::::.:::.:::::	UGCCUUAAAGUACUAAGUU	Cleavage	1
Cluster_194	UGAGGAUGAUAGAUUACUACU	21	Medtr7g073680.1	| thioredoxin | HC | chr7:27551391-27546525 | 20130731	2.5	-1	1	21	30	50	UGAGGAUGAUAGAUUACUACU	:::::::::::: :::::	ACCAGUAAUCUAUCAACCUCA	Cleavage	1
Cluster_194	UGAGGAUGAUAGAUUACUACU	21	Medtr5g011600.1	| AT hook motif DNA-binding family protein | LC | chr5:3368888-3369401 | 20130731	2.5	-1	1	21	280	300	UGAGGAUGAUAGAUUACUACU	:: ::::.:.:::::.:::	CUUAAUAAUUUGUCAUCUUCA	Cleavage	1
Cluster_1944	UACGGACCAUAUCCCAACAGGACA	24	Medtr6g071140.2	| NF-X1-type zinc finger protein NFXL1 | HC | chr6:26281287-26286488 | 20130731	2.5	-1	1	24	846	869	UACGGACCAUAUCCCAACAGGACA	:: ..:::: ::::::::.::::	UGAUUUGUUAUGAUAUGGUUCGUA	Cleavage	1
Cluster_1944	UACGGACCAUAUCCCAACAGGACA	24	Medtr6g071140.1	| NF-X1-type zinc finger protein NFXL1 | HC | chr6:26281287-26286488 | 20130731	2.5	-1	1	24	843	866	UACGGACCAUAUCCCAACAGGACA	:: ..:::: ::::::::.::::	UGAUUUGUUAUGAUAUGGUUCGUA	Cleavage	1
Cluster_1946	UCUAAUAAUCCAAGCUGUUGUACU	24	Medtr5g091930.2	| citrate synthase 3, peroxisomal protein | HC | chr5:40119197-40123930 | 20130731	2.5	-1	1	24	772	795	UCUAAUAAUCCAAGCUGUUGUACU	::.:::: ::::::::.::	AAACAAAUAGCUCGGAUUAUUGGA	Cleavage	1
Cluster_1946	UCUAAUAAUCCAAGCUGUUGUACU	24	Medtr5g091930.3	| citrate synthase 3, peroxisomal protein | HC | chr5:40119197-40123930 | 20130731	2.5	-1	1	24	772	795	UCUAAUAAUCCAAGCUGUUGUACU	::.:::: ::::::::.::	AAACAAAUAGCUCGGAUUAUUGGA	Cleavage	1
Cluster_1946	UCUAAUAAUCCAAGCUGUUGUACU	24	Medtr5g091930.1	| citrate synthase 3, peroxisomal protein | HC | chr5:40119197-40123930 | 20130731	2.5	-1	1	24	772	795	UCUAAUAAUCCAAGCUGUUGUACU	::.:::: ::::::::.::	AAACAAAUAGCUCGGAUUAUUGGA	Cleavage	1
Cluster_1947	AAUUCGUAUGUCGACGUCUUGAC	23	Medtr7g056450.2	| S-locus lectin kinase family protein | LC | chr7:20007929-20004468 | 20130731	2.5	-1	1	23	1788	1810	AAUUCGUAUGUCGACGUCUUGAC	::::.::.::..:::::.::	GAAAAGAUGUUGAUGUACGAGUU	Cleavage	1
Cluster_1947	AAUUCGUAUGUCGACGUCUUGAC	23	Medtr7g056450.1	| S-locus lectin kinase family protein | LC | chr7:20007888-20004563 | 20130731	2.5	-1	1	23	1747	1769	AAUUCGUAUGUCGACGUCUUGAC	::::.::.::..:::::.::	GAAAAGAUGUUGAUGUACGAGUU	Cleavage	1
Cluster_195	GUUUCUGGCAGAAGGCACCA	20	Medtr8g098695.2	| transport inhibitor response 1 protein | HC | chr8:41205889-41202322 | 20130731	2.5	-1	1	20	1753	1772	GUUUCUGGCAGAAGGCACCA	:::: :::.::::.:::.:	CGGUGGCUUUUGCCGGAAGC	Cleavage	1
Cluster_195	GUUUCUGGCAGAAGGCACCA	20	Medtr8g098695.1	| transport inhibitor response 1 protein | HC | chr8:41205889-41202322 | 20130731	2.5	-1	1	20	1753	1772	GUUUCUGGCAGAAGGCACCA	:::: :::.::::.:::.:	CGGUGGCUUUUGCCGGAAGC	Cleavage	1
Cluster_1953	UCAAACUGAACCGCCAGCCCCUGG	24	Medtr1g023035.1	| peptide N-acetyl-beta-D-glucosaminyl asparaginase amidase A | HC | chr1:7292229-7294186 | 20130731	2.5	-1	1	24	962	985	UCAAACUGAACCGCCAGCCCCUGG	::.:: .:::::::::::.	GACAAGGUUGUUGGUUCAGUUUGG	Cleavage	1
Cluster_1954	UGGACCCAAUAGAGACAAGUAGC	23	Medtr3g462790.1	| MYB transcription factor MYB51 | HC | chr3:25114892-25117876 | 20130731	2.5	-1	1	23	1483	1505	UGGACCCAAUAGAGACAAGUAGC	: : ::::.:::::::::::..	ACAAGUUGUUUCUAUUGGGUCUG	Cleavage	1
Cluster_1955	UUACUACUGAUAUUUGGACUUCAG	24	Medtr1g019590.1	| EF-hand pair protein | LC | chr1:5934153-5934744 | 20130731	2.5	-1	1	24	394	417	UUACUACUGAUAUUUGGACUUCAG	.: .:::::::. ::.::::::::	UUAGAGUCCAAGAAUUAGUAGUAA	Cleavage	1
Cluster_1965	UAUGAUUUUUAUCUUAGGCCUGG	23	Medtr5g089110.2	| F-box plant-like protein | HC | chr5:38730456-38725757 | 20130731	2.5	-1	1	23	2747	2769	UAUGAUUUUUAUCUUAGGCCUGG	:.:::::: ::::::.:::	CUUUGUCUAAGAAAAAAAUUAUA	Translation	1
Cluster_1992	UAUAAAUAUCUACUUGGCUACUG	23	Medtr1g051230.1	| condensin complex subunit 1 | HC | chr1:20027112-20017618 | 20130731	2.5	-1	1	23	2594	2616	UAUAAAUAUCUACUUGGCUACUG	:::..:::::::.:::::	GCAAAGCUGAGUAGAUGUUUAUU	Cleavage	1
Cluster_1993	UCUACUUUCAUGGAGGACU	19	Medtr5g074790.1	| transmembrane protein, putative | LC | chr5:31776559-31772776 | 20130731	2.5	-1	1	19	579	597	UCUACUUUCAUGGAGGACU	: ::.:::::::.:::.::	AUUCUUCCAUGAGAGUGGA	Cleavage	1
Cluster_2001	CUAGAGAAUUGGUAUAAGAAC	21	Medtr5g048470.1	| flavonol synthase/flavanone 3-hydroxylase | HC | chr5:21208958-21213009 | 20130731	2.5	-1	1	19	1	19	CUAGAGAAUUGGUAUAAGA	::::::::.::::. ::::	UCUUAUACUAAUUUACUAG	Cleavage	1
Cluster_2001	CUAGAGAAUUGGUAUAAGAAC	21	Medtr3g095570.2	| autophagy-related protein | HC | chr3:43677624-43671041 | 20130731	2.5	-1	1	21	2970	2990	CUAGAGAAUUGGUAUAAGAAC	:::: :::.::::::.:.:	UCUCUUCUACUAAUUCUUUGG	Cleavage	1
Cluster_2001	CUAGAGAAUUGGUAUAAGAAC	21	Medtr7g069840.1	| hypothetical protein | LC | chr7:25747542-25746529 | 20130731	2.5	-1	1	21	542	562	CUAGAGAAUUGGUAUAAGAAC	:::: ::::.::.::.:::::	GUUCAUAUAUCAGUUUUCUAG	Cleavage	1
Cluster_2001	CUAGAGAAUUGGUAUAAGAAC	21	Medtr1g076910.1	| 22.0 kDa class IV heat shock protein | HC | chr1:34323349-34322497 | 20130731	2.5	-1	1	21	101	121	CUAGAGAAUUGGUAUAAGAAC	:::::::::::::::: :	UCGCUUAUACCAAUUCUCUUG	Cleavage	1
Cluster_2001	CUAGAGAAUUGGUAUAAGAAC	21	Medtr4g032670.1	| SNARE associated family protein | HC | chr4:11261721-11269691 | 20130731	2.5	-1	1	21	514	534	CUAGAGAAUUGGUAUAAGAAC	:::::. :.:::::::::.:	UUUCUUGAAUCAAUUCUCUGG	Cleavage	1
Cluster_2005	UACAUAUUCGAAUUUCAGGAGAUG	24	Medtr2g437770.1	| peroxidase family protein | HC | chr2:14910384-14912626 | 20130731	2.5	-1	1	24	89	112	UACAUAUUCGAAUUUCAGGAGAUG	.: :::::::::::::::	AUUAAUCAGAAAUUCGAAUAUGUC	Cleavage	1
Cluster_2005	UACAUAUUCGAAUUUCAGGAGAUG	24	Medtr1g077590.1	| hypothetical protein | LC | chr1:34633831-34632539 | 20130731	2.5	-1	1	24	132	155	UACAUAUUCGAAUUUCAGGAGAUG	..:.:.:: ::::::::::::::	UGUUUUCUCAAAUUCGAAUAUGUU	Cleavage	1
Cluster_2005	UACAUAUUCGAAUUUCAGGAGAUG	24	Medtr5g072520.1	| APO RNA-binding protein | HC | chr5:30879261-30876789 | 20130731	2.5	-1	1	24	30	53	UACAUAUUCGAAUUUCAGGAGAUG	:: ::::::::::: :::::	UGGGUCAUGAAAUUCGAACAUGUA	Cleavage	1
Cluster_2005	UACAUAUUCGAAUUUCAGGAGAUG	24	Medtr3g009400.1	| LRR receptor-like kinase family protein | HC | chr3:2014979-2018832 | 20130731	2.5	-1	1	24	1785	1808	UACAUAUUCGAAUUUCAGGAGAUG	:::::::.::: ::::.::::	UUCCUCCUGAGAUUGGAAUGUGUA	Translation	1
Cluster_2008	AGUAACAAUGUUGAACUGCAACUU	24	Medtr3g012500.1	| DCD (development and cell death) domain protein | HC | chr3:3514058-3507885 | 20130731	2.5	-1	1	24	1333	1356	AGUAACAAUGUUGAACUGCAACUU	:: :::.::::::.:::::: ::	CAGGUGCGGUUCAAUAUUGUUUCU	Cleavage	1
Cluster_2008	AGUAACAAUGUUGAACUGCAACUU	24	Medtr8g016120.3	| adenine nucleotide alpha hydrolase-like domain kinase | HC | chr8:5378718-5382440 | 20130731	2.5	-1	1	24	834	857	AGUAACAAUGUUGAACUGCAACUU	.:: :::::: .:::::::::..:	GAGCUGCAGUGUAACAUUGUUGUU	Cleavage	1
Cluster_2008	AGUAACAAUGUUGAACUGCAACUU	24	Medtr3g012500.2	| DCD (development and cell death) domain protein | HC | chr3:3513952-3507885 | 20130731	2.5	-1	1	24	1750	1773	AGUAACAAUGUUGAACUGCAACUU	:: :::.::::::.:::::: ::	CAGGUGCGGUUCAAUAUUGUUUCU	Cleavage	1
Cluster_2008	AGUAACAAUGUUGAACUGCAACUU	24	Medtr4g107180.1	| pentatricopeptide (PPR) repeat protein | LC | chr4:44263594-44262119 | 20130731	2.5	-1	1	24	20	43	AGUAACAAUGUUGAACUGCAACUU	:: :::::::::::::.:	AUCAACCAUUUCAACAUUGUUAUU	Cleavage	1
Cluster_2008	AGUAACAAUGUUGAACUGCAACUU	24	Medtr8g016120.1	| adenine nucleotide alpha hydrolase-like domain kinase | HC | chr8:5378212-5384152 | 20130731	2.5	-1	1	24	1129	1152	AGUAACAAUGUUGAACUGCAACUU	.:: :::::: .:::::::::..:	GAGCUGCAGUGUAACAUUGUUGUU	Cleavage	1
Cluster_2008	AGUAACAAUGUUGAACUGCAACUU	24	Medtr8g016120.2	| adenine nucleotide alpha hydrolase-like domain kinase | HC | chr8:5378718-5384492 | 20130731	2.5	-1	1	24	834	857	AGUAACAAUGUUGAACUGCAACUU	.:: :::::: .:::::::::..:	GAGCUGCAGUGUAACAUUGUUGUU	Cleavage	1
Cluster_201	UAUAUUAUAUGCUUGCCUUGAAGCC	25	Medtr1g090867.1	| tyrosine phosphatase | HC | chr1:40933723-40926862 | 20130731	2.5	-1	1	25	1475	1499	UAUAUUAUAUGCUUGCCUUGAAGCC	: .: :::::.:::::::.::	GUAGUAGAUGCAAGUAUAUAAUGUA	Cleavage	1
[truncated: 974 more rows]
