# Supplementary material for: Cross-kingdom RNAi adds a new layer of communication to the arbuscular mycorrhizal symbiosis
Source: Research Square preprint supplement (doi:10.21203/rs.3.rs-3423345/v1), 2023-10-17
Supplement: Supplementary file 3 [file 7b9614ae1499d0e54220762a.xlsx]

## Sheet: Sheet1
Supplementary Table 4. List of primers.
Primer	Sequence (5'-3')	Purpose
AGO1-CACC-Forg	caccATGGTCAGGAAGAGGAGAACTGATG	Cloning
AGO1-For primer for:	caccATGGTCAGGAAGAGGAGAAC	Cloning
AGO1-For_mid	GTCACACATCGTGGCAATATG	Cloning
AGO1-Rev_mid	GACCAGCAATGCGATATTTTC	Cloning
AGO1-stop-Rev primer rev (stop codon)	TCAACAGTAGAACATGACCTTC	Cloning
AGO1-Rev primer rev (no stop codon)	ACAGTAGAACATGACCTTCTTG	Cloning
AGO1-877-Rev	GATCCTTCTTAGGCAACTCAGC	PCR Screening
AGO1-1-For	GTCAGGAAGAGGAGAACTGATG	PCR Screening
Mt-AGO1-755-For	AGTGAAGGCAAACCATTTCT	Sequencing
Mt-AGO1-1539-For	AGGGGTACCATGAAGTCTGT	Sequencing
Mt-AGO1-2352-For	AAAATCAATGTGAAGGTTGG	Sequencing
mtr-MIR159b-stem-loop-For	AACCTAATTTGGGGCTCTCCGC	Cloning
mtr-MIR159b-stem-loop-Rev	GTCCAATTTTGGAGCTCCCTTC	Cloning
Rir-2216-RT	GTCGTATCCAGTGCAGGGTCCGAGGTATTCGCACTGGATACGACcgagga	Stem loop RT PCR
Rir-2216-Fw	cggcggTTTTCTTCATCTTCC	Stem loop RT PCR
Rir-196-RT	GTCGTATCCAGTGCAGGGTCCGAGGTATTCGCACTGGATACGACcctgct	Stem loop RT PCR
Rir-196-Fw	cgcgCCCGAGGCTGGAAACAG	Stem loop RT PCR
Rir-434-RT	GTCGTATCCAGTGCAGGGTCCGAGGTATTCGCACTGGATACGACctccca	Stem loop RT PCR
Rir-434-Fw	cggcggTAATGATGAGACTTG	Stem loop RT PCR
mtr-miR399a-RT	GTCGTATCCAGTGCAGGGTCCGAGGTATTCGCACTGGATACGACctgggc	Stem loop RT PCR
mtr-miR399a-Fw	cggcggTGCCAAAGGAGATTT	Stem loop RT PCR
mtr-miR398a-3p-RT	GTCGTATCCAGTGCAGGGTCCGAGGTATTCGCACTGGATACGACaagggg	Stem loop RT PCR
mtr-miR398a-3p-For	cgacgaTGTGTTCTCAGGTCA	Stem loop RT PCR
mtr-miR172a-RT	GTCGTATCCAGTGCAGGGTCCGAGGTATTCGCACTGGATACGACctgcag	Stem loop RT PCR
mtr-miR172a-Fw	cggcggAGAATCCTGATGATG	Stem loop RT PCR
cggcggucggaccaggcuuca	GTCGTATCCAGTGCAGGGTCCGAGGTATTCGCACTGGATACGACggggaa	Stem loop RT PCR
G.S. 5’ RACE Primer F1	AACCTACGCCCATGAACACAA	5' RACE
GS Outer primer R1	GCACGATTTTCAGGCCATGAG	5' RACE
GS Outer primer R2	AACATCCTCTACTCCGCCACA	5' RACE
GS Outer primer R3	TGACGAAAATGGGCCGATCTTC	5' RACE
GS Outer primer R4	GACGGCGTTGGTGGAAGAAT	5' RACE
G.S. 5’ RACE Primer F2 (backup)	AAAACAAGTCGAAAGAAGCCG	5' RACE
WRKY 5' Reverse 5	CTTTCTCCAAGCCCATGAATC	5' RACE
New inner adapter 5 RACE	CACTGCGTTTGCTGGCTTTGATG	5' RACE
WRKY 5' Reverse 6	CCGACGGTGGATATGTCTCTCCTCTACT	5' RACE
RACE adapter FW	CCGAACACTGCGTTTGCTGGC	5' RACE
Mtr-TEF-for	AAGCTAGGAGGTATTGACAAG	qPCR
Mtr-TEF-rev	ACTGTGCAGTAGTACTTGGTG	qPCR
WRKY-For	caccATGTACAAACGTAGATTCAACAC	cloning
WRKY-Rev-Stop	TATCCTGTAATGCCGCTATACT	cloning
Mt-WRKY-real-For2	GGGAGATGAAGAAGAGGGTGG	qPCR
Mt-WRKY-real-Rev2	TCTCCAAGCCCATGAATCCG	qPCR
Scarlet-For	caccATGGTGAGCAAGGGCGAGGCA	cloning
Scarlet-Rev	tcaCGAACCTCTAGATCCGGTGGA	cloning
Primer-I_2216-PCR-Blunt	GTttttcttcatcttcctcctcgAAATTGGACaagggcgaattc
Primer-II_2216	TTcgaggaggaagatgaagaaaaACAAAAAGATCAAGGC
Primer-III_2216	TTcgaggaggaaTTtgaagaaaCTCTAAAAGGAGGTGATAG
Primer-IV_2216	GAGtttcttcaAAttcctcctcgAATTAGGTTggtgaag
PrimerA-2216-PCR-Blunt	caccTAGTAACGGCCGCCAGTGTG
PrimerB-2216-PCR-Blunt	TAGATGCATGCTCGAGCGGCC
Univ-Rev_Shi2005-B	GCGAGCACAGAATTAATACGAC	Stem loop RT PCR
2216-For-Shi2005-B	TTTTCTTCATCTTCCTCCTCG	Stem loop RT PCR
2216-For-B	cggcggTTTTCTTCATCTTCC	Stem loop RT PCR
2216-RT-B	GTCGTATCCAGTGCAGGGTCCGAGGTATTCGCACTGGATACGACcgagga	Stem loop RT PCR
Univ-Rev-B	GTGCAGGGTCCGAGGT	Stem loop RT PCR
AGO1-CACC-myc-For	caccATGGAACAGAAACTGATCTCTGAAGAAGATCTGGTCAGGAAGAGGAGAACTGATG	Cloning
