# Supplementary material for: Cross-kingdom RNAi adds a new layer of communication to the arbuscular mycorrhizal symbiosis
Source: Research Square preprint supplement (doi:10.21203/rs.3.rs-3423345/v1), 2023-10-17
Supplement: Supplementary file 4 [file d364b47baeef506b417b4ebd.xlsx]

## Sheet: Sheet1
Supplementary Table 3. Predicted targets of Rir2216.
sRNA_Acc.	Target_Acc.	Expectation	UPE$	miRNA_start	miRNA_end	Target_start	Target_end	miRNA_aligned_fragment	alignment	Target_aligned_fragment	Inhibition	Target_Desc.	Multiplicity
Rir2216	Medtr2g099480.1	0.0	-1.0	1	21	20	40	UUUUCUUCAUCUUCCUCCUCG	::::::::::::::::::::	AGAGGAGGAAGAUGAAGAAAA	Cleavage	| CTC-interacting domain protein, putative | HC | chr2:42641646-42649233 | 20130731	1
Rir2216	Medtr2g099940.1	1.0	-1.0	1	21	1151	1171	UUUUCUUCAUCUUCCUCCUCG	.::::::::::::::::..::	UGAGGAGGAAGAUGAAGGGAA	Cleavage	| nucleosome assembly protein | HC | chr2:42867059-42870999 | 20130731	1
Rir2216	Medtr1g023965.1	1.0	-1.0	1	21	926	946	UUUUCUUCAUCUUCCUCCUCG	.::::::::.:::::::::.:	UGAGGAGGAGGAUGAAGAAGA	Cleavage	| hypothetical protein | LC | chr1:7741635-7742815 | 20130731	1
Rir2216	Medtr4g028360.2	1.0	-1.0	1	21	620	640	UUUUCUUCAUCUUCCUCCUCG	.::: ::::::::::::::::	UGAGUAGGAAGAUGAAGAAAA	Cleavage	| Lipid transfer protein | HC | chr4:9781345-9779732 | 20130731	1
Rir2216	Medtr2g435530.1	1.0	-1.0	1	21	75	95	UUUUCUUCAUCUUCCUCCUCG	:::::::.:::::::::.:	GAAGGAGGAGGAUGAAGAAGA	Cleavage	| mono/di-acylglycerol lipase, amine-terminal; lipase, class 3 | HC | chr2:13723417-13729638 | 20130731	1
Rir2216	Medtr2g083870.1	1.0	-1.0	1	21	517	537	UUUUCUUCAUCUUCCUCCUCG	::::::.::::::::::.:	AAAGGAGGGAGAUGAAGAAGA	Cleavage	| WRKY family transcription factor | HC | chr2:35206335-35202007 | 20130731	1
Rir2216	Medtr3g111890.2	1.0	-1.0	1	21	99	119	UUUUCUUCAUCUUCCUCCUCG	:: ::::::::::::::::	GAAGAAGGAAGAUGAAGAAAA	Cleavage	| HhH-GPD base excision DNA repair family protein | HC | chr3:52367273-52369676 | 20130731	1
Rir2216	Medtr3g111890.1	1.0	-1.0	1	21	99	119	UUUUCUUCAUCUUCCUCCUCG	:: ::::::::::::::::	GAAGAAGGAAGAUGAAGAAAA	Cleavage	| HhH-GPD base excision DNA repair family protein | HC | chr3:52367273-52371800 | 20130731	1
Rir2216	Medtr8g016250.1	1.0	-1.0	1	21	149	169	UUUUCUUCAUCUUCCUCCUCG	: : :::::::::::::::::	CCAAGAGGAAGAUGAAGAAAA	Cleavage	| hypothetical protein | HC | chr8:5463605-5463811 | 20130731	1
Rir2216	Medtr1g106810.1	1.0	-1.0	1	21	180	200	UUUUCUUCAUCUUCCUCCUCG	:::: ::::::::::::::	UAAGGAAGAAGAUGAAGAAAA	Cleavage	| transmembrane protein, putative | LC | chr1:48096627-48096870 | 20130731	1
Rir2216	Medtr7g031450.1	1.5	-1.0	1	21	3283	3303	UUUUCUUCAUCUUCCUCCUCG	::: :::::::::::::::.:	CGACGAGGAAGAUGAAGAAGA	Cleavage	| tplate-like protein | HC | chr7:10966724-10958207 | 20130731	1
Rir2216	Medtr2g036920.2	1.5	-1.0	1	21	1629	1649	UUUUCUUCAUCUUCCUCCUCG	.:.::::::.:::::::::.:	UGGGGAGGAGGAUGAAGAAGA	Cleavage	| DUF630 family protein | LC | chr2:16026194-16020715 | 20130731	1
Rir2216	Medtr2g036920.1	1.5	-1.0	1	21	1512	1532	UUUUCUUCAUCUUCCUCCUCG	.:.::::::.:::::::::.:	UGGGGAGGAGGAUGAAGAAGA	Cleavage	| DUF630 family protein | LC | chr2:16026164-16020759 | 20130731	1
Rir2216	Medtr8g077860.1	1.5	-1.0	1	21	882	902	UUUUCUUCAUCUUCCUCCUCG	.::::::::::::::.::..:	UGAGGAGGAAGAUGAGGAGGA	Cleavage	| hypothetical protein | HC | chr8:33154020-33149706 | 20130731	1
Rir2216	Medtr8g077860.2	1.5	-1.0	1	21	882	902	UUUUCUUCAUCUUCCUCCUCG	.::::::::::::::.::..:	UGAGGAGGAAGAUGAGGAGGA	Cleavage	| hypothetical protein | HC | chr8:33154020-33149706 | 20130731	1
Rir2216	Medtr4g115890.1	1.5	-1.0	1	21	566	586	UUUUCUUCAUCUUCCUCCUCG	::: :::::::::::::::.:	CGAUGAGGAAGAUGAAGAAGA	Cleavage	| hypothetical protein | HC | chr4:47890024-47888141 | 20130731	1
Rir2216	Medtr8g107730.1	1.5	-1.0	1	21	865	885	UUUUCUUCAUCUUCCUCCUCG	::::::::.:.::.::::::	AGAGGAGGAGGGUGGAGAAAA	Cleavage	| hypothetical protein | HC | chr8:45552432-45548426 | 20130731	1
Rir2216	Medtr8g107730.2	1.5	-1.0	1	21	644	664	UUUUCUUCAUCUUCCUCCUCG	::::::::.:.::.::::::	AGAGGAGGAGGGUGGAGAAAA	Cleavage	| hypothetical protein | HC | chr8:45551520-45548426 | 20130731	1
Rir2216	Medtr3g466820.1	1.5	-1.0	1	21	475	495	UUUUCUUCAUCUUCCUCCUCG	::::: ::::::::::::.:	AGAGGAUGAAGAUGAAGAAGA	Cleavage	| insulin-degrading enzyme | HC | chr3:27516028-27503943 | 20130731	2
Rir2216	Medtr5g082880.1	1.5	-1.0	1	21	756	776	UUUUCUUCAUCUUCCUCCUCG	::::: ::::::::::::.:	AGAGGAAGAAGAUGAAGAAGA	Cleavage	| Pmr5/Cas1p GDSL/SGNH-like acyl-esterase family protein | HC | chr5:35687660-35691318 | 20130731	1
Rir2216	Medtr8g026680.1	1.5	-1.0	1	21	508	528	UUUUCUUCAUCUUCCUCCUCG	::::: ::::::::::::.:	AGAGGAAGAAGAUGAAGAAGA	Cleavage	| Rac GTPase activating protein | HC | chr8:9249397-9245785 | 20130731	1
Rir2216	Medtr4g116545.2	1.5	-1.0	1	21	300	320	UUUUCUUCAUCUUCCUCCUCG	:: ::::::::::::::::.	AGAAGAGGAAGAUGAAGAAAG	Cleavage	| class II knotted-like homeobox protein | HC | chr4:48287117-48281416 | 20130731	1
Rir2216	Medtr4g116545.1	1.5	-1.0	1	21	328	348	UUUUCUUCAUCUUCCUCCUCG	:: ::::::::::::::::.	AGAAGAGGAAGAUGAAGAAAG	Cleavage	| class II knotted-like homeobox protein | HC | chr4:48287145-48281416 | 20130731	1
Rir2216	Medtr5g045370.1	1.5	-1.0	1	21	138	158	UUUUCUUCAUCUUCCUCCUCG	:: :::::::::::::::.:	AGAAGAGGAAGAUGAAGAAGA	Cleavage	| ninja-family protein AFP1 | HC | chr5:19912802-19918237 | 20130731	1
Rir2216	Medtr1g083860.1	1.5	-1.0	1	21	426	446	UUUUCUUCAUCUUCCUCCUCG	::::: ::::::::::::.:	AGAGGAAGAAGAUGAAGAAGA	Cleavage	| DUF1645 family protein | HC | chr1:37352030-37354647 | 20130731	1
Rir2216	Medtr7g015190.3	1.5	-1.0	1	21	238	258	UUUUCUUCAUCUUCCUCCUCG	::::: ::::::::::::.:	AGAGGAAGAAGAUGAAGAAGA	Cleavage	| NLI interacting factor-like phosphatase | LC | chr7:4609245-4604070 | 20130731	1
Rir2216	Medtr7g015190.4	1.5	-1.0	1	21	224	244	UUUUCUUCAUCUUCCUCCUCG	::::: ::::::::::::.:	AGAGGAAGAAGAUGAAGAAGA	Cleavage	| NLI interacting factor-like phosphatase | LC | chr7:4609231-4604070 | 20130731	1
Rir2216	Medtr7g015190.2	1.5	-1.0	1	21	238	258	UUUUCUUCAUCUUCCUCCUCG	::::: ::::::::::::.:	AGAGGAAGAAGAUGAAGAAGA	Cleavage	| NLI interacting factor-like phosphatase | LC | chr7:4609245-4604070 | 20130731	1
Rir2216	Medtr3g023230.1	1.5	-1.0	1	21	450	470	UUUUCUUCAUCUUCCUCCUCG	::::: :::::::::::::.	GGAGGAAGAAGAUGAAGAAAG	Cleavage	| hypothetical protein | LC | chr3:7026649-7022204 | 20130731	1
Rir2216	Medtr1g069865.1	1.5	-1.0	1	21	495	515	UUUUCUUCAUCUUCCUCCUCG	:.::: ::::::::::::::	GGGGGAAGAAGAUGAAGAAAA	Cleavage	| hypothetical protein | LC | chr1:30553406-30548825 | 20130731	1
Rir2216	Medtr1g007920.1	1.5	-1.0	1	21	836	856	UUUUCUUCAUCUUCCUCCUCG	::::::::::::::::.:	AAUGGAGGAAGAUGAAGAAGA	Cleavage	| IQ calmodulin-binding motif protein | HC | chr1:627735-623232 | 20130731	1
Rir2216	Medtr1g007920.2	1.5	-1.0	1	21	510	530	UUUUCUUCAUCUUCCUCCUCG	::::::::::::::::.:	AAUGGAGGAAGAUGAAGAAGA	Cleavage	| IQ calmodulin-binding motif protein | HC | chr1:627150-623265 | 20130731	1
Rir2216	Medtr1g103400.2	1.5	-1.0	1	21	250	270	UUUUCUUCAUCUUCCUCCUCG	.::::::::::::.:::.:	AAGGGAGGAAGAUGAGGAAGA	Cleavage	| vicilin 47 kDa protein | HC | chr1:46807938-46810830 | 20130731	1
Rir2216	Medtr1g103400.1	1.5	-1.0	1	21	250	270	UUUUCUUCAUCUUCCUCCUCG	.::::::::::::.:::.:	AAGGGAGGAAGAUGAGGAAGA	Cleavage	| vicilin 47 kDa protein | HC | chr1:46807938-46810830 | 20130731	1
Rir2216	Medtr7g007890.1	1.5	-1.0	1	21	280	300	UUUUCUUCAUCUUCCUCCUCG	::::::::::::.:::..:	GAAGGAGGAAGAUGGAGAGGA	Cleavage	| apoptosis antagonizing transcription factor | HC | chr7:1740066-1747241 | 20130731	1
Rir2216	Medtr3g113110.1	1.5	-1.0	1	21	4872	4892	UUUUCUUCAUCUUCCUCCUCG	:::: :.::::::::::::	GAAGGAAGGAGAUGAAGAAAA	Cleavage	| ATP-binding microtubule motor family protein | LC | chr3:52843767-52851675 | 20130731	1
Rir2216	Medtr2g005820.1	2.0	-1.0	1	21	1623	1643	UUUUCUUCAUCUUCCUCCUCG	::::::::::::::.:::...	CGAGGAGGAAGAUGGAGAGGG	Cleavage	| bromodomain protein | HC | chr2:325936-330633 | 20130731	1
Rir2216	Medtr3g466820.1	2.0	-1.0	1	21	418	438	UUUUCUUCAUCUUCCUCCUCG	.:::::::: :::::::::.:	UGAGGAGGAUGAUGAAGAAGA	Cleavage	| insulin-degrading enzyme | HC | chr3:27516028-27503943 | 20130731	2
Rir2216	Medtr4g094795.1	2.0	-1.0	1	21	1752	1772	UUUUCUUCAUCUUCCUCCUCG	::: :::::::::::::::..	CGACGAGGAAGAUGAAGAAGG	Cleavage	| zinc finger, C3HC4 type (RING finger) protein | HC | chr4:39016144-39012687 | 20130731	1
Rir2216	Medtr2g025620.1	2.0	-1.0	1	21	951	971	UUUUCUUCAUCUUCCUCCUCG	.::::::::.:::::::: ::	UGAGGAGGAGGAUGAAGAUAA	Cleavage	| transcription initiation factor IIF subunit alpha | HC | chr2:9168202-9161990 | 20130731	1
Rir2216	Medtr4g091110.1	2.0	-1.0	1	21	561	581	UUUUCUUCAUCUUCCUCCUCG	.::::::::::: ::::::.:	UGAGGAGGAAGAAGAAGAAGA	Cleavage	| C3HC4-type RING zinc finger protein | LC | chr4:36070700-36067211 | 20130731	1
Rir2216	Medtr7g101270.1	2.0	-1.0	1	21	44	64	UUUUCUUCAUCUUCCUCCUCG	.:::::::::::::: ::::.	UGAGGAGGAAGAUGAUGAAAG	Cleavage	| hypothetical protein | LC | chr7:40866721-40865807 | 20130731	1
Rir2216	Medtr1g107565.2	2.0	-1.0	1	21	693	713	UUUUCUUCAUCUUCCUCCUCG	::::::::.::::::::.:	AGAGGAGGAGGAUGAAGAGAU	Cleavage	| heavy metal-associated domain protein | HC | chr1:48896065-48893528 | 20130731	1
Rir2216	Medtr1g107565.1	2.0	-1.0	1	21	566	586	UUUUCUUCAUCUUCCUCCUCG	::::::::.::::::::.:	AGAGGAGGAGGAUGAAGAGAU	Cleavage	| heavy metal-associated domain protein | HC | chr1:48895819-48893576 | 20130731	1
Rir2216	Medtr5g093560.15	2.0	-1.0	1	21	5003	5023	UUUUCUUCAUCUUCCUCCUCG	:::::::: :::::::::.:	AGAGGAGGAUGAUGAAGAAGA	Cleavage	| SWAP (suppressor-of-white-APricot)/surp domain protein, putative | HC | chr5:40848020-40854378 | 20130731	1
Rir2216	Medtr5g093560.18	2.0	-1.0	1	21	4916	4936	UUUUCUUCAUCUUCCUCCUCG	:::::::: :::::::::.:	AGAGGAGGAUGAUGAAGAAGA	Cleavage	| SWAP (suppressor-of-white-APricot)/surp domain protein, putative | HC | chr5:40848020-40854378 | 20130731	1
Rir2216	Medtr5g093560.11	2.0	-1.0	1	21	4863	4883	UUUUCUUCAUCUUCCUCCUCG	:::::::: :::::::::.:	AGAGGAGGAUGAUGAAGAAGA	Cleavage	| SWAP (suppressor-of-white-APricot)/surp domain protein, putative | HC | chr5:40848020-40854378 | 20130731	1
Rir2216	Medtr5g093560.13	2.0	-1.0	1	21	4858	4878	UUUUCUUCAUCUUCCUCCUCG	:::::::: :::::::::.:	AGAGGAGGAUGAUGAAGAAGA	Cleavage	| SWAP (suppressor-of-white-APricot)/surp domain protein, putative | HC | chr5:40848021-40854378 | 20130731	1
Rir2216	Medtr5g093560.17	2.0	-1.0	1	21	4776	4796	UUUUCUUCAUCUUCCUCCUCG	:::::::: :::::::::.:	AGAGGAGGAUGAUGAAGAAGA	Cleavage	| SWAP (suppressor-of-white-APricot)/surp domain protein, putative | HC | chr5:40848020-40854378 | 20130731	1
Rir2216	Medtr5g093560.5	2.0	-1.0	1	21	4718	4738	UUUUCUUCAUCUUCCUCCUCG	:::::::: :::::::::.:	AGAGGAGGAUGAUGAAGAAGA	Cleavage	| SWAP (suppressor-of-white-APricot)/surp domain protein, putative | HC | chr5:40848021-40854378 | 20130731	1
Rir2216	Medtr5g093560.14	2.0	-1.0	1	21	4692	4712	UUUUCUUCAUCUUCCUCCUCG	:::::::: :::::::::.:	AGAGGAGGAUGAUGAAGAAGA	Cleavage	| SWAP (suppressor-of-white-APricot)/surp domain protein, putative | HC | chr5:40848020-40854378 | 20130731	1
Rir2216	Medtr5g093560.10	2.0	-1.0	1	21	4605	4625	UUUUCUUCAUCUUCCUCCUCG	:::::::: :::::::::.:	AGAGGAGGAUGAUGAAGAAGA	Cleavage	| SWAP (suppressor-of-white-APricot)/surp domain protein, putative | HC | chr5:40848020-40854378 | 20130731	1
Rir2216	Medtr5g093560.6	2.0	-1.0	1	21	4552	4572	UUUUCUUCAUCUUCCUCCUCG	:::::::: :::::::::.:	AGAGGAGGAUGAUGAAGAAGA	Cleavage	| SWAP (suppressor-of-white-APricot)/surp domain protein, putative | HC | chr5:40848020-40854378 | 20130731	1
Rir2216	Medtr5g093560.9	2.0	-1.0	1	21	4544	4564	UUUUCUUCAUCUUCCUCCUCG	:::::::: :::::::::.:	AGAGGAGGAUGAUGAAGAAGA	Cleavage	| SWAP (suppressor-of-white-APricot)/surp domain protein, putative | HC | chr5:40848024-40854378 | 20130731	1
Rir2216	Medtr5g093560.19	2.0	-1.0	1	21	4513	4533	UUUUCUUCAUCUUCCUCCUCG	:::::::: :::::::::.:	AGAGGAGGAUGAUGAAGAAGA	Cleavage	| SWAP (suppressor-of-white-APricot)/surp domain protein, putative | HC | chr5:40848020-40854378 | 20130731	1
Rir2216	Medtr5g093560.4	2.0	-1.0	1	21	4373	4393	UUUUCUUCAUCUUCCUCCUCG	:::::::: :::::::::.:	AGAGGAGGAUGAUGAAGAAGA	Cleavage	| SWAP (suppressor-of-white-APricot)/surp domain protein, putative | HC | chr5:40848020-40854378 | 20130731	1
Rir2216	Medtr4g134620.1	2.0	-1.0	1	21	1173	1193	UUUUCUUCAUCUUCCUCCUCG	:::::::: ::::::::::.	AGAGGAGGAUGAUGAAGAAAG	Cleavage	| cullin-associated NEDD8-dissociated protein | HC | chr4:56405401-56416838 | 20130731	1
Rir2216	Medtr4g134620.2	2.0	-1.0	1	21	1147	1167	UUUUCUUCAUCUUCCUCCUCG	:::::::: ::::::::::.	AGAGGAGGAUGAUGAAGAAAG	Cleavage	| cullin-associated NEDD8-dissociated protein | HC | chr4:56405427-56416838 | 20130731	1
Rir2216	Medtr7g450780.1	2.0	-1.0	1	21	732	752	UUUUCUUCAUCUUCCUCCUCG	::::::::::: :::::.::	GGAGGAGGAAGAAGAAGAGAA	Cleavage	| SNF2 family amine-terminal protein | LC | chr7:16969460-16964457 | 20130731	1
Rir2216	Medtr1g116957.1	2.0	-1.0	1	21	2802	2822	UUUUCUUCAUCUUCCUCCUCG	::::::::.:: ::::::::	AGAGGAGGAGGAAGAAGAAAA	Cleavage	| importin-like protein | HC | chr1:52882908-52894678 | 20130731	1
Rir2216	Medtr5g079680.1	2.0	-1.0	1	21	844	864	UUUUCUUCAUCUUCCUCCUCG	::::::::::.::.::.:.:	GGAGGAGGAAGGUGGAGGAGA	Cleavage	| hypothetical protein | HC | chr5:34077575-34073115 | 20130731	1
Rir2216	Medtr5g093560.2	2.0	-1.0	1	21	2704	2724	UUUUCUUCAUCUUCCUCCUCG	:::::::: :::::::::.:	AGAGGAGGAUGAUGAAGAAGA	Cleavage	| SWAP (suppressor-of-white-APricot)/surp domain protein, putative | HC | chr5:40848020-40854378 | 20130731	1
Rir2216	Medtr5g093560.12	2.0	-1.0	1	21	2663	2683	UUUUCUUCAUCUUCCUCCUCG	:::::::: :::::::::.:	AGAGGAGGAUGAUGAAGAAGA	Cleavage	| SWAP (suppressor-of-white-APricot)/surp domain protein, putative | HC | chr5:40848020-40854378 | 20130731	1
Rir2216	Medtr5g093560.16	2.0	-1.0	1	21	2576	2596	UUUUCUUCAUCUUCCUCCUCG	:::::::: :::::::::.:	AGAGGAGGAUGAUGAAGAAGA	Cleavage	| SWAP (suppressor-of-white-APricot)/surp domain protein, putative | HC | chr5:40848020-40854378 | 20130731	1
Rir2216	Medtr5g093560.8	2.0	-1.0	1	21	2519	2539	UUUUCUUCAUCUUCCUCCUCG	:::::::: :::::::::.:	AGAGGAGGAUGAUGAAGAAGA	Cleavage	| SWAP (suppressor-of-white-APricot)/surp domain protein, putative | HC | chr5:40848020-40854378 | 20130731	1
Rir2216	Medtr5g093560.1	2.0	-1.0	1	21	2173	2193	UUUUCUUCAUCUUCCUCCUCG	:::::::: :::::::::.:	AGAGGAGGAUGAUGAAGAAGA	Cleavage	| SWAP (suppressor-of-white-APricot)/surp domain protein, putative | HC | chr5:40848020-40854592 | 20130731	1
Rir2216	Medtr5g093560.7	2.0	-1.0	1	21	2352	2372	UUUUCUUCAUCUUCCUCCUCG	:::::::: :::::::::.:	AGAGGAGGAUGAUGAAGAAGA	Cleavage	| SWAP (suppressor-of-white-APricot)/surp domain protein, putative | HC | chr5:40848020-40854378 | 20130731	1
Rir2216	Medtr5g093560.3	2.0	-1.0	1	21	2214	2234	UUUUCUUCAUCUUCCUCCUCG	:::::::: :::::::::.:	AGAGGAGGAUGAUGAAGAAGA	Cleavage	| SWAP (suppressor-of-white-APricot)/surp domain protein, putative | HC | chr5:40848020-40854378 | 20130731	1
Rir2216	Medtr7g081705.1	2.0	-1.0	1	21	1249	1269	UUUUCUUCAUCUUCCUCCUCG	::::::::::: ::::::.:	AGAGGAGGAAGAAGAAGAAGA	Cleavage	| BZIP transcription factor bZIP80 | HC | chr7:31344981-31338733 | 20130731	1
Rir2216	Medtr2g014260.1	2.0	-1.0	1	21	306	326	UUUUCUUCAUCUUCCUCCUCG	::::::::::: ::::::.:	GGAGGAGGAAGAAGAAGAAGA	Cleavage	| zinc finger C-x8-C-x5-C-x3-H type protein | HC | chr2:4005657-3999321 | 20130731	2
Rir2216	Medtr2g014260.1	2.0	-1.0	1	21	432	452	UUUUCUUCAUCUUCCUCCUCG	::::::::::: ::::::.:	GGAGGAGGAAGAAGAAGAAGA	Cleavage	| zinc finger C-x8-C-x5-C-x3-H type protein | HC | chr2:4005657-3999321 | 20130731	2
Rir2216	Medtr2g014260.3	2.0	-1.0	1	21	306	326	UUUUCUUCAUCUUCCUCCUCG	::::::::::: ::::::.:	GGAGGAGGAAGAAGAAGAAGA	Cleavage	| zinc finger C-x8-C-x5-C-x3-H type protein | HC | chr2:4005657-3999321 | 20130731	2
Rir2216	Medtr2g014260.3	2.0	-1.0	1	21	432	452	UUUUCUUCAUCUUCCUCCUCG	::::::::::: ::::::.:	GGAGGAGGAAGAAGAAGAAGA	Cleavage	| zinc finger C-x8-C-x5-C-x3-H type protein | HC | chr2:4005657-3999321 | 20130731	2
Rir2216	Medtr2g014260.4	2.0	-1.0	1	21	306	326	UUUUCUUCAUCUUCCUCCUCG	::::::::::: ::::::.:	GGAGGAGGAAGAAGAAGAAGA	Cleavage	| zinc finger C-x8-C-x5-C-x3-H type protein | HC | chr2:4005657-3999321 | 20130731	2
Rir2216	Medtr2g014260.4	2.0	-1.0	1	21	432	452	UUUUCUUCAUCUUCCUCCUCG	::::::::::: ::::::.:	GGAGGAGGAAGAAGAAGAAGA	Cleavage	| zinc finger C-x8-C-x5-C-x3-H type protein | HC | chr2:4005657-3999321 | 20130731	2
Rir2216	Medtr2g014260.2	2.0	-1.0	1	21	306	326	UUUUCUUCAUCUUCCUCCUCG	::::::::::: ::::::.:	GGAGGAGGAAGAAGAAGAAGA	Cleavage	| zinc finger C-x8-C-x5-C-x3-H type protein | HC | chr2:4005657-3999321 | 20130731	2
Rir2216	Medtr2g014260.2	2.0	-1.0	1	21	432	452	UUUUCUUCAUCUUCCUCCUCG	::::::::::: ::::::.:	GGAGGAGGAAGAAGAAGAAGA	Cleavage	| zinc finger C-x8-C-x5-C-x3-H type protein | HC | chr2:4005657-3999321 | 20130731	2
Rir2216	Medtr5g079680.2	2.0	-1.0	1	21	863	883	UUUUCUUCAUCUUCCUCCUCG	::::::::::.::.::.:.:	GGAGGAGGAAGGUGGAGGAGA	Cleavage	| hypothetical protein | HC | chr5:34077594-34074842 | 20130731	1
Rir2216	Medtr7g010360.1	2.0	-1.0	1	21	956	976	UUUUCUUCAUCUUCCUCCUCG	::::::::::: ::::::.:	GGAGGAGGAAGAGGAAGAAGA	Cleavage	| RNA recognition motif, a.k.a. RRM, RBD protein | LC | chr7:2533493-2542856 | 20130731	1
Rir2216	Medtr2g025590.1	2.0	-1.0	1	21	1224	1244	UUUUCUUCAUCUUCCUCCUCG	::::::::.:::::::: ::	GGAGGAGGAGGAUGAAGAUAA	Cleavage	| transcription initiation factor IIF subunit alpha | HC | chr2:9156803-9148860 | 20130731	1
Rir2216	Medtr4g089085.1	2.0	-1.0	1	21	1377	1397	UUUUCUUCAUCUUCCUCCUCG	::::::::::: ::::::.:	AGAGGAGGAAGAGGAAGAAGA	Cleavage	| splicing factor 3B subunit 2 | HC | chr4:35697993-35706063 | 20130731	2
Rir2216	Medtr5g028030.1	2.0	-1.0	1	21	412	432	UUUUCUUCAUCUUCCUCCUCG	::::::::.:::::::..:.	GGAGGAGGAGGAUGAAGGGAG	Cleavage	| transcription elongation factor (TFIIS) family protein | HC | chr5:11713865-11718779 | 20130731	1
Rir2216	Medtr5g064850.1	2.0	-1.0	1	21	314	334	UUUUCUUCAUCUUCCUCCUCG	::::::::::: ::::::.:	GGAGGAGGAAGAGGAAGAAGA	Cleavage	| apoptosis antagonizing transcription factor | HC | chr5:27248469-27256882 | 20130731	1
Rir2216	Medtr5g064850.2	2.0	-1.0	1	21	314	334	UUUUCUUCAUCUUCCUCCUCG	::::::::::: ::::::.:	GGAGGAGGAAGAGGAAGAAGA	Cleavage	| apoptosis antagonizing transcription factor | HC | chr5:27248469-27256851 | 20130731	1
Rir2216	Medtr7g053520.1	2.0	-1.0	1	21	379	399	UUUUCUUCAUCUUCCUCCUCG	::::::::::::: ::::.:	GGAGGAGGAAGAUGUAGAAGA	Cleavage	| 50S ribosomal protein L7/L12 | HC | chr7:18863632-18861167 | 20130731	1
Rir2216	Medtr3g100650.1	2.0	-1.0	1	21	199	219	UUUUCUUCAUCUUCCUCCUCG	::::::::::: ::::::.:	GGAGGAGGAAGAAGAAGAAGA	Cleavage	| homeobox domain, ZF-HD class protein | HC | chr3:46301626-46300635 | 20130731	1
Rir2216	Medtr5g090740.1	2.0	-1.0	1	21	423	443	UUUUCUUCAUCUUCCUCCUCG	::::::::.:.::.::.:::	GGAGGAGGAGGGUGGAGGAAA	Cleavage	| AAA domain protein | HC | chr5:39503827-39504673 | 20130731	1
Rir2216	Medtr1g025810.1	2.0	-1.0	1	21	336	356	UUUUCUUCAUCUUCCUCCUCG	::::::::::: ::::::.:	AGAGGAGGAAGAAGAAGAAGA	Cleavage	| F-box-like protein | LC | chr1:8297751-8297017 | 20130731	3
Rir2216	Medtr1g025810.1	2.0	-1.0	1	21	378	398	UUUUCUUCAUCUUCCUCCUCG	::::::::::: ::::::.:	AGAGGAGGAAGAAGAAGAAGA	Cleavage	| F-box-like protein | LC | chr1:8297751-8297017 | 20130731	3
Rir2216	Medtr1g025810.1	2.0	-1.0	1	21	297	317	UUUUCUUCAUCUUCCUCCUCG	.:: :::::.:::::::::.:	UGAAGAGGAGGAUGAAGAAGA	Cleavage	| F-box-like protein | LC | chr1:8297751-8297017 | 20130731	3
Rir2216	Medtr3g111740.1	2.0	-1.0	1	21	1516	1536	UUUUCUUCAUCUUCCUCCUCG	.:: :::::::::::.::::.	UGACGAGGAAGAUGAGGAAAG	Cleavage	| hypothetical protein | HC | chr3:52274077-52269700 | 20130731	1
Rir2216	Medtr3g111740.2	2.0	-1.0	1	21	1516	1536	UUUUCUUCAUCUUCCUCCUCG	.:: :::::::::::.::::.	UGACGAGGAAGAUGAGGAAAG	Cleavage	| hypothetical protein | HC | chr3:52274077-52270989 | 20130731	1
Rir2216	Medtr8g092425.1	2.0	-1.0	1	21	180	200	UUUUCUUCAUCUUCCUCCUCG	::::::::::: ::::::.:	AGAGGAGGAAGAAGAAGAAGA	Cleavage	| hypothetical protein | HC | chr8:38642462-38638212 | 20130731	2
Rir2216	Medtr8g092425.1	2.0	-1.0	1	21	224	244	UUUUCUUCAUCUUCCUCCUCG	::::::::::: ::::::.:	GGAGGAGGAAGAAGAAGAAGA	Cleavage	| hypothetical protein | HC | chr8:38642462-38638212 | 20130731	2
Rir2216	Medtr7g085600.1	2.0	-1.0	1	21	580	600	UUUUCUUCAUCUUCCUCCUCG	.::: ::::.:::::::.:::	UGAGAAGGAGGAUGAAGGAAA	Cleavage	| chaperone DnaJ domain protein | HC | chr7:33181901-33186268 | 20130731	1
Rir2216	Medtr7g076690.1	2.0	-1.0	1	21	605	625	UUUUCUUCAUCUUCCUCCUCG	.:: :::::::::::.:::.:	UGAAGAGGAAGAUGAGGAAGA	Cleavage	| hypothetical protein | HC | chr7:28903843-28901286 | 20130731	1
Rir2216	Medtr8g088370.1	2.0	-1.0	1	21	3468	3488	UUUUCUUCAUCUUCCUCCUCG	:.::: :::::::::::.::	GGGGGAAGAAGAUGAAGAGAA	Cleavage	| import component Toc86/159, G and M domain protein | HC | chr8:36605419-36610672 | 20130731	2
Rir2216	Medtr4g122270.1	2.0	-1.0	1	21	243	263	UUUUCUUCAUCUUCCUCCUCG	:: ::::::::::.::::.:	GGAAGAGGAAGAUGGAGAAGA	Cleavage	| DNA replication licensing factor MCM2, putative | HC | chr4:50492382-50486664 | 20130731	1
Rir2216	Medtr4g056480.1	2.0	-1.0	1	21	163	183	UUUUCUUCAUCUUCCUCCUCG	:: ::::::::::::::..:	AGACGAGGAAGAUGAAGAGGA	Cleavage	| vacuolar protein sorting protein | HC | chr4:20713510-20696458 | 20130731	1
Rir2216	Medtr4g056480.2	2.0	-1.0	1	21	163	183	UUUUCUUCAUCUUCCUCCUCG	:: ::::::::::::::..:	AGACGAGGAAGAUGAAGAGGA	Cleavage	| vacuolar protein sorting protein | HC | chr4:20713510-20696605 | 20130731	1
Rir2216	Medtr7g069930.1	2.0	-1.0	1	21	400	420	UUUUCUUCAUCUUCCUCCUCG	::: :::::::::::::::	GGAGAAGGAAGAUGAAGAAAU	Cleavage	| hypothetical protein | HC | chr7:25781437-25782731 | 20130731	1
Rir2216	Medtr1g116900.2	2.0	-1.0	1	21	422	442	UUUUCUUCAUCUUCCUCCUCG	:::::: :.:::::::::.:	GGAGGAGAAGGAUGAAGAAGA	Cleavage	| Nse4, component of Smc5/6 DNA repair complex protein | HC | chr1:52801866-52798334 | 20130731	1
Rir2216	Medtr1g116900.1	2.0	-1.0	1	21	482	502	UUUUCUUCAUCUUCCUCCUCG	:::::: :.:::::::::.:	GGAGGAGAAGGAUGAAGAAGA	Cleavage	| Nse4, component of Smc5/6 DNA repair complex protein | HC | chr1:52801926-52798628 | 20130731	1
Rir2216	Medtr8g095330.1	2.0	-1.0	1	21	1569	1589	UUUUCUUCAUCUUCCUCCUCG	:: :::::.:::::::::.:	GGAAGAGGAGGAUGAAGAAGA	Cleavage	| sucrose non-fermenting-like kinase 2 family protein | HC | chr8:39884287-39881032 | 20130731	1
Rir2216	Medtr5g070100.1	2.0	-1.0	1	21	579	599	UUUUCUUCAUCUUCCUCCUCG	:: ::::::::::::::..:	GGAAGAGGAAGAUGAAGAGGA	Cleavage	| RNA recognition motif (RRM) containing protein | HC | chr5:29707444-29702897 | 20130731	1
Rir2216	Medtr0554s0020.1	2.0	-1.0	1	21	795	815	UUUUCUUCAUCUUCCUCCUCG	::::: ::::.:::::::.:	AGAGGAUGAAGGUGAAGAAGA	Cleavage	| cytochrome P450 family 71 protein | HC | scaffold0554:4993-7144 | 20130731	1
Rir2216	Medtr1g418545.1	2.0	-1.0	1	21	780	800	UUUUCUUCAUCUUCCUCCUCG	::: ::::::::::.::.::	GGAGAAGGAAGAUGAGGAGAA	Cleavage	| acyl-CoA-binding domain protein | HC | chr1:5360731-5364929 | 20130731	1
Rir2216	Medtr1g015185.2	2.0	-1.0	1	21	845	865	UUUUCUUCAUCUUCCUCCUCG	:: :::::::::::.:::.:	GGACGAGGAAGAUGAGGAAGA	Cleavage	| PHD finger alfin-like protein | HC | chr1:3751249-3746646 | 20130731	1
Rir2216	Medtr1g015185.1	2.0	-1.0	1	21	816	836	UUUUCUUCAUCUUCCUCCUCG	:: :::::::::::.:::.:	GGACGAGGAAGAUGAGGAAGA	Cleavage	| PHD finger alfin-like protein | HC | chr1:3751255-3746618 | 20130731	1
Rir2216	Medtr4g122830.1	2.0	-1.0	1	21	516	536	UUUUCUUCAUCUUCCUCCUCG	::::: ::::::::::::..	GGAGGAUGAAGAUGAAGAAGG	Cleavage	| hypothetical protein | LC | chr4:50658562-50660740 | 20130731	1
Rir2216	Medtr2g096080.1	2.0	-1.0	1	21	740	760	UUUUCUUCAUCUUCCUCCUCG	::::: ::.:::::::::.:	GGAGGAAGAGGAUGAAGAAGA	Cleavage	| CCT motif protein | HC | chr2:41011109-41013371 | 20130731	1
Rir2216	Medtr8g467390.1	2.0	-1.0	1	21	273	293	UUUUCUUCAUCUUCCUCCUCG	:: ::::::::::.:::::.	AGAAGAGGAAGAUGGAGAAAG	Cleavage	| DUF1666 family protein | LC | chr8:24215397-24217284 | 20130731	1
Rir2216	Medtr2g012310.1	2.0	-1.0	1	21	1200	1220	UUUUCUUCAUCUUCCUCCUCG	.:: :: ::::::::::::::	UGACGAAGAAGAUGAAGAAAA	Cleavage	| Pre-mRNA-splicing factor SYF1-like protein | HC | chr2:3026039-3032585 | 20130731	1
Rir2216	Medtr4g117530.1	2.0	-1.0	1	21	186	206	UUUUCUUCAUCUUCCUCCUCG	:: :::::::::::::::..	GGAAGAGGAAGAUGAAGAAGG	Cleavage	| galactose oxidase | LC | chr4:48735876-48734767 | 20130731	1
Rir2216	Medtr7g117585.1	2.0	-1.0	1	21	93	113	UUUUCUUCAUCUUCCUCCUCG	::::: ::::::::.:::.:	GGAGGAAGAAGAUGAGGAAGA	Cleavage	| B3 DNA-binding domain protein | LC | chr7:48759457-48760428 | 20130731	1
Rir2216	Medtr5g063760.1	2.0	-1.0	1	21	1757	1777	UUUUCUUCAUCUUCCUCCUCG	:::::::::::::::..:	UACGGAGGAAGAUGAAGAGGA	Cleavage	| receptor-like protein | HC | chr5:26452142-26450331 | 20130731	1
Rir2216	Medtr1g100240.1	2.0	-1.0	1	21	1141	1161	UUUUCUUCAUCUUCCUCCUCG	::::::.:::::.:::::	UUAGGAGGGAGAUGGAGAAAU	Cleavage	| P-loop nucleoside triphosphate hydrolase superfamily protein | HC | chr1:45178862-45175352 | 20130731	2
Rir2216	Medtr3g100150.1	2.0	-1.0	1	21	1082	1102	UUUUCUUCAUCUUCCUCCUCG	::::::::.:::::.:::	GAUGGAGGAAGGUGAAGGAAA	Cleavage	| HXXXD-type acyl-transferase family protein | HC | chr3:46009166-46012505 | 20130731	1
Rir2216	Medtr3g008020.1	2.5	-1.0	1	21	98	118	UUUUCUUCAUCUUCCUCCUCG	:::::::::::: :::::..:	CGAGGAGGAAGAGGAAGAGGA	Cleavage	| 8-amino-7-oxononanoate synthase-like protein | HC | chr3:1291558-1284618 | 20130731	1
Rir2216	Medtr7g086640.2	2.5	-1.0	1	21	1161	1181	UUUUCUUCAUCUUCCUCCUCG	:::::: ::::::::::::.	CGAGGAUGAAGAUGAAGAAGU	Cleavage	| polyribonucleotide nucleotidyltransferase | HC | chr7:33669227-33648523 | 20130731	1
Rir2216	Medtr7g086640.1	2.5	-1.0	1	21	1161	1181	UUUUCUUCAUCUUCCUCCUCG	:::::: ::::::::::::.	CGAGGAUGAAGAUGAAGAAGU	Cleavage	| polyribonucleotide nucleotidyltransferase | HC | chr7:33669227-33648523 | 20130731	1
Rir2216	Medtr4g089085.1	2.5	-1.0	1	21	1356	1376	UUUUCUUCAUCUUCCUCCUCG	::::::::::: ::.:::.:	GGAGGAGGAAGAAGAGGAAGA	Cleavage	| splicing factor 3B subunit 2 | HC | chr4:35697993-35706063 | 20130731	2
Rir2216	Medtr5g069000.1	2.5	-1.0	1	21	363	383	UUUUCUUCAUCUUCCUCCUCG	.::::::::: .:::::::.:	UGAGGAGGAAAGUGAAGAAGA	Translation	| AGC family Serine/Threonine kinase family protein | HC | chr5:29199381-29208532 | 20130731	1
Rir2216	Medtr4g035835.1	2.5	-1.0	1	21	186	206	UUUUCUUCAUCUUCCUCCUCG	.::::::::: .:::::::.:	UGAGGAGGAAAGUGAAGAAGA	Translation	| AGC family Serine/Threonine kinase family protein | HC | chr4:12652321-12643253 | 20130731	1
Rir2216	Medtr3g089910.1	2.5	-1.0	1	21	659	679	UUUUCUUCAUCUUCCUCCUCG	.::::::::.:: ::::::.:	UGAGGAGGAGGAGGAAGAAGA	Cleavage	| transcription elongation factor SPT5-like protein, putative | HC | chr3:40863011-40870564 | 20130731	1
Rir2216	Medtr7g112410.1	2.5	-1.0	1	21	721	741	UUUUCUUCAUCUUCCUCCUCG	.::::::::::: :::::..:	UGAGGAGGAAGAGGAAGAGGA	Cleavage	| poxvirus Ag35 surface protein | HC | chr7:46190529-46186663 | 20130731	3
Rir2216	Medtr7g112410.1	2.5	-1.0	1	21	661	681	UUUUCUUCAUCUUCCUCCUCG	::::::::.:: ::::::.:	AGAGGAGGAGGAGGAAGAAGA	Cleavage	| poxvirus Ag35 surface protein | HC | chr7:46190529-46186663 | 20130731	3
Rir2216	Medtr7g112410.1	2.5	-1.0	1	21	769	789	UUUUCUUCAUCUUCCUCCUCG	:: :::::::: ::::::::	GGAAGAGGAAGAGGAAGAAAA	Cleavage	| poxvirus Ag35 surface protein | HC | chr7:46190529-46186663 | 20130731	3
Rir2216	Medtr7g112410.2	2.5	-1.0	1	21	721	741	UUUUCUUCAUCUUCCUCCUCG	.::::::::::: :::::..:	UGAGGAGGAAGAGGAAGAGGA	Cleavage	| poxvirus Ag35 surface protein | HC | chr7:46190529-46186663 | 20130731	3
Rir2216	Medtr7g112410.2	2.5	-1.0	1	21	661	681	UUUUCUUCAUCUUCCUCCUCG	::::::::.:: ::::::.:	AGAGGAGGAGGAGGAAGAAGA	Cleavage	| poxvirus Ag35 surface protein | HC | chr7:46190529-46186663 | 20130731	3
Rir2216	Medtr7g112410.2	2.5	-1.0	1	21	769	789	UUUUCUUCAUCUUCCUCCUCG	:: :::::::: ::::::::	GGAAGAGGAAGAGGAAGAAAA	Cleavage	| poxvirus Ag35 surface protein | HC | chr7:46190529-46186663 | 20130731	3
Rir2216	Medtr2g085330.2	2.5	-1.0	1	21	314	334	UUUUCUUCAUCUUCCUCCUCG	:: ::::::::: ::::::::	CGUGGAGGAAGAAGAAGAAAA	Cleavage	| proton pump interactor, putative | HC | chr2:33213569-33207585 | 20130731	1
Rir2216	Medtr2g028870.1	2.5	-1.0	1	21	445	465	UUUUCUUCAUCUUCCUCCUCG	.::::::::.:: ::::::.:	UGAGGAGGAGGAAGAAGAAGA	Cleavage	| C6HC-type zinc finger RING/U-box protein | HC | chr2:10740321-10734195 | 20130731	1
Rir2216	Medtr4g011920.1	2.5	-1.0	1	21	276	296	UUUUCUUCAUCUUCCUCCUCG	.:::::::.:: :::::::.:	UGAGGAGGGAGUUGAAGAAGA	Translation	| CASC3/barentsz eIF4AIII-binding protein | HC | chr4:3118579-3114309 | 20130731	1
Rir2216	Medtr8g066090.2	2.5	-1.0	1	21	1536	1556	UUUUCUUCAUCUUCCUCCUCG	.::::::::::: ::::::..	UGAGGAGGAAGAAGAAGAAGG	Cleavage	| phosphatidylinositol 3- and 4-kinase | HC | chr8:27445935-27444013 | 20130731	1
Rir2216	Medtr8g066090.3	2.5	-1.0	1	21	1536	1556	UUUUCUUCAUCUUCCUCCUCG	.::::::::::: ::::::..	UGAGGAGGAAGAAGAAGAAGG	Cleavage	| phosphatidylinositol 3- and 4-kinase | HC | chr8:27445935-27444013 | 20130731	1
Rir2216	Medtr8g066090.1	2.5	-1.0	1	21	1536	1556	UUUUCUUCAUCUUCCUCCUCG	.::::::::::: ::::::..	UGAGGAGGAAGAAGAAGAAGG	Cleavage	| phosphatidylinositol 3- and 4-kinase | HC | chr8:27445935-27444013 | 20130731	1
Rir2216	Medtr8g066090.6	2.5	-1.0	1	21	1536	1556	UUUUCUUCAUCUUCCUCCUCG	.::::::::::: ::::::..	UGAGGAGGAAGAAGAAGAAGG	Cleavage	| phosphatidylinositol 3- and 4-kinase | HC | chr8:27445935-27444013 | 20130731	1
Rir2216	Medtr8g066090.4	2.5	-1.0	1	21	1536	1556	UUUUCUUCAUCUUCCUCCUCG	.::::::::::: ::::::..	UGAGGAGGAAGAAGAAGAAGG	Cleavage	| phosphatidylinositol 3- and 4-kinase | HC | chr8:27445935-27444013 | 20130731	1
Rir2216	Medtr8g066090.5	2.5	-1.0	1	21	1536	1556	UUUUCUUCAUCUUCCUCCUCG	.::::::::::: ::::::..	UGAGGAGGAAGAAGAAGAAGG	Cleavage	| phosphatidylinositol 3- and 4-kinase | HC | chr8:27445935-27444013 | 20130731	1
Rir2216	Medtr4g011920.2	2.5	-1.0	1	21	276	296	UUUUCUUCAUCUUCCUCCUCG	.:::::::.:: :::::::.:	UGAGGAGGGAGUUGAAGAAGA	Translation	| CASC3/barentsz eIF4AIII-binding protein | HC | chr4:3118579-3115882 | 20130731	1
Rir2216	Medtr5g022010.1	2.5	-1.0	1	21	934	954	UUUUCUUCAUCUUCCUCCUCG	.::::::::::: ::.:.:::	UGAGGAGGAAGAAGAGGGAAA	Cleavage	| chalcone-flavanone isomerase family protein, putative | HC | chr5:8622022-8620324 | 20130731	2
Rir2216	Medtr5g022010.1	2.5	-1.0	1	21	664	684	UUUUCUUCAUCUUCCUCCUCG	:::::::::::::::.:	AGCUGAGGAAGAUGAAGAAGA	Cleavage	| chalcone-flavanone isomerase family protein, putative | HC | chr5:8622022-8620324 | 20130731	2
Rir2216	Medtr4g046703.1	2.5	-1.0	1	21	594	614	UUUUCUUCAUCUUCCUCCUCG	.:::::::.::. ::::::::	UGAGGAGGGAGGCGAAGAAAA	Cleavage	| hypothetical protein | HC | chr4:16501224-16500354 | 20130731	1
Rir2216	Medtr5g080700.1	2.5	-1.0	1	21	1644	1664	UUUUCUUCAUCUUCCUCCUCG	::::::::.:::::.::.:	GGAGGAGGAGGAUGAGGAGAU	Cleavage	| hypothetical protein | HC | chr5:34551592-34549137 | 20130731	1
Rir2216	Medtr5g080700.2	2.5	-1.0	1	21	1624	1644	UUUUCUUCAUCUUCCUCCUCG	::::::::.:::::.::.:	GGAGGAGGAGGAUGAGGAGAU	Cleavage	| hypothetical protein | HC | chr5:34551592-34549137 | 20130731	1
Rir2216	Medtr7g088140.3	2.5	-1.0	1	21	322	342	UUUUCUUCAUCUUCCUCCUCG	::::::::::: ::.:::.:	GGAGGAGGAAGAGGAGGAAGA	Cleavage	| RNA recognition motif, a.k.a. RRM, RBD protein | HC | chr7:34304385-34297881 | 20130731	1
Rir2216	Medtr8g088370.1	2.5	-1.0	1	21	3410	3430	UUUUCUUCAUCUUCCUCCUCG	:: ::: .::::::::::::	GGAUGAGAGAGAUGAAGAAAA	Cleavage	| import component Toc86/159, G and M domain protein | HC | chr8:36605419-36610672 | 20130731	2
Rir2216	Medtr7g088140.2	2.5	-1.0	1	21	322	342	UUUUCUUCAUCUUCCUCCUCG	::::::::::: ::.:::.:	GGAGGAGGAAGAGGAGGAAGA	Cleavage	| RNA recognition motif, a.k.a. RRM, RBD protein | HC | chr7:34304385-34297881 | 20130731	1
Rir2216	Medtr7g088140.5	2.5	-1.0	1	21	322	342	UUUUCUUCAUCUUCCUCCUCG	::::::::::: ::.:::.:	GGAGGAGGAAGAGGAGGAAGA	Cleavage	| RNA recognition motif, a.k.a. RRM, RBD protein | HC | chr7:34304385-34297914 | 20130731	1
Rir2216	Medtr7g088140.4	2.5	-1.0	1	21	322	342	UUUUCUUCAUCUUCCUCCUCG	::::::::::: ::.:::.:	GGAGGAGGAAGAGGAGGAAGA	Cleavage	| RNA recognition motif, a.k.a. RRM, RBD protein | HC | chr7:34304385-34297914 | 20130731	1
Rir2216	Medtr4g007880.1	2.5	-1.0	1	21	63	83	UUUUCUUCAUCUUCCUCCUCG	.::::::::.::::: :::.:	UGAGGAGGAGGAUGAUGAAGA	Cleavage	| hypothetical protein | LC | chr4:1297473-1297225 | 20130731	1
Rir2216	Medtr2g023280.1	2.5	-1.0	1	21	242	262	UUUUCUUCAUCUUCCUCCUCG	::::::::::: :::::..:	AGAGGAGGAAGAGGAAGAGGA	Cleavage	| DUO pollen-like protein, putative | HC | chr2:8187592-8196160 | 20130731	1
Rir2216	Medtr8g044880.1	2.5	-1.0	1	21	426	446	UUUUCUUCAUCUUCCUCCUCG	:::::::: ::::::::::	AGAGGAGGAUGAUGAAGAAAC	Cleavage	| DUF674 family protein | HC | chr8:17017124-17016168 | 20130731	2
Rir2216	Medtr8g044880.1	2.5	-1.0	1	21	381	401	UUUUCUUCAUCUUCCUCCUCG	: ::::::::::::::: :	UCAAGAGGAAGAUGAAGAAUA	Cleavage	| DUF674 family protein | HC | chr8:17017124-17016168 | 20130731	2
Rir2216	Medtr8g445910.1	2.5	-1.0	1	21	426	446	UUUUCUUCAUCUUCCUCCUCG	:::::::: ::::::::::	AGAGGAGGAUGAUGAAGAAAC	Cleavage	| DUF674 family protein | HC | chr8:17547561-17546605 | 20130731	2
Rir2216	Medtr8g445910.1	2.5	-1.0	1	21	381	401	UUUUCUUCAUCUUCCUCCUCG	: ::::::::::::::: :	UCAAGAGGAAGAUGAAGAAUA	Cleavage	| DUF674 family protein | HC | chr8:17547561-17546605 | 20130731	2
Rir2216	Medtr2g025270.1	2.5	-1.0	1	21	75	95	UUUUCUUCAUCUUCCUCCUCG	.::::::::::: ::.::.::	UGAGGAGGAAGAGGAGGAGAA	Cleavage	| hypothetical protein | HC | chr2:9006976-9007356 | 20130731	1
Rir2216	Medtr7g104800.4	2.5	-1.0	1	21	1130	1150	UUUUCUUCAUCUUCCUCCUCG	::::::::::: ::.:::.:	AGAGGAGGAAGAAGAGGAAGA	Cleavage	| RNA recognition motif, a.k.a. RRM, RBD protein | HC | chr7:42488464-42483010 | 20130731	1
Rir2216	Medtr3g023900.1	2.5	-1.0	1	21	16	36	UUUUCUUCAUCUUCCUCCUCG	::::::::.:: :::::.::	GGAGGAGGAGGAGGAAGAGAA	Cleavage	| AAA-type ATPase family protein | LC | chr3:7310105-7304034 | 20130731	1
Rir2216	Medtr6g043850.1	2.5	-1.0	1	21	1258	1278	UUUUCUUCAUCUUCCUCCUCG	::::::::::: :::::..:	GGAGGAGGAAGAGGAAGAGGA	Cleavage	| plant organelle RNA recognition domain protein | LC | chr6:15115306-15109090 | 20130731	1
Rir2216	Medtr7g104800.2	2.5	-1.0	1	21	785	805	UUUUCUUCAUCUUCCUCCUCG	::::::::::: ::.:::.:	AGAGGAGGAAGAAGAGGAAGA	Cleavage	| RNA recognition motif, a.k.a. RRM, RBD protein | HC | chr7:42489150-42483010 | 20130731	1
Rir2216	Medtr7g104800.3	2.5	-1.0	1	21	578	598	UUUUCUUCAUCUUCCUCCUCG	::::::::::: ::.:::.:	AGAGGAGGAAGAAGAGGAAGA	Cleavage	| RNA recognition motif, a.k.a. RRM, RBD protein | HC | chr7:42489150-42483010 | 20130731	1
Rir2216	Medtr2g013350.1	2.5	-1.0	1	21	1322	1342	UUUUCUUCAUCUUCCUCCUCG	::::::::.:: ::::::.:	GGAGGAGGAGGAGGAAGAAGA	Cleavage	| splicing factor 3B subunit 2 | HC | chr2:3576901-3585046 | 20130731	1
Rir2216	Medtr5g019780.1	2.5	-1.0	1	21	1290	1310	UUUUCUUCAUCUUCCUCCUCG	::::::::::::::: :.:.	GGAGGAGGAAGAUGAAAAGAG	Cleavage	| cupin family protein | LC | chr5:7497091-7500318 | 20130731	1
Rir2216	Medtr7g104800.1	2.5	-1.0	1	21	463	483	UUUUCUUCAUCUUCCUCCUCG	::::::::::: ::.:::.:	AGAGGAGGAAGAAGAGGAAGA	Cleavage	| RNA recognition motif, a.k.a. RRM, RBD protein | HC | chr7:42489150-42483010 | 20130731	1
Rir2216	Medtr8g083140.1	2.5	-1.0	1	21	703	723	UUUUCUUCAUCUUCCUCCUCG	::::::::::: ::.:::.:	GGAGGAGGAAGAGGAGGAAGA	Cleavage	| microfibrillar-associated-like protein | HC | chr8:35121606-35118300 | 20130731	1
Rir2216	Medtr2g013350.3	2.5	-1.0	1	21	1109	1129	UUUUCUUCAUCUUCCUCCUCG	::::::::.:: ::::::.:	GGAGGAGGAGGAGGAAGAAGA	Cleavage	| splicing factor 3B subunit 2 | HC | chr2:3577560-3585046 | 20130731	1
Rir2216	Medtr3g091640.1	2.5	-1.0	1	21	1246	1266	UUUUCUUCAUCUUCCUCCUCG	::::::::.:::::::: .:	AGAGGAGGAGGAUGAAGACGA	Cleavage	| PP2A regulatory subunit TAP46-like protein | HC | chr3:41711352-41715663 | 20130731	1
Rir2216	Medtr7g088140.1	2.5	-1.0	1	21	183	203	UUUUCUUCAUCUUCCUCCUCG	::::::::::: ::.:::.:	GGAGGAGGAAGAGGAGGAAGA	Cleavage	| RNA recognition motif, a.k.a. RRM, RBD protein | HC | chr7:34304246-34300290 | 20130731	1
Rir2216	Medtr2g013350.2	2.5	-1.0	1	21	1114	1134	UUUUCUUCAUCUUCCUCCUCG	::::::::.:: ::::::.:	GGAGGAGGAGGAGGAAGAAGA	Cleavage	| splicing factor 3B subunit 2 | HC | chr2:3577473-3584784 | 20130731	1
Rir2216	Medtr2g079460.1	2.5	-1.0	1	21	487	507	UUUUCUUCAUCUUCCUCCUCG	::::::::::: :.:::::.	AGAGGAGGAAGAAGGAGAAAG	Cleavage	| hypothetical protein | HC | chr2:33443561-33449037 | 20130731	1
Rir2216	Medtr2g072160.1	2.5	-1.0	1	21	1410	1430	UUUUCUUCAUCUUCCUCCUCG	.: :::::::::: :::::::	UGUGGAGGAAGAUCAAGAAAA	Cleavage	| callose synthase-like protein | HC | chr2:30285949-30298851 | 20130731	1
Rir2216	Medtr1g016100.1	2.5	-1.0	1	21	649	669	UUUUCUUCAUCUUCCUCCUCG	::::::::: ::::.:::.:	AGAGGAGGAACAUGAGGAAGA	Translation	| plant/MHM17-10 protein, putative | HC | chr1:4211956-4210484 | 20130731	1
Rir2216	Medtr3g117190.1	2.5	-1.0	1	21	808	828	UUUUCUUCAUCUUCCUCCUCG	::::::::::: ::::::..	GGAGGAGGAAGAAGAAGAAGG	Cleavage	| dehydrin | HC | chr3:54827061-54828347 | 20130731	1
Rir2216	Medtr1g050518.1	2.5	-1.0	1	21	921	941	UUUUCUUCAUCUUCCUCCUCG	::::::::.:::::::: .:	AGAGGAGGAGGAUGAAGAUGA	Cleavage	| PP2A regulatory subunit TAP46-like protein | HC | chr1:19528724-19531081 | 20130731	1
Rir2216	Medtr4g088650.1	2.5	-1.0	1	21	381	401	UUUUCUUCAUCUUCCUCCUCG	:: :::::::: ::::::::	AGAAGAGGAAGAAGAAGAAAA	Cleavage	| SNF2 family amine-terminal protein | LC | chr4:35262164-35266682 | 20130731	1
Rir2216	Medtr2g043880.1	2.5	-1.0	1	21	487	507	UUUUCUUCAUCUUCCUCCUCG	::::::::.:: ::.:::::	GGAGGAGGAGGAGGAGGAAAA	Cleavage	| Nodule-specific Glycine Rich Peptide | HC | chr2:19065779-19064765 | 20130731	1
Rir2216	Medtr3g098800.1	2.5	-1.0	1	21	459	479	UUUUCUUCAUCUUCCUCCUCG	::::::::::: :::::..:	GGAGGAGGAAGACGAAGAGGA	Cleavage	| hypothetical protein | LC | chr3:45273408-45272085 | 20130731	1
Rir2216	Medtr3g100190.1	2.5	-1.0	1	21	321	341	UUUUCUUCAUCUUCCUCCUCG	::: :: :::::::::::::.	CGAAGAUGAAGAUGAAGAAAG	Cleavage	| kinase interacting (KIP1-like) family protein | HC | chr3:46042395-46039277 | 20130731	1
Rir2216	Medtr1g025830.1	2.5	-1.0	1	21	345	365	UUUUCUUCAUCUUCCUCCUCG	::::::::::: :::::..:	AGAGGAGGAAGAAGAAGAGGA	Cleavage	| F-box-like protein | LC | chr1:8301266-8300592 | 20130731	1
Rir2216	Medtr2g021640.1	2.5	-1.0	1	21	438	458	UUUUCUUCAUCUUCCUCCUCG	::::::::.:: ::::::.:	GGAGGAGGAGGAAGAAGAAGA	Cleavage	| F-box-like protein | LC | chr2:7371305-7370528 | 20130731	1
Rir2216	Medtr7g082820.1	2.5	-1.0	1	21	435	455	UUUUCUUCAUCUUCCUCCUCG	::::::::.::::: :::.:	GGAGGAGGAGGAUGAUGAAGA	Cleavage	| high mobility group (HMG)-box protein | LC | chr7:31761715-31763114 | 20130731	1
Rir2216	Medtr7g114600.1	2.5	-1.0	1	21	344	364	UUUUCUUCAUCUUCCUCCUCG	::: :: ::::::::::::.:	CGAAGAAGAAGAUGAAGAAGA	Cleavage	| DUF573 family protein | HC | chr7:47322775-47320756 | 20130731	1
Rir2216	Medtr1g100240.1	2.5	-1.0	1	21	1208	1228	UUUUCUUCAUCUUCCUCCUCG	::::: ::.::::::::..:	GGAGGACGAGGAUGAAGAGGA	Cleavage	| P-loop nucleoside triphosphate hydrolase superfamily protein | HC | chr1:45178862-45175352 | 20130731	2
Rir2216	Medtr2g103680.1	2.5	-1.0	1	21	336	356	UUUUCUUCAUCUUCCUCCUCG	::::::::::: :::::..:	GGAGGAGGAAGAGGAAGAGGA	Cleavage	| F-box/RNI/FBD-like domain protein | LC | chr2:44636963-44636580 | 20130731	1
Rir2216	Medtr4g107030.1	2.5	-1.0	1	21	1275	1295	UUUUCUUCAUCUUCCUCCUCG	.::::: ::::::::.::..:	UGAGGAUGAAGAUGAGGAGGA	Cleavage	| nonsense-mediated mRNA decay NMD3 family protein | HC | chr4:43995360-43996798 | 20130731	1
